# Supplementary material for: Intracellular functions and motile properties of bi-directional kinesin-5 Cin8 are regulated by neck linker docking
Source: eLife. 2021 Aug 13;10:e71036. doi: 10.7554/eLife.71036 (PMC8456603; doi:10.7554/eLife.71036)
Supplement: Figure 2—source data 1. [file elife-71036-fig2-data1.xlsx]

## Sheet: Sheet 1
wt Cin8						wt Cin8
Experiment #	1	2	3			Experiment #	1	2	3
Number of budded Monopolar cells	49	56	66			% of budded Monopolar cells of total budded cells	18.1481	16.8168	19.8795
Number of budded cells with Short <2µm spindles	149	164	131			% of budded cells with Short <2µm spindles of total budded cells	55.1852	49.2492	39.4578
Number of budded cells with Long >2µm spindles	72	113	135			% of budded cells with Long >2µm spindles of total budded cells	26.6667	33.9339	40.6627
total number of budded cells	270	333	332			% of budded cells of total number of cells	96.7742	91.2329	92.9972
Number of unbudded cells	9	32	25			% of unbudded cells of total cells	3.22581	8.76712	7.0028
Cin8-G522N						Cin8-G522N
Experiment #	1	2	3			Experiment #	1	2	3
Number of budded Monopolar cells	38	54	70			Number of budded Monopolar cells	24.8366	15.562	19.2308
Number of budded cells with Short <2µm spindles	67	200	202			Number of budded cells with Short <2µm spindles	43.7908	57.6369	55.4945
Number of budded cells with Long >2µm spindles	48	93	92			Number of budded cells with Long >2µm spindles	31.3725	26.8012	25.2747
total number of budded cells	153	347	364			total number of budded cells	91.6168	94.0379	94.0568
Number of unbudded cells	14	22	23			Unbudded cells	8.38323	5.96206	5.94315
Cin8NLEg5-N522G						Cin8NLEg5-N522G
Experiment #	1	2	3			Experiment #	1	2	3
Number of budded Monopolar cells	37	92	101			Number of budded Monopolar cells	26.0563	22.7723	24.5742
Number of budded cells with Short <2µm spindles	64	184	173			Number of budded cells with Short <2µm spindles	45.0704	45.5446	42.0925
Number of budded cells with Long >2µm spindles	41	128	137			Number of budded cells with Long >2µm spindles	28.8732	31.6832	33.3333
total number of budded cells	142	404	411			total number of budded cells	94.6667	94.3925	91.3333
Number of unbudded cells	8	24	39			Unbudded cells	5.33333	5.60748	8.66667
Cin8NLCut7						Cin8NLCut7
Experiment #	1	2	3			Experiment #	1	2	3
Number of budded Monopolar cells	85	166	140			Number of budded Monopolar cells	45.6989	44.385	43.0769
Number of budded cells with Short <2µm spindles	54	127	107			Number of budded cells with Short <2µm spindles	29.0323	33.9572	32.9231
Number of budded cells with Long >2µm spindles	47	81	78			Number of budded cells with Long >2µm spindles	25.2688	21.6578	24
total number of budded cells	186	374	325			total number of budded cells	97.3822	94.4444	92.3295
Number of unbudded cells	5	22	27			Unbudded cells	2.6178	5.55556	7.67045
Cin8NLEg5						Cin8NLEg5
Experiment #	1	2	3			Experiment #	1	2	3
Number of budded Monopolar cells	82	104	121			Number of budded Monopolar cells	44.3243	39.0977	43.0605
Number of budded cells with Short <2µm spindles	53	78	80			Number of budded cells with Short <2µm spindles	28.6486	29.3233	28.4698
Number of budded cells with Long >2µm spindles	50	84	80			Number of budded cells with Long >2µm spindles	27.027	31.5789	28.4698
total number of budded cells	185	266	281			total number of budded cells	94.8718	96.7273	97.2318
Number of unbudded cells	10	9	8			Unbudded cells	5.12821	3.27273	2.76817
Cin8NLCut7-N522G						Cin8NLCut7-N522G
Experiment #	1	2	3			Experiment #	1	2	3
Number of budded Monopolar cells	95	76	85			Number of budded Monopolar cells	45.0237	20.3209	26.1538
Number of budded cells with Short <2µm spindles	54	48	52			Number of budded cells with Short <2µm spindles	29.0323	12.8342	16
Number of budded cells with Long >2µm spindles	62	78	65			Number of budded cells with Long >2µm spindles	33.3333	20.8556	20
total number of budded cells	211	202	202			total number of budded cells	89.4068	84.8739	85.2321
Number of unbudded cells	25	36	35			Unbudded cells	10.5932	15.1261	14.7679
pRS316						pRS316
Experiment #	1	2	3			Experiment #	1	2	3
Number of budded Monopolar cells	89	67	59			Number of budded Monopolar cells	42.1801	17.9144	18.1538
Number of budded cells with Short <2µm spindles	70	49	37			Number of budded cells with Short <2µm spindles	37.6344	13.1016	11.3846
Number of budded cells with Long >2µm spindles	47	109	37			Number of budded cells with Long >2µm spindles	25.2688	29.1444	11.3846
total number of budded cells	206	225	133			total number of budded cells	94.9309	94.1423	88.0795
Number of unbudded cells	11	14	18			Unbudded cells	5.06912	5.85774	11.9205
