# Supplementary material for: Intracellular functions and motile properties of bi-directional kinesin-5 Cin8 are regulated by neck linker docking
Source: eLife. 2021 Aug 13;10:e71036. doi: 10.7554/eLife.71036 (PMC8456603; doi:10.7554/eLife.71036)
Supplement: Figure 4—source data 1. [file elife-71036-fig4-data1.xlsx]

## Sheet: Sheet 1
number of particles on MTs in 346 µm2 area	wt Cin8	Cin8NLEg5	Cin8-G522N	Cin8NLCut7	Cin8NLEg5-N522G	Cin8NLCut7-N522G
Area 1	0.29926	0.02759	0.13319	0.16911	0.20834	0.0665192
Area 2	0.28406	0.04105	0.05726	0.16953	0.12033	0.0552758
Area 3	0.26385	0.03554	0.23595	0.11059	0.08202	0.0510412
Area 4	0.3517	0	0.20627	0.06231	0.19928	0
Area 5	0.55167	0.04973	0.10334	0.05467	0.1112	0
Area 6	0.6208	0.02927	0.22259	0.08362	0.11001	0.19335
Area 7	0.34908	0	0.08819	0.16041	0.0328	0.159994
Area 8	0.68625	0.03467	0.04682	0.07402	0.16355	0
Area 9	0.50523	0	0.17257	0.1304	0.14224	0
Area 10	0.33736	0	0.03333	0.14374	0.10593	0.0949079
Area 11	0.47843	0.0496	0.03858	0.04512	0.09826	0.0715675
Area 12	0.55361	0.18791	0.14131	0.20062	0.18897	0.178211
Area 13	0.61201	0.06522	0.17999	0.18261	0.04244	0.0557974
Area 14	0.8625	0.13089	0.03279	0.18434	0.06244	0
Area 15	0.21269	0.09811	0.23749		0.04913	0.0960885
Area 16	0.4435	0.03691	0.16534		0.14762	0.0920738
Area 17	0.52318	0.02058	0.1522		0.05891	0.0543438
Area 18	0.41391	0.04491	0.09112		0	0.0823027
Area 19	0.53209	0.03429	0.35042		0.17558	0.291474
Area 20	0.27963	0.0868	0.15787		0.1091
Area 21	0.26742	0.02278	0.11217		0.19578
Area 22		0	0.05263		0
Area 23		0.12873	0.06232		0.12779
Area 24		0.07719	0.05016
Area 25		0.05268
Average	0.448963	0.050178	0.130163	0.126506	0.110075	0.0812078
SD	0.166712	0.0467323	0.0816444	0.0539698	0.0623492	0.0778765
count	21	25	24	14	23	19
SEM	0.0363796	0.00934646	0.0166656	0.014424	0.0130007	0.0178661
