# Supplementary material for: Intracellular functions and motile properties of bi-directional kinesin-5 Cin8 are regulated by neck linker docking
Source: eLife. 2021 Aug 13;10:e71036. doi: 10.7554/eLife.71036 (PMC8456603; doi:10.7554/eLife.71036)
Supplement: Figure 4—source data 2. [file elife-71036-fig4-data2.xlsx]

## Sheet: Data MD
	wt Cin8			Cin8-G522N			Cin8NLCut7			Cin8NLEg5-N522G
	n= 92			n= 35			n=30			n=34
time (s)	MD (nm)	SD	SEM	MD (nm)	SD	SEM	MD (nm)	SD	SEM	MD (nm)	SD	SEM
0	0	0	0	0	0	0	0	0	0	0	0	0
1	-346.725	288.152	7.58821	-166.217	266.957	10.5855	-204.376	297.679	13.7749	-289.534	350.279	16.494
2	-689.516	522.6	14.2234	-321.446	464.453	18.9454	-402.056	480.137	22.9681	-566.488	621.353	30.4278
3	-1022.37	752.29	21.2102	-464.216	659.049	27.7019	-581.275	650.112	32.2248	-821.742	888.681	45.4095
4	-1342.21	980.763	28.722	-590.374	822.903	35.711	-745.117	816.595	42.0568	-1040.46	1147.28	61.4128
5	-1643.12	1205.51	36.7337	-703.244	976.357	43.7956	-890.231	973.814	52.2019	-1225.27	1368.4	76.9787
6	-1926.34	1433.85	45.5707	-809.439	1121.28	51.9423	-1007.24	1099.06	61.5358	-1370.8	1555.12	92.1174
7	-2193.48	1663.77	55.2751	-895.104	1255.87	60.0764	-1116.04	1221.03	71.3335	-1495.1	1704.53	105.71
8	-2445.12	1891.71	65.7017				-1211.08	1338.91	81.6347

## Sheet: wt Cin8
	Molecules	92											MD
MT#1 (3)			-973.709	-1799.33	-2286.1	-2857.81	-3704.45	-4529.71	-4762.5	-4889.5
			-825.625	-1312.39	-1884.11	-2730.74	-3556	-3788.79	-3915.79
			-486.763	-1058.48	-1905.12	-2730.37	-2963.17	-3090.17
			-571.718	-1418.35	-2243.61	-2476.4	-2603.4
			-846.636	-1671.89	-1904.69	-2031.69
			-825.259	-1058.05	-1185.05
			-232.791	-359.791
			-127
MT#1 (4)			-423.816	-614.157	-1059.14	-1608.71	-2201.29	-2603.5	-3196.28	-3429	-3852.35	-4296.84	-4741.34	-5080.18	-5334.38	-5631.29	-5673.34
			-190.342	-635.325	-1184.89	-1777.48	-2179.68	-2772.46	-3005.18	-3428.53	-3873.03	-4317.52	-4656.36	-4910.56	-5207.47	-5249.53
			-444.983	-994.552	-1587.13	-1989.34	-2582.12	-2814.84	-3238.19	-3682.69	-4127.18	-4466.02	-4720.22	-5017.13	-5059.18
			-549.568	-1142.15	-1544.36	-2137.14	-2369.86	-2793.21	-3237.7	-3682.2	-4021.04	-4275.24	-4572.15	-4614.2
			-592.582	-994.791	-1587.57	-1820.29	-2243.64	-2688.13	-3132.63	-3471.47	-3725.67	-4022.58	-4064.63
			-402.209	-994.988	-1227.71	-1651.06	-2095.55	-2540.05	-2878.89	-3133.09	-3430	-3472.05
			-592.779	-825.5	-1248.85	-1693.34	-2137.84	-2476.68	-2730.88	-3027.79	-3069.84
			-232.721	-656.07	-1100.56	-1545.06	-1883.9	-2138.1	-2435.01	-2477.06
			-423.349	-867.843	-1312.34	-1651.18	-1905.38	-2202.29	-2244.34
			-444.494	-888.989	-1227.83	-1482.03	-1778.94	-1820.99
			-444.495	-783.334	-1037.53	-1334.44	-1376.5
			-338.839	-593.04	-889.949	-932.003
			-254.201	-551.11	-593.164
			-296.909	-338.963
			-42.0542
MT#1 (5)			-282.316	-475.647	-785.652	-981.83	-1533.37	-1993.63	-2612.09	-2969.41	-3629.95	-4290.69	-4032.48	-4561.85	-5091.28	-4984.2	-5450.33	-5932.97	-7096.13	-7626.61	-6995.38	-6869.78
			-193.331	-503.336	-699.514	-1251.06	-1711.32	-2329.78	-2687.09	-3347.63	-4008.38	-3750.17	-4279.54	-4808.96	-4701.89	-5168.01	-5650.65	-6813.81	-7344.3	-6713.07	-6587.47
			-310.006	-506.184	-1057.73	-1517.98	-2136.45	-2493.76	-3154.3	-3815.05	-3556.84	-4086.21	-4615.63	-4508.56	-4974.68	-5457.32	-6620.48	-7150.97	-6519.74	-6394.14
			-196.178	-747.721	-1207.98	-1826.44	-2183.76	-2844.3	-3505.04	-3246.83	-3776.2	-4305.63	-4198.55	-4664.67	-5147.32	-6310.48	-6840.96	-6209.73	-6084.13
			-551.543	-1011.8	-1630.26	-1987.58	-2648.12	-3308.86	-3050.65	-3580.02	-4109.45	-4002.37	-4468.5	-4951.14	-6114.3	-6644.78	-6013.55	-5887.95
			-460.257	-1078.72	-1436.03	-2096.57	-2757.32	-2499.11	-3028.48	-3557.91	-3450.83	-3916.95	-4399.59	-5562.76	-6093.24	-5462.01	-5336.41
			-618.462	-975.777	-1636.32	-2297.06	-2038.85	-2568.22	-3097.65	-2990.57	-3456.69	-3939.34	-5102.5	-5632.98	-5001.75	-4876.15
			-357.314	-1017.85	-1678.6	-1420.39	-1949.76	-2479.19	-2372.11	-2838.23	-3320.87	-4484.04	-5014.52	-4383.29	-4257.69
			-660.54	-1321.29	-1063.07	-1592.45	-2121.87	-2014.8	-2480.92	-2963.56	-4126.72	-4657.2	-4025.98	-3900.38
			-660.746	-402.534	-931.906	-1461.33	-1354.26	-1820.38	-2303.02	-3466.18	-3996.66	-3365.44	-3239.84
			258.212	-271.16	-800.586	-693.511	-1159.63	-1642.27	-2805.44	-3335.92	-2704.69	-2579.09
			-529.371	-1058.8	-951.723	-1417.84	-1900.49	-3063.65	-3594.13	-2962.9	-2837.3
			-529.426	-422.352	-888.472	-1371.12	-2534.28	-3064.76	-2433.53	-2307.93
			107.074	-359.046	-841.689	-2004.85	-2535.33	-1904.1	-1778.51
			-466.121	-948.764	-2111.92	-2642.41	-2011.18	-1885.58
			-482.643	-1645.8	-2176.29	-1545.06	-1419.46
			-1163.16	-1693.64	-1062.41	-936.816
			-530.482	100.747	226.345
			631.229	756.827
			125.599
MT#2 (1)			-540.683	-987.828	-1487.85	-2223.63	-2858.38	-3440.89	-4187.63	-4776.66	-5382.63	-5813.29	-5951.41
			-447.145	-947.17	-1682.95	-2317.7	-2900.2	-3646.95	-4235.98	-4841.95	-5272.6	-5410.73
			-500.024	-1235.81	-1870.55	-2453.06	-3199.8	-3788.83	-4394.8	-4825.46	-4963.58
			-735.781	-1370.53	-1953.03	-2699.78	-3288.81	-3894.78	-4325.43	-4463.56
			-634.748	-1217.25	-1964	-2553.03	-3159	-3589.65	-3727.78
			-582.504	-1329.25	-1918.28	-2524.25	-2954.9	-3093.03
			-746.746	-1335.77	-1941.75	-2372.4	-2510.52
			-589.029	-1195	-1625.65	-1763.78
			-605.971	-1036.62	-1174.75
			-430.654	-568.779
			-138.125
MT#2 (2)			185.133	292.721	653.773	889.567	953.029	1083.69	1740.47
			107.588	468.64	704.434	767.896	898.561	1555.33
			361.052	596.846	660.308	790.974	1447.75
			235.794	299.257	429.922	1086.7
			63.4622	194.127	850.901
			130.665	787.439
			656.774
MT#3 (1)			-271.152	-457.905	-504.891	-793.456	-1117.68	-1600.32	-1485.44	-1788.64	-2046.31	-2385.54	-2780.55
			-186.753	-233.74	-522.304	-846.532	-1329.16	-1214.29	-1517.49	-1775.16	-2114.39	-2509.39
			-46.9863	-335.551	-659.778	-1142.41	-1027.53	-1330.74	-1588.4	-1927.64	-2322.64
			-288.565	-612.792	-1095.42	-980.546	-1283.75	-1541.42	-1880.65	-2275.65
			-324.228	-806.859	-691.982	-995.189	-1252.85	-1592.09	-1987.09
			-482.632	-367.754	-670.961	-928.625	-1267.86	-1662.86
			114.878	-188.329	-445.993	-785.228	-1180.23
			-303.207	-560.871	-900.106	-1295.11
			-257.663	-596.899	-991.901
			-339.236	-734.238
			-395.002
MT#4 (1)			-506.496	-1509.01	-1988.86	-2396.3	-2675.37	-3250.37	-3695.58	-4425.09	-5057.28	-5729.94	-6296.49	-6308	-6267.49	-6368.1
			-1002.52	-1482.37	-1889.8	-2168.87	-2743.87	-3189.09	-3918.59	-4550.79	-5223.44	-5789.99	-5801.51	-5761	-5861.6
			-479.853	-887.285	-1166.35	-1741.36	-2186.57	-2916.08	-3548.27	-4220.93	-4787.47	-4798.99	-4758.48	-4859.09
			-407.433	-686.502	-1261.5	-1706.72	-2436.23	-3068.42	-3741.07	-4307.62	-4319.14	-4278.63	-4379.23
			-279.069	-854.07	-1299.28	-2028.79	-2660.98	-3333.64	-3900.19	-3911.71	-3871.2	-3971.8
			-575.001	-1020.22	-1749.73	-2381.92	-3054.57	-3621.12	-3632.64	-3592.13	-3692.73
			-445.215	-1174.72	-1806.91	-2479.57	-3046.12	-3057.64	-3017.13	-3117.73
			-729.51	-1361.7	-2034.36	-2600.9	-2612.42	-2571.91	-2672.52
			-632.191	-1304.85	-1871.39	-1882.91	-1842.4	-1943.01
			-672.656	-1239.2	-1250.72	-1210.21	-1310.82
			-566.548	-578.064	-537.556	-638.159
			-11.5166	28.9916	-71.6112
			40.5082	-60.0946
			-100.603
MT#5 (2)			-477.307	-1049.67	-1557.05	-2256.26	-1590.35	-2035.96	-2636.01	-3303.37	-3939.05	-4381.96	-4857.85	-5397.59	-5905.59	-6413.5	-6826.32	-7334.32	-7906.32	-8478.2	-9179.26	-9655.34	-10415.7	-10703.6	-12037.4	-12670.2	-12861.3	-12988.2	-13623.1	-13910.1	-14608.5	-15432.1
			-572.365	-1079.74	-1778.95	-1113.05	-1558.66	-2158.71	-2826.07	-3461.74	-3904.65	-4380.55	-4920.29	-5428.28	-5936.19	-6349.02	-6857.01	-7429.02	-8000.89	-8701.96	-9178.03	-9938.44	-10226.3	-11560.1	-12192.9	-12384	-12510.9	-13145.8	-13432.8	-14131.1	-14954.8
			-507.373	-1206.59	-540.682	-986.292	-1586.34	-2253.7	-2889.38	-3332.29	-3808.18	-4347.92	-4855.91	-5363.83	-5776.65	-6284.65	-6856.65	-7428.53	-8129.59	-8605.67	-9366.07	-9653.89	-10987.8	-11620.5	-11811.6	-11938.6	-12573.4	-12860.5	-13558.8	-14382.4
			-699.216	-33.3096	-478.92	-1078.97	-1746.33	-2382	-2824.91	-3300.81	-3840.55	-4348.54	-4856.45	-5269.28	-5777.27	-6349.28	-6921.16	-7622.22	-8098.3	-8858.7	-9146.52	-10480.4	-11113.2	-11304.2	-11431.2	-12066.1	-12353.1	-14608.5	-13875.1
			665.906	220.297	-379.754	-1047.11	-1682.79	-2125.7	-2601.59	-3141.33	-3649.32	-4157.24	-4570.06	-5078.06	-5650.06	-6221.94	-6923	-7399.08	-8159.48	-8447.3	-9781.18	-10413.9	-10605	-10732	-11366.9	-11653.9	-12352.2	-14954.8
			-445.61	-1045.66	-1713.02	-2348.69	-2791.61	-3267.5	-3807.24	-4315.23	-4823.15	-5235.97	-5743.96	-6315.97	-6887.85	-7588.91	-8064.99	-8825.39	-9113.21	-10447.1	-11079.8	-11270.9	-11397.9	-12032.8	-12319.8	-13018.1	-13841.7
			-600.05	-1267.41	-1903.08	-2346	-2821.89	-3361.63	-3869.62	-4377.54	-4790.36	-5298.35	-5870.36	-6442.24	-7143.3	-7619.38	-8379.78	-8667.6	-10001.5	-10634.2	-10825.3	-10952.3	-11587.2	-11874.2	-12572.5	-13396.1
			-667.359	-1303.03	-1745.95	-2221.84	-2761.58	-3269.57	-3777.49	-4190.31	-4698.3	-5270.31	-5842.19	-6543.25	-7019.33	-7779.73	-8067.55	-9401.42	-10034.2	-10225.2	-10352.2	-10987.1	-11274.1	-11972.4	-12796.1
			-635.674	-1078.59	-1554.48	-2094.22	-2602.21	-3110.13	-3522.95	-4030.95	-4602.95	-5174.83	-5875.89	-6351.97	-7112.37	-7400.19	-8734.06	-9366.83	-9557.88	-9684.86	-10319.7	-10606.8	-11305.1	-12128.7
			-442.912	-918.806	-1458.55	-1966.54	-2474.45	-2887.28	-3395.27	-3967.28	-4539.15	-5240.22	-5716.29	-6476.69	-6764.52	-8098.39	-8731.15	-8922.21	-9049.19	-9684.07	-9971.08	-10669.4	-11493.1
			-475.894	-1015.63	-1523.63	-2031.54	-2444.36	-2952.36	-3524.36	-4096.24	-4797.3	-5273.38	-6033.78	-6321.6	-7655.48	-8288.24	-8479.3	-8606.27	-9241.16	-9528.16	-10226.5	-11050.1
			-539.74	-1047.73	-1555.65	-1968.47	-2476.46	-3048.47	-3620.35	-4321.41	-4797.49	-5557.89	-5845.71	-7179.58	-7812.35	-8003.4	-8130.38	-8765.26	-9052.27	-9750.6	-10574.2
			-507.992	-1015.91	-1428.73	-1936.73	-2508.73	-3080.61	-3781.67	-4257.75	-5018.15	-5305.97	-6639.84	-7272.61	-7463.67	-7590.64	-8225.52	-8512.53	-9210.86	-10034.5
			-507.915	-920.738	-1428.73	-2000.74	-2572.62	-3273.68	-3749.76	-4510.16	-4797.98	-6131.85	-6764.61	-6955.67	-7082.65	-7717.53	-8004.54	-8702.87	-9526.52
			-412.824	-920.819	-1492.82	-2064.7	-2765.76	-3241.84	-4002.24	-4290.06	-5623.94	-6256.7	-6447.76	-6574.73	-7209.62	-7496.62	-8194.95	-9018.6
			-507.995	-1080	-1651.88	-2352.94	-2829.02	-3589.42	-3877.24	-5211.11	-5843.88	-6034.93	-6161.91	-6796.79	-7083.8	-7782.13	-8605.78
			-572.005	-1143.88	-1844.95	-2321.02	-3081.42	-3369.25	-4703.12	-5335.88	-5526.94	-5653.92	-6288.8	-6575.81	-7274.13	-8097.78
			-571.877	-1272.94	-1749.02	-2509.42	-2797.24	-4131.11	-4763.88	-4954.93	-5081.91	-5716.79	-6003.8	-6702.13	-7525.78
			-701.064	-1177.14	-1937.54	-2225.36	-3559.24	-4192	-4383.06	-4510.03	-5144.92	-5431.92	-6130.25	-6953.9
			-476.077	-1236.48	-1524.3	-2858.17	-3490.93	-3681.99	-3808.97	-4443.85	-4730.86	-5429.19	-6252.84
			-760.401	-1048.22	-2382.1	-3014.86	-3205.92	-3332.89	-3967.78	-4254.78	-4953.11	-5776.76
			-287.823	-1621.7	-2254.46	-2445.52	-2572.49	-3207.38	-3494.38	-4192.71	-5016.36
			-1333.87	-1966.63	-2157.69	-2284.67	-2919.55	-3206.56	-3904.89	-4728.54
			-632.761	-823.82	-950.796	-1585.68	-1872.69	-2571.01	-3394.66
			-191.059	-318.034	-952.919	-1239.92	-1938.25	-2761.9
			-126.975	-761.86	-1048.87	-1747.19	-2570.84
			-634.884	-921.89	-1620.22	-2443.87
			-287.006	-985.333	-1808.98
			-698.327	-1521.98
			-823.65
MT#5 (4)			-190.5	-476.25	-857.838	-1239.88	-1715.68	-2190.98	-2698.94	-3238.66	-3651.8	-4001	-4508.95	-5337.4	-5624.14	-5780.68	-6162.45	-6513.7	-6989.62	-7210.68	-7501.13	-7941.56	-8580.96	-8992.03	-9470.5	-9976.78	-10450.6	-11155.8	-11699.6	-12051.7	-12263.6	-12611.5	-13211.8	-13341.4
			-285.75	-667.338	-1049.38	-1525.18	-2000.48	-2508.44	-3048.16	-3461.3	-3810.5	-4318.45	-5146.9	-5433.64	-5590.18	-5971.95	-6323.2	-6799.12	-7020.18	-7310.63	-7751.06	-8390.46	-8801.53	-9280	-9786.28	-10260.1	-10965.3	-11509.1	-11861.2	-12073.1	-12421	-13021.3	-13150.9
			-381.588	-763.627	-1239.43	-1714.73	-2222.69	-2762.41	-3175.55	-3524.75	-4032.7	-4861.15	-5147.89	-5304.43	-5686.2	-6037.45	-6513.37	-6734.43	-7024.88	-7465.31	-8104.71	-8515.78	-8994.25	-9500.53	-9974.32	-10679.6	-11223.3	-11575.5	-11787.3	-12135.3	-12735.6	-12865.1
			-382.039	-857.838	-1333.14	-1841.1	-2380.82	-2793.96	-3143.17	-3651.11	-4479.56	-4766.31	-4922.84	-5304.61	-5655.87	-6131.78	-6352.84	-6643.3	-7083.73	-7723.12	-8134.2	-8612.66	-9118.94	-9592.74	-10298	-10841.7	-11193.9	-12263.6	-11753.7	-12354	-12483.5
			-475.798	-951.103	-1459.06	-1998.78	-2411.92	-2761.13	-3269.07	-4097.52	-4384.27	-4540.8	-4922.57	-5273.83	-5749.74	-5970.8	-6261.26	-6701.69	-7341.09	-7752.16	-8230.62	-8736.9	-9210.7	-9915.95	-10459.7	-10811.8	-11023.7	-12421	-11971.9	-12101.5
			-475.305	-983.261	-1522.98	-1936.13	-2285.33	-2793.27	-3621.73	-3908.47	-4065	-4446.77	-4798.03	-5273.94	-5495	-5785.46	-6225.89	-6865.29	-7276.36	-7754.82	-8261.1	-8734.9	-9440.15	-9983.89	-10336	-10547.9	-10895.8	-12735.6	-11625.7
			-507.957	-1047.68	-1460.82	-1810.02	-2317.97	-3146.42	-3433.16	-3589.7	-3971.47	-4322.72	-4798.64	-5019.7	-5310.15	-5750.58	-6389.98	-6801.05	-7279.52	-7785.8	-8259.59	-8964.84	-9508.58	-9860.73	-10072.6	-10420.5	-11020.8	-12483.5
			-539.719	-952.865	-1302.07	-1810.01	-2638.46	-2925.21	-3081.74	-3463.51	-3814.77	-4290.68	-4511.74	-4802.2	-5242.63	-5882.03	-6293.1	-6771.56	-7277.84	-7751.64	-8456.89	-9000.63	-9352.77	-9564.62	-9912.57	-10512.9	-10642.4
			-413.146	-762.348	-1270.29	-2098.75	-2385.49	-2542.02	-2923.79	-3275.05	-3750.96	-3972.02	-4262.48	-4702.91	-5342.31	-5753.38	-6231.84	-6738.12	-7211.92	-7917.17	-8460.91	-8813.05	-9024.9	-9372.85	-9973.16	-10102.7
			-349.202	-857.145	-1685.6	-1972.34	-2128.88	-2510.64	-2861.9	-3337.81	-3558.87	-3849.33	-4289.76	-4929.16	-5340.23	-5818.7	-6324.98	-6798.77	-7504.02	-8047.76	-8399.91	-8611.76	-8959.7	-9560.01	-9689.58
			-507.943	-1336.4	-1623.14	-1779.68	-2161.44	-2512.7	-2988.61	-3209.67	-3500.13	-3940.56	-4579.96	-4991.03	-5469.49	-5975.77	-6449.57	-7154.82	-7698.56	-8050.7	-8262.55	-8610.5	-9210.81	-9340.38
			-828.454	-1115.2	-1271.73	-1653.5	-2004.76	-2480.67	-2701.73	-2992.19	-3432.62	-4072.02	-4483.09	-4961.55	-5467.83	-5941.63	-6646.88	-7190.62	-7542.76	-7754.61	-8102.56	-8702.87	-8832.44
			-286.742	-443.28	-825.044	-1176.3	-1652.22	-1873.28	-2163.73	-2604.16	-3243.56	-3654.63	-4133.1	-4639.38	-5113.17	-5818.42	-6362.16	-6714.31	-6926.16	-7274.11	-7874.41	-8003.99
			-156.537	-538.302	-889.561	-1365.47	-1586.53	-1876.99	-2317.42	-2956.82	-3367.89	-3846.36	-4352.63	-4826.43	-5531.68	-6075.42	-6427.56	-6639.42	-6987.36	-7587.67	-7717.24
			-381.765	-733.024	-1208.94	-1430	-1720.45	-2160.88	-2800.28	-3211.35	-3689.82	-4196.1	-4669.89	-5375.14	-5918.88	-6271.03	-6482.88	-6830.83	-7431.14	-7560.71
			-351.259	-827.171	-1048.23	-1338.69	-1779.12	-2418.52	-2829.59	-3308.05	-3814.33	-4288.13	-4993.38	-5537.12	-5889.26	-6101.11	-6449.06	-7049.37	-7178.94
			-475.912	-696.972	-987.431	-1427.86	-2067.26	-2478.33	-2956.79	-3463.07	-3936.87	-4642.12	-5185.86	-5538	-5749.85	-6097.8	-6698.11	-6827.68
			-221.059	-511.518	-951.946	-1591.35	-2002.42	-2480.88	-2987.16	-3460.96	-4166.21	-4709.95	-5062.09	-5273.94	-5621.89	-6222.2	-6351.77
			-290.459	-730.887	-1370.29	-1781.36	-2259.82	-2766.1	-3239.9	-3945.15	-4488.89	-4841.03	-5052.88	-5400.83	-6001.14	-6130.71
			-440.428	-1079.83	-1490.9	-1969.36	-2475.64	-2949.44	-3654.69	-4198.43	-4550.57	-4762.42	-5110.37	-5710.68	-5840.25
			-639.4	-1050.47	-1528.94	-2035.21	-2509.01	-3214.26	-3758	-4110.14	-4322	-4669.94	-5270.25	-5399.82
			-411.072	-889.536	-1395.82	-1869.61	-2574.86	-3118.6	-3470.75	-3682.6	-4030.54	-4630.85	-4760.42
			-478.464	-984.743	-1458.54	-2163.79	-2707.53	-3059.67	-3271.52	-3619.47	-4219.78	-4349.35
			-506.279	-980.075	-1685.32	-2229.06	-2581.21	-2793.06	-3141.01	-3741.32	-3870.89
			-473.797	-1179.04	-1722.79	-2074.93	-2286.78	-2634.73	-3235.04	-3364.61
			-705.248	-1248.99	-1601.13	-1812.98	-2160.93	-2761.24	-2890.81
			-543.74	-895.885	-1107.74	-1455.68	-2055.99	-2185.56
			-352.145	-563.996	-911.943	-1512.25	-1641.82
			-211.85	-559.798	-1160.11	-1289.68
			-347.948	-948.257	-1077.83
			-600.309	-729.88
			-129.571
MT#5 (5)			-224.506	-540.683	-1113.06	-1434.38	-1529.28	-1788.18	-2142.36	-2429.86	-2707.89	-3277.79
			-316.177	-888.556	-1209.88	-1304.78	-1563.67	-1917.85	-2205.35	-2483.38	-3053.29
			-572.38	-893.7	-988.599	-1247.49	-1601.68	-1889.18	-2167.2	-2737.11
			-321.321	-416.22	-675.113	-1029.3	-1316.8	-1594.82	-2164.73
			-94.8992	-353.793	-707.977	-995.477	-1273.5	-1843.41
			-258.894	-613.078	-900.578	-1178.6	-1748.51
			-354.184	-641.684	-919.71	-1489.62
			-287.5	-565.525	-1135.43
			-278.026	-847.933
			-569.907
MT#6 (1)			-454.591	-1206.92	-1682.75	-2635.25	-3111.66	-3302.61	-3906.41	-4541.25	-5241.15	-5910.96	-6548.2	-6803.47	-7276.36	-7848.67	-8578.38	-9310.55	-9785.23	-10736.2	-11562.3	-12355.7	-12990.4	-13689.6	-14422.4	-14929.1	-15343.7	-16360.2	-16968.9	-17633.9	-18240.4	-18687.2
			-752.327	-1228.16	-2180.66	-2657.07	-2848.02	-3451.82	-4086.66	-4786.56	-5456.37	-6093.61	-6348.88	-6821.77	-7394.08	-8123.79	-8855.96	-9330.64	-10281.6	-11107.7	-11901.1	-12535.9	-13235	-13967.8	-14474.5	-14889.1	-15905.6	-16514.3	-17179.3	-17785.8	-18232.7
			-475.832	-1428.33	-1904.74	-2095.69	-2699.49	-3334.33	-4034.24	-4704.04	-5341.28	-5596.55	-6069.45	-6641.76	-7371.46	-8103.63	-8578.32	-9529.28	-10355.4	-11148.8	-11783.5	-12482.6	-13215.4	-13722.2	-14136.7	-15153.2	-15762	-16426.9	-17033.5	-17480.3
			-952.5	-1428.91	-1619.86	-2223.66	-2858.5	-3558.4	-4228.21	-4865.45	-5120.72	-5593.61	-6165.92	-6895.63	-7627.8	-8102.48	-9053.45	-9879.53	-10672.9	-11307.7	-12006.8	-12739.6	-13246.4	-13660.9	-14677.4	-15286.1	-15951.1	-18240.4	-17004.5
			-476.412	-667.361	-1271.16	-1906	-2605.9	-3275.71	-3912.95	-4168.22	-4641.11	-5213.42	-5943.13	-6675.3	-7149.98	-8100.95	-8927.03	-9720.44	-10355.2	-11054.3	-11787.1	-12293.9	-12708.4	-13724.9	-14333.6	-14998.6	-15605.2	-18232.7
			-190.949	-794.749	-1429.59	-2129.49	-2799.3	-3436.54	-3691.81	-4164.7	-4737.01	-5466.72	-6198.89	-6673.57	-7624.53	-8450.61	-9244.03	-9878.78	-10577.9	-11310.7	-11817.5	-12232	-13248.5	-13857.2	-14522.2	-15128.8	-15575.6
			-603.801	-1238.64	-1938.54	-2608.35	-3245.59	-3500.86	-3973.75	-4546.06	-5275.77	-6007.94	-6482.62	-7433.59	-8259.67	-9053.08	-9687.84	-10386.9	-11119.8	-11626.5	-12041.1	-13057.5	-13666.3	-14331.2	-14937.8	-15384.6
			-634.838	-1334.74	-2004.55	-2641.79	-2897.06	-3369.95	-3942.26	-4671.97	-5404.14	-5878.82	-6829.78	-7655.86	-8449.28	-9084.03	-9783.14	-10516	-11022.7	-11437.3	-12453.7	-13062.5	-13727.4	-14334	-14780.8
			-699.906	-1369.71	-2006.95	-2262.22	-2735.11	-3307.43	-4037.13	-4769.3	-5243.99	-6194.95	-7021.03	-7814.44	-8449.2	-9148.3	-9881.12	-10387.9	-10802.4	-11818.9	-12427.6	-13092.6	-13699.2	-14146
			-669.805	-1307.05	-1562.32	-2035.21	-2607.52	-3337.22	-4069.39	-4544.08	-5495.04	-6321.12	-7114.53	-7749.29	-8448.4	-9181.21	-9687.96	-10102.5	-11119	-11727.7	-12392.7	-12999.3	-13446.1
			-637.242	-892.51	-1365.4	-1937.71	-2667.42	-3399.59	-3874.27	-4825.24	-5651.32	-6444.73	-7079.49	-7778.59	-8511.41	-9018.16	-9432.7	-10449.2	-11057.9	-11722.9	-12329.5	-12776.3
			-255.268	-728.161	-1300.47	-2030.18	-2762.35	-3237.03	-4187.99	-5014.07	-5807.49	-6442.24	-7141.35	-7874.16	-8380.92	-8795.46	-9811.95	-10420.7	-11085.7	-11692.2	-12139
			-472.893	-1045.2	-1774.91	-2507.08	-2981.76	-3932.73	-4758.81	-5552.22	-6186.98	-6886.08	-7618.9	-8125.65	-8540.19	-9556.69	-10165.4	-10830.4	-11437	-11883.8
			-572.311	-1302.01	-2034.19	-2508.87	-3459.83	-4285.91	-5079.32	-5714.08	-6413.19	-7146	-7652.76	-8067.3	-9083.79	-9692.52	-10357.5	-10964.1	-11410.9
			-729.703	-1461.87	-1936.56	-2887.52	-3713.6	-4507.01	-5141.77	-5840.88	-6573.69	-7080.44	-7494.99	-8511.48	-9120.21	-9785.19	-10391.7	-10838.6
			-732.171	-1206.86	-2157.82	-2983.9	-3777.31	-4412.07	-5111.18	-5843.99	-6350.74	-6765.28	-7781.78	-8390.5	-9055.48	-9662.05	-10108.9
			-474.686	-1425.65	-2251.73	-3045.14	-3679.9	-4379	-5111.82	-5618.57	-6033.11	-7049.61	-7658.33	-8323.31	-8929.87	-9376.69
			-950.961	-1777.04	-2570.45	-3205.21	-3904.32	-4637.13	-5143.88	-5558.43	-6574.92	-7183.65	-7848.63	-8455.19	-8902.01
			-826.08	-1619.49	-2254.25	-2953.36	-3686.17	-4192.92	-4607.47	-5623.96	-6232.69	-6897.66	-7504.23	-7951.05
			-793.411	-1428.17	-2127.28	-2860.09	-3366.84	-3781.39	-4797.88	-5406.61	-6071.58	-6678.15	-7124.97
			-634.759	-1333.87	-2066.68	-2573.43	-2987.97	-4004.47	-4613.2	-5278.17	-5884.74	-6331.55
			-699.107	-1431.92	-1938.67	-2353.22	-3369.71	-3978.44	-4643.41	-5249.98	-5696.8
			-732.813	-1239.57	-1654.11	-2670.6	-3279.33	-3944.31	-4550.87	-4997.69
			-506.753	-921.296	-1937.79	-2546.52	-3211.49	-3818.06	-4264.88
			-414.543	-1431.04	-2039.76	-2704.74	-3311.3	-3758.12
			-1016.49	-1625.22	-2290.2	-2896.76	-3343.58
			-608.726	-1273.7	-1880.27	-2327.09
			-664.977	-1271.54	-1718.36
			-606.564	-1053.38
			-446.819
MT#6 (2)			-287.508	-231.143	-271.272	70.9952	70.9952	200.805	63.5	70.9952	-100.402	-141.99	-70.9952	-190.5	-382.321
			56.365	16.2364	358.504	358.504	488.313	351.008	358.504	187.106	145.518	216.513	97.0085	-94.8121
			-40.1286	302.139	302.139	431.948	294.643	302.139	130.741	89.1532	160.148	40.6435	-151.177
			342.267	342.267	472.077	334.772	342.267	170.87	129.282	200.277	80.7721	-111.049
			0	129.809	-7.49516	0	-171.397	-212.985	-141.99	-261.495	-453.316
			129.809	-7.49516	0	-171.397	-212.985	-141.99	-261.495	-453.316
			-137.305	-129.809	-301.207	-342.795	-271.8	-391.305	-583.125
			7.49516	-163.902	-205.49	-134.495	-254	-445.821
			-171.397	-212.985	-141.99	-261.495	-453.316
			-41.588	29.4072	-90.0977	-281.918
			70.9952	-48.5097	-240.33
			-119.505	-311.325
			-191.821
MT#7 (1)			95.25	89.8026	100.402	287.508	141.99	-63.5	127	89.8026	231.143	130.909	158.75	247.975	292.721	508.991	445.632	431.847	604.085	417.606	575.017	606.583	572.381	733.006	635.793	764.641	701.38	548.09	764.641	809.469	866.606	830.977
			-5.44744	5.15232	192.258	46.7403	-158.75	31.75	-5.44744	135.893	35.6586	63.5	152.725	197.471	413.741	350.382	336.597	508.835	322.356	479.767	511.333	477.131	637.756	540.543	669.391	606.13	452.84	669.391	714.219	771.356	735.727
			10.5998	197.706	52.1878	-153.303	37.1974	0	141.341	41.106	68.9474	158.173	202.918	419.189	355.83	342.044	514.282	327.803	485.214	516.78	482.579	643.203	545.991	674.839	611.578	458.287	674.839	719.667	776.804	741.174
			187.106	41.588	-163.902	26.5977	-10.5998	130.741	30.5063	58.3477	147.573	192.318	408.589	345.23	331.444	503.683	317.204	474.615	506.181	471.979	632.603	535.391	664.239	600.978	447.688	664.239	709.067	866.606	730.575
			-145.518	-351.008	-160.508	-197.706	-56.365	-156.6	-128.758	-39.5331	5.21206	221.483	158.124	144.338	316.576	130.098	287.508	319.074	284.873	445.497	348.285	477.133	413.872	260.582	477.133	521.961	579.098	735.727
			-205.49	-14.9903	-52.1878	89.1532	-11.0817	16.7597	105.985	150.73	367.001	303.642	289.856	462.095	275.616	433.027	464.593	430.391	591.015	493.803	622.651	559.39	406.1	622.651	667.479	724.616	688.987
			190.5	153.303	294.643	194.409	222.25	311.475	356.221	572.491	509.132	495.347	667.585	481.106	638.517	670.083	635.881	796.506	699.293	828.141	764.88	611.59	828.141	872.969	930.106	894.477
			-37.1974	104.143	3.9086	31.75	120.975	165.721	381.991	318.632	304.847	477.085	290.606	448.017	479.583	445.381	606.006	508.793	637.641	574.38	421.09	637.641	682.469	739.606	703.977
			141.341	41.106	68.9474	158.173	202.918	419.189	355.83	342.044	514.282	327.803	485.214	516.78	482.579	643.203	545.991	674.839	611.578	458.287	674.839	719.667	776.804	741.174
			-100.235	-72.3935	16.8319	61.577	277.848	214.489	200.703	372.941	186.463	343.873	375.439	341.238	501.862	404.65	533.498	470.237	316.946	533.498	578.326	635.463	599.834
			27.8414	117.067	161.812	378.083	314.724	300.938	473.176	286.697	444.108	475.674	441.473	602.097	504.885	633.733	570.472	417.181	633.733	678.561	735.698	700.068
			89.2254	133.971	350.241	286.882	273.097	445.335	258.856	416.267	447.833	413.631	574.256	477.043	605.891	542.63	389.34	605.891	650.719	707.856	672.227
			44.7451	261.016	197.657	183.871	356.11	169.631	327.042	358.607	324.406	485.03	387.818	516.666	453.405	300.115	516.666	561.494	618.631	583.002
			216.271	152.912	139.126	311.364	124.886	282.296	313.862	279.661	440.285	343.073	471.921	408.66	255.369	471.921	516.749	573.886	538.256
			-63.3587	-77.1445	95.0937	-91.3852	66.0257	97.5917	63.39	224.014	126.802	255.65	192.389	39.0988	255.65	300.478	357.615	321.986
			-13.7858	158.452	-28.0264	129.384	160.95	126.749	287.373	190.161	319.009	255.748	102.457	319.009	363.837	420.974	385.345
			172.238	-14.2406	143.17	174.736	140.535	301.159	203.947	332.795	269.534	116.243	332.795	377.623	434.76	399.13
			-186.479	-29.068	2.49795	-31.7037	128.921	31.7083	160.556	97.2955	-55.995	160.556	205.384	262.521	226.892
			157.411	188.977	154.775	315.4	218.187	347.035	283.774	130.484	347.035	391.863	449	413.371
			31.5659	-2.63569	157.989	60.7763	189.624	126.363	-26.927	189.624	234.452	291.589	255.96
			-34.2016	126.423	29.2104	158.058	94.7975	-58.4929	158.058	202.886	260.023	224.394
			160.624	63.412	192.26	128.999	-24.2913	192.26	237.088	294.225	258.596
			-97.2124	31.6356	-31.6252	-184.916	31.6356	76.4637	133.601	97.9714
			128.848	65.5872	-87.7033	128.848	173.676	230.813	195.184
			-63.2608	-216.551	0	44.8281	101.965	66.3358
			-153.29	63.2608	108.089	165.226	129.597
			216.551	261.379	318.516	282.887
			44.8281	101.965	66.3358
			57.137	21.5077
			-35.6293
MT#7 (2)			-222.25	-392.726	-866.606	-1150.03	-1206.5	-1178.61	-1302.14	-1430.16	-1651.31	-1746.54	-2032	-2192.82	-2383.15	-2420.51	-2510.06	-2670.02	-2731.24	-2859.09	-2857.68	-3048.66	-3242.39	-3366.85	-3239.12	-3493.08	-3685.19	-3842.93	-4480.8	-4826.42
			-170.476	-644.356	-927.784	-984.25	-956.355	-1079.89	-1207.91	-1429.06	-1524.29	-1809.75	-1970.57	-2160.9	-2198.26	-2287.81	-2447.77	-2508.99	-2636.84	-2635.43	-2826.41	-3020.14	-3144.6	-3016.87	-3270.83	-3462.94	-3620.68	-4258.55	-4604.17
			-473.881	-757.308	-813.774	-785.879	-909.411	-1037.43	-1258.58	-1353.81	-1639.27	-1800.09	-1990.43	-2027.78	-2117.33	-2277.3	-2338.51	-2466.36	-2464.95	-2655.94	-2849.66	-2974.12	-2846.4	-3100.35	-3292.46	-3450.2	-4088.08	-4433.69
			-283.428	-339.894	-311.999	-435.531	-563.554	-784.699	-879.932	-1165.39	-1326.21	-1516.55	-1553.9	-1643.45	-1803.42	-1864.63	-1992.48	-1991.07	-2182.06	-2375.78	-2500.24	-2372.52	-2626.47	-2818.58	-2976.32	-3614.2	-3959.81
			-56.4661	-28.5712	-152.103	-280.127	-501.271	-596.505	-881.966	-1042.79	-1233.12	-1270.47	-1360.02	-1519.99	-1581.2	-1709.05	-1707.64	-1898.63	-2092.35	-2216.81	-2089.09	-2343.04	-2535.16	-2692.9	-3330.77	-3676.38
			27.8948	-95.6371	-223.66	-444.805	-540.039	-825.5	-986.32	-1176.65	-1214.01	-1303.56	-1463.52	-1524.74	-1652.59	-1651.18	-1842.16	-2035.89	-2160.35	-2032.62	-2286.58	-2478.69	-2636.43	-3274.3	-3619.92
			-123.532	-251.555	-472.7	-567.933	-853.395	-1014.21	-1204.55	-1241.9	-1331.45	-1491.42	-1552.63	-1680.48	-1679.07	-1870.06	-2063.78	-2188.24	-2060.52	-2314.47	-2506.58	-2664.33	-3302.2	-3647.81
			-128.023	-349.168	-444.401	-729.863	-890.683	-1081.02	-1118.37	-1207.92	-1367.88	-1429.1	-1556.95	-1555.54	-1746.52	-1940.25	-2064.71	-1936.99	-2190.94	-2383.05	-2540.79	-3178.66	-3524.28
			-221.145	-316.378	-601.84	-762.659	-952.994	-990.348	-1079.9	-1239.86	-1301.08	-1428.93	-1427.52	-1618.5	-1812.23	-1936.69	-1808.96	-2062.92	-2255.03	-2412.77	-3050.64	-3396.26
			-95.2334	-380.695	-541.514	-731.849	-769.203	-858.753	-1018.72	-1079.93	-1207.78	-1206.37	-1397.36	-1591.08	-1715.54	-1587.82	-1841.77	-2033.88	-2191.63	-2829.5	-3175.11
			-285.461	-446.281	-636.616	-673.969	-763.519	-923.483	-984.7	-1112.55	-1111.14	-1302.12	-1495.85	-1620.31	-1492.58	-1746.54	-1938.65	-2096.39	-2734.26	-3079.88
			-160.82	-351.154	-388.508	-478.058	-638.022	-699.238	-827.087	-825.676	-1016.66	-1210.39	-1334.85	-1207.12	-1461.08	-1653.19	-1810.93	-2448.8	-2794.42
			-190.335	-227.688	-317.238	-477.202	-538.419	-666.267	-664.857	-855.842	-1049.57	-1174.03	-1046.3	-1300.26	-1492.37	-1650.11	-2287.98	-2633.6
			-37.3538	-126.904	-286.868	-348.084	-475.933	-474.522	-665.507	-859.234	-983.693	-855.968	-1109.92	-1302.03	-1459.78	-2097.65	-2443.26
			-89.5498	-249.514	-310.73	-438.579	-437.168	-628.153	-821.881	-946.34	-818.614	-1072.57	-1264.68	-1422.42	-2060.29	-2405.91
			-159.964	-221.18	-349.029	-347.618	-538.603	-732.331	-856.79	-729.065	-983.019	-1175.13	-1332.87	-1970.74	-2316.36
			-61.2162	-189.065	-187.654	-378.639	-572.366	-696.826	-569.1	-823.055	-1015.17	-1172.91	-1810.78	-2156.4
			-127.849	-126.438	-317.423	-511.15	-635.609	-507.884	-761.839	-953.951	-1111.69	-1749.56	-2095.18
			1.41068	-189.574	-383.302	-507.761	-380.035	-633.99	-826.102	-983.844	-1621.71	-1967.33
			-190.985	-384.712	-509.171	-381.446	-635.401	-827.513	-985.254	-1623.12	-1968.74
			-193.727	-318.186	-190.461	-444.416	-636.528	-794.269	-1432.14	-1777.76
			-124.459	3.26611	-250.689	-442.8	-600.542	-1238.41	-1584.03
			127.725	-126.23	-318.341	-476.083	-1113.95	-1459.57
			-253.955	-446.067	-603.808	-1241.68	-1587.3
			-192.112	-349.853	-987.724	-1333.34
			-157.742	-795.612	-1141.23
			-637.871	-983.487
			-345.616
MT#7 (3)			-543.472	-1302.14	-2063.99	-2826.46	-3524.39	-4095.87	-4445
			-758.665	-1520.52	-2282.99	-2980.92	-3552.4	-3901.53
			-761.857	-1524.33	-2222.26	-2793.74	-3142.86
			-762.469	-1460.4	-2031.88	-2381.01
			-697.93	-1269.41	-1618.54
			-571.48	-920.607
			-349.127
MT#7 (4)			-454.591	-1146.96	-1557.05	-2413.21	-2952.92	-3462.06	-4382.54	-5145.95	-5493.58	-6321.12	-6699.33	-7399.45	-8193.04	-8223.8	-9620.46	-10194.9	-10669.7	-11557.4	-12541.4	-12637.1	-12795.2	-13620.9	-14128.8	-14605	-15081.3	-15779.8	-16478.4	-17113.2	-17780.1	-18383.7	-19304	-19716.9	-19939.2	-20764.5	-21177.8	-21748.8	-22415.5	-22796.5
			-692.371	-1102.45	-1958.62	-2498.33	-3007.47	-3927.94	-4691.36	-5038.98	-5866.53	-6244.73	-6944.86	-7738.45	-7769.21	-9165.87	-9740.32	-10215.1	-11102.8	-12086.8	-12182.5	-12340.7	-13166.3	-13674.2	-14150.4	-14626.7	-15325.2	-16023.8	-16658.7	-17325.5	-17929.1	-18849.4	-19262.3	-19484.6	-20309.9	-20723.3	-21294.3	-21960.9	-22341.9
			-410.083	-1266.25	-1805.96	-2315.1	-3235.57	-3998.99	-4346.61	-5174.16	-5552.36	-6252.49	-7046.08	-7076.84	-8473.5	-9047.95	-9522.74	-10410.4	-11394.4	-11490.2	-11648.3	-12473.9	-12981.8	-13458.1	-13934.3	-14632.8	-15331.4	-15966.3	-16633.2	-17236.7	-18157	-18569.9	-18792.3	-19617.6	-20030.9	-20601.9	-21268.5	-21649.5
			-856.163	-1395.88	-1905.02	-2825.49	-3588.9	-3936.53	-4764.08	-5142.28	-5842.41	-6635.99	-6666.76	-8063.41	-8637.87	-9112.66	-10000.3	-10984.4	-11080.1	-11238.2	-12063.9	-12571.7	-13048	-13524.2	-14222.7	-14921.3	-15556.2	-17780.1	-16826.6	-17747	-18159.8	-18382.2	-19207.5	-19620.8	-20191.8	-20858.5	-21239.5
			-539.712	-1048.85	-1969.33	-2732.74	-3080.37	-3907.91	-4286.12	-4986.24	-5779.83	-5810.59	-7207.25	-7781.71	-8256.49	-9144.18	-10128.2	-10223.9	-10382	-11207.7	-11715.6	-12191.8	-12668.1	-13366.6	-14065.2	-14700	-15366.9	-17929.1	-16890.8	-17303.6	-17526	-18351.3	-18764.6	-19335.6	-20002.3	-20383.3
			-509.14	-1429.61	-2193.03	-2540.66	-3368.2	-3746.4	-4446.53	-5240.12	-5270.88	-6667.54	-7241.99	-7716.78	-8604.47	-9588.49	-9684.22	-9842.33	-10668	-11175.9	-11652.1	-12128.4	-12826.9	-13525.5	-14160.3	-14827.2	-15430.8	-18157	-16763.9	-16986.3	-17811.6	-18224.9	-18795.9	-19462.6	-19843.6
			-920.475	-1683.89	-2031.52	-2859.06	-3237.26	-3937.39	-4730.98	-4761.74	-6158.4	-6732.85	-7207.64	-8095.33	-9079.35	-9175.08	-9333.19	-10158.8	-10666.7	-11143	-11619.2	-12317.7	-13016.3	-13651.2	-14318.1	-14921.6	-15841.9	-18159.8	-16477.2	-17302.5	-17715.8	-18286.8	-18953.4	-19334.4
			-763.414	-1111.04	-1938.59	-2316.79	-3016.92	-3810.5	-3841.27	-5237.92	-5812.38	-6287.17	-7174.86	-8158.88	-8254.6	-8412.71	-9238.36	-9746.25	-10222.5	-10698.7	-11397.2	-12095.8	-12730.7	-13397.6	-14001.2	-14921.5	-15334.3	-17526	-16382	-16795.3	-17366.3	-18033	-18414
			-347.627	-1175.17	-1553.38	-2253.5	-3047.09	-3077.85	-4474.51	-5048.97	-5523.75	-6411.44	-7395.46	-7491.19	-7649.3	-8474.95	-8982.84	-9459.09	-9935.33	-10633.8	-11332.4	-11967.3	-12634.2	-13237.7	-14158.1	-14570.9	-14793.3	-17811.6	-16031.9	-16602.9	-17269.6	-17650.6
			-827.545	-1205.75	-1905.88	-2699.46	-2730.23	-4126.88	-4701.34	-5176.12	-6063.82	-7047.83	-7143.56	-7301.67	-8127.32	-8635.21	-9111.46	-9587.71	-10286.2	-10984.8	-11619.7	-12286.5	-12890.1	-13810.4	-14223.3	-14445.7	-15270.9	-17715.8	-16255.3	-16921.9	-17302.9
			-378.204	-1078.33	-1871.92	-1902.68	-3299.34	-3873.79	-4348.58	-5236.27	-6220.29	-6316.02	-6474.13	-7299.78	-7807.66	-8283.91	-8760.16	-9458.66	-10157.3	-10792.1	-11459	-12062.6	-12982.9	-13395.7	-13618.1	-14443.4	-14856.7	-17366.3	-16094.4	-16475.4
			-700.128	-1493.71	-1524.48	-2921.13	-3495.59	-3970.38	-4858.07	-5842.09	-5937.81	-6095.92	-6921.57	-7429.46	-7905.71	-8381.96	-9080.46	-9779.05	-10413.9	-11080.8	-11684.4	-12604.7	-13017.5	-13239.9	-14065.2	-14478.5	-15049.5	-17269.6	-16097.2
			-793.585	-824.348	-2221.01	-2795.46	-3270.25	-4157.94	-5141.96	-5237.69	-5395.8	-6221.44	-6729.33	-7205.58	-7681.83	-8380.33	-9078.92	-9713.8	-10380.7	-10984.2	-11904.5	-12317.4	-12539.8	-13365.1	-13778.4	-14349.4	-15016	-17302.9
			-30.7635	-1427.42	-2001.88	-2476.66	-3364.35	-4348.37	-4444.1	-4602.21	-5427.86	-5935.75	-6412	-6888.25	-7586.74	-8285.33	-8920.21	-9587.08	-10190.7	-11111	-11523.8	-11746.2	-12571.5	-12984.8	-13555.8	-14222.5	-14603.5
			-1396.66	-1971.11	-2445.9	-3333.59	-4317.61	-4413.34	-4571.45	-5397.1	-5904.98	-6381.23	-6857.48	-7555.98	-8254.57	-8889.45	-9556.31	-10159.9	-11080.2	-11493.1	-11715.4	-12540.7	-12954	-13525	-14191.7	-14572.7
			-574.455	-1049.24	-1936.93	-2920.95	-3016.68	-3174.79	-4000.44	-4508.33	-4984.57	-5460.82	-6159.32	-6857.91	-7492.79	-8159.65	-8763.23	-9683.54	-10096.4	-10318.8	-11144.1	-11557.4	-12128.4	-12795	-13176
			-474.786	-1362.48	-2346.5	-2442.22	-2600.34	-3425.98	-3933.87	-4410.12	-4886.37	-5584.87	-6283.46	-6918.34	-7585.2	-8188.77	-9109.09	-9521.94	-9744.31	-10569.6	-10982.9	-11553.9	-12220.6	-12601.6
			-887.692	-1871.71	-1967.44	-2125.55	-2951.2	-3459.08	-3935.33	-4411.58	-5110.08	-5808.67	-6443.55	-7110.41	-7713.99	-8634.3	-9047.15	-9269.53	-10094.8	-10508.1	-11079.1	-11745.8	-12126.8
			-984.018	-1079.75	-1237.86	-2063.51	-2571.39	-3047.64	-3523.89	-4222.39	-4920.98	-5555.86	-6222.72	-6826.3	-7746.61	-8159.46	-8381.83	-9207.13	-9620.45	-10191.5	-10858.1	-11239.1
			-95.7274	-253.839	-1079.49	-1587.37	-2063.62	-2539.87	-3238.37	-3936.96	-4571.84	-5238.7	-5842.28	-6762.59	-7175.44	-7397.82	-8223.11	-8636.43	-9207.43	-9874.09	-10255.1
			-158.112	-983.76	-1491.65	-1967.9	-2444.15	-3142.64	-3841.23	-4476.11	-5142.98	-5746.55	-6666.86	-7079.71	-7302.09	-8127.39	-8540.71	-9111.7	-9778.36	-10159.4
			-825.648	-1333.54	-1809.78	-2286.03	-2984.53	-3683.12	-4318	-4984.86	-5588.44	-6508.75	-6921.6	-7143.98	-7969.27	-8382.6	-8953.59	-9620.25	-10001.2
			-507.888	-984.136	-1460.39	-2158.88	-2857.47	-3492.35	-4159.22	-4762.79	-5683.1	-6095.95	-6318.33	-7143.63	-7556.95	-8127.94	-8794.6	-9175.6
			-476.249	-952.498	-1651	-2349.59	-2984.46	-3651.33	-4254.9	-5175.21	-5588.07	-5810.44	-6635.74	-7049.06	-7620.06	-8286.71	-8667.71
			-476.249	-1174.75	-1873.34	-2508.22	-3175.08	-3778.65	-4698.97	-5111.82	-5334.19	-6159.49	-6572.81	-7143.81	-7810.47	-8191.47
			-698.499	-1397.09	-2031.97	-2698.83	-3302.41	-4222.72	-4635.57	-4857.94	-5683.24	-6096.56	-6667.56	-7334.22	-7715.22
			-698.59	-1333.47	-2000.33	-2603.91	-3524.22	-3937.07	-4159.45	-4984.74	-5398.06	-5969.06	-6635.72	-7016.72
			-634.878	-1301.74	-1905.32	-2825.63	-3238.48	-3460.86	-4286.15	-4699.47	-5270.47	-5937.13	-6318.13
			-666.863	-1270.44	-2190.75	-2603.6	-2825.98	-3651.27	-4064.6	-4635.59	-5302.25	-5683.25
			-603.575	-1523.89	-1936.74	-2159.11	-2984.41	-3397.73	-3968.73	-4635.39	-5016.39
			-920.311	-1333.16	-1555.54	-2380.84	-2794.16	-3365.15	-4031.81	-4412.81
			-412.852	-635.228	-1460.52	-1873.85	-2444.84	-3111.5	-3492.5
			-222.375	-1047.67	-1460.99	-2031.99	-2698.65	-3079.65
			-825.297	-1238.62	-1809.62	-2476.27	-2857.27
			-413.321	-984.318	-1650.98	-2031.98
			-570.998	-1237.65	-1618.65
			-666.657	-1047.66
			-381
MT#7 (5)			-362.006	-799.445	-1587.82	-1624.22	-2222.73	-2701.74	-2927.21	-3209.26
			-437.439	-1225.81	-1262.22	-1860.72	-2339.73	-2565.2	-2847.26
			-788.373	-824.778	-1423.28	-1902.29	-2127.76	-2409.82
			-36.4053	-634.909	-1113.92	-1339.39	-1621.45
			-598.504	-1077.51	-1302.98	-1585.04
			-479.01	-704.479	-986.537
			-225.469	-507.527
			-282.059
MT#8 (1)			-597.505	-581.181	-617.145	-827.939	-1334.79	-1623.31	-2243.41	-2734.8	-3060.47	-3223.77	-3716.23	-4498.51	-4960.56	-5679.67	-6101.75	-6761.69	-7300.74	-7402.45	-7763.64	-8353.12	-8986.05	-9622.31	-9887.93	-10453.2
			16.3234	-19.6407	-230.434	-737.282	-1025.8	-1645.91	-2137.29	-2462.97	-2626.27	-3118.73	-3901	-4363.06	-5082.16	-5504.25	-6164.19	-6703.24	-6804.94	-7166.13	-7755.62	-8388.55	-9024.8	-9290.43	-9855.69
			-35.9641	-246.757	-753.605	-1042.12	-1662.23	-2153.62	-2479.29	-2642.59	-3135.05	-3917.33	-4379.38	-5098.49	-5520.57	-6180.51	-6719.56	-6821.26	-7182.46	-7771.94	-8404.87	-9041.13	-9306.75	-9872.01
			-210.793	-717.641	-1006.16	-1626.26	-2117.65	-2443.33	-2606.63	-3099.09	-3881.36	-4343.42	-5062.52	-5484.61	-6144.55	-6683.6	-6785.3	-7146.49	-7735.98	-8368.91	-9005.16	-9270.79	-9836.05
			-506.847	-795.367	-1415.47	-1906.86	-2232.53	-2395.84	-2888.29	-3670.57	-4132.62	-4851.73	-5273.81	-5933.76	-6472.8	-6574.51	-6935.7	-7525.18	-8158.11	-8794.37	-9059.99	-9625.25
			-288.519	-908.624	-1400.01	-1725.69	-1888.99	-2381.45	-3163.72	-3625.78	-4344.88	-4766.97	-5426.91	-5965.96	-6067.66	-6428.85	-7018.34	-7651.26	-8287.52	-8553.15	-9118.41
			-620.105	-1111.49	-1437.17	-1600.47	-2092.93	-2875.2	-3337.26	-4056.36	-4478.45	-5138.39	-5677.44	-5779.14	-6140.33	-6729.82	-7362.75	-7999	-8264.63	-8829.89
			-491.386	-817.063	-980.364	-1472.82	-2255.1	-2717.15	-3436.26	-3858.34	-4518.28	-5057.33	-5159.04	-5520.23	-6109.71	-6742.64	-7378.9	-7644.52	-8209.78
			-325.676	-488.978	-981.436	-1763.71	-2225.76	-2944.87	-3366.96	-4026.9	-4565.95	-4667.65	-5028.84	-5618.33	-6251.25	-6887.51	-7153.14	-7718.4
			-163.301	-655.76	-1438.03	-1900.09	-2619.2	-3041.28	-3701.22	-4240.27	-4341.97	-4703.17	-5292.65	-5925.58	-6561.83	-6827.46	-7392.72
			-492.458	-1274.73	-1736.79	-2455.89	-2877.98	-3537.92	-4076.97	-4178.67	-4539.86	-5129.35	-5762.28	-6398.53	-6664.16	-7229.42
			-782.274	-1244.33	-1963.44	-2385.52	-3045.46	-3584.51	-3686.21	-4047.41	-4636.89	-5269.82	-5906.07	-6171.7	-6736.96
			-462.055	-1181.16	-1603.25	-2263.19	-2802.24	-2903.94	-3265.13	-3854.62	-4487.54	-5123.8	-5389.43	-5954.69
			-719.106	-1141.19	-1801.13	-2340.18	-2441.88	-2803.08	-3392.56	-4025.49	-4661.74	-4927.37	-5492.63
			-422.084	-1082.03	-1621.08	-1722.78	-2083.97	-2673.46	-3306.38	-3942.64	-4208.27	-4773.52
			-659.943	-1198.99	-1300.69	-1661.89	-2251.37	-2884.3	-3520.55	-3786.18	-4351.44
			-539.048	-640.751	-1001.94	-1591.43	-2224.36	-2860.61	-3126.24	-3691.5
			-101.703	-462.895	-1052.38	-1685.31	-2321.56	-2587.19	-3152.45
			-361.192	-950.677	-1583.6	-2219.86	-2485.49	-3050.75
			-589.485	-1222.41	-1858.67	-2124.3	-2689.55
			-632.928	-1269.18	-1534.81	-2100.07
			-636.255	-901.882	-1467.14
			-265.627	-830.887
			-565.26
MT#8 (3)			-59.9881	-21.209	-161.239	-179.605	-416.969	-349.141	-596.083	-842.706	-1044.96	-1263.36	-1143.79	-1344.22	-1617.61	-1874.7
			38.7791	-101.251	-119.617	-356.981	-289.153	-536.095	-782.717	-984.967	-1203.38	-1083.8	-1284.23	-1557.62	-1814.71
			-140.03	-158.396	-395.76	-327.932	-574.874	-821.497	-1023.75	-1242.15	-1122.58	-1323.01	-1596.4	-1853.49
			-18.3657	-255.73	-187.902	-434.843	-681.466	-883.716	-1102.12	-982.547	-1182.98	-1456.37	-1713.46
			-237.364	-169.536	-416.478	-663.1	-865.35	-1083.76	-964.182	-1164.61	-1438	-1695.1
			67.8284	-179.113	-425.736	-627.986	-846.394	-726.817	-927.25	-1200.64	-1457.73
			-246.942	-493.565	-695.814	-914.222	-794.646	-995.078	-1268.46	-1525.56
			-246.623	-448.872	-667.28	-547.704	-748.136	-1021.52	-1278.62
			-202.25	-420.658	-301.081	-501.513	-774.9	-1032
			-218.408	-98.8316	-299.264	-572.65	-829.746
			119.576	-80.8559	-354.242	-611.338
			-200.432	-473.819	-730.915
			-273.386	-530.482
			-257.096
MT#9 (1)			114.049	241.419	362.394	318.208	383.34	508	635.354	552.04	593.088	571.5	594.216	619.735	617.193	638.167	722.505	698.822	741.221	868.177	825.5	846.975	973.94	846.975	996.942	932.378	1016.88	977.387	1100.91	973.94	1100.91	1016.88	956.259	998.518	1081.37	931.418	827.939	931.659	808.866	826.583	931.418	1016.22	954.614
			127.37	248.345	204.159	269.291	393.951	521.305	437.991	479.039	457.451	480.167	505.686	503.144	524.118	608.456	584.773	627.173	754.128	711.451	732.926	859.891	732.926	882.893	818.329	902.831	863.338	986.864	859.891	986.864	902.831	842.21	884.469	967.317	817.369	713.89	817.611	694.817	712.534	817.369	902.172	840.565
			120.975	76.7888	141.921	266.581	393.935	310.621	351.67	330.081	352.797	378.316	375.774	396.748	481.086	457.403	499.803	626.758	584.081	605.556	732.521	605.556	755.524	690.959	775.461	735.968	859.494	732.521	859.494	775.461	714.84	757.099	839.947	689.999	586.52	690.241	567.447	585.164	689.999	774.803	713.196
			-44.1865	20.9458	145.606	272.96	189.646	230.694	209.106	231.822	257.34	254.799	275.773	360.111	336.428	378.827	505.783	463.106	484.58	611.546	484.58	634.548	569.984	654.486	614.993	738.519	611.546	1100.91	654.486	593.865	636.124	718.972	569.024	465.545	569.265	446.472	464.188	569.024	653.827	592.22
			65.1324	189.792	317.146	233.833	274.881	253.292	276.008	301.527	298.986	319.96	404.297	380.614	423.014	549.97	507.292	528.767	655.732	528.767	678.735	614.17	698.672	659.179	782.706	655.732	782.706	902.831	638.052	680.31	763.158	613.21	509.731	613.452	490.658	508.375	613.21	698.014	636.407
			124.66	252.014	168.7	209.748	188.16	210.876	236.395	233.853	254.827	339.165	315.482	357.882	484.837	442.16	463.635	590.6	463.635	613.602	549.038	633.54	594.047	717.573	590.6	717.573	633.54	714.84	615.178	698.026	548.078	444.599	548.319	425.526	443.243	548.078	632.881	571.274
			127.354	44.0403	85.0883	63.5	86.2159	111.735	109.193	130.167	214.505	190.822	233.221	360.177	317.5	338.975	465.94	338.975	488.942	424.378	508.88	469.387	592.913	465.94	592.913	508.88	448.259	636.124	573.366	423.418	319.939	423.659	300.866	318.583	423.418	508.221	446.614
			-83.3138	-42.2658	-63.8541	-41.1382	-15.6195	-18.1608	2.81301	87.1508	63.4678	105.867	232.823	190.146	211.62	338.586	211.62	361.588	297.024	381.526	342.033	465.559	338.586	465.559	381.526	320.905	363.164	763.158	296.064	192.585	296.305	173.512	191.228	296.064	380.867	319.26
			41.048	19.4597	42.1755	67.6943	65.153	86.1268	170.465	146.782	189.181	316.137	273.46	294.934	421.9	294.934	444.902	380.337	464.839	425.346	548.873	421.9	548.873	464.839	404.219	446.477	529.326	548.078	275.898	379.619	256.826	274.542	379.378	464.181	402.574
			-21.5883	1.12752	26.6462	24.105	45.0788	129.417	105.734	148.133	275.089	232.412	253.886	380.852	253.886	403.854	339.289	423.791	384.298	507.825	380.852	507.825	423.791	363.171	405.429	488.278	338.33	319.939	338.571	215.777	233.494	338.33	423.133	361.526
			22.7159	48.2346	45.6933	66.6671	151.005	127.322	169.721	296.677	254	275.475	402.44	275.475	425.442	360.878	445.38	405.887	529.413	402.44	529.413	445.38	384.759	427.018	509.866	359.918	256.439	296.305	237.366	255.083	359.918	444.721	383.114
			25.5187	22.9774	43.9512	128.289	104.606	147.006	273.961	231.284	252.759	379.724	252.759	402.727	338.162	422.664	383.171	506.697	379.724	506.697	422.664	362.043	404.302	487.15	337.202	233.723	337.444	256.826	232.367	337.202	422.005	360.398
			-2.54127	18.4325	102.77	79.0874	121.487	248.443	205.765	227.24	354.205	227.24	377.208	312.643	397.145	357.652	481.179	354.205	481.179	397.145	336.525	378.783	461.631	311.683	208.204	311.925	189.131	233.494	311.683	396.487	334.88
			20.9738	105.312	81.6286	124.028	250.984	208.307	229.781	356.747	229.781	379.749	315.184	399.687	360.193	483.72	356.747	483.72	399.687	339.066	381.324	464.173	314.225	210.745	314.466	191.673	209.389	359.918	399.028	337.421
			84.3378	60.6548	103.054	230.01	187.333	208.807	335.773	208.807	358.775	294.211	378.713	339.22	462.746	335.773	462.746	378.713	318.092	360.351	443.199	293.251	189.772	293.492	170.699	188.415	293.251	422.005	316.447
			-23.683	18.7166	145.672	102.995	124.47	251.435	124.47	274.437	209.873	294.375	254.882	378.408	251.435	378.408	294.375	233.754	276.013	358.861	208.913	105.434	209.155	86.361	104.078	208.913	293.716	334.88
			42.3996	169.355	126.678	148.153	275.118	148.153	298.12	233.556	318.058	278.565	402.091	275.118	402.091	318.058	257.437	299.696	382.544	232.596	129.117	232.838	110.044	127.761	232.596	317.399	255.792
			126.956	84.2785	105.753	232.718	105.753	255.721	191.156	275.658	236.165	359.692	232.718	359.692	275.658	215.038	257.296	340.145	190.197	86.7172	190.438	67.6443	85.3611	190.197	275	213.393
			-42.6771	-21.2025	105.763	-21.2025	128.765	64.2005	148.703	109.21	232.736	105.763	232.736	148.703	88.0822	130.341	213.189	63.2409	-40.2384	63.4823	-59.3113	-41.5945	63.2409	148.044	86.4372
			21.4746	148.44	21.4746	171.442	106.878	191.38	151.887	275.413	148.44	275.413	191.38	130.759	173.018	255.866	105.918	2.43871	106.159	-16.6342	1.08259	105.918	190.721	129.114
			126.965	0	149.968	85.403	169.905	130.412	253.939	126.965	253.939	169.905	109.285	151.543	234.391	84.4434	-19.0359	84.6849	-38.1088	-20.392	84.4434	169.247	107.64
			-126.965	23.0024	-41.5623	42.9398	3.44678	126.973	0	126.973	42.9398	-17.6806	24.5777	107.426	-42.522	-146.001	-42.2805	-165.074	-147.357	-42.522	42.2814	-19.3256
			149.968	85.403	169.905	130.412	253.939	126.965	253.939	169.905	109.285	151.543	234.391	84.4434	-19.0359	84.6849	-38.1088	-20.392	84.4434	169.247	107.64
			-64.5647	19.9374	-19.5556	103.971	-23.0024	103.971	19.9374	-40.6831	1.57526	84.4237	-65.5244	-169.004	-65.2829	-188.077	-170.36	-65.5244	19.279	-42.328
			84.5022	45.0091	168.536	41.5623	168.536	84.5022	23.8817	66.14	148.988	-0.959616	-104.439	-0.718176	-123.512	-105.795	-0.959616	83.8437	22.2367
			-39.4931	84.0335	-42.9398	84.0335	0	-60.6205	-18.3622	64.4862	-85.4618	-188.941	-85.2204	-208.014	-190.297	-85.4618	-0.658456	-62.2655
			123.527	-3.44678	123.527	39.4931	-21.1274	21.1309	103.979	-45.9687	-149.448	-45.7273	-168.521	-150.804	-45.9687	38.8346	-22.7724
			-126.973	0	-84.0335	-144.654	-102.396	-19.5473	-169.495	-272.975	-169.254	-292.047	-274.331	-169.495	-84.692	-146.299
			126.973	42.9398	-17.6806	24.5777	107.426	-42.522	-146.001	-42.2805	-165.074	-147.357	-42.522	42.2814	-19.3256
			-84.0335	-144.654	-102.396	-19.5473	-169.495	-272.975	-169.254	-292.047	-274.331	-169.495	-84.692	-146.299
			-60.6205	-18.3622	64.4862	-85.4618	-188.941	-85.2204	-208.014	-190.297	-85.4618	-0.658456	-62.2655
			42.2583	125.107	-24.8413	-128.321	-24.5999	-147.393	-129.677	-24.8413	59.962	-1.64499
			82.8484	-67.0996	-170.579	-66.8582	-189.652	-171.935	-67.0996	17.7037	-43.9033
			-149.948	-253.427	-149.707	-272.5	-254.783	-149.948	-65.1447	-126.752
			-103.479	0.24144	-122.552	-104.835	0	84.8033	23.1963
			103.721	-19.0729	-1.35612	103.479	188.283	126.676
			-122.794	-105.077	-0.24144	84.5619	22.9549
			17.7168	122.552	207.356	145.748
			104.835	189.639	128.032
			84.8033	23.1963
			-61.607
MT#9 (2)			-550.291	-1185.48	-1503.39	-1884.86	-2625.05	-3116.1	-4108.25	-4912.94	-5463.01	-5736.36
			-635.187	-953.095	-1334.57	-2074.76	-2565.81	-3557.96	-4362.65	-4912.72	-5186.07
			-317.907	-699.382	-1439.57	-1930.62	-2922.78	-3727.46	-4277.53	-4550.89
			-381.475	-1121.66	-1612.72	-2604.87	-3409.56	-3959.62	-4232.98
			-740.189	-1231.24	-2223.39	-3028.08	-3578.15	-3851.5
			-491.052	-1483.2	-2287.89	-2837.96	-3111.32
			-992.152	-1796.84	-2346.91	-2620.26
			-804.687	-1354.75	-1628.11
			-550.066	-823.424
			-273.358
MT#9 (3)			-719.709	-995.017	-1735.71	-2139.46	-2625.05	-2964.5	-3323.28	-3304.44
			-275.308	-1016	-1419.75	-1905.34	-2244.79	-2603.57	-2584.73
			-740.692	-1144.45	-1630.03	-1969.48	-2328.26	-2309.42
			-403.755	-889.341	-1228.79	-1587.57	-1568.73
			-485.586	-825.034	-1183.81	-1164.98
			-339.448	-698.226	-679.392
			-358.778	-339.944
			18.8345
MT#10 (1)			-508.991	-1208.17	-1905.26	-2413.21	-3016.92	-3557.28	-4192.08	-4889.6	-5175.64	-5937.59	-6445.25	-6985.65	-7620.26	-8191.75	-8826.5	-9207.99	-9843.32	-10224.7	-10827.9	-11590.9	-12161.3	-12573.6
			-699.179	-1396.27	-1904.22	-2507.93	-3048.28	-3683.09	-4380.61	-4666.65	-5428.6	-5936.26	-6476.66	-7111.27	-7682.75	-8317.51	-8699	-9334.33	-9715.74	-10318.9	-11081.9	-11652.3	-12064.7
			-697.095	-1205.04	-1808.75	-2349.11	-2983.91	-3681.43	-3967.47	-4729.42	-5237.08	-5777.48	-6412.09	-6983.58	-7618.33	-7999.82	-8635.15	-9016.56	-9619.74	-10382.7	-10953.1	-11365.5
			-507.944	-1111.65	-1652.01	-2286.82	-2984.34	-3270.37	-4032.32	-4539.99	-5080.38	-5715	-6286.48	-6921.24	-7302.73	-7938.05	-8319.47	-8922.65	-9685.62	-10256	-10668.4
			-603.709	-1144.07	-1778.87	-2476.39	-2762.43	-3524.38	-4032.04	-4572.44	-5207.06	-5778.54	-6413.29	-6794.78	-7430.11	-7811.52	-8414.7	-9177.67	-9748.08	-10160.4
			-540.357	-1175.16	-1872.68	-2158.72	-2920.67	-3428.33	-3968.73	-4603.35	-5174.83	-5809.58	-6191.07	-6826.4	-7207.81	-7811	-8573.96	-9144.37	-9556.72
			-634.807	-1332.33	-1618.36	-2380.31	-2887.97	-3428.37	-4062.99	-4634.47	-5269.22	-5650.72	-6286.04	-6667.46	-7270.64	-8033.61	-8604.01	-9016.37
			-697.521	-983.557	-1745.51	-2253.17	-2793.57	-3428.18	-3999.66	-4634.42	-5015.91	-5651.24	-6032.65	-6635.83	-7398.8	-7969.2	-8381.56
			-286.036	-1047.99	-1555.65	-2096.05	-2730.66	-3302.14	-3936.9	-4318.39	-4953.72	-5335.13	-5938.31	-6701.28	-7271.68	-7684.04
			-761.95	-1269.61	-1810.01	-2444.63	-3016.11	-3650.86	-4032.35	-4667.68	-5049.09	-5652.27	-6415.24	-6985.65	-7398
			-507.66	-1048.06	-1682.68	-2254.16	-2888.91	-3270.4	-3905.73	-4287.14	-4890.32	-5653.29	-6223.7	-6636.05
			-540.399	-1175.01	-1746.5	-2381.25	-2762.74	-3398.07	-3779.48	-4382.66	-5145.63	-5716.04	-6128.39
			-634.615	-1206.1	-1840.85	-2222.34	-2857.67	-3239.08	-3842.26	-4605.23	-5175.64	-5587.99
			-571.482	-1206.24	-1587.73	-2223.05	-2604.47	-3207.65	-3970.62	-4541.02	-4953.38
			-634.754	-1016.25	-1651.57	-2032.99	-2636.17	-3399.13	-3969.54	-4381.9
			-381.493	-1016.82	-1398.23	-2001.41	-2764.38	-3334.79	-3747.14
			-635.327	-1016.74	-1619.92	-2382.89	-2953.29	-3365.65
			-381.413	-984.594	-1747.56	-2317.97	-2730.32
			-603.181	-1366.15	-1936.55	-2348.91
			-762.967	-1333.37	-1745.73
			-570.405	-982.76
			-412.355
MT#10 (2)			-319.084	-730.94	-1111.25	-1556.07	-2032.25	-2604.27	-3018.92	-3660.07	-4266.33	-4872.67	-5284.25	-5803.65	-6341.26	-6811.17	-7517.24	-7765.78	-8460.76	-9126.4
			-411.856	-792.166	-1236.99	-1713.16	-2285.19	-2699.84	-3340.99	-3947.25	-4553.58	-4965.17	-5484.57	-6022.18	-6492.09	-7198.16	-7446.7	-8141.68	-8807.32
			-380.31	-825.134	-1301.31	-1873.33	-2287.98	-2929.13	-3535.39	-4141.73	-4553.31	-5072.71	-5610.32	-6080.23	-6786.3	-7034.84	-7729.82	-8395.46
			-444.824	-920.998	-1493.02	-1907.67	-2548.82	-3155.08	-3761.42	-4173	-4692.4	-5230.01	-5699.92	-6405.99	-6654.53	-7349.51	-8015.15
			-476.174	-1048.2	-1462.85	-2104	-2710.26	-3316.59	-3728.18	-4247.58	-4785.19	-5255.1	-5961.17	-6209.71	-6904.69	-7570.33
			-572.026	-986.674	-1627.83	-2234.08	-2840.42	-3252.01	-3771.41	-4309.01	-4778.92	-5485	-5733.53	-6428.52	-7094.15
			-414.648	-1055.8	-1662.06	-2268.39	-2679.98	-3199.38	-3736.99	-4206.9	-4912.97	-5161.51	-5856.49	-6522.13
			-641.152	-1247.41	-1853.75	-2265.33	-2784.73	-3322.34	-3792.25	-4498.32	-4746.86	-5441.84	-6107.48
			-606.256	-1212.59	-1624.18	-2143.58	-2681.19	-3151.1	-3857.17	-4105.71	-4800.69	-5466.33
			-606.338	-1017.92	-1537.32	-2074.93	-2544.84	-3250.91	-3499.45	-4194.43	-4860.07
			-411.585	-930.985	-1468.59	-1938.5	-2644.58	-2893.11	-3588.1	-4253.73
			-519.4	-1057.01	-1526.92	-2232.99	-2481.53	-3176.51	-3842.15
			-537.609	-1007.52	-1713.59	-1962.13	-2657.11	-3322.75
			-469.908	-1175.98	-1424.52	-2119.5	-2785.14
			-706.074	-954.609	-1649.59	-2315.23
			-248.536	-943.52	-1609.16
			-694.984	-1360.62
			-665.635
MT#10 (3)			-44.9013	-200.805	-830.977	-1239.88	-1366.73	-1365.62	-1558.66	-1936.75	-2190.98	-2571.95	-2952.92	-3175	-3206.91	-3683.55
			-155.903	-786.076	-1194.98	-1321.82	-1320.72	-1513.76	-1891.85	-2146.08	-2527.04	-2908.02	-3130.1	-3162.01	-3638.65
			-630.172	-1039.07	-1165.92	-1164.81	-1357.86	-1735.95	-1990.18	-2371.14	-2752.12	-2974.2	-3006.1	-3482.74
			-408.9	-535.749	-534.642	-727.686	-1105.77	-1360	-1740.97	-2121.94	-2344.02	-2375.93	-2852.57
			-126.849	-125.742	-318.786	-696.873	-951.103	-1332.07	-1713.04	-1935.12	-1967.03	-2443.67
			1.10681	-191.937	-570.024	-824.254	-1205.22	-1586.19	-1808.27	-1840.18	-2316.82
			-193.044	-571.131	-825.361	-1206.33	-1587.3	-1809.38	-1841.29	-2317.93
			-378.087	-632.317	-1013.28	-1394.26	-1616.34	-1648.24	-2124.88
			-254.23	-635.196	-1016.17	-1238.25	-1270.16	-1746.8
			-380.966	-761.941	-984.02	-1015.93	-1492.57
			-380.975	-603.054	-634.961	-1111.6
			-222.079	-253.986	-730.627
			-31.9072	-508.547
			-476.64
MT#11 (1)			-554.49	-1248.38	-1644.27	-2192.36	-2752.2	-3172.62	-3657.87	-4065.98
			-693.895	-1089.78	-1637.87	-2197.71	-2618.13	-3103.38	-3511.49
			-395.885	-943.975	-1503.81	-1924.23	-2409.49	-2817.6
			-548.09	-1107.93	-1528.35	-2013.6	-2421.71
			-559.836	-980.258	-1465.51	-1873.62
			-420.422	-905.674	-1313.79
			-485.252	-893.366
			-408.114
MT#11 (2)			-543.472	-1016.5	-1746.54	-2416.34	-3240.99	-4130.55	-4901.96	-5634.89	-6496.89	-7209.42	-7741.34
			-473.024	-1203.07	-1872.87	-2697.52	-3587.08	-4358.48	-5091.41	-5953.42	-6665.95	-7197.87
			-730.043	-1399.84	-2224.49	-3114.06	-3885.46	-4618.39	-5480.4	-6192.92	-6724.84
			-669.801	-1494.45	-2384.01	-3155.42	-3888.35	-4750.35	-5462.88	-5994.8
			-824.649	-1714.21	-2485.62	-3218.55	-4080.55	-4793.08	-5325
			-889.563	-1660.97	-2393.9	-3255.9	-3968.43	-4500.35
			-771.406	-1504.34	-2366.34	-3078.87	-3610.79
			-732.93	-1594.93	-2307.46	-2839.38
			-862.004	-1574.53	-2106.45
			-712.527	-1244.45
			-531.92
MT#12 (2)			-720.958	-1338.68	-1913	-2557.52	-2688.4	-3309.81	-3696.32	-4262.4	-4651.69	-5359	-5881.13	-6367.05	-6741.77	-7157.42	-7538.26	-7959.72	-8509.42	-8932.29	-9441.15	-10247.9	-10853.5
			-617.726	-1192.04	-1836.56	-1967.44	-2588.85	-2975.36	-3541.44	-3930.73	-4638.04	-5160.17	-5646.09	-6020.82	-6436.46	-6817.3	-7238.76	-7788.46	-8211.33	-8720.19	-9526.9	-10132.5
			-574.316	-1218.84	-1349.71	-1971.12	-2357.63	-2923.72	-3313.01	-4020.32	-4542.45	-5028.36	-5403.09	-5818.73	-6199.58	-6621.04	-7170.74	-7593.61	-8102.46	-8909.17	-9514.8
			-644.522	-775.398	-1396.81	-1783.32	-2349.4	-2738.69	-3446	-3968.13	-4454.05	-4828.77	-5244.42	-5625.26	-6046.72	-6596.42	-7019.29	-7528.15	-8334.86	-8940.48
			-130.876	-752.284	-1138.8	-1704.88	-2094.17	-2801.48	-3323.61	-3809.52	-4184.25	-4599.9	-4980.74	-5402.2	-5951.9	-6374.77	-6883.62	-7690.34	-8295.96
			-621.408	-1007.92	-1574	-1963.29	-2670.6	-3192.73	-3678.65	-4053.38	-4469.02	-4849.86	-5271.32	-5821.02	-6243.89	-6752.75	-7559.46	-8165.08
			-386.512	-952.597	-1341.89	-2049.19	-2571.32	-3057.24	-3431.97	-3847.61	-4228.46	-4649.92	-5199.61	-5622.49	-6131.34	-6938.05	-7543.67
			-566.085	-955.375	-1662.68	-2184.81	-2670.73	-3045.46	-3461.1	-3841.94	-4263.4	-4813.1	-5235.97	-5744.83	-6551.54	-7157.16
			-389.29	-1096.6	-1618.73	-2104.64	-2479.37	-2895.02	-3275.86	-3697.32	-4247.02	-4669.89	-5178.74	-5985.45	-6591.08
			-707.308	-1229.44	-1715.35	-2090.08	-2505.73	-2886.57	-3308.03	-3857.73	-4280.6	-4789.45	-5596.16	-6201.79
			-522.129	-1008.04	-1382.77	-1798.42	-2179.26	-2600.72	-3150.42	-3573.29	-4082.14	-4888.86	-5494.48
			-485.916	-860.645	-1276.29	-1657.13	-2078.59	-2628.29	-3051.16	-3560.02	-4366.73	-4972.35
			-374.729	-790.374	-1171.22	-1592.68	-2142.38	-2565.25	-3074.1	-3880.81	-4486.43
			-415.645	-796.487	-1217.95	-1767.65	-2190.52	-2699.37	-3506.08	-4111.71
			-380.842	-802.303	-1352	-1774.87	-2283.73	-3090.44	-3696.06
			-421.461	-971.159	-1394.03	-1902.88	-2709.6	-3315.22
			-549.698	-972.569	-1481.42	-2288.14	-2893.76
			-422.871	-931.725	-1738.44	-2344.06
			-508.854	-1315.57	-1921.19
			-806.712	-1412.33
			-605.623
MT#12 (3)			-594.225	-974.632	-2060.04
			-380.408	-1465.81
			-1085.4
MT#14 (1)			-63.5	0	-63.5	-44.9013	114.476	130.909	95.25	158.75	100.402	100.402	114.476	158.75	63.5	190.5	271.272	203.299	200.805	114.476	158.75	161.894	350.69	312.701	271.272	234.259	91.0315	156.204	53.9979	185.133	224.506	241.801	203.533	307.14	201.317	269.79	413.969	290.616	224.506	353.242	228.473	350.69	375.357	295.187	382.508	388.333	456.147	353.242	434.087
			63.5	0	18.5987	177.976	194.409	158.75	222.25	163.902	163.902	177.976	222.25	127	254	334.772	266.799	264.305	177.976	222.25	225.394	414.19	376.201	334.772	297.759	154.531	219.704	117.498	248.633	288.006	305.301	267.033	370.64	264.817	333.29	477.469	354.116	288.006	416.742	291.973	414.19	438.857	358.687	446.008	451.833	519.647	416.742	497.587	561.071
			-63.5	-44.9013	114.476	130.909	95.25	158.75	100.402	100.402	114.476	158.75	63.5	190.5	271.272	203.299	200.805	114.476	158.75	161.894	350.69	312.701	271.272	234.259	91.0315	156.204	53.9979	185.133	224.506	241.801	203.533	307.14	201.317	269.79	413.969	290.616	224.506	353.242	228.473	350.69	375.357	295.187	382.508	388.333	456.147	353.242	434.087	497.571	434.087
			18.5987	177.976	194.409	158.75	222.25	163.902	163.902	177.976	222.25	127	254	334.772	266.799	264.305	177.976	222.25	225.394	414.19	376.201	334.772	297.759	154.531	219.704	117.498	248.633	224.506	305.301	267.033	370.64	264.817	333.29	477.469	354.116	288.006	416.742	291.973	414.19	438.857	358.687	446.008	451.833	519.647	416.742	497.587	561.071	497.587	561.071
			159.378	175.81	140.151	203.651	145.304	145.304	159.378	203.651	108.401	235.401	316.173	248.2	245.706	159.378	203.651	206.795	395.591	357.603	316.173	279.16	135.933	201.105	98.8991	230.034	269.408	305.301	248.434	352.041	246.218	314.691	458.871	335.517	269.408	398.144	273.374	395.591	420.259	340.088	427.409	433.234	501.049	398.144	478.988	542.472	478.988	542.472	478.988
			16.4324	-19.2263	44.2737	-14.0739	-14.0739	0	44.2737	-50.9763	76.0237	156.796	88.8229	86.3284	0	44.2737	47.4176	236.214	198.225	156.796	119.782	-23.4448	41.7274	-60.4784	70.6565	110.03	127.325	203.533	192.664	86.8409	155.314	299.493	176.14	110.03	238.766	113.996	236.214	260.881	180.71	268.032	273.857	341.671	238.766	319.611	383.094	319.611	383.094	319.611	406.762
			-35.6586	27.8414	-30.5063	-30.5063	-16.4324	27.8414	-67.4086	59.5914	140.364	72.3906	69.896	-16.4324	27.8414	30.9853	219.782	181.793	140.364	103.35	-39.8772	25.2951	-76.9107	54.2241	93.5978	110.892	72.6241	370.64	70.4086	138.881	283.061	159.707	93.5978	222.334	97.564	219.782	244.449	164.278	251.599	257.424	325.239	222.334	303.178	366.662	303.178	366.662	303.178	390.33	346.399
			63.5	5.15232	5.15232	19.2263	63.5	-31.75	95.25	176.022	108.049	105.555	19.2263	63.5	66.6439	255.44	217.451	176.022	139.009	-4.21855	60.9537	-41.2521	89.8827	129.256	146.551	108.283	211.89	246.218	174.54	318.719	195.366	129.256	257.992	133.223	255.44	280.107	199.937	287.258	293.083	360.897	257.992	338.837	402.321	338.837	402.321	338.837	425.988	382.057	354.064
			-58.3477	-58.3477	-44.2737	0	-95.25	31.75	112.522	44.5492	42.0546	-44.2737	0	3.14387	191.94	153.951	112.522	75.5087	-67.7185	-2.5463	-104.752	26.3827	65.7564	83.0508	44.7827	148.39	42.5672	155.314	255.219	131.866	65.7564	194.492	69.7226	191.94	216.607	136.437	223.758	229.583	297.397	194.492	275.337	338.821	275.337	338.821	275.337	362.488	318.557	290.564	323.221
			0	14.0739	58.3477	-36.9023	90.0977	170.87	102.897	100.402	14.0739	58.3477	61.4916	250.288	212.299	170.87	133.856	-9.37086	55.8014	-46.4045	84.7304	124.104	141.398	103.13	206.738	100.915	169.388	283.061	190.214	124.104	252.84	128.07	250.288	274.955	194.784	282.106	287.931	355.745	252.84	333.685	397.168	333.685	397.168	333.685	420.836	376.905	348.912	381.569	418.246
			14.0739	58.3477	-36.9023	90.0977	170.87	102.897	100.402	14.0739	58.3477	61.4916	250.288	212.299	170.87	133.856	-9.37086	55.8014	-46.4045	84.7304	124.104	141.398	103.13	206.738	100.915	169.388	313.567	195.366	124.104	252.84	128.07	250.288	274.955	194.784	282.106	287.931	355.745	252.84	333.685	397.168	333.685	397.168	333.685	420.836	376.905	348.912	381.569	418.246	333.685
			44.2737	-50.9763	76.0237	156.796	88.8229	86.3284	0	44.2737	47.4176	236.214	198.225	156.796	119.782	-23.4448	41.7274	-60.4784	70.6565	110.03	127.325	89.0564	192.664	86.8409	155.314	299.493	176.14	65.7564	238.766	113.996	236.214	260.881	180.71	268.032	273.857	341.671	238.766	319.611	383.094	319.611	383.094	319.611	406.762	362.831	334.838	367.495	404.172	319.611	355.317
			-95.25	31.75	112.522	44.5492	42.0546	-44.2737	0	3.14387	191.94	153.951	112.522	75.5087	-67.7185	-2.5463	-104.752	26.3827	65.7564	83.0508	44.7827	148.39	42.5672	111.04	255.219	131.866	65.7564	252.84	69.7226	191.94	216.607	136.437	223.758	229.583	297.397	194.492	275.337	338.821	275.337	338.821	275.337	362.488	318.557	290.564	323.221	359.898	275.337	311.043	276.369
			127	207.772	139.799	137.305	50.9763	95.25	98.3939	287.19	249.201	207.772	170.759	27.5315	92.7037	-9.50214	121.633	161.006	178.301	140.033	243.64	137.817	206.29	350.469	227.116	161.006	289.742	128.07	287.19	311.857	231.687	319.008	324.833	392.647	289.742	370.587	434.071	370.587	434.071	370.587	457.738	413.807	385.814	418.471	455.148	370.587	406.293	371.619	217.666
			80.7721	12.7992	10.3046	-76.0237	-31.75	-28.6061	160.19	122.201	80.7721	43.7587	-99.4685	-34.2963	-136.502	-5.36728	34.0064	51.3008	13.0327	116.64	10.8172	79.2899	223.469	100.116	34.0064	162.742	37.9726	236.214	184.857	104.687	192.008	197.833	265.647	162.742	243.587	307.071	243.587	307.071	243.587	330.738	286.807	258.814	291.471	328.148	243.587	279.293	244.619	90.6663	222.385
			-67.9729	-70.4675	-156.796	-112.522	-109.378	79.4181	41.4291	0	-37.0134	-180.241	-115.068	-217.274	-86.1394	-46.7657	-29.4713	-67.7395	35.8678	-69.955	-1.48221	142.697	19.344	-46.7657	81.9703	-42.7995	79.4181	216.607	23.9145	111.236	117.061	184.875	81.9703	162.815	226.299	162.815	226.299	162.815	249.966	206.035	178.042	210.699	247.376	162.815	198.521	163.847	9.89421	141.612
			-2.49456	-88.8229	-44.5492	-41.4053	147.391	109.402	67.9729	30.9595	-112.268	-47.0955	-149.301	-18.1665	21.2072	38.5016	0.233472	103.841	-1.98204	66.4907	210.67	87.3169	21.2072	149.943	25.1734	147.391	172.058	231.687	179.209	185.034	252.848	149.943	230.788	294.271	230.788	294.271	230.788	317.939	274.008	246.015	278.672	315.349	230.788	266.494	231.82	77.8671	209.585
			-86.3284	-42.0546	-38.9108	149.886	111.897	70.4675	33.4541	-109.773	-44.6009	-146.807	-15.6719	23.7018	40.9962	2.72803	106.335	0.512522	68.9853	213.165	89.8115	23.7018	152.438	27.6679	149.886	174.553	94.382	192.008	187.528	255.343	152.438	233.282	296.766	233.282	296.766	233.282	320.434	276.503	248.509	281.166	317.843	233.282	268.989	234.314	80.3617	212.08
			44.2737	47.4176	236.214	198.225	156.796	119.782	-23.4448	41.7274	-60.4784	70.6565	110.03	127.325	89.0564	192.664	86.8409	155.314	299.493	176.14	110.03	238.766	113.996	236.214	260.881	180.71	268.032	117.061	341.671	238.766	319.611	383.094	319.611	383.094	319.611	406.762	362.831	334.838	367.495	404.172	319.611	355.317	320.643	166.69	298.408
			3.14387	191.94	153.951	112.522	75.5087	-67.7185	-2.5463	-104.752	26.3827	65.7564	83.0508	44.7827	148.39	42.5672	111.04	255.219	131.866	65.7564	194.492	69.7226	191.94	216.607	136.437	223.758	229.583	252.848	194.492	275.337	338.821	275.337	338.821	275.337	362.488	318.557	290.564	323.221	359.898	275.337	311.043	276.369	122.416	254.135
			188.796	150.807	109.378	72.3648	-70.8624	-5.69017	-107.896	23.2389	62.6125	79.9069	41.6388	145.246	39.4233	107.896	252.075	128.722	62.6125	191.349	66.5787	188.796	213.463	133.293	220.614	226.439	294.253	152.438	272.193	335.677	272.193	335.677	272.193	359.344	315.413	287.42	320.077	356.754	272.193	307.899	273.225	119.272	250.991
			-37.989	-79.4181	-116.432	-259.659	-194.487	-296.692	-165.557	-126.184	-108.889	-147.158	-43.5503	-149.373	-80.9003	63.2791	-60.0741	-126.184	2.55222	-122.218	0	24.6671	-55.5036	31.8179	37.6429	105.457	2.55222	319.611	146.88	83.3968	146.88	83.3968	170.548	126.617	98.6238	131.281	167.958	83.3968	119.103	84.4287	-69.5239	62.1944
			-41.4291	-78.4425	-221.67	-156.498	-258.703	-127.569	-88.1948	-70.9004	-109.169	-5.5613	-111.384	-42.9113	101.268	-22.0851	-88.1948	40.5412	-84.2287	37.989	62.656	-17.5146	69.8068	75.6318	143.446	40.5412	121.386	338.821	121.386	184.869	121.386	208.537	164.606	136.613	169.27	205.947	121.386	157.092	122.418	-31.5349	100.183
			-37.0134	-180.241	-115.068	-217.274	-86.1394	-46.7657	-29.4713	-67.7395	35.8678	-69.955	-1.48221	142.697	19.344	-46.7657	81.9703	-42.7995	79.4181	104.085	23.9145	111.236	117.061	184.875	81.9703	162.815	226.299	272.193	226.299	162.815	249.966	206.035	178.042	210.699	247.376	162.815	198.521	163.847	9.89421	141.612
			-143.227	-78.055	-180.261	-49.126	-9.75228	7.54211	-30.726	72.8812	-32.9415	35.5312	179.711	56.3574	-9.75228	118.984	-5.78611	116.432	141.099	60.9279	148.249	154.074	221.889	118.984	199.828	263.312	199.828	146.88	199.828	286.98	243.048	215.055	247.712	284.389	199.828	235.535	200.86	46.9076	178.626
			65.1722	-37.0336	94.1013	133.475	150.769	112.501	216.108	110.286	178.758	322.938	199.585	133.475	262.211	137.441	259.659	284.326	204.155	291.477	297.302	365.116	262.211	343.056	406.539	343.056	406.539	121.386	430.207	386.276	358.283	390.94	427.617	343.056	378.762	344.087	190.135	321.853
			-102.206	28.929	68.3027	85.5971	47.329	150.936	45.1135	113.586	257.766	134.412	68.3027	197.039	72.2689	194.487	219.154	138.983	226.304	232.129	299.944	197.039	277.883	341.367	277.883	341.367	277.883	249.966	321.103	293.11	325.767	362.444	277.883	313.59	278.915	124.963	256.681
			131.135	170.509	187.803	149.535	253.142	147.319	215.792	359.971	236.618	170.509	299.245	174.475	296.692	321.359	241.189	328.51	334.335	402.149	299.245	380.089	443.573	380.089	443.573	380.089	467.241	243.048	395.316	427.973	464.65	380.089	415.795	381.121	227.168	358.887
			39.3737	56.6681	18.3999	122.007	16.1844	84.6572	228.837	105.483	39.3737	168.11	43.3399	165.557	190.225	110.054	197.375	203.2	271.015	168.11	248.954	312.438	248.954	312.438	248.954	336.106	292.174	358.283	296.838	333.515	248.954	284.66	249.986	96.0336	227.752
			17.2944	-20.9737	82.6335	-23.1892	45.2835	189.463	66.1097	0	128.736	3.96617	126.184	150.851	70.6802	158.002	163.827	231.641	128.736	209.581	273.064	209.581	273.064	209.581	296.732	252.801	224.808	325.767	294.142	209.581	245.287	210.613	56.6599	188.378
			-38.2681	65.3391	-40.4836	27.9891	172.169	48.8153	-17.2944	111.442	-13.3282	108.889	133.556	53.3858	140.707	146.532	214.347	111.442	192.286	255.77	192.286	255.77	192.286	279.438	235.506	207.513	240.17	464.65	192.286	227.992	193.318	39.3655	171.084
			103.607	-2.21551	66.2572	210.437	87.0834	20.9737	149.71	24.9399	147.158	171.825	91.6539	178.975	184.8	252.615	149.71	230.554	294.038	230.554	294.038	230.554	317.706	273.774	245.781	278.438	315.115	248.954	266.261	231.586	77.6337	209.352
			-105.823	-37.35	106.829	-16.5238	-82.6335	46.1025	-78.6674	43.5503	68.2173	-11.9533	75.3681	81.1931	149.007	46.1025	126.947	190.431	126.947	190.431	126.947	214.098	170.167	142.174	174.831	211.508	126.947	245.287	127.979	-25.9736	105.745
			68.4728	212.652	89.2989	23.1892	151.925	27.1554	149.373	174.04	93.8695	181.191	187.016	254.83	151.925	232.77	296.254	232.77	296.254	232.77	319.921	275.99	247.997	280.654	317.331	232.77	268.476	193.318	79.8492	211.567
			144.179	20.8262	-45.2835	83.4525	-41.3173	80.9003	105.567	25.3967	112.718	118.543	186.357	83.4525	164.297	227.781	164.297	227.781	164.297	251.448	207.517	179.524	212.181	248.858	164.297	200.003	165.329	77.6337	143.095
			-123.353	-189.463	-60.7269	-185.497	-63.2791	-38.6121	-118.783	-31.4613	-25.6363	42.178	-60.7269	20.1177	83.6013	20.1177	83.6013	20.1177	107.269	63.3378	35.3447	68.0017	104.679	20.1177	55.8239	21.1496	-132.803	105.745
			-66.1097	62.6263	-62.1435	60.0741	84.7412	4.5705	91.892	97.717	165.531	62.6263	143.471	206.955	143.471	206.955	143.471	230.622	186.691	158.698	191.355	228.032	143.471	179.177	144.503	-9.44977	122.268
			128.736	3.96617	126.184	150.851	70.6802	158.002	163.827	231.641	128.736	209.581	273.064	209.581	273.064	209.581	296.732	252.801	224.808	257.465	294.142	209.581	245.287	210.613	56.6599	188.378
			-124.77	-2.55222	22.1148	-58.0558	29.2656	35.0906	102.905	0	80.8446	144.328	80.8446	144.328	80.8446	167.996	124.065	96.0716	128.729	165.406	80.8446	116.551	81.8765	-72.0761	59.6421
			122.218	146.885	66.714	154.036	159.86	227.675	124.77	205.614	269.098	205.614	269.098	205.614	292.766	248.835	220.841	253.499	290.176	205.614	241.321	206.646	52.6938	184.412
			24.6671	-55.5036	31.8179	37.6429	105.457	2.55222	83.3968	146.88	83.3968	146.88	83.3968	170.548	126.617	98.6238	131.281	167.958	83.3968	119.103	84.4287	-69.5239	62.1944
			-80.1707	7.1508	12.9758	80.79	-22.1148	58.7297	122.213	58.7297	122.213	58.7297	145.881	101.95	73.9568	106.614	143.291	58.7297	94.4359	59.7616	-94.191	37.5273
			87.3215	93.1465	160.961	58.0558	138.9	202.384	138.9	202.384	138.9	226.052	182.121	154.127	186.784	223.462	138.9	174.607	139.932	-14.0203	117.698
			5.82498	73.6392	-29.2656	51.5789	115.063	51.5789	115.063	51.5789	138.73	94.7991	66.806	99.463	136.14	51.5789	87.2851	52.6108	-101.342	30.3765
			67.8143	-35.0906	45.7539	109.238	45.7539	109.238	45.7539	132.905	88.9741	60.981	93.638	130.315	45.7539	81.4601	46.7859	-107.167	24.5515
			-102.905	-22.0603	41.4234	-22.0603	41.4234	-22.0603	65.091	21.1598	-6.83327	25.8238	62.5008	-22.0603	13.6459	-21.0284	-174.981	-43.2627
			80.8446	144.328	80.8446	144.328	80.8446	167.996	124.065	96.0716	128.729	165.406	80.8446	116.551	81.8765	-72.0761	59.6421
			63.4837	0	63.4837	0	87.1514	43.2202	15.227	47.8841	84.5611	0	35.7062	1.03192	-152.921	-21.2024
			-63.4837	0	-63.4837	23.6677	-20.2635	-48.2566	-15.5996	21.0775	-63.4837	-27.7775	-62.4517	-216.404	-84.6861
			63.4837	0	87.1514	43.2202	15.227	47.8841	84.5611	0	35.7062	1.03192	-152.921	-21.2024
			-63.4837	23.6677	-20.2635	-48.2566	-15.5996	21.0775	-63.4837	-27.7775	-62.4517	-216.404	-84.6861
			87.1514	43.2202	15.227	47.8841	84.5611	0	35.7062	1.03192	-152.921	-21.2024
			-43.9312	-71.9243	-39.2673	-2.59023	-87.1514	-51.4452	-86.1194	-240.072	-108.354
			-27.9931	4.66393	41.341	-43.2202	-7.51396	-42.1882	-196.141	-64.4226
			32.657	69.3341	-15.227	20.4792	-14.1951	-168.148	-36.4295
			36.677	-47.8841	-12.1779	-46.8522	-200.805	-69.0865
			-84.5611	-48.8549	-83.5292	-237.482	-105.764
			35.7062	1.03192	-152.921	-21.2024
			-34.6743	-188.627	-56.9086
			-153.953	-22.2343
			131.718
MT#14 (2)			-89.8026	-133.856	-200.805	-303.143	-425.525	-594.216	-911.191	-1123.71	-1101.52	-1209.47	-1293.98	-1441.91	-1398.44	-1716.59	-2055.93	-2224.11	-2351.03	-2483.82	-2606.6	-2858.76	-2942.89	-2921.31	-3092.23	-3051.6	-3346.83	-3471.68	-3473.74	-3599.41	-3557.01	-3917.35	-3915.98	-4106.91	-4254.97	-4362.27	-4467.01	-4446.26	-4510.29	-4849.47	-5018.11	-5165.1	-5250.95	-5376.79	-5503.78	-5609.57	-5863.25	-5864.16	-6117.8
			-44.0538	-111.002	-213.341	-335.722	-504.413	-821.388	-1033.91	-1011.72	-1119.67	-1204.18	-1352.11	-1308.64	-1626.79	-1966.13	-2134.31	-2261.22	-2394.01	-2516.79	-2768.95	-2853.09	-2831.5	-3002.43	-2961.8	-3257.03	-3381.87	-3383.94	-3509.61	-3467.21	-3827.54	-3826.17	-4017.11	-4165.17	-4272.46	-4377.21	-4356.46	-4420.49	-4759.67	-4928.3	-5075.3	-5161.15	-5286.99	-5413.98	-5519.77	-5773.44	-5774.36	-6027.99	-6175.76
			-66.9483	-169.287	-291.668	-460.359	-777.335	-989.857	-967.665	-1075.61	-1160.13	-1308.05	-1264.59	-1582.73	-1922.08	-2090.26	-2217.17	-2349.96	-2472.74	-2724.9	-2809.04	-2787.45	-2958.37	-2917.74	-3212.97	-3337.82	-3339.88	-3465.56	-3423.15	-3783.49	-3782.12	-3973.05	-4121.12	-4228.41	-4333.16	-4312.4	-4376.43	-4715.62	-4884.25	-5031.24	-5117.1	-5242.94	-5369.93	-5475.71	-5729.39	-5730.31	-5983.94	-6131.7	-6131.88
			-102.339	-224.72	-393.411	-710.386	-922.909	-900.717	-1008.67	-1093.18	-1241.1	-1197.64	-1515.79	-1855.13	-2023.31	-2150.22	-2283.01	-2405.79	-2657.95	-2742.09	-2720.5	-2891.42	-2850.8	-3146.02	-3270.87	-3272.94	-3398.61	-3557.01	-3716.54	-3715.17	-3906.1	-4054.17	-4161.46	-4266.21	-4245.45	-4309.48	-4648.67	-4817.3	-4964.29	-5050.15	-5175.99	-5302.98	-5408.76	-5662.44	-5663.36	-5916.99	-6064.76	-6064.94	-6552.6
			-122.381	-291.073	-608.048	-820.57	-798.378	-906.327	-990.841	-1138.77	-1095.3	-1413.45	-1752.79	-1920.97	-2047.88	-2180.67	-2303.45	-2555.61	-2639.75	-2618.16	-2789.08	-2748.46	-3043.69	-3168.53	-3170.6	-3296.27	-3253.87	-3827.54	-3612.83	-3803.77	-3951.83	-4059.12	-4163.87	-4143.12	-4207.15	-4546.33	-4714.96	-4861.96	-4947.81	-5073.65	-5200.64	-5306.43	-5560.1	-5561.02	-5814.65	-5962.42	-5962.6	-6450.26	-6366.51
			-168.691	-485.666	-698.189	-675.996	-783.945	-868.46	-1016.38	-972.918	-1291.07	-1630.41	-1798.59	-1925.5	-2058.29	-2181.07	-2433.23	-2517.37	-2495.78	-2666.7	-2626.08	-2921.3	-3046.15	-3048.22	-3173.89	-3131.48	-3491.82	-3782.12	-3681.38	-3829.45	-3936.74	-4041.49	-4020.73	-4084.76	-4423.95	-4592.58	-4739.57	-4825.43	-4951.27	-5078.26	-5184.04	-5437.72	-5438.64	-5692.27	-5840.04	-5840.22	-6327.88	-6244.12	-6476.06
			-316.975	-529.498	-507.305	-615.254	-699.769	-847.693	-804.227	-1122.38	-1461.72	-1629.9	-1756.81	-1889.6	-2012.38	-2264.54	-2348.68	-2327.09	-2498.01	-2457.39	-2752.61	-2877.46	-2879.52	-3005.2	-2962.79	-3323.13	-3321.76	-3906.1	-3660.76	-3768.05	-3872.8	-3852.04	-3916.07	-4255.26	-4423.89	-4570.88	-4656.74	-4782.58	-4909.57	-5015.35	-5269.03	-5269.95	-5523.58	-5671.34	-5671.52	-6159.19	-6075.43	-6307.37	-6455.08
			-212.523	-190.33	-298.279	-382.794	-530.717	-487.251	-805.4	-1144.74	-1312.92	-1439.84	-1572.63	-1695.4	-1947.56	-2031.7	-2010.12	-2181.04	-2140.41	-2435.64	-2560.48	-2562.55	-2688.22	-2645.82	-3006.16	-3004.78	-3195.72	-3951.83	-3451.08	-3555.82	-3535.07	-3599.1	-3938.28	-4106.92	-4253.91	-4339.76	-4465.6	-4592.59	-4698.38	-4952.06	-4952.97	-5206.6	-5354.37	-5354.55	-5842.21	-5758.46	-5990.4	-6138.1	-6158.55
			22.1925	-85.7565	-170.271	-318.195	-274.729	-592.878	-932.219	-1100.4	-1227.31	-1360.1	-1482.88	-1735.04	-1819.18	-1797.59	-1968.51	-1927.89	-2223.11	-2347.96	-2350.03	-2475.7	-2433.3	-2793.63	-2792.26	-2983.2	-3131.26	-3936.74	-3343.3	-3322.55	-3386.57	-3725.76	-3894.39	-4041.39	-4127.24	-4253.08	-4380.07	-4485.85	-4739.53	-4740.45	-4994.08	-5141.85	-5142.03	-5629.69	-5545.94	-5777.87	-5925.58	-5946.03	-6031.49
			-107.949	-192.464	-340.387	-296.921	-615.07	-954.411	-1122.59	-1249.51	-1382.29	-1505.07	-1757.23	-1841.37	-1819.78	-1990.71	-1950.08	-2245.31	-2370.15	-2372.22	-2497.89	-2455.49	-2815.83	-2814.45	-3005.39	-3153.45	-3260.75	-3872.8	-3344.74	-3408.77	-3747.95	-3916.59	-4063.58	-4149.43	-4275.27	-4402.26	-4508.05	-4761.73	-4762.64	-5016.27	-5164.04	-5164.22	-5651.88	-5568.13	-5800.07	-5947.77	-5968.22	-6053.68	-6159.18
			-84.5146	-232.438	-188.972	-507.121	-846.463	-1014.64	-1141.56	-1274.35	-1397.13	-1649.29	-1733.42	-1711.84	-1882.76	-1842.13	-2137.36	-2262.21	-2264.27	-2389.94	-2347.54	-2707.88	-2706.51	-2897.44	-3045.5	-3152.8	-3257.54	-3535.07	-3300.82	-3640	-3808.64	-3955.63	-4041.48	-4167.32	-4294.31	-4400.1	-4653.78	-4654.69	-4908.33	-5056.09	-5056.27	-5543.93	-5460.18	-5692.12	-5839.82	-5860.27	-5945.73	-6051.23	-6135.57
			-147.924	-104.458	-422.607	-761.948	-930.129	-1057.04	-1189.83	-1312.61	-1564.77	-1648.91	-1627.32	-1798.24	-1757.62	-2052.84	-2177.69	-2179.76	-2305.43	-2263.02	-2623.36	-2621.99	-2812.92	-2960.99	-3068.28	-3173.03	-3152.27	-3386.57	-3555.49	-3724.12	-3871.11	-3956.97	-4082.81	-4209.8	-4315.58	-4569.26	-4570.18	-4823.81	-4971.58	-4971.76	-5459.42	-5375.66	-5607.6	-5755.31	-5775.76	-5861.22	-5966.72	-6051.06	-5946.13
			43.4659	-274.683	-614.024	-782.205	-909.118	-1041.91	-1164.69	-1416.85	-1500.99	-1479.4	-1650.32	-1609.69	-1904.92	-2029.77	-2031.83	-2157.51	-2115.1	-2475.44	-2474.07	-2665	-2813.07	-2920.36	-3025.1	-3004.35	-3068.38	-3747.95	-3576.2	-3723.19	-3809.05	-3934.88	-4061.88	-4167.66	-4421.34	-4422.25	-4675.89	-4823.65	-4823.83	-5311.49	-5227.74	-5459.68	-5607.39	-5627.83	-5713.29	-5818.79	-5903.13	-5798.21	-5945.42
			-318.149	-657.49	-825.671	-952.584	-1085.37	-1208.15	-1460.31	-1544.45	-1522.86	-1693.79	-1653.16	-1948.39	-2073.23	-2075.3	-2200.97	-2158.57	-2518.9	-2517.53	-2708.47	-2856.53	-2963.82	-3068.57	-3047.82	-3111.85	-3451.03	-3808.64	-3766.66	-3852.51	-3978.35	-4105.34	-4211.13	-4464.8	-4465.72	-4719.35	-4867.12	-4867.3	-5354.96	-5271.21	-5503.14	-5650.85	-5671.3	-5756.76	-5862.26	-5946.6	-5841.67	-5988.89	-5925.3
			-339.341	-507.522	-634.435	-767.225	-890.004	-1142.16	-1226.3	-1204.71	-1375.64	-1335.01	-1630.24	-1755.08	-1757.15	-1882.82	-1840.42	-2200.76	-2199.38	-2390.32	-2538.38	-2645.68	-2750.42	-2729.67	-2793.7	-3132.88	-3301.52	-3871.11	-3534.36	-3660.2	-3787.19	-3892.98	-4146.66	-4147.57	-4401.2	-4548.97	-4549.15	-5036.81	-4953.06	-5185	-5332.7	-5353.15	-5438.61	-5544.11	-5628.45	-5523.52	-5670.74	-5607.15	-5735.59
			-168.181	-295.094	-427.883	-550.663	-802.823	-886.962	-865.374	-1036.3	-995.669	-1290.9	-1415.74	-1417.81	-1543.48	-1501.08	-1861.41	-1860.04	-2050.98	-2199.04	-2306.33	-2411.08	-2390.33	-2454.36	-2793.54	-2962.17	-3109.17	-3809.05	-3320.86	-3447.85	-3553.64	-3807.31	-3808.23	-4061.86	-4209.63	-4209.81	-4697.47	-4613.72	-4845.65	-4993.36	-5013.81	-5099.27	-5204.77	-5289.11	-5184.18	-5331.4	-5267.81	-5396.25	-5480.23
			-126.913	-259.702	-382.482	-634.642	-718.78	-697.192	-868.114	-827.487	-1122.71	-1247.56	-1249.63	-1375.3	-1332.9	-1693.23	-1691.86	-1882.8	-2030.86	-2138.15	-2242.9	-2222.15	-2286.17	-2625.36	-2793.99	-2940.99	-3026.84	-3978.35	-3279.67	-3385.45	-3639.13	-3640.05	-3893.68	-4041.45	-4041.63	-4529.29	-4445.54	-4677.47	-4825.18	-4845.63	-4931.09	-5036.59	-5120.93	-5016	-5163.22	-5099.63	-5228.07	-5312.05	-5417.83
			-132.79	-255.569	-507.729	-591.868	-570.28	-741.202	-700.575	-995.802	-1120.65	-1122.71	-1248.39	-1205.98	-1566.32	-1564.95	-1755.88	-1903.95	-2011.24	-2115.99	-2095.23	-2159.26	-2498.45	-2667.08	-2814.07	-2899.93	-3025.77	-3787.19	-3258.54	-3512.22	-3513.14	-3766.77	-3914.53	-3914.71	-4402.38	-4318.62	-4550.56	-4698.27	-4718.71	-4804.17	-4909.68	-4994.01	-4889.09	-5036.3	-4972.71	-5101.16	-5185.13	-5290.91	-5460.19
			-122.78	-374.939	-459.078	-437.49	-608.412	-567.785	-863.012	-987.859	-989.924	-1115.6	-1073.19	-1433.53	-1432.16	-1623.09	-1771.16	-1878.45	-1983.2	-1962.44	-2026.47	-2365.66	-2534.29	-2681.28	-2767.14	-2892.98	-3019.97	-3553.64	-3379.43	-3380.35	-3633.98	-3781.74	-3781.92	-4269.59	-4185.83	-4417.77	-4565.48	-4585.92	-4671.38	-4776.89	-4861.22	-4756.3	-4903.51	-4839.92	-4968.37	-5052.34	-5158.13	-5327.4	-5602.34
			-252.16	-336.298	-314.71	-485.632	-445.005	-740.233	-865.08	-867.145	-992.819	-950.413	-1310.75	-1309.38	-1500.31	-1648.38	-1755.67	-1860.42	-1839.66	-1903.69	-2242.88	-2411.51	-2558.5	-2644.36	-2770.2	-2897.19	-3002.97	-3639.13	-3257.57	-3511.2	-3658.97	-3659.14	-4146.81	-4063.05	-4294.99	-4442.7	-4463.15	-4548.6	-4654.11	-4738.44	-4633.52	-4780.73	-4717.14	-4845.59	-4929.56	-5035.35	-5204.62	-5479.56	-5458.02
			-84.1389	-62.5508	-233.473	-192.846	-488.073	-612.92	-614.985	-740.66	-698.254	-1058.59	-1057.22	-1248.15	-1396.22	-1503.51	-1608.26	-1587.5	-1651.53	-1990.72	-2159.35	-2306.34	-2392.2	-2518.04	-2645.03	-2750.81	-3004.49	-3513.14	-3259.04	-3406.81	-3406.98	-3894.65	-3810.89	-4042.83	-4190.54	-4210.99	-4296.44	-4401.95	-4486.28	-4381.36	-4528.57	-4464.98	-4593.43	-4677.41	-4783.19	-4952.46	-5227.4	-5205.86	-5206.44
			21.588	-149.334	-108.707	-403.934	-528.781	-530.846	-656.521	-614.115	-974.453	-973.081	-1164.01	-1312.08	-1419.37	-1524.12	-1503.36	-1567.39	-1906.58	-2075.21	-2222.21	-2308.06	-2433.9	-2560.89	-2666.67	-2920.35	-2921.27	-3633.98	-3322.67	-3322.85	-3810.51	-3726.75	-3958.69	-4106.4	-4126.85	-4212.31	-4317.81	-4402.15	-4297.22	-4444.44	-4380.85	-4509.29	-4593.27	-4699.05	-4868.32	-5143.26	-5121.72	-5122.3	-5333.31
			-170.922	-130.295	-425.522	-550.369	-552.434	-678.109	-635.703	-996.041	-994.669	-1185.6	-1333.67	-1440.96	-1545.71	-1524.95	-1588.98	-1928.17	-2096.8	-2243.79	-2329.65	-2455.49	-2582.48	-2688.26	-2941.94	-2942.86	-3196.49	-3658.97	-3344.43	-3832.1	-3748.34	-3980.28	-4127.99	-4148.43	-4233.89	-4339.4	-4423.73	-4318.81	-4466.02	-4402.43	-4530.88	-4614.85	-4720.64	-4889.91	-5164.85	-5143.3	-5143.89	-5354.9
			40.627	-254.6	-379.447	-381.512	-507.187	-464.781	-825.119	-823.747	-1014.68	-1162.75	-1270.04	-1374.78	-1354.03	-1418.06	-1757.25	-1925.88	-2072.87	-2158.73	-2284.56	-2411.56	-2517.34	-2771.02	-2771.94	-3025.57	-3173.33	-3406.98	-3661.18	-3577.42	-3809.36	-3957.07	-3977.51	-4062.97	-4168.47	-4252.81	-4147.89	-4295.1	-4231.51	-4359.95	-4443.93	-4549.71	-4718.99	-4993.92	-4972.38	-4972.97	-5183.98
			-295.227	-420.074	-422.139	-547.814	-505.408	-865.746	-864.374	-1055.31	-1203.37	-1310.67	-1415.41	-1394.66	-1458.69	-1797.87	-1966.51	-2113.5	-2199.35	-2325.19	-2452.18	-2557.97	-2811.65	-2812.56	-3066.19	-3213.96	-3214.14	-3810.51	-3618.05	-3849.99	-3997.69	-4018.14	-4103.6	-4209.1	-4293.44	-4188.51	-4335.73	-4272.14	-4400.58	-4484.56	-4590.34	-4759.62	-5034.55	-5013.01	-5013.59	-5224.61
			-124.847	-126.912	-252.586	-210.18	-570.518	-569.147	-760.08	-908.145	-1015.44	-1120.18	-1099.43	-1163.46	-1502.65	-1671.28	-1818.27	-1904.13	-2029.96	-2156.96	-2262.74	-2516.42	-2517.33	-2770.97	-2918.73	-2918.91	-3406.57	-3748.34	-3554.76	-3702.47	-3722.91	-3808.37	-3913.87	-3998.21	-3893.29	-4040.5	-3976.91	-4105.35	-4189.33	-4295.11	-4464.39	-4739.32	-4717.78	-4718.37	-4929.38
			-2.06474	-127.739	-85.3332	-445.671	-444.3	-635.233	-783.298	-890.591	-995.337	-974.583	-1038.61	-1377.8	-1546.43	-1693.42	-1779.28	-1905.12	-2032.11	-2137.89	-2391.57	-2392.49	-2646.12	-2793.89	-2794.06	-3281.73	-3197.97	-3809.36	-3577.62	-3598.07	-3683.52	-3789.03	-3873.36	-3768.44	-3915.65	-3852.06	-3980.51	-4064.48	-4170.27	-4339.54	-4614.48	-4592.94	-4593.52	-4804.53
			-125.675	-83.2685	-443.606	-442.235	-633.169	-781.234	-888.527	-993.272	-972.518	-1036.55	-1375.73	-1544.37	-1691.36	-1777.21	-1903.05	-2030.04	-2135.83	-2389.51	-2390.42	-2644.06	-2791.82	-2792	-3279.66	-3195.91	-3427.85	-3997.69	-3596	-3681.46	-3786.96	-3871.3	-3766.37	-3913.59	-3850	-3978.44	-4062.42	-4168.2	-4337.48	-4612.41	-4590.87	-4591.45	-4802.47
			42.4061	-317.932	-316.561	-507.494	-655.559	-762.852	-867.597	-846.844	-910.873	-1250.06	-1418.69	-1565.68	-1651.54	-1777.38	-1904.37	-2010.15	-2263.83	-2264.75	-2518.38	-2666.15	-2666.32	-3153.99	-3070.23	-3302.17	-3449.88	-3722.91	-3555.79	-3661.29	-3745.62	-3640.7	-3787.92	-3724.32	-3852.77	-3936.75	-4042.53	-4211.8	-4486.74	-4465.2	-4465.78	-4676.79
			-360.338	-358.967	-549.9	-697.965	-805.258	-910.003	-889.25	-953.28	-1292.47	-1461.1	-1608.09	-1693.95	-1819.78	-1946.78	-2052.56	-2306.24	-2307.15	-2560.79	-2708.55	-2708.73	-3196.39	-3112.64	-3344.58	-3492.29	-3512.73	-3683.52	-3703.69	-3788.03	-3683.11	-3830.32	-3766.73	-3895.17	-3979.15	-4084.93	-4254.21	-4529.14	-4507.6	-4508.19	-4719.2
			1.37131	-189.562	-337.627	-444.92	-549.666	-528.912	-592.942	-932.128	-1100.76	-1247.75	-1333.61	-1459.45	-1586.44	-1692.22	-1945.9	-1946.82	-2200.45	-2348.21	-2348.39	-2836.06	-2752.3	-2984.24	-3131.95	-3152.39	-3237.85	-3786.96	-3427.69	-3322.77	-3469.98	-3406.39	-3534.84	-3618.81	-3724.59	-3893.87	-4168.81	-4147.26	-4147.85	-4358.86
			-190.934	-338.998	-446.292	-551.037	-530.283	-594.313	-933.499	-1102.13	-1249.12	-1334.98	-1460.82	-1587.81	-1693.59	-1947.27	-1948.19	-2201.82	-2349.59	-2349.76	-2837.43	-2753.67	-2985.61	-3133.32	-3153.77	-3239.22	-3344.73	-3745.62	-3324.14	-3471.35	-3407.76	-3536.21	-3620.19	-3725.97	-3895.24	-4170.18	-4148.64	-4149.22	-4360.23
			-148.065	-255.358	-360.103	-339.35	-403.379	-742.565	-911.198	-1058.19	-1144.05	-1269.88	-1396.88	-1502.66	-1756.34	-1757.25	-2010.89	-2158.65	-2158.83	-2646.49	-2562.74	-2794.68	-2942.38	-2962.83	-3048.29	-3153.79	-3238.13	-3683.11	-3280.42	-3216.83	-3345.27	-3429.25	-3535.03	-3704.31	-3979.24	-3957.7	-3958.28	-4169.3
			-107.293	-212.038	-191.285	-255.315	-594.5	-763.133	-910.125	-995.98	-1121.82	-1248.81	-1354.59	-1608.27	-1609.19	-1862.82	-2010.59	-2010.77	-2498.43	-2414.67	-2646.61	-2794.32	-2814.77	-2900.23	-3005.73	-3090.07	-2985.14	-3469.98	-3068.77	-3197.21	-3281.19	-3386.97	-3556.24	-3831.18	-3809.64	-3810.22	-4021.24
			-104.745	-83.9916	-148.021	-487.207	-655.84	-802.832	-888.687	-1014.53	-1141.52	-1247.3	-1500.98	-1501.9	-1755.53	-1903.29	-1903.47	-2391.14	-2307.38	-2539.32	-2687.03	-2707.47	-2792.93	-2898.44	-2982.77	-2877.85	-3025.06	-3407.76	-3089.92	-3173.89	-3279.67	-3448.95	-3723.89	-3702.34	-3702.93	-3913.94
			20.7535	-43.2761	-382.462	-551.095	-698.087	-783.942	-909.781	-1036.77	-1142.56	-1396.24	-1397.15	-1650.78	-1798.55	-1798.73	-2286.39	-2202.64	-2434.57	-2582.28	-2602.73	-2688.19	-2793.69	-2878.03	-2773.1	-2920.32	-2856.73	-3345.27	-3069.15	-3174.93	-3344.2	-3619.14	-3597.6	-3598.18	-3809.2
			-64.0296	-403.216	-571.849	-718.841	-804.695	-930.534	-1057.53	-1163.31	-1416.99	-1417.9	-1671.54	-1819.3	-1819.48	-2307.14	-2223.39	-2455.33	-2603.04	-2623.48	-2708.94	-2814.44	-2898.78	-2793.86	-2941.07	-2877.48	-3005.92	-3281.19	-3195.68	-3364.96	-3639.89	-3618.35	-3618.94	-3829.95
			-339.186	-507.819	-654.811	-740.666	-866.505	-993.496	-1099.28	-1352.96	-1353.87	-1607.51	-1755.27	-1755.45	-2243.11	-2159.36	-2391.3	-2539.01	-2559.45	-2644.91	-2750.41	-2834.75	-2729.83	-2877.04	-2813.45	-2941.89	-3025.87	-3279.67	-3300.93	-3575.86	-3554.32	-3554.91	-3765.92
			-168.633	-315.625	-401.48	-527.319	-654.31	-760.094	-1013.77	-1014.69	-1268.32	-1416.09	-1416.27	-1903.93	-1820.17	-2052.11	-2199.82	-2220.27	-2305.73	-2411.23	-2495.57	-2390.64	-2537.86	-2474.27	-2602.71	-2686.69	-2792.47	-3344.2	-3236.68	-3215.14	-3215.72	-3426.73
			-146.992	-232.847	-358.686	-485.677	-591.461	-845.14	-846.056	-1099.69	-1247.45	-1247.63	-1735.3	-1651.54	-1883.48	-2031.19	-2051.63	-2137.09	-2242.6	-2326.93	-2222.01	-2369.22	-2305.63	-2434.08	-2518.05	-2623.83	-2793.11	-3639.89	-3046.5	-3047.09	-3258.1
			-85.8547	-211.694	-338.685	-444.469	-698.148	-699.064	-952.696	-1100.46	-1100.64	-1588.3	-1504.55	-1736.49	-1884.19	-1904.64	-1990.1	-2095.6	-2179.94	-2075.01	-2222.23	-2158.64	-2287.08	-2371.06	-2476.84	-2646.12	-2921.05	-3554.32	-2900.09	-3111.11
			-125.839	-252.83	-358.614	-612.293	-613.209	-866.841	-1014.61	-1014.79	-1502.45	-1418.69	-1650.63	-1798.34	-1818.79	-1904.25	-2009.75	-2094.09	-1989.16	-2136.38	-2072.79	-2201.23	-2285.21	-2390.99	-2560.26	-2835.2	-2813.66	-3215.72	-3025.25
			-126.991	-232.775	-486.454	-487.37	-741.003	-888.768	-888.947	-1376.61	-1292.86	-1524.79	-1672.5	-1692.95	-1778.41	-1883.91	-1968.25	-1863.32	-2010.54	-1946.95	-2075.39	-2159.37	-2265.15	-2434.42	-2709.36	-2687.82	-2688.4	-3258.1
			-105.784	-359.463	-360.379	-614.011	-761.776	-761.955	-1249.62	-1165.86	-1397.8	-1545.51	-1565.96	-1651.42	-1756.92	-1841.26	-1736.33	-1883.55	-1819.96	-1948.4	-2032.38	-2138.16	-2307.43	-2582.37	-2560.83	-2561.41	-2772.42
			-253.679	-254.595	-508.227	-655.992	-656.171	-1143.83	-1060.08	-1292.02	-1439.73	-1460.17	-1545.63	-1651.13	-1735.47	-1630.55	-1777.76	-1714.17	-1842.61	-1926.59	-2032.37	-2201.65	-2476.58	-2455.04	-2455.63	-2666.64
			-0.915966	-254.548	-402.313	-402.492	-890.156	-806.401	-1038.34	-1186.05	-1206.49	-1291.95	-1397.46	-1481.79	-1376.87	-1524.08	-1460.49	-1588.94	-1672.91	-1778.69	-1947.97	-2222.91	-2201.36	-2201.95	-2412.96
			-253.632	-401.397	-401.576	-889.24	-805.486	-1037.42	-1185.13	-1205.58	-1291.04	-1396.54	-1480.88	-1375.95	-1523.17	-1459.58	-1588.02	-1672	-1777.78	-1947.05	-2221.99	-2200.45	-2201.03	-2412.05
			-147.765	-147.944	-635.608	-551.853	-783.791	-931.498	-951.945	-1037.4	-1142.91	-1227.24	-1122.32	-1269.53	-1205.94	-1334.39	-1418.37	-1524.15	-1693.42	-1968.36	-1946.82	-1947.4	-2158.41
			-0.179049	-487.843	-404.088	-636.026	-783.733	-804.18	-889.639	-995.142	-1079.48	-974.553	-1121.77	-1058.18	-1186.62	-1270.6	-1376.38	-1545.66	-1820.59	-1799.05	-1799.63	-2010.65
			-487.663	-403.909	-635.847	-783.554	-804.001	-889.46	-994.963	-1079.3	-974.374	-1121.59	-1058	-1186.44	-1270.42	-1376.2	-1545.48	-1820.41	-1798.87	-1799.45	-2010.47
			83.7544	-148.183	-295.891	-316.338	-401.797	-507.3	-591.637	-486.711	-633.927	-570.336	-698.78	-782.757	-888.538	-1057.81	-1332.75	-1311.21	-1311.79	-1522.81
			-231.938	-379.645	-400.092	-485.551	-591.054	-675.391	-570.465	-717.681	-654.091	-782.534	-866.512	-972.292	-1141.57	-1416.5	-1394.96	-1395.55	-1606.56
			-147.707	-168.154	-253.614	-359.117	-443.453	-338.527	-485.743	-422.153	-550.596	-634.574	-740.355	-909.63	-1184.57	-1163.02	-1163.61	-1374.62
			-20.4469	-105.906	-211.409	-295.746	-190.82	-338.036	-274.446	-402.889	-486.867	-592.647	-761.923	-1036.86	-1015.32	-1015.9	-1226.92
			-85.4593	-190.962	-275.299	-170.373	-317.589	-253.999	-382.442	-466.42	-572.2	-741.476	-1016.41	-994.87	-995.453	-1206.47
			-105.503	-189.84	-84.9138	-232.13	-168.54	-296.983	-380.96	-486.741	-656.016	-930.953	-909.411	-909.994	-1121.01
			-84.3366	20.5892	-126.627	-63.0366	-191.48	-275.457	-381.238	-550.513	-825.45	-803.908	-804.491	-1015.51
			104.926	-42.2903	21.3	-107.143	-191.121	-296.902	-466.177	-741.113	-719.571	-720.154	-931.169
			-147.216	-83.6258	-212.069	-296.047	-401.827	-571.102	-846.039	-824.497	-825.08	-1036.1
			63.5903	-64.8529	-148.831	-254.611	-423.886	-698.823	-677.281	-677.864	-888.879
			-128.443	-212.421	-318.202	-487.477	-762.413	-740.871	-741.454	-952.469
			-83.9776	-189.758	-359.033	-633.97	-612.428	-613.011	-824.026
			-105.781	-275.056	-549.992	-528.45	-529.033	-740.048
			-169.275	-444.211	-422.67	-423.253	-634.268
			-274.936	-253.394	-253.977	-464.993
			21.5418	20.9589	-190.056
			-0.582971	-211.598
			-211.015
MT#14 (3)			-487.247	-1122.59	-1883.91	-2376.63	-2836.29
			-635.345	-1396.66	-1889.38	-2349.04
			-761.318	-1254.04	-1713.7
			-492.718	-952.381
			-459.663
MT#14 (4)			-656.552	-1079.71	-1186.18
			-423.157	-529.625
			-106.468
MT#14 (5)			29.9941	-21.209	59.8984	-212.769	-509.768	-508	-870.111	-1312.97	-1779.13	-2010.79	-2434.58	-2984.58	-3640.96	-4423.99	-4804.98	-5312.83	-5778.54
			-51.2031	29.9043	-242.763	-539.762	-537.994	-900.105	-1342.97	-1809.13	-2040.79	-2464.57	-3014.57	-3670.95	-4453.99	-4834.97	-5342.83	-5808.53
			81.1074	-191.56	-488.559	-486.791	-848.902	-1291.76	-1757.92	-1989.58	-2413.37	-2963.37	-3619.75	-4402.79	-4783.77	-5291.62	-5757.33
			-272.667	-569.666	-567.898	-930.01	-1372.87	-1839.03	-2070.69	-2494.48	-3044.47	-3700.85	-4483.89	-4864.88	-5372.73	-5838.44
			-296.999	-295.231	-657.342	-1100.2	-1566.36	-1798.02	-2221.81	-2771.81	-3428.19	-4211.23	-4592.21	-5100.06	-5565.77
			1.76788	-360.343	-803.204	-1269.37	-1501.02	-1924.81	-2474.81	-3131.19	-3914.23	-4295.21	-4803.07	-5268.77
			-362.111	-804.972	-1271.13	-1502.79	-1926.58	-2476.58	-3132.96	-3915.99	-4296.98	-4804.83	-5270.54
			-442.861	-909.022	-1140.68	-1564.47	-2114.46	-2770.84	-3553.88	-3934.87	-4442.72	-4908.43
			-466.161	-697.819	-1121.61	-1671.6	-2327.98	-3111.02	-3492.01	-3999.86	-4465.57
			-231.657	-655.445	-1205.44	-1861.82	-2644.86	-3025.84	-3533.7	-3999.4
			-423.788	-973.784	-1630.17	-2413.2	-2794.19	-3302.04	-3767.75
			-549.997	-1206.38	-1989.42	-2370.4	-2878.25	-3343.96
			-656.381	-1439.42	-1820.4	-2328.26	-2793.96
			-783.038	-1164.02	-1671.88	-2137.58
			-380.984	-888.839	-1354.54
			-507.855	-973.56
			-465.705
MT#14 (6)			-123.386	-200.805	-787.777	-1678.76	-2376.75	-3157.27	-3644.65	-3859.33	-4681.67	-5347.59	-5849.52	-6507.03	-7052.35	-7537.7	-8066.75	-8786.76	-9401.43
			-77.4191	-664.391	-1555.38	-2253.37	-3033.89	-3521.26	-3735.94	-4558.28	-5224.2	-5726.13	-6383.64	-6928.96	-7414.31	-7943.36	-8663.37	-9278.05
			-586.972	-1477.96	-2175.95	-2956.47	-3443.84	-3658.52	-4480.86	-5146.79	-5648.71	-6306.23	-6851.54	-7336.89	-7865.95	-8585.96	-9200.63
			-890.987	-1588.98	-2369.49	-2856.87	-3071.55	-3893.89	-4559.81	-5061.74	-5719.25	-6264.57	-6749.92	-7278.97	-7998.98	-8613.66
			-697.991	-1478.51	-1965.88	-2180.56	-3002.9	-3668.83	-4170.75	-4828.27	-5373.58	-5858.93	-6387.99	-7108	-7722.67
			-780.517	-1267.89	-1482.57	-2304.91	-2970.83	-3472.76	-4130.28	-4675.59	-5160.94	-5689.99	-6410	-7024.68
			-487.377	-702.054	-1524.4	-2190.32	-2692.24	-3349.76	-3895.08	-4380.43	-4909.48	-5629.49	-6244.16
			-214.677	-1037.02	-1702.94	-2204.87	-2862.38	-3407.7	-3893.05	-4422.1	-5142.11	-5756.78
			-822.342	-1488.26	-1990.19	-2647.7	-3193.02	-3678.37	-4207.42	-4927.43	-5542.11
			-665.921	-1167.85	-1825.36	-2370.68	-2856.03	-3385.08	-4105.09	-4719.76
			-501.925	-1159.44	-1704.76	-2190.11	-2719.16	-3439.17	-4053.84
			-657.515	-1202.83	-1688.18	-2217.23	-2937.24	-3551.92
			-545.317	-1030.67	-1559.72	-2279.73	-2894.4
			-485.351	-1014.4	-1734.41	-2349.08
			-529.051	-1249.06	-1863.73
			-720.01	-1334.68
			-614.672
MT#15 (1)			-47.2544	-149.701	-551.972	-1157.91	-1612.04	-1915.1	-2829.21	-2968.53	-3439.65	-4711.98
			-102.446	-504.718	-1110.66	-1564.79	-1867.84	-2781.95	-2921.28	-3392.39	-4664.72
			-402.271	-1008.21	-1462.34	-1765.4	-2679.5	-2818.83	-3289.95	-4562.28
			-605.941	-1060.07	-1363.12	-2277.23	-2416.56	-2887.67	-4160.01
			-454.131	-757.184	-1671.29	-1810.62	-2281.73	-3554.07
			-303.053	-1217.16	-1356.49	-1827.6	-3099.93
			-914.108	-1053.44	-1524.55	-2796.88
			-139.328	-610.441	-1882.77
			-471.113	-1743.44
			-1272.33
MT#15 (2)			-508.816	-937.075	-1382.09	-1896.23	-2449.88	-2980.23	-3403.07	-3834.82	-4271.69	-4745.25	-5311.65	-5903.7	-6332.17	-6709.05	-7309.85	-7768.97	-8348.5	-8784.52	-9142.09	-9909.31	-10776.6	-11374.7	-12086.1
			-428.259	-873.278	-1387.42	-1941.07	-2471.42	-2894.25	-3326	-3762.88	-4236.44	-4802.84	-5394.88	-5823.36	-6200.24	-6801.03	-7260.15	-7839.68	-8275.71	-8633.27	-9400.49	-10267.8	-10865.8	-11577.3
			-445.019	-959.157	-1512.81	-2043.16	-2465.99	-2897.75	-3334.62	-3808.18	-4374.58	-4966.62	-5395.1	-5771.98	-6372.77	-6831.89	-7411.42	-7847.45	-8205.01	-8972.24	-9839.52	-10437.6	-11149.1
			-514.138	-1067.79	-1598.14	-2020.98	-2452.73	-2889.6	-3363.16	-3929.56	-4521.61	-4950.08	-5326.96	-5927.76	-6386.87	-6966.41	-7402.43	-7759.99	-8527.22	-9394.5	-9992.57	-10704.1
			-553.653	-1084	-1506.84	-1938.59	-2375.46	-2849.02	-3415.42	-4007.47	-4435.94	-4812.82	-5413.62	-5872.74	-6452.27	-6888.29	-7245.86	-8013.08	-8880.37	-9478.43	-10189.9
			-530.347	-953.184	-1384.94	-1821.81	-2295.37	-2861.77	-3453.81	-3882.29	-4259.17	-4859.96	-5319.08	-5898.61	-6334.64	-6692.2	-7459.43	-8326.71	-8924.78	-9636.27
			-422.837	-854.589	-1291.46	-1765.02	-2331.42	-2923.47	-3351.94	-3728.82	-4329.62	-4788.74	-5368.27	-5804.29	-6161.86	-6929.08	-7796.37	-8394.43	-9105.92
			-431.752	-868.626	-1342.18	-1908.58	-2500.63	-2929.1	-3305.98	-3906.78	-4365.9	-4945.43	-5381.45	-5739.02	-6506.24	-7373.53	-7971.59	-8683.08
			-436.874	-910.433	-1476.83	-2068.88	-2497.35	-2874.23	-3475.03	-3934.15	-4513.68	-4949.7	-5307.27	-6074.49	-6941.78	-7539.84	-8251.33
			-473.559	-1039.96	-1632.01	-2060.48	-2437.36	-3038.15	-3497.27	-4076.8	-4512.83	-4870.39	-5637.62	-6504.9	-7102.97	-7814.46
			-566.399	-1158.45	-1586.92	-1963.8	-2564.6	-3023.71	-3603.25	-4039.27	-4396.83	-5164.06	-6031.34	-6629.41	-7340.9
			-592.047	-1020.52	-1397.4	-1998.2	-2457.31	-3036.85	-3472.87	-3830.43	-4597.66	-5464.95	-6063.01	-6774.5
			-428.472	-805.353	-1406.15	-1865.27	-2444.8	-2880.82	-3238.39	-4005.61	-4872.9	-5470.96	-6182.45
			-376.881	-977.678	-1436.8	-2016.33	-2452.35	-2809.92	-3577.14	-4444.43	-5042.49	-5753.98
			-600.796	-1059.91	-1639.45	-2075.47	-2433.03	-3200.26	-4067.55	-4665.61	-5377.1
			-459.118	-1038.65	-1474.67	-1832.24	-2599.46	-3466.75	-4064.81	-4776.3
			-579.532	-1015.56	-1373.12	-2140.34	-3007.63	-3605.69	-4317.18
			-436.024	-793.588	-1560.81	-2428.1	-3026.16	-3737.65
			-357.564	-1124.79	-1992.07	-2590.14	-3301.63
			-767.222	-1634.51	-2232.57	-2944.06
			-867.288	-1465.35	-2176.84
			-598.062	-1309.55
			-711.49
MT#15 (3)			-508.443	-1146.13	-2055.81	-2817.07	-3090.94	-3621.73	-4201.46	-4654.79	-5429.15	-6024.72	-6638.59	-7424.27	-8029.22	-8703.85
			-637.692	-1547.37	-2308.63	-2582.5	-3113.28	-3693.02	-4146.34	-4920.71	-5516.28	-6130.15	-6915.82	-7520.78	-8195.41
			-909.678	-1670.94	-1944.81	-2475.59	-3055.33	-3508.65	-4283.02	-4878.59	-5492.46	-6278.13	-6883.09	-7557.71
			-761.262	-1035.13	-1565.92	-2145.65	-2598.97	-3373.34	-3968.91	-4582.78	-5368.45	-5973.41	-6648.04
			-273.869	-804.653	-1384.39	-1837.71	-2612.08	-3207.65	-3821.52	-4607.19	-5212.15	-5886.77
			-530.784	-1110.52	-1563.84	-2338.21	-2933.78	-3547.65	-4333.32	-4938.28	-5612.9
			-579.733	-1033.06	-1807.42	-2403	-3016.86	-3802.54	-4407.5	-5082.12
			-453.326	-1227.69	-1823.26	-2437.13	-3222.81	-3827.76	-4502.39
			-774.364	-1369.94	-1983.8	-2769.48	-3374.44	-4049.06
			-595.573	-1209.44	-1995.12	-2600.07	-3274.7
			-613.868	-1399.54	-2004.5	-2679.12
			-785.676	-1390.63	-2065.26
			-604.957	-1279.58
			-674.624
MT#15 (5)			-42.418	-128.759	-456.007	-669.362	-477.574	-755.596	-913.861	-806.044	-769.309	-888.579	-877.161	-944.985	-755.596	-925.818	-1005.9
			-86.3408	-413.589	-626.944	-435.156	-713.178	-871.443	-763.626	-726.891	-846.161	-834.743	-902.567	-713.178	-883.4	-963.478
			-327.248	-540.603	-348.815	-626.837	-785.102	-677.285	-640.55	-759.82	-748.402	-816.226	-626.837	-797.06	-877.138
			-213.355	-21.5668	-299.589	-457.854	-350.037	-313.302	-432.572	-421.154	-488.978	-299.589	-469.812	-549.89
			191.788	-86.2339	-244.499	-136.682	-99.9464	-219.216	-207.798	-275.623	-86.2339	-256.456	-336.534
			-278.022	-436.287	-328.47	-291.735	-411.005	-399.587	-467.411	-278.022	-448.245	-528.323
			-158.265	-50.4477	-13.7126	-132.983	-121.565	-189.389	0	-170.222	-250.3
			107.817	144.552	25.2823	36.7003	-31.124	158.265	-11.9576	-92.0356
			36.7352	-82.5348	-71.1168	-138.941	50.4477	-119.775	-199.853
			-119.27	-107.852	-175.676	13.7126	-156.51	-236.588
			11.418	-56.4063	132.983	-37.2399	-117.318
			-67.8243	121.565	-48.6579	-128.736
			189.389	19.1664	-60.9116
			-170.222	-250.3
			-80.078
MT#15 (6)			-590.405	-1332.78	-1921.86	-2709.34	-3457.69	-4149.15	-5014.45	-5778.45	-5839	-6444.86	-6887.34	-7287.8	-7644.68	-8122.69
			-742.374	-1331.45	-2118.93	-2867.29	-3558.74	-4424.05	-5188.05	-5248.59	-5854.45	-6296.93	-6697.39	-7054.28	-7532.29
			-589.08	-1376.56	-2124.91	-2816.37	-3681.67	-4445.68	-4506.22	-5112.08	-5554.56	-5955.02	-6311.9	-6789.91
			-787.479	-1535.83	-2227.29	-3092.59	-3856.6	-3917.14	-4523	-4965.48	-5365.94	-5722.82	-6200.83
			-748.353	-1439.81	-2305.11	-3069.12	-3129.66	-3735.52	-4178	-4578.46	-4935.34	-5413.35
			-691.458	-1556.76	-2320.76	-2381.31	-2987.17	-3429.65	-3830.11	-4186.99	-4665
			-865.303	-1629.31	-1689.85	-2295.71	-2738.19	-3138.65	-3495.53	-3973.54
			-764.004	-824.545	-1430.41	-1872.88	-2273.35	-2630.23	-3108.24
			-60.5413	-666.404	-1108.88	-1509.34	-1866.23	-2344.24
			-605.863	-1048.34	-1448.8	-1805.68	-2283.7
			-442.476	-842.94	-1199.82	-1677.83
			-400.464	-757.345	-1235.36
			-356.881	-834.893
			-478.011
MT#16 (1)			-148.209	-577.744	-988.338	-1291.18	-1917.99	-2272.39	-2540.75	-2955.7	-3599.24	-4235.23	-4562.72	-4928.06	-5115.55
			-429.535	-840.129	-1142.97	-1769.78	-2124.18	-2392.55	-2807.49	-3451.03	-4087.02	-4414.51	-4779.85	-4967.34
			-410.594	-713.438	-1340.25	-1694.65	-1963.01	-2377.95	-3021.5	-3657.49	-3984.97	-4350.31	-4537.8
			-302.844	-929.653	-1284.06	-1552.42	-1967.36	-2610.9	-3246.89	-3574.38	-3939.72	-4127.21
			-626.809	-981.211	-1249.57	-1664.51	-2308.06	-2944.05	-3271.53	-3636.88	-3824.37
			-354.403	-622.764	-1037.71	-1681.25	-2317.24	-2644.72	-3010.07	-3197.56
			-268.362	-683.302	-1326.85	-1962.84	-2290.32	-2655.66	-2843.15
			-414.941	-1058.49	-1694.48	-2021.96	-2387.3	-2574.79
			-643.546	-1279.53	-1607.02	-1972.36	-2159.85
			-635.989	-963.474	-1328.82	-1516.31
			-327.485	-692.828	-880.318
			-365.343	-552.833
			-187.49
MT#16 (2)			-386.255	-821.941	-1465.37	-2383.68	-2731.83
			-435.685	-1079.11	-1997.42	-2345.57
			-643.426	-1561.74	-1909.89
			-918.312	-1266.46
			-348.148
MT#16 (3)			-428.528	-956.259	-1333.67	-1862.58
			-527.732	-905.141	-1434.05
			-377.409	-906.323
			-528.913
MT#16 (4)			-595.975	-1061.68	-1631.99	-2019.79	-2860.32	-3225.71	-3457.94	-3793.58	-4409.9	-5020.12	-5378.33	-6180.91	-6477.03	-6942.58	-7684.23	-8367.64	-8850.64	-9272.96	-9718.29	-10207.9	-10653.6	-11207.7	-12142	-12638.3	-12977.6	-13319.5	-13881.8	-14068.7
			-465.701	-1036.02	-1423.82	-2264.35	-2629.74	-2861.96	-3197.6	-3813.93	-4424.14	-4782.36	-5584.93	-5881.06	-6346.61	-7088.25	-7771.67	-8254.67	-8676.98	-9122.31	-9611.93	-10057.6	-10611.7	-11546	-12042.3	-12381.7	-12723.5	-13285.8	-13472.7
			-570.315	-958.119	-1798.65	-2164.04	-2396.26	-2731.9	-3348.23	-3958.44	-4316.66	-5119.23	-5415.36	-5880.91	-6622.55	-7305.97	-7788.97	-8211.28	-8656.61	-9146.23	-9591.93	-10146	-11080.3	-11576.6	-11916	-12257.8	-12820.1	-13007
			-387.804	-1228.33	-1593.72	-1825.94	-2161.59	-2777.91	-3388.12	-3746.34	-4548.92	-4845.04	-5310.59	-6052.24	-6735.65	-7218.65	-7640.97	-8086.3	-8575.92	-9021.62	-9575.67	-10510	-11006.3	-11345.7	-11687.5	-12249.8	-12436.7
			-840.526	-1205.92	-1438.14	-1773.78	-2390.11	-3000.32	-3358.54	-4161.11	-4457.24	-4922.79	-5664.43	-6347.85	-6830.85	-7253.16	-7698.49	-8188.11	-8633.81	-9187.86	-10122.2	-10618.5	-10957.9	-11299.7	-11862	-12048.9
			-365.39	-597.614	-933.256	-1549.58	-2159.79	-2518.01	-3320.59	-3616.71	-4082.26	-4823.91	-5507.32	-5990.32	-6412.64	-6857.97	-7347.59	-7793.29	-8347.34	-9281.64	-9777.96	-10117.3	-10459.2	-11021.5	-11208.4
			-232.224	-567.866	-1184.19	-1794.4	-2152.62	-2955.2	-3251.32	-3716.87	-4458.52	-5141.93	-5624.93	-6047.25	-6492.58	-6982.2	-7427.89	-7981.95	-8916.25	-9412.57	-9751.94	-10093.8	-10656.1	-10843
			-335.642	-951.968	-1562.18	-1920.4	-2722.97	-3019.1	-3484.65	-4226.29	-4909.71	-5392.71	-5815.02	-6260.35	-6749.97	-7195.67	-7749.72	-8684.02	-9180.35	-9519.71	-9861.58	-10423.9	-10610.8
			-616.326	-1226.54	-1584.76	-2387.33	-2683.46	-3149	-3890.65	-4574.07	-5057.07	-5479.38	-5924.71	-6414.33	-6860.03	-7414.08	-8348.38	-8844.71	-9184.07	-9525.94	-10088.2	-10275.1
			-610.213	-968.43	-1771.01	-2067.13	-2532.68	-3274.33	-3957.74	-4440.74	-4863.05	-5308.39	-5798	-6243.7	-6797.76	-7732.05	-8228.38	-8567.74	-8909.61	-9471.89	-9658.81
			-358.218	-1160.79	-1456.92	-1922.47	-2664.11	-3347.53	-3830.53	-4252.84	-4698.17	-5187.79	-5633.49	-6187.54	-7121.84	-7618.17	-7957.53	-8299.4	-8861.68	-9048.6
			-802.575	-1098.7	-1564.25	-2305.89	-2989.31	-3472.31	-3894.62	-4339.96	-4829.57	-5275.27	-5829.33	-6763.62	-7259.95	-7599.31	-7941.18	-8503.46	-8690.38
			-296.127	-761.674	-1503.32	-2186.74	-2669.74	-3092.05	-3537.38	-4027	-4472.7	-5026.75	-5961.05	-6457.38	-6796.74	-7138.61	-7700.89	-7887.81
			-465.547	-1207.19	-1890.61	-2373.61	-2795.92	-3241.25	-3730.87	-4176.57	-4730.62	-5664.92	-6161.25	-6500.61	-6842.48	-7404.76	-7591.68
			-741.646	-1425.06	-1908.06	-2330.37	-2775.71	-3265.33	-3711.02	-4265.08	-5199.38	-5695.7	-6035.07	-6376.93	-6939.21	-7126.13
			-683.416	-1166.42	-1588.73	-2034.06	-2523.68	-2969.38	-3523.43	-4457.73	-4954.06	-5293.42	-5635.29	-6197.57	-6384.49
			-483	-905.313	-1350.64	-1840.26	-2285.96	-2840.01	-3774.31	-4270.64	-4610	-4951.87	-5514.15	-5701.07
			-422.313	-867.645	-1357.26	-1802.96	-2357.01	-3291.31	-3787.64	-4127	-4468.87	-5031.15	-5218.07
			-445.332	-934.951	-1380.65	-1934.7	-2869	-3365.33	-3704.69	-4046.56	-4608.84	-4795.76
			-489.619	-935.317	-1489.37	-2423.67	-2920	-3259.36	-3601.22	-4163.5	-4350.43
			-445.698	-999.751	-1934.05	-2430.38	-2769.74	-3111.61	-3673.89	-3860.81
			-554.053	-1488.35	-1984.68	-2324.04	-2665.91	-3228.19	-3415.11
			-934.299	-1430.62	-1769.99	-2111.85	-2674.13	-2861.06
			-496.326	-835.69	-1177.56	-1739.84	-1926.76
			-339.364	-681.23	-1243.51	-1430.43
			-341.866	-904.146	-1091.07
			-562.28	-749.201
			-186.921
MT#16 (5)			-381.583	-889	-1316.55	-1824.72	-2230.65	-2395.16	-2689.54
			-507.417	-934.965	-1443.13	-1849.07	-2013.58	-2307.96
			-427.548	-935.716	-1341.65	-1506.16	-1800.54
			-508.168	-914.101	-1078.61	-1372.99
			-405.933	-570.444	-864.823
			-164.511	-458.89
			-294.379
MT#16 (6)			-743.508	-1383.74	-1937.79	-2738.96	-3405.77	-3928.64	-4547.52	-5198.26	-5812.21	-6170	-7263.29	-7645.43	-8089.7	-8594.98	-9082.5	-9779.09	-10308.2
			-640.23	-1194.29	-1995.46	-2662.26	-3185.13	-3804.01	-4454.75	-5068.7	-5426.49	-6519.78	-6901.92	-7346.19	-7851.48	-8338.99	-9035.58	-9564.72
			-554.057	-1355.23	-2022.03	-2544.9	-3163.78	-3814.52	-4428.47	-4786.26	-5879.55	-6261.69	-6705.96	-7211.25	-7698.76	-8395.35	-8924.49
			-801.17	-1467.97	-1990.85	-2609.72	-3260.46	-3874.42	-4232.2	-5325.5	-5707.63	-6151.9	-6657.19	-7144.7	-7841.3	-8370.44
			-666.802	-1189.68	-1808.55	-2459.29	-3073.25	-3431.03	-4524.33	-4906.46	-5350.73	-5856.02	-6343.53	-7040.13	-7569.27
			-522.875	-1141.75	-1792.49	-2406.44	-2764.23	-3857.52	-4239.66	-4683.93	-5189.22	-5676.73	-6373.32	-6902.46
			-618.878	-1269.62	-1883.57	-2241.36	-3334.65	-3716.79	-4161.06	-4666.34	-5153.86	-5850.45	-6379.59
			-650.738	-1264.69	-1622.48	-2715.77	-3097.91	-3542.18	-4047.47	-4534.98	-5231.57	-5760.71
			-613.953	-971.742	-2065.03	-2447.17	-2891.44	-3396.73	-3884.24	-4580.83	-5109.97
			-357.789	-1451.08	-1833.22	-2277.49	-2782.77	-3270.29	-3966.88	-4496.02
			-1093.29	-1475.43	-1919.7	-2424.99	-2912.5	-3609.09	-4138.23
			-382.138	-826.406	-1331.69	-1819.21	-2515.8	-3044.94
			-444.268	-949.555	-1437.07	-2133.66	-2662.8
			-505.287	-992.801	-1689.39	-2218.53
			-487.513	-1184.11	-1713.25
			-696.593	-1225.73
			-529.139
MT#17 (1)			-486.905	-1314.38	-1929.73	-2523.79	-3073.31	-3402.56	-4265.56	-4809.5	-5346.93	-6035.47	-6464.94	-6876.02	-7141.24	-7497.84	-8171.51	-9043.21	-9428	-9972.05	-10574.1	-11273.8	-12171.9	-12975.2	-13725.9	-14367.8
			-827.473	-1442.82	-2036.88	-2586.41	-2915.65	-3778.65	-4322.6	-4860.02	-5548.57	-5978.03	-6389.11	-6654.33	-7010.94	-7684.6	-8556.3	-8941.09	-9485.14	-10087.2	-10786.9	-11685	-12488.3	-13239	-13880.9
			-615.348	-1209.41	-1758.93	-2088.18	-2951.18	-3495.13	-4032.55	-4721.1	-5150.56	-5561.64	-5826.86	-6183.46	-6857.13	-7728.83	-8113.62	-8657.67	-9259.72	-9959.4	-10857.5	-11660.8	-12411.5	-13053.4
			-594.062	-1143.59	-1472.83	-2335.83	-2879.78	-3417.2	-4105.75	-4535.21	-4946.29	-5211.51	-5568.11	-6241.78	-7113.48	-7498.27	-8042.32	-8644.38	-9344.05	-10242.1	-11045.4	-11796.2	-12438.1
			-549.523	-878.77	-1741.77	-2285.72	-2823.14	-3511.69	-3941.15	-4352.23	-4617.45	-4974.05	-5647.72	-6519.42	-6904.21	-7448.26	-8050.31	-8749.99	-9648.08	-10451.4	-11202.1	-11844
			-329.247	-1192.25	-1736.19	-2273.62	-2962.16	-3391.63	-3802.71	-4067.93	-4424.53	-5098.19	-5969.89	-6354.68	-6898.74	-7500.79	-8200.47	-9098.55	-9901.85	-10652.6	-11294.5
			-863	-1406.95	-1944.37	-2632.92	-3062.38	-3473.46	-3738.68	-4095.28	-4768.95	-5640.65	-6025.44	-6569.49	-7171.54	-7871.22	-8769.31	-9572.6	-10323.4	-10965.2
			-543.946	-1081.37	-1769.92	-2199.38	-2610.46	-2875.68	-3232.28	-3905.95	-4777.65	-5162.44	-5706.49	-6308.54	-7008.22	-7906.31	-8709.6	-9460.35	-10102.2
			-537.425	-1225.97	-1655.43	-2066.51	-2331.73	-2688.34	-3362	-4233.7	-4618.49	-5162.55	-5764.6	-6464.27	-7362.36	-8165.66	-8916.41	-9558.3
			-688.544	-1118.01	-1529.09	-1794.31	-2150.91	-2824.58	-3696.28	-4081.07	-4625.12	-5227.17	-5926.85	-6824.94	-7628.23	-8378.98	-9020.87
			-429.464	-840.544	-1105.76	-1462.37	-2136.03	-3007.73	-3392.52	-3936.58	-4538.63	-5238.3	-6136.39	-6939.69	-7690.44	-8332.33
			-411.08	-676.299	-1032.9	-1706.57	-2578.27	-2963.06	-3507.11	-4109.16	-4808.84	-5706.93	-6510.22	-7260.97	-7902.86
			-265.219	-621.822	-1295.49	-2167.19	-2551.98	-3096.03	-3698.08	-4397.76	-5295.85	-6099.14	-6849.89	-7491.78
			-356.603	-1030.27	-1901.97	-2286.76	-2830.81	-3432.87	-4132.54	-5030.63	-5833.93	-6584.67	-7226.56
			-673.666	-1545.37	-1930.15	-2474.21	-3076.26	-3775.94	-4674.02	-5477.32	-6228.07	-6869.96
			-871.7	-1256.49	-1800.54	-2402.6	-3102.27	-4000.36	-4803.66	-5554.4	-6196.29
			-384.789	-928.844	-1530.9	-2230.57	-3128.66	-3931.96	-4682.71	-5324.59
			-544.055	-1146.11	-1845.78	-2743.87	-3547.17	-4297.92	-4939.81
			-602.053	-1301.73	-2199.82	-3003.11	-3753.86	-4395.75
			-699.675	-1597.76	-2401.06	-3151.81	-3793.7
			-898.088	-1701.39	-2452.13	-3094.02
			-803.298	-1554.05	-2195.94
			-750.748	-1392.64
			-641.89
MT#17 (2)			-582.452	-1199.11	-1923.58	-2682.24	-3185.14	-3738.38	-4375.18	-5261.39	-6035.97	-6817.72	-7539.62	-8161.75	-8724.08	-9471.26	-10018.8	-10939.6	-11712.8
			-616.662	-1341.13	-2099.79	-2602.69	-3155.93	-3792.73	-4678.94	-5453.52	-6235.27	-6957.17	-7579.3	-8141.63	-8888.81	-9436.33	-10357.1	-11130.3
			-724.47	-1483.12	-1986.03	-2539.27	-3176.07	-4062.28	-4836.85	-5618.61	-6340.51	-6962.64	-7524.97	-8272.15	-8819.66	-9740.47	-10513.7
			-758.653	-1261.56	-1814.8	-2451.6	-3337.81	-4112.38	-4894.14	-5616.04	-6238.17	-6800.5	-7547.68	-8095.19	-9016	-9789.19
			-502.906	-1056.14	-1692.94	-2579.16	-3353.73	-4135.48	-4857.38	-5479.52	-6041.84	-6789.03	-7336.54	-8257.35	-9030.53
			-553.238	-1190.04	-2076.25	-2850.82	-3632.58	-4354.48	-4976.61	-5538.94	-6286.12	-6833.64	-7754.44	-8527.63
			-636.798	-1523.01	-2297.59	-3079.34	-3801.24	-4423.37	-4985.7	-5732.88	-6280.4	-7201.2	-7974.39
			-886.214	-1660.79	-2442.54	-3164.44	-3786.57	-4348.9	-5096.08	-5643.6	-6564.4	-7337.59
			-774.574	-1556.33	-2278.23	-2900.36	-3462.69	-4209.87	-4757.39	-5678.19	-6451.38
			-781.755	-1503.65	-2125.79	-2688.11	-3435.29	-3982.81	-4903.62	-5676.8
			-721.9	-1344.03	-1906.36	-2653.54	-3201.06	-4121.86	-4895.05
			-622.131	-1184.46	-1931.64	-2479.16	-3399.96	-4173.15
			-562.329	-1309.51	-1857.03	-2777.83	-3551.02
			-747.18	-1294.7	-2215.5	-2988.69
			-547.517	-1468.32	-2241.51
			-920.806	-1693.99
			-773.185
MT#18 (2)			-483.142	-918.947	-1481.06	-2307.2	-2701.1	-3464.68	-4106.36	-4517.73	-4794.31	-5015.44	-5123.29
			-435.805	-997.92	-1824.06	-2217.96	-2981.54	-3623.22	-4034.58	-4311.17	-4532.3	-4640.15
			-562.114	-1388.25	-1782.15	-2545.73	-3187.41	-3598.78	-3875.36	-4096.49	-4204.34
			-826.14	-1220.04	-1983.62	-2625.3	-3036.66	-3313.25	-3534.38	-3642.23
			-393.9	-1157.48	-1799.16	-2210.52	-2487.11	-2708.24	-2816.09
			-763.578	-1405.26	-1816.62	-2093.21	-2314.34	-2422.19
			-641.682	-1053.05	-1329.63	-1550.76	-1658.61
			-411.365	-687.95	-909.077	-1016.93
			-276.585	-497.712	-605.566
			-221.127	-328.981
			-107.854
MT#19 (1)			-657.57	-1206.69	-1698.17	-2268.48	-2502.1	-2527.8
			-549.116	-1040.6	-1610.91	-1844.53	-1870.23
			-491.487	-1061.79	-1295.42	-1321.11
			-570.302	-803.929	-829.626
			-233.627	-259.323
			-25.6968
MT#21 (1)			-564.88	-1012.99	-1712.36	-2386.62	-3122.22	-3696.99	-4155.67	-4574.63	-4766.26	-5385.69	-5826.8	-6639.54	-7122.68	-7421.43	-7663.78	-7798.01
			-448.112	-1147.48	-1821.74	-2557.34	-3132.11	-3590.79	-4009.75	-4201.38	-4820.81	-5261.92	-6074.66	-6557.8	-6856.55	-7098.9	-7233.13
			-699.369	-1373.62	-2109.23	-2683.99	-3142.68	-3561.64	-3753.26	-4372.7	-4813.8	-5626.54	-6109.69	-6408.44	-6650.79	-6785.01
			-674.254	-1409.86	-1984.63	-2443.31	-2862.27	-3053.89	-3673.33	-4114.43	-4927.18	-5410.32	-5709.07	-5951.42	-6085.64
			-735.606	-1310.37	-1769.05	-2188.02	-2379.64	-2999.07	-3440.18	-4252.92	-4736.07	-5034.82	-5277.17	-5411.39
			-574.765	-1033.45	-1452.41	-1644.03	-2263.47	-2704.57	-3517.32	-4000.46	-4299.21	-4541.56	-4675.78
			-458.682	-877.644	-1069.27	-1688.7	-2129.81	-2942.55	-3425.7	-3724.45	-3966.79	-4101.02
			-418.962	-610.588	-1230.02	-1671.13	-2483.87	-2967.02	-3265.77	-3508.11	-3642.34
			-191.626	-811.059	-1252.17	-2064.91	-2548.05	-2846.8	-3089.15	-3223.38
			-619.434	-1060.54	-1873.28	-2356.43	-2655.18	-2897.53	-3031.75
			-441.106	-1253.85	-1736.99	-2035.74	-2278.09	-2412.32
			-812.741	-1295.89	-1594.64	-1836.99	-1971.21
			-483.147	-781.897	-1024.24	-1158.47
			-298.75	-541.097	-675.322
			-242.347	-376.572
			-134.225
MT#1 (1)			108.983	-56.9301	-243.332	-541.414	-1177.08	-1472.9	-1697.28	-1706.49	-1831.93	-2087.51	-2247.79	-2416.34	-2752.09	-2974.75	-3250.14	-3482.62	-3874.94	-3812.12	-3611.07	-3609.82
			-165.913	-352.315	-650.397	-1286.06	-1581.89	-1806.27	-1815.47	-1940.92	-2196.5	-2356.78	-2525.32	-2861.07	-3083.74	-3359.12	-3591.6	-3983.93	-3921.1	-3720.05	-3718.81
			-186.402	-484.484	-1120.15	-1415.97	-1640.35	-1649.56	-1775	-2030.58	-2190.86	-2359.41	-2695.16	-2917.82	-3193.21	-3425.69	-3818.01	-3755.19	-3554.14	-3552.89
			-298.082	-933.749	-1229.57	-1453.95	-1463.16	-1588.6	-1844.18	-2004.46	-2173.01	-2508.76	-2731.42	-3006.81	-3239.29	-3631.61	-3568.78	-3367.73	-3366.49
			-635.667	-931.489	-1155.87	-1165.08	-1290.52	-1546.1	-1706.38	-1874.93	-2210.67	-2433.34	-2708.73	-2941.2	-3333.53	-3270.7	-3069.65	-3068.41
			-295.822	-520.201	-529.411	-654.852	-910.433	-1070.71	-1239.26	-1575.01	-1797.67	-2073.06	-2305.54	-2697.86	-2635.04	-2433.98	-2432.74
			-224.379	-233.589	-359.03	-614.611	-774.891	-943.437	-1279.19	-1501.85	-1777.24	-2009.72	-2402.04	-2339.21	-2138.16	-2136.92
			-9.20992	-134.65	-390.232	-550.512	-719.057	-1054.81	-1277.47	-1552.86	-1785.34	-2177.66	-2114.83	-1913.78	-1912.54
			-125.441	-381.022	-541.302	-709.847	-1045.6	-1268.26	-1543.65	-1776.13	-2168.45	-2105.62	-1904.57	-1903.33
			-255.581	-415.861	-584.407	-920.156	-1142.82	-1418.21	-1650.69	-2043.01	-1980.18	-1779.13	-1777.89
			-160.28	-328.825	-664.575	-887.239	-1162.63	-1395.1	-1787.43	-1724.6	-1523.55	-1522.31
			-168.546	-504.295	-726.96	-1002.35	-1234.83	-1627.15	-1564.32	-1363.27	-1362.03
			-335.749	-558.414	-833.802	-1066.28	-1458.6	-1395.78	-1194.73	-1193.48
			-222.664	-498.053	-730.53	-1122.86	-1060.03	-858.977	-857.734
			-275.388	-507.866	-900.191	-837.363	-636.312	-635.069
			-232.477	-624.803	-561.974	-360.924	-359.681
			-392.325	-329.497	-128.447	-127.204
			62.8283	263.878	265.121
			201.05	202.293
			1.24291
MT#1 (3)			67.8524	-64.369	299.438	234.299	90.4637	180.927	138.071	277.034	-133.897	-363.668	-868.372
			-132.221	231.585	166.447	22.6113	113.075	70.2186	209.182	-201.749	-431.52	-936.224
			363.807	298.668	154.833	245.296	202.44	341.403	-69.5276	-299.299	-804.003
			-65.1388	-208.974	-118.51	-161.367	-22.4033	-433.334	-663.105	-1167.81
			-143.835	-53.3715	-96.2279	42.7355	-368.195	-597.967	-1102.67
			90.4637	47.6073	186.571	-224.36	-454.131	-958.835
			-42.8564	96.107	-314.824	-544.595	-1049.3
			138.963	-271.968	-501.739	-1006.44
			-410.931	-640.702	-1145.41
			-229.771	-734.475
			-504.704
MT#1 (4)			-246.446	-196.363	-302.042	-158.75	-428.625	-460.375	-413.055	-682.625	-746.294	-920.75	-1016.12	-1112.27	-1174.75	-1175.71	-1397.36	-1478.51	-1413.23	-1667.18	-2095.56	-2207.14	-2238.38	-2127.49	-2063.99	-2207.14	-2206.62
			50.0834	-55.5962	87.6963	-182.179	-213.929	-166.609	-436.179	-499.848	-674.304	-769.678	-865.824	-928.304	-929.269	-1150.91	-1232.06	-1166.79	-1420.73	-1849.11	-1960.69	-1991.93	-1881.04	-1817.55	-1960.69	-1960.18
			-105.68	37.6129	-232.262	-264.012	-216.692	-486.262	-549.931	-724.387	-819.761	-915.907	-978.387	-979.352	-1201	-1282.14	-1216.87	-1470.81	-1899.2	-2010.78	-2042.01	-1931.12	-1867.63	-2010.78	-2010.26
			143.292	-126.583	-158.333	-111.013	-380.583	-444.251	-618.708	-714.082	-810.228	-872.708	-873.673	-1095.32	-1176.46	-1111.19	-1365.13	-1793.52	-1905.1	-1936.33	-1825.44	-1761.95	-1905.1	-1904.58
			-269.875	-301.625	-254.305	-523.875	-587.544	-762	-857.374	-953.52	-1016	-1016.96	-1238.61	-1319.76	-1254.48	-1508.43	-1936.81	-2048.39	-2079.62	-1968.74	-1905.24	-2048.39	-2047.88
			-31.75	15.5698	-254	-317.669	-492.125	-587.499	-683.645	-746.125	-747.09	-968.736	-1049.88	-984.607	-1238.55	-1666.94	-1778.51	-1809.75	-1698.86	-1635.37	-1778.51	-1778
			47.3198	-222.25	-285.919	-460.375	-555.749	-651.895	-714.375	-715.34	-936.986	-1018.13	-952.857	-1206.8	-1635.19	-1746.76	-1778	-1667.11	-1603.62	-1746.76	-1746.25
			-269.57	-333.239	-507.695	-603.069	-699.215	-761.695	-762.66	-984.306	-1065.45	-1000.18	-1254.12	-1682.5	-1794.08	-1825.32	-1714.43	-1650.94	-1794.08	-1793.57
			-63.6689	-238.125	-333.499	-429.645	-492.125	-493.09	-714.736	-795.882	-730.607	-984.552	-1412.94	-1524.51	-1555.75	-1444.86	-1381.37	-1524.51	-1524
			-174.456	-269.83	-365.976	-428.456	-429.421	-651.067	-732.213	-666.938	-920.883	-1349.27	-1460.85	-1492.08	-1381.19	-1317.7	-1460.85	-1460.33
			-95.374	-191.52	-254	-254.965	-476.611	-557.757	-492.482	-746.427	-1174.81	-1286.39	-1317.62	-1206.74	-1143.24	-1286.39	-1285.88
			-96.1461	-158.626	-159.591	-381.237	-462.383	-397.108	-651.053	-1079.44	-1191.01	-1222.25	-1111.36	-1047.87	-1191.01	-1190.5
			-62.4799	-63.4449	-285.091	-366.237	-300.962	-554.907	-983.29	-1094.87	-1126.1	-1015.22	-951.724	-1094.87	-1094.35
			-0.964975	-222.611	-303.757	-238.482	-492.427	-920.81	-1032.39	-1063.62	-952.737	-889.244	-1032.39	-1031.88
			-221.646	-302.792	-237.517	-491.462	-919.845	-1031.42	-1062.66	-951.772	-888.279	-1031.42	-1030.91
			-81.1464	-15.8709	-269.817	-698.199	-809.778	-841.014	-730.126	-666.633	-809.778	-809.264
			65.2755	-188.67	-617.053	-728.632	-759.868	-648.98	-585.487	-728.632	-728.118
			-253.946	-682.328	-793.907	-825.143	-714.255	-650.763	-793.907	-793.393
			-428.383	-539.962	-571.198	-460.31	-396.817	-539.962	-539.448
			-111.579	-142.815	-31.9268	31.5659	-111.579	-111.065
			-31.2361	79.652	143.145	0	0.513879
			110.888	174.381	31.2361	31.75
			63.4927	-79.652	-79.1381
			-143.145	-142.631
			0.513879
MT#1 (5)			-142.875	-498.485	-523.634	-508.248	-644.65	-626.409	-841.974	-810.247	-911.673	-857.397	-1148.39	-1304.17	-1462.66	-1701.29	-1781.47	-1910.35
			-355.61	-380.759	-365.373	-501.775	-483.534	-699.099	-667.372	-768.798	-714.522	-1005.51	-1161.29	-1319.78	-1558.42	-1638.59	-1767.48
			-25.1493	-9.76287	-146.165	-127.924	-343.489	-311.762	-413.188	-358.912	-649.904	-805.683	-964.17	-1202.81	-1282.98	-1411.87
			15.3864	-121.016	-102.775	-318.339	-286.613	-388.039	-333.763	-624.755	-780.533	-939.021	-1177.66	-1257.83	-1386.72
			-136.402	-118.161	-333.726	-301.999	-403.425	-349.149	-640.141	-795.92	-954.407	-1193.05	-1273.22	-1402.1
			18.241	-197.324	-165.597	-267.023	-212.747	-503.739	-659.518	-818.005	-1056.64	-1136.82	-1265.7
			-215.565	-183.838	-285.264	-230.988	-521.98	-677.759	-836.246	-1074.88	-1155.06	-1283.94
			31.7265	-69.6991	-15.4231	-306.415	-462.194	-620.681	-859.32	-939.495	-1068.38
			-101.426	-47.1497	-338.142	-493.92	-652.408	-891.046	-971.222	-1100.1
			54.276	-236.716	-392.495	-550.982	-789.621	-869.796	-998.677
			-290.992	-446.771	-605.258	-843.896	-924.072	-1052.95
			-155.779	-314.266	-552.904	-633.08	-761.961
			-158.488	-397.126	-477.302	-606.183
			-238.638	-318.814	-447.695
			-80.1758	-209.057
			-128.881
MT#1 (6)			-401.923	-698.68	-1079.62	-1637.05	-2144.59	-2572.53
			-296.757	-677.694	-1235.13	-1742.67	-2170.61
			-380.936	-938.37	-1445.91	-1873.85
			-557.434	-1064.98	-1492.92
			-507.544	-935.483
			-427.939
MT#1 (7)			-496.205	-984.25	-1335.01	-1794.16	-2206.85	-2540.2	-3413.16	-3921.16	-4350.47
			-488.045	-838.806	-1297.95	-1710.65	-2043.99	-2916.96	-3424.95	-3854.27
			-350.761	-809.906	-1222.6	-1555.95	-2428.91	-2936.91	-3366.22
			-459.145	-871.842	-1205.19	-2078.15	-2586.15	-3015.46
			-412.697	-746.042	-1619.01	-2127	-2556.32
			-333.345	-1206.31	-1714.3	-2143.62
			-872.963	-1380.96	-1810.28
			-507.995	-937.312
			-429.317
MT#1 (8)			-698.68	-1587.58	-2000.31	-2479.75	-3178.21	-3652.11	-4084.32	-4861.48	-5514.48	-6166.12	-6687.62	-7213.56	-8134.83	-8596.13	-9087.21
			-888.899	-1301.63	-1781.07	-2479.53	-2953.43	-3385.64	-4162.8	-4815.8	-5467.44	-5988.94	-6514.88	-7436.15	-7897.45	-8388.53
			-412.734	-892.175	-1590.63	-2064.53	-2496.74	-3273.9	-3926.9	-4578.55	-5100.04	-5625.98	-6547.25	-7008.55	-7499.63
			-479.441	-1177.9	-1651.8	-2084.01	-2861.17	-3514.16	-4165.81	-4687.3	-5213.25	-6134.52	-6595.82	-7086.9
			-698.459	-1172.36	-1604.57	-2381.73	-3034.72	-3686.37	-4207.86	-4733.8	-5655.08	-6116.38	-6607.46
			-473.9	-906.107	-1683.27	-2336.26	-2987.91	-3509.4	-4035.35	-4956.62	-5417.92	-5909
			-432.207	-1209.37	-1862.37	-2514.01	-3035.5	-3561.45	-4482.72	-4944.02	-5435.1
			-777.164	-1430.16	-2081.8	-2603.3	-3129.24	-4050.51	-4511.81	-5002.89
			-652.994	-1304.64	-1826.13	-2352.07	-3273.35	-3734.65	-4225.73
			-651.647	-1173.14	-1699.08	-2620.36	-3081.66	-3572.74
			-521.491	-1047.43	-1968.71	-2430.01	-2921.09
			-525.943	-1447.22	-1908.52	-2399.6
			-921.275	-1382.57	-1873.66
			-461.299	-952.38
			-491.081
MT#1 (9)			-63.5	-161.894	-715.08	-762.165	-826.11	-1143.44	-1970.1	-2510.71	-3179.8	-3718.14	-4258.08	-4859.85	-5335.16
			-98.3939	-651.58	-698.665	-762.61	-1079.94	-1906.6	-2447.21	-3116.3	-3654.64	-4194.58	-4796.35	-5271.66
			-553.186	-600.271	-664.216	-981.547	-1808.21	-2348.82	-3017.9	-3556.25	-4096.19	-4697.96	-5173.26
			-47.0851	-111.03	-428.361	-1255.02	-1795.63	-2464.72	-3003.06	-3543	-4144.77	-4620.08
			-63.945	-381.276	-1207.93	-1748.55	-2417.63	-2955.98	-3495.92	-4097.69	-4572.99
			-317.331	-1143.99	-1684.6	-2353.69	-2892.03	-3431.97	-4033.74	-4509.05
			-826.659	-1367.27	-2036.36	-2574.7	-3114.64	-3716.41	-4191.72
			-540.611	-1209.7	-1748.04	-2287.98	-2889.75	-3365.06
			-669.088	-1207.43	-1747.37	-2349.14	-2824.45
			-538.342	-1078.28	-1680.05	-2155.36
			-539.942	-1141.71	-1617.02
			-601.768	-1077.08
			-475.307
MT#5 (1)			89.8026	21.209	66.9483	-449.013	-888.455	-1375.81	-1977.11	-2189.6	-2186.95	-2012.46	-2207.48	-2666.07	-2718.72	-3081.85	-3236.01	-3445.45	-3454.77	-3456.9	-3521.67	-3775.47	-4377.48	-4709.41	-5274.16	-5436.82	-5593.37	-5613.33	-5779.97	-5944.28	-6172.23	-6553.43	-7088.31	-7371.92	-7473.06	-7555.74
			-68.5936	-22.8543	-538.815	-978.257	-1465.62	-2066.91	-2279.4	-2276.75	-2102.27	-2297.28	-2755.87	-2808.52	-3171.65	-3325.81	-3535.25	-3544.58	-3546.7	-3611.47	-3865.27	-4467.28	-4799.22	-5363.97	-5526.62	-5683.17	-5703.13	-5869.77	-6034.08	-6262.03	-6643.23	-7178.11	-7461.72	-7562.87	-7645.54
			45.7393	-470.222	-909.664	-1397.02	-1998.32	-2210.81	-2208.16	-2033.67	-2228.69	-2687.28	-2739.93	-3103.06	-3257.22	-3466.66	-3475.98	-3478.11	-3542.87	-3796.68	-4398.69	-4730.62	-5295.37	-5458.03	-5614.58	-5634.54	-5801.18	-5965.49	-6193.44	-6574.64	-7109.52	-7393.13	-7494.27	-7576.94
			-515.961	-955.403	-1442.76	-2044.06	-2256.55	-2253.9	-2079.41	-2274.43	-2733.02	-2785.67	-3148.8	-3302.96	-3512.4	-3521.72	-3523.84	-3588.61	-3842.41	-4444.43	-4776.36	-5341.11	-5503.77	-5660.32	-5680.28	-5846.92	-6011.23	-6172.23	-6620.38	-7155.26	-7438.87	-7540.01	-7622.68
			-439.442	-926.8	-1528.09	-1740.59	-1737.93	-1563.45	-1758.47	-2217.05	-2269.71	-2632.84	-2787	-2996.44	-3005.76	-3007.88	-3072.65	-3326.45	-3928.47	-4260.4	-4825.15	-4987.81	-5144.36	-5164.32	-5330.96	-5495.26	-5723.22	-6643.23	-6639.29	-6922.9	-7024.05	-7106.72
			-487.358	-1088.65	-1301.14	-1298.49	-1124.01	-1319.03	-1777.61	-1830.26	-2193.39	-2347.55	-2557	-2566.32	-2568.44	-2633.21	-2887.01	-3489.03	-3820.96	-4385.71	-4548.37	-4704.92	-4724.88	-4891.52	-5055.82	-5283.78	-5664.97	-7109.52	-6483.46	-6584.61	-6667.28
			-601.295	-813.787	-811.135	-636.65	-831.668	-1290.25	-1342.91	-1706.04	-1860.2	-2069.64	-2078.96	-2081.08	-2145.85	-2399.65	-3001.67	-3333.6	-3898.35	-4061.01	-4217.56	-4237.52	-4404.16	-4568.47	-4796.42	-5177.62	-5712.49	-7438.87	-6097.25	-6179.92
			-212.492	-209.84	-35.3556	-230.373	-688.96	-741.611	-1104.74	-1258.9	-1468.34	-1477.67	-1479.79	-1544.56	-1798.36	-2400.37	-2732.31	-3297.06	-3459.71	-3616.26	-3636.22	-3802.86	-3967.17	-4195.12	-4576.32	-5111.2	-5394.81	-7024.05	-5578.63
			2.65179	177.137	-17.8813	-476.467	-529.119	-892.25	-1046.41	-1255.85	-1265.17	-1267.3	-1332.07	-1585.87	-2187.88	-2519.82	-3084.56	-3247.22	-3403.77	-3423.73	-3590.37	-3754.68	-3982.63	-4363.83	-4898.71	-5182.32	-5283.46	-6667.28
			174.485	-20.533	-479.119	-531.771	-894.902	-1049.06	-1258.5	-1267.83	-1269.95	-1334.72	-1588.52	-2190.53	-2522.47	-3087.22	-3249.87	-3406.42	-3426.38	-3593.02	-3757.33	-3985.28	-4366.48	-4901.36	-5184.97	-5286.11	-5368.79
			-195.018	-653.604	-706.256	-1069.39	-1223.55	-1432.99	-1442.31	-1444.43	-1509.2	-1763	-2365.02	-2696.95	-3261.7	-3424.36	-3580.91	-3600.87	-3767.51	-3931.82	-4159.77	-4540.97	-5075.84	-5359.45	-5460.6	-5543.27
			-458.586	-511.238	-874.369	-1028.53	-1237.97	-1247.29	-1249.42	-1314.19	-1567.99	-2170	-2501.93	-3066.68	-3229.34	-3385.89	-3405.85	-3572.49	-3736.8	-3964.75	-4345.95	-4880.83	-5164.44	-5265.58	-5348.25
			-52.6516	-415.782	-569.942	-779.383	-788.707	-790.829	-855.599	-1109.4	-1711.41	-2043.35	-2608.1	-2770.75	-2927.3	-2947.26	-3113.9	-3278.21	-3506.16	-3887.36	-4422.24	-4705.85	-4807	-4889.67
			-363.131	-517.29	-726.731	-736.055	-738.178	-802.947	-1056.75	-1658.76	-1990.7	-2555.45	-2718.1	-2874.65	-2894.61	-3061.25	-3225.56	-3453.51	-3834.71	-4369.59	-4653.2	-4754.34	-4837.02
			-154.16	-363.6	-372.924	-375.047	-439.816	-693.617	-1295.63	-1627.57	-2192.31	-2354.97	-2511.52	-2531.48	-2698.12	-2862.43	-3090.38	-3471.58	-4006.46	-4290.07	-4391.21	-4473.89
			-209.441	-218.765	-220.887	-285.657	-539.458	-1141.47	-1473.41	-2038.16	-2200.81	-2357.36	-2377.32	-2543.96	-2708.27	-2936.22	-3317.42	-3852.3	-4135.91	-4237.05	-4319.73
			-9.32387	-11.4464	-76.2161	-330.017	-932.032	-1263.97	-1828.71	-1991.37	-2147.92	-2167.88	-2334.52	-2498.83	-2726.78	-3107.98	-3642.86	-3926.47	-4027.61	-4110.29
			-2.12253	-66.8922	-320.693	-922.708	-1254.64	-1819.39	-1982.05	-2138.6	-2158.56	-2325.2	-2489.5	-2717.46	-3098.65	-3633.53	-3917.14	-4018.29	-4100.96
			-64.7697	-318.57	-920.585	-1252.52	-1817.27	-1979.93	-2136.47	-2156.43	-2323.07	-2487.38	-2715.33	-3096.53	-3631.41	-3915.02	-4016.17	-4098.84
			-253.801	-855.815	-1187.75	-1752.5	-1915.16	-2071.7	-2091.67	-2258.3	-2422.61	-2650.56	-3031.76	-3566.64	-3850.25	-3951.4	-4034.07
			-602.015	-933.948	-1498.7	-1661.36	-1817.9	-1837.86	-2004.5	-2168.81	-2396.76	-2777.96	-3312.84	-3596.45	-3697.6	-3780.27
			-331.933	-896.683	-1059.34	-1215.89	-1235.85	-1402.49	-1566.8	-1794.75	-2175.95	-2710.83	-2994.44	-3095.58	-3178.25
			-564.75	-727.407	-883.956	-903.916	-1070.55	-1234.86	-1462.82	-1844.01	-2378.89	-2662.5	-2763.65	-2846.32
			-162.658	-319.206	-339.167	-505.805	-670.114	-898.066	-1279.26	-1814.14	-2097.75	-2198.9	-2281.57
			-156.549	-176.509	-343.148	-507.456	-735.409	-1116.61	-1651.49	-1935.1	-2036.24	-2118.91
			-19.9603	-186.599	-350.907	-578.86	-960.058	-1494.94	-1778.55	-1879.69	-1962.36
			-166.639	-330.947	-558.9	-940.097	-1474.98	-1758.59	-1859.73	-1942.4
			-164.308	-392.261	-773.459	-1308.34	-1591.95	-1693.09	-1775.77
			-227.953	-609.15	-1144.03	-1427.64	-1528.78	-1611.46
			-381.198	-916.077	-1199.69	-1300.83	-1383.5
			-534.879	-818.489	-919.634	-1002.31
			-283.61	-384.755	-467.428
			-101.145	-183.818
			-82.6729
MT#5 (2)			-282.44	-1032.05	-1685.93	-2185.44	-2812.08	-3417.32	-3974.75	-4262.48	-4473.93
			-749.607	-1403.49	-1903	-2529.65	-3134.88	-3692.31	-3980.04	-4191.49
			-653.879	-1153.39	-1780.04	-2385.28	-2942.71	-3230.43	-3441.89
			-499.511	-1126.16	-1731.4	-2288.83	-2576.55	-2788.01
			-626.648	-1231.88	-1789.32	-2077.04	-2288.5
			-605.237	-1162.67	-1450.39	-1661.85
			-557.43	-845.156	-1056.61
			-287.726	-499.182
			-211.456
MT#5 (3)			-728.414	-1202.24	-1709.79	-2352.93	-2755.69	-3340.41	-3864.78	-4736.34	-5268.3	-6407.08
			-473.827	-981.376	-1624.52	-2027.28	-2612	-3136.37	-4007.93	-4539.89	-5678.66
			-507.549	-1150.69	-1553.45	-2138.17	-2662.54	-3534.1	-4066.06	-5204.84
			-643.14	-1045.9	-1630.62	-2154.99	-3026.55	-3558.51	-4697.29
			-402.761	-987.483	-1511.85	-2383.41	-2915.37	-4054.15
			-584.722	-1109.09	-1980.65	-2512.61	-3651.39
			-524.37	-1395.93	-1927.89	-3066.66
			-871.562	-1403.52	-2542.29
			-531.957	-1670.73
			-1138.78
MT#5 (4)			-161.123	-734.686	-529.179	-577.744	-696.2	-847.196	-975.744	-950.575	-934.382	-867.751	-883.865	-796.803	-1062.92	-1155.06	-1058.36	-1088.35	-1207.96	-1407.14	-1370.78	-1427.57	-1324.67	-1198.33	-1401.58	-1486.2	-1694.39	-1776.91	-1796.98	-1756.32	-1767.85	-1925.18	-1935.52	-1853.18	-2325.8	-2454.16	-2541.59	-2741.93	-2638.63	-2679.82	-2879.99	-3163.67	-3244.54	-3285.96	-3393.65	-3475.61	-3445.48	-3639.78	-3732.19
			-573.564	-368.056	-416.621	-535.077	-686.073	-814.622	-789.452	-773.259	-706.628	-722.742	-635.68	-901.793	-993.934	-897.234	-927.223	-1046.84	-1246.02	-1209.65	-1266.45	-1163.55	-1037.21	-1240.46	-1325.08	-1533.27	-1615.79	-1635.86	-1595.2	-1606.73	-1764.05	-1774.4	-1692.06	-2164.68	-2293.03	-2380.46	-2580.81	-2477.51	-2518.7	-2718.87	-3002.55	-3083.42	-3124.84	-3232.53	-3314.49	-3284.36	-3478.66	-3571.07	-3689.32
			205.508	156.943	38.4865	-112.509	-241.058	-215.889	-199.696	-133.064	-149.178	-62.1164	-328.229	-420.37	-323.671	-353.659	-473.273	-672.457	-636.09	-692.886	-589.986	-463.642	-666.896	-751.517	-959.705	-1042.22	-1062.29	-1021.64	-1033.16	-1190.49	-1200.84	-1118.49	-1591.11	-1719.47	-1806.9	-2007.25	-1903.94	-1945.13	-2145.3	-2428.98	-2509.85	-2551.27	-2658.97	-2740.92	-2710.8	-2905.1	-2997.51	-3115.76	-3326.08
			-48.5652	-167.021	-318.017	-446.566	-421.397	-405.204	-338.572	-354.686	-267.624	-533.737	-625.878	-529.179	-559.167	-678.781	-877.965	-841.598	-898.393	-795.494	-669.149	-872.404	-957.025	-1165.21	-1247.73	-1267.8	-1227.14	-1767.85	-1396	-1406.34	-1324	-1796.62	-1924.98	-2012.41	-2212.75	-2109.45	-2150.64	-2350.81	-2634.49	-2715.36	-2756.78	-2864.47	-2946.43	-2916.3	-3110.61	-3203.01	-3321.26	-3531.59	-3778.08
			-118.456	-269.452	-398.001	-372.831	-356.638	-290.007	-306.121	-219.059	-485.172	-577.313	-480.613	-510.602	-630.215	-829.4	-793.033	-849.828	-746.928	-620.584	-823.839	-908.46	-1116.65	-1199.17	-1219.23	-1178.58	-1190.11	-1764.05	-1357.78	-1275.44	-1748.06	-1876.41	-1963.84	-2164.19	-2060.89	-2102.08	-2302.25	-2585.92	-2666.8	-2708.22	-2815.91	-2897.87	-2867.74	-3062.04	-3154.45	-3272.7	-3483.02	-3729.51	-3879.57
			-150.996	-279.544	-254.375	-238.182	-171.551	-187.665	-100.603	-366.716	-458.856	-362.157	-392.145	-511.759	-710.944	-674.577	-731.372	-628.472	-502.128	-705.382	-790.003	-998.191	-1080.71	-1100.78	-1060.12	-1071.65	-1228.98	-1200.84	-1156.98	-1629.6	-1757.96	-1845.39	-2045.73	-1942.43	-1983.62	-2183.79	-2467.47	-2548.34	-2589.76	-2697.45	-2779.41	-2749.28	-2943.58	-3035.99	-3154.24	-3364.57	-3611.06	-3761.11	-3898.73
			-128.549	-103.38	-87.1865	-20.5551	-36.6692	50.3928	-215.72	-307.861	-211.161	-241.15	-360.764	-559.948	-523.581	-580.376	-477.477	-351.132	-554.387	-639.008	-847.196	-929.713	-949.782	-909.128	-920.656	-1077.98	-1088.33	-1324	-1478.6	-1606.96	-1694.39	-1894.74	-1791.43	-1832.62	-2032.79	-2316.47	-2397.34	-2438.77	-2546.46	-2628.42	-2598.29	-2792.59	-2885	-3003.25	-3213.57	-3460.06	-3610.12	-3747.74	-4168.92
			25.1691	41.3622	107.994	91.8795	178.941	-87.1714	-179.312	-82.6127	-112.601	-232.215	-431.399	-395.032	-451.828	-348.928	-222.584	-425.838	-510.459	-718.647	-801.165	-821.234	-780.579	-792.107	-949.431	-959.779	-877.436	-1748.06	-1478.41	-1565.84	-1766.19	-1662.89	-1704.08	-1904.24	-2187.92	-2268.8	-2310.22	-2417.91	-2499.87	-2469.74	-2664.04	-2756.45	-2874.7	-3085.02	-3331.51	-3481.57	-3619.19	-4040.37	-4138.73
			16.1931	82.8245	66.7103	153.772	-112.341	-204.481	-107.782	-137.77	-257.384	-456.569	-420.201	-476.997	-374.097	-247.753	-451.007	-535.628	-743.816	-826.334	-846.403	-805.748	-817.276	-974.6	-984.948	-902.605	-1375.22	-1757.96	-1591.01	-1791.36	-1688.05	-1729.25	-1929.41	-2213.09	-2293.97	-2335.39	-2443.08	-2525.04	-2494.91	-2689.21	-2781.62	-2899.87	-3110.19	-3356.68	-3506.74	-3644.36	-4065.54	-4163.89	-4236.38
			66.6314	50.5173	137.579	-128.534	-220.674	-123.975	-153.963	-273.577	-472.762	-436.394	-493.19	-390.29	-263.946	-467.2	-551.821	-760.009	-842.527	-862.596	-821.941	-833.469	-990.793	-1001.14	-918.798	-1391.42	-1519.77	-1694.39	-1807.55	-1704.25	-1745.44	-1945.61	-2229.29	-2310.16	-2351.58	-2459.27	-2541.23	-2511.1	-2705.4	-2797.81	-2916.06	-3126.39	-3372.88	-3522.93	-3660.55	-4081.73	-4180.09	-4252.58	-4509.24
			-16.1141	70.9479	-195.165	-287.306	-190.606	-220.595	-340.209	-539.393	-503.026	-559.821	-456.921	-330.577	-533.832	-618.453	-826.641	-909.158	-929.227	-888.572	-900.101	-1057.42	-1067.77	-985.429	-1458.05	-1586.41	-1673.84	-1766.19	-1770.88	-1812.07	-2012.24	-2295.92	-2376.79	-2418.21	-2525.9	-2607.86	-2577.73	-2772.03	-2864.44	-2982.69	-3193.02	-3439.51	-3589.56	-3727.18	-4148.37	-4246.72	-4319.21	-4575.87	-4456.12
			87.062	-179.051	-271.191	-174.492	-204.481	-324.094	-523.279	-486.912	-543.707	-440.807	-314.463	-517.718	-602.338	-810.526	-893.044	-913.113	-872.458	-883.986	-1041.31	-1051.66	-969.315	-1441.93	-1570.29	-1657.72	-1858.07	-1688.05	-1795.96	-1996.12	-2279.8	-2360.68	-2402.1	-2509.79	-2591.75	-2561.62	-2755.92	-2848.33	-2966.58	-3176.9	-3423.39	-3573.45	-3711.07	-4132.25	-4230.6	-4303.09	-4559.76	-4440.01	-4817.62
			-266.113	-358.253	-261.554	-291.543	-411.156	-610.341	-573.974	-630.769	-527.869	-401.525	-604.78	-689.4	-897.588	-980.106	-1000.18	-959.52	-971.048	-1128.37	-1138.72	-1056.38	-1529	-1657.35	-1744.78	-1945.13	-1841.83	-1745.44	-2083.19	-2366.86	-2447.74	-2489.16	-2596.85	-2678.81	-2648.68	-2842.98	-2935.39	-3053.64	-3263.96	-3510.46	-3660.51	-3798.13	-4219.31	-4317.67	-4390.16	-4646.82	-4527.07	-4904.68	-4896.22
			-92.1406	4.5587	-25.4297	-145.044	-344.228	-307.861	-364.656	-261.756	-135.412	-338.667	-423.288	-631.476	-713.993	-734.062	-693.407	-704.936	-862.26	-872.607	-790.264	-1262.88	-1391.24	-1478.67	-1679.02	-1575.71	-1616.9	-2012.24	-2100.75	-2181.62	-2223.05	-2330.74	-2412.7	-2382.57	-2576.87	-2669.28	-2787.53	-2997.85	-3244.34	-3394.4	-3532.02	-3953.2	-4051.55	-4124.04	-4380.7	-4260.96	-4638.57	-4630.1	-4658.96
			96.6993	66.7108	-52.903	-252.087	-215.72	-272.516	-169.616	-43.2717	-246.526	-331.147	-539.335	-621.853	-641.922	-601.267	-612.795	-770.119	-780.467	-698.124	-1170.74	-1299.1	-1386.53	-1586.88	-1483.57	-1524.76	-1724.93	-2279.8	-2089.48	-2130.9	-2238.6	-2320.55	-2290.43	-2484.73	-2577.14	-2695.39	-2905.71	-3152.2	-3302.26	-3439.88	-3861.06	-3959.41	-4031.9	-4288.56	-4168.82	-4546.42	-4537.96	-4566.82	-4616.98
			-29.9884	-149.602	-348.787	-312.42	-369.215	-266.315	-139.971	-343.225	-427.846	-636.034	-718.552	-738.621	-697.966	-709.494	-866.818	-877.166	-794.823	-1267.44	-1395.8	-1483.23	-1683.57	-1580.27	-1621.46	-1821.63	-2105.31	-2447.74	-2227.6	-2335.29	-2417.25	-2387.13	-2581.43	-2673.84	-2792.08	-3002.41	-3248.9	-3398.95	-3536.58	-3957.76	-4056.11	-4128.6	-4385.26	-4265.52	-4643.12	-4634.66	-4663.52	-4713.68	-5067.01
			-119.614	-318.798	-282.431	-339.227	-236.327	-109.983	-313.237	-397.858	-606.046	-688.564	-708.632	-667.978	-679.506	-836.83	-847.177	-764.835	-1237.45	-1365.81	-1453.24	-1653.59	-1550.28	-1591.47	-1791.64	-2075.32	-2156.19	-2223.05	-2305.31	-2387.27	-2357.14	-2551.44	-2643.85	-2762.1	-2972.42	-3218.91	-3368.97	-3506.59	-3927.77	-4026.12	-4098.61	-4355.28	-4235.53	-4613.14	-4604.67	-4633.53	-4683.69	-5037.02	-4621.14
			-199.184	-162.817	-219.613	-116.713	9.63126	-193.623	-278.244	-486.432	-568.95	-589.019	-548.364	-559.892	-717.216	-727.564	-645.221	-1117.84	-1246.2	-1333.63	-1533.97	-1430.67	-1471.86	-1672.03	-1955.71	-2036.58	-2078	-2238.6	-2267.65	-2237.52	-2431.82	-2524.23	-2642.48	-2852.81	-3099.3	-3249.35	-3386.97	-3808.16	-3906.51	-3979	-4235.66	-4115.91	-4493.52	-4485.06	-4513.92	-4564.08	-4917.4	-4501.52	-4886.44
			36.3671	-20.4283	82.4715	208.816	5.56125	-79.0596	-287.248	-369.765	-389.834	-349.18	-360.708	-518.032	-528.379	-446.036	-918.655	-1047.01	-1134.44	-1334.79	-1231.49	-1272.68	-1472.85	-1756.52	-1837.4	-1878.82	-1986.51	-2417.25	-2038.34	-2232.64	-2325.05	-2443.3	-2653.62	-2900.11	-3050.17	-3187.79	-3608.97	-3707.33	-3779.82	-4036.48	-3916.73	-4294.34	-4285.88	-4314.73	-4364.89	-4718.22	-4302.34	-4687.25	-5045.57
			-56.7954	46.1044	172.449	-30.8058	-115.427	-323.615	-406.132	-426.201	-385.547	-397.075	-554.399	-564.746	-482.403	-955.022	-1083.38	-1170.81	-1371.16	-1267.85	-1309.04	-1509.21	-1792.89	-1873.76	-1915.18	-2022.88	-2104.83	-2357.14	-2269.01	-2361.42	-2479.67	-2689.99	-2936.48	-3086.54	-3224.16	-3645.34	-3743.69	-3816.18	-4072.84	-3953.1	-4330.7	-4322.24	-4351.1	-4401.26	-4754.59	-4338.71	-4723.62	-5081.94	-5041.72
			102.9	229.244	25.9896	-58.6313	-266.819	-349.337	-369.406	-328.751	-340.279	-497.604	-507.951	-425.608	-898.227	-1026.58	-1114.01	-1314.36	-1211.06	-1252.25	-1452.42	-1736.1	-1816.97	-1858.39	-1966.08	-2048.04	-2017.91	-2431.82	-2304.62	-2422.87	-2633.2	-2879.69	-3029.74	-3167.36	-3588.54	-3686.9	-3759.39	-4016.05	-3896.3	-4273.91	-4265.45	-4294.31	-4344.46	-4697.79	-4281.91	-4666.82	-5025.15	-4984.93	-5287.17
			126.344	-76.9103	-161.531	-369.719	-452.237	-472.306	-431.651	-443.179	-600.503	-610.851	-528.508	-1001.13	-1129.48	-1216.91	-1417.26	-1313.96	-1355.15	-1555.32	-1839	-1919.87	-1961.29	-2068.98	-2150.94	-2120.81	-2315.11	-2325.05	-2525.77	-2736.1	-2982.59	-3132.64	-3270.26	-3691.44	-3789.8	-3862.29	-4118.95	-3999.2	-4376.81	-4368.35	-4397.2	-4447.36	-4800.69	-4384.81	-4769.72	-5128.04	-5087.83	-5390.07	-5750.95
			-203.254	-287.875	-496.063	-578.581	-598.65	-557.995	-569.523	-726.848	-737.195	-654.852	-1127.47	-1255.83	-1343.26	-1543.6	-1440.3	-1481.49	-1681.66	-1965.34	-2046.21	-2087.63	-2195.32	-2277.28	-2247.16	-2441.46	-2533.86	-2479.67	-2862.44	-3108.93	-3258.98	-3396.6	-3817.79	-3916.14	-3988.63	-4245.29	-4125.54	-4503.15	-4494.69	-4523.55	-4573.71	-4927.04	-4511.15	-4896.07	-5254.39	-5214.17	-5516.42	-5877.29	-6420.4
			-84.6208	-292.809	-375.327	-395.396	-354.741	-366.269	-523.593	-533.94	-451.598	-924.216	-1052.57	-1140	-1340.35	-1237.05	-1278.24	-1478.41	-1762.09	-1842.96	-1884.38	-1992.07	-2074.03	-2043.9	-2238.2	-2330.61	-2448.86	-2633.2	-2905.68	-3055.73	-3193.35	-3614.53	-3712.89	-3785.38	-4042.04	-3922.29	-4299.9	-4291.44	-4320.29	-4370.45	-4723.78	-4307.9	-4692.81	-5051.13	-5010.92	-5313.16	-5674.04	-6217.15	-6497.38
			-208.188	-290.706	-310.775	-270.12	-281.648	-438.972	-449.32	-366.977	-839.596	-967.953	-1055.38	-1255.73	-1152.43	-1193.62	-1393.79	-1677.46	-1758.34	-1799.76	-1907.45	-1989.41	-1959.28	-2153.58	-2245.99	-2364.24	-2574.56	-2982.59	-2971.11	-3108.73	-3529.91	-3628.27	-3700.76	-3957.42	-3837.67	-4215.28	-4206.82	-4235.67	-4285.83	-4639.16	-4223.28	-4608.19	-4966.51	-4926.3	-5228.54	-5589.42	-6132.53	-6412.76
			-82.5177	-102.587	-61.9319	-73.46	-230.784	-241.132	-158.789	-631.408	-759.765	-847.196	-1047.54	-944.238	-985.429	-1185.6	-1469.28	-1550.15	-1591.57	-1699.26	-1781.22	-1751.09	-1945.39	-2037.8	-2156.05	-2366.38	-2612.87	-3258.98	-2900.54	-3321.73	-3420.08	-3492.57	-3749.23	-3629.48	-4007.09	-3998.63	-4027.49	-4077.64	-4430.97	-4015.09	-4400	-4758.33	-4718.11	-5020.36	-5381.23	-5924.34	-6204.57
			-20.0689	20.5859	9.05773	-148.266	-158.614	-76.271	-548.89	-677.247	-764.678	-965.023	-861.72	-902.911	-1103.08	-1386.76	-1467.63	-1509.05	-1616.74	-1698.7	-1668.57	-1862.88	-1955.28	-2073.53	-2283.86	-2530.35	-2680.4	-3193.35	-3239.21	-3337.56	-3410.05	-3666.71	-3546.96	-3924.57	-3916.11	-3944.97	-3995.13	-4348.46	-3932.57	-4317.49	-4675.81	-4635.59	-4937.84	-5298.71	-5841.82	-6122.05
			40.6547	29.1266	-128.198	-138.545	-56.2021	-528.821	-657.179	-744.609	-944.954	-841.652	-882.842	-1083.01	-1366.69	-1447.56	-1488.98	-1596.67	-1678.63	-1648.51	-1842.81	-1935.21	-2053.46	-2263.79	-2510.28	-2660.33	-2797.95	-3529.91	-3317.49	-3389.98	-3646.64	-3526.89	-3904.5	-3896.04	-3924.9	-3975.06	-4328.39	-3912.5	-4297.42	-4655.74	-4615.52	-4917.77	-5278.64	-5821.75	-6101.98
			-11.5281	-168.852	-179.2	-96.8568	-569.476	-697.833	-785.264	-985.609	-882.306	-923.497	-1123.67	-1407.34	-1488.22	-1529.64	-1637.33	-1719.29	-1689.16	-1883.46	-1975.87	-2094.12	-2304.44	-2550.94	-2700.99	-2838.61	-3259.79	-3420.08	-3430.64	-3687.3	-3567.55	-3945.16	-3936.7	-3965.55	-4015.71	-4369.04	-3953.16	-4338.07	-4696.39	-4656.18	-4958.42	-5319.3	-5862.41	-6142.64
			-157.324	-167.672	-85.3287	-557.948	-686.305	-773.736	-974.081	-870.778	-911.969	-1112.14	-1395.82	-1476.69	-1518.11	-1625.8	-1707.76	-1677.63	-1871.93	-1964.34	-2082.59	-2292.92	-2539.41	-2689.46	-2827.08	-3248.27	-3346.62	-3410.05	-3675.77	-3556.02	-3933.63	-3925.17	-3954.03	-4004.18	-4357.51	-3941.63	-4326.54	-4684.87	-4644.65	-4946.9	-5307.77	-5850.88	-6131.11
			-10.3473	71.9955	-400.623	-528.981	-616.411	-816.756	-713.454	-754.645	-954.814	-1238.49	-1319.36	-1360.79	-1468.48	-1550.44	-1520.31	-1714.61	-1807.02	-1925.27	-2135.59	-2382.08	-2532.14	-2669.76	-3090.94	-3189.29	-3261.78	-3646.64	-3398.7	-3776.31	-3767.84	-3796.7	-3846.86	-4200.19	-3784.31	-4169.22	-4527.54	-4487.32	-4789.57	-5150.45	-5693.56	-5973.78
			82.3428	-390.276	-518.634	-606.064	-806.409	-703.107	-744.298	-944.466	-1228.14	-1309.02	-1350.44	-1458.13	-1540.09	-1509.96	-1704.26	-1796.67	-1914.92	-2125.24	-2371.74	-2521.79	-2659.41	-3080.59	-3178.95	-3251.44	-3508.1	-3567.55	-3765.96	-3757.5	-3786.35	-3836.51	-4189.84	-3773.96	-4158.87	-4517.19	-4476.98	-4779.22	-5140.1	-5683.21	-5963.44
			-472.619	-600.976	-688.407	-888.752	-785.45	-826.64	-1026.81	-1310.49	-1391.36	-1432.78	-1540.47	-1622.43	-1592.3	-1786.6	-1879.01	-1997.26	-2207.59	-2454.08	-2604.13	-2741.75	-3162.94	-3261.29	-3333.78	-3590.44	-3470.69	-3933.63	-3839.84	-3868.7	-3918.85	-4272.18	-3856.3	-4241.21	-4599.54	-4559.32	-4861.57	-5222.44	-5765.55	-6045.78
			-128.358	-215.788	-416.133	-312.831	-354.021	-554.19	-837.869	-918.741	-960.162	-1067.85	-1149.81	-1119.68	-1313.99	-1406.39	-1524.64	-1734.97	-1981.46	-2131.51	-2269.13	-2690.32	-2788.67	-2861.16	-3117.82	-2998.07	-3375.68	-3767.84	-3396.08	-3446.24	-3799.57	-3383.68	-3768.6	-4126.92	-4086.7	-4388.95	-4749.82	-5292.93	-5573.16
			-87.4305	-287.776	-184.473	-225.664	-425.833	-709.511	-790.384	-831.805	-939.495	-1021.45	-991.327	-1185.63	-1278.04	-1396.29	-1606.61	-1853.1	-2003.16	-2140.78	-2561.96	-2660.31	-2732.8	-2989.46	-2869.72	-3247.32	-3238.86	-3786.35	-3317.88	-3671.21	-3255.33	-3640.24	-3998.56	-3958.34	-4260.59	-4621.46	-5164.57	-5444.8
			-200.345	-97.0426	-138.233	-338.402	-622.081	-702.953	-744.374	-852.065	-934.024	-903.896	-1098.2	-1190.61	-1308.85	-1519.18	-1765.67	-1915.72	-2053.35	-2474.53	-2572.88	-2645.37	-2902.03	-2782.29	-3159.89	-3151.43	-3180.29	-3918.85	-3583.78	-3167.89	-3552.81	-3911.13	-3870.91	-4173.16	-4534.03	-5077.14	-5357.37
			103.302	62.1116	-138.057	-421.736	-502.608	-544.029	-651.72	-733.679	-703.551	-897.852	-990.26	-1108.51	-1318.84	-1565.33	-1715.38	-1853	-2274.18	-2372.54	-2445.03	-2701.69	-2581.94	-2959.55	-2951.09	-2979.95	-3030.1	-3799.57	-2967.55	-3352.46	-3710.79	-3670.57	-3972.81	-4333.69	-4876.8	-5157.03
			-41.1908	-241.36	-525.038	-605.911	-647.332	-755.022	-836.981	-806.854	-1001.15	-1093.56	-1211.81	-1422.14	-1668.63	-1818.68	-1956.3	-2377.49	-2475.84	-2548.33	-2804.99	-2685.24	-3062.85	-3054.39	-3083.25	-3133.41	-3486.73	-3255.33	-3455.77	-3814.09	-3773.87	-4076.12	-4436.99	-4980.1	-5260.33
			-200.169	-483.847	-564.72	-606.141	-713.831	-795.791	-765.663	-959.964	-1052.37	-1170.62	-1380.95	-1627.44	-1777.49	-1915.11	-2336.3	-2434.65	-2507.14	-2763.8	-2644.05	-3021.66	-3013.2	-3042.06	-3092.21	-3445.54	-3029.66	-3552.81	-3772.9	-3732.68	-4034.93	-4395.8	-4938.91	-5219.14
			-283.678	-364.551	-405.972	-513.662	-595.622	-565.494	-759.795	-852.203	-970.453	-1180.78	-1427.27	-1577.32	-1714.94	-2136.13	-2234.48	-2306.97	-2563.63	-2443.88	-2821.49	-2813.03	-2841.89	-2892.05	-3245.37	-2829.49	-3214.41	-3710.79	-3532.51	-3834.76	-4195.63	-4738.74	-5018.97
			-80.8725	-122.293	-229.984	-311.943	-281.815	-476.116	-568.525	-686.774	-897.1	-1143.59	-1293.64	-1431.27	-1852.45	-1950.8	-2023.29	-2279.95	-2160.2	-2537.81	-2529.35	-2558.21	-2608.37	-2961.7	-2545.81	-2930.73	-3289.05	-3773.87	-3551.08	-3911.95	-4455.06	-4735.29
			-41.4209	-149.111	-231.071	-200.943	-395.244	-487.652	-605.902	-816.227	-1062.72	-1212.77	-1350.39	-1771.58	-1869.93	-1942.42	-2199.08	-2079.33	-2456.94	-2448.48	-2477.34	-2527.49	-2880.82	-2464.94	-2849.85	-3208.18	-3167.96	-4034.93	-3831.08	-4374.19	-4654.42
			-107.69	-189.65	-159.522	-353.823	-446.231	-564.481	-774.806	-1021.3	-1171.35	-1308.97	-1730.16	-1828.51	-1901	-2157.66	-2037.91	-2415.52	-2407.06	-2435.92	-2486.07	-2839.4	-2423.52	-2808.43	-3166.76	-3126.54	-3428.79	-4195.63	-4332.77	-4613
			-81.9594	-51.8316	-246.133	-338.541	-456.79	-667.116	-913.607	-1063.66	-1201.28	-1622.46	-1720.82	-1793.31	-2049.97	-1930.22	-2307.83	-2299.37	-2328.23	-2378.38	-2731.71	-2315.83	-2700.74	-3059.07	-3018.85	-3321.1	-3681.97	-4455.06	-4505.31
			30.1278	-164.173	-256.581	-374.831	-585.156	-831.648	-981.701	-1119.32	-1540.51	-1638.86	-1711.35	-1968.01	-1848.26	-2225.87	-2217.41	-2246.27	-2296.42	-2649.75	-2233.87	-2618.78	-2977.11	-2936.89	-3239.14	-3600.01	-4143.12	-4654.42
			-194.301	-286.709	-404.959	-615.284	-861.775	-1011.83	-1149.45	-1570.63	-1668.99	-1741.48	-1998.14	-1878.39	-2256	-2247.54	-2276.39	-2326.55	-2679.88	-2264	-2648.91	-3007.23	-2967.02	-3269.26	-3630.14	-4173.25	-4453.48
			-92.4083	-210.658	-420.983	-667.474	-817.528	-955.149	-1376.33	-1474.69	-1547.17	-1803.84	-1684.09	-2061.7	-2053.23	-2082.09	-2132.25	-2485.58	-2069.7	-2454.61	-2812.93	-2772.72	-3074.96	-3435.84	-3978.95	-4259.18
			-118.249	-328.575	-575.066	-725.119	-862.74	-1283.92	-1382.28	-1454.77	-1711.43	-1591.68	-1969.29	-1960.83	-1989.68	-2039.84	-2393.17	-1977.29	-2362.2	-2720.52	-2680.31	-2982.55	-3343.43	-3886.54	-4166.77
			-210.325	-456.817	-606.87	-744.491	-1165.67	-1264.03	-1336.52	-1593.18	-1473.43	-1851.04	-1842.58	-1871.44	-1921.59	-2274.92	-1859.04	-2243.95	-2602.28	-2562.06	-2864.31	-3225.18	-3768.29	-4048.52
			-246.491	-396.545	-534.166	-955.349	-1053.7	-1126.19	-1382.85	-1263.1	-1640.71	-1632.25	-1661.11	-1711.27	-2064.6	-1648.71	-2033.63	-2391.95	-2351.73	-2653.98	-3014.85	-3557.96	-3838.19
			-150.053	-287.674	-708.858	-807.211	-879.7	-1136.36	-1016.61	-1394.22	-1385.76	-1414.62	-1464.78	-1818.11	-1402.22	-1787.14	-2145.46	-2105.24	-2407.49	-2768.36	-3311.47	-3591.7
			-137.621	-558.805	-657.158	-729.647	-986.309	-866.56	-1244.17	-1235.71	-1264.57	-1314.72	-1668.05	-1252.17	-1637.08	-1995.41	-1955.19	-2257.44	-2618.31	-3161.42	-3441.65
			-421.184	-519.537	-592.026	-848.688	-728.939	-1106.55	-1098.09	-1126.94	-1177.1	-1530.43	-1114.55	-1499.46	-1857.78	-1817.57	-2119.81	-2480.69	-3023.8	-3304.03
			-98.3531	-170.842	-427.504	-307.756	-685.365	-676.903	-705.761	-755.918	-1109.25	-693.365	-1078.28	-1436.6	-1396.38	-1698.63	-2059.5	-2602.61	-2882.84
			-72.4892	-329.151	-209.402	-587.012	-578.549	-607.408	-657.565	-1010.89	-595.012	-979.925	-1338.25	-1298.03	-1600.28	-1961.15	-2504.26	-2784.49
			-256.662	-136.913	-514.522	-506.06	-534.918	-585.076	-938.405	-522.523	-907.436	-1265.76	-1225.54	-1527.79	-1888.66	-2431.77	-2712
			119.749	-257.861	-249.398	-278.256	-328.414	-681.744	-265.861	-650.774	-1009.1	-968.88	-1271.13	-1632	-2175.11	-2455.34
			-377.609	-369.147	-398.005	-448.163	-801.492	-385.61	-770.523	-1128.85	-1088.63	-1390.87	-1751.75	-2294.86	-2575.09
			8.46222	-20.3958	-70.5533	-423.883	-8.00068	-392.914	-751.236	-711.019	-1013.27	-1374.14	-1917.25	-2197.48
			-28.858	-79.0156	-432.345	-16.4629	-401.376	-759.698	-719.481	-1021.73	-1382.6	-1925.71	-2205.94
			-50.1575	-403.487	12.3951	-372.518	-730.84	-690.623	-992.87	-1353.74	-1896.85	-2177.08
			-353.33	62.5526	-322.36	-680.683	-640.466	-942.712	-1303.59	-1846.7	-2126.93
			415.882	30.9692	-327.353	-287.136	-589.383	-950.257	-1493.37	-1773.6
			-384.913	-743.235	-703.018	-1005.26	-1366.14	-1909.25	-2189.48
			-358.322	-318.105	-620.352	-981.226	-1524.34	-1804.56
			40.217	-262.03	-622.904	-1166.01	-1446.24
			-302.247	-663.121	-1206.23	-1486.46
			-360.874	-903.985	-1184.21
			-543.11	-823.339
			-280.228
MT#5 (5)			113.931	381.548	652.038	709.952	642.674	924.574	939.383	1299.59	971.068	703.572	619.591	662.959	582.332	236.601	149.575	-94.6792	-275.199	-783.247
			267.617	538.107	596.021	528.743	810.643	825.452	1185.66	857.137	589.641	505.66	549.029	468.401	122.67	35.6442	-208.61	-389.13	-897.178
			270.49	328.404	261.126	543.026	557.836	918.04	589.52	322.024	238.044	281.412	200.784	-144.946	-231.972	-476.227	-656.747	-1164.79
			57.9138	-9.36397	272.536	287.345	647.55	319.03	51.5341	-32.4464	10.9217	-69.7059	-415.436	-502.463	-746.717	-927.237	-1435.28
			-67.2778	214.622	229.432	589.636	261.116	-6.37973	-90.3602	-46.9921	-127.62	-473.35	-560.376	-804.631	-985.151	-1493.2
			281.9	296.709	656.914	328.394	60.898	-23.0824	20.2856	-60.3419	-406.073	-493.099	-737.353	-917.873	-1425.92
			14.8093	375.014	46.494	-221.002	-304.983	-261.614	-342.242	-687.973	-774.999	-1019.25	-1199.77	-1707.82
			360.205	31.6847	-235.811	-319.792	-276.424	-357.051	-702.782	-789.808	-1034.06	-1214.58	-1722.63
			-328.52	-596.016	-679.996	-636.628	-717.256	-1062.99	-1150.01	-1394.27	-1574.79	-2082.83
			-267.496	-351.477	-308.109	-388.736	-734.467	-821.493	-1065.75	-1246.27	-1754.31
			-83.9804	-40.6124	-121.24	-466.971	-553.997	-798.251	-978.771	-1486.82
			43.3681	-37.2595	-382.99	-470.016	-714.271	-894.791	-1402.84
			-80.6276	-426.358	-513.384	-757.639	-938.159	-1446.21
			-345.731	-432.757	-677.011	-857.531	-1365.58
			-87.0261	-331.28	-511.801	-1019.85
			-244.254	-424.774	-932.822
			-180.52	-688.568
			-508.048
MT#5 (6)			-664.331	-1144.76	-1550.4	-2095.88	-2556.27	-2899.15	-3633.97	-4044.17	-3810.07	-3842.65	-3753.73	-3765.82	-3614.19	-3755.1	-3742.63
			-480.431	-886.072	-1431.54	-1891.93	-2234.82	-2969.64	-3379.84	-3145.74	-3178.32	-3089.39	-3101.49	-2949.85	-3090.77	-3078.29
			-405.641	-951.113	-1411.5	-1754.39	-2489.21	-2899.41	-2665.3	-2697.89	-2608.96	-2621.06	-2469.42	-2610.34	-2597.86
			-545.472	-1005.86	-1348.75	-2083.57	-2493.77	-2259.66	-2292.25	-2203.32	-2215.42	-2063.78	-2204.7	-2192.22
			-460.39	-803.275	-1538.1	-1948.3	-1714.19	-1746.77	-1657.85	-1669.95	-1518.31	-1659.22	-1646.75
			-342.884	-1077.71	-1487.91	-1253.8	-1286.38	-1197.46	-1209.56	-1057.92	-1198.83	-1186.36
			-734.823	-1145.02	-910.917	-943.499	-854.575	-866.673	-715.035	-855.95	-843.475
			-410.202	-176.093	-208.676	-119.752	-131.85	19.788	-121.127	-108.652
			234.108	201.526	290.45	278.352	429.99	289.075	301.55
			-32.5824	56.3412	44.2435	195.881	54.9663	67.4415
			88.9236	76.8259	228.464	87.5486	100.024
			-12.0977	139.54	-1.37496	11.1002
			151.638	10.7228	23.198
			-140.915	-128.44
			12.4752
MT#5 (7)			-539.59	-1340.28	-2196.41	-2899.78	-3106.31	-3322.51	-3733.41	-4129.83	-4595.31	-5040.06	-5505.89	-5907.36	-6393.02	-6741.96
			-800.687	-1656.82	-2360.19	-2566.72	-2782.92	-3193.82	-3590.24	-4055.72	-4500.47	-4966.3	-5367.77	-5853.43	-6202.37
			-856.129	-1559.5	-1766.04	-1982.23	-2393.13	-2789.56	-3255.04	-3699.79	-4165.62	-4567.08	-5052.75	-5401.68
			-703.373	-909.906	-1126.1	-1537	-1933.43	-2398.91	-2843.66	-3309.49	-3710.95	-4196.62	-4545.56
			-206.533	-422.729	-833.629	-1230.05	-1695.53	-2140.28	-2606.12	-3007.58	-3493.24	-3842.18
			-216.196	-627.096	-1023.52	-1489	-1933.75	-2399.58	-2801.05	-3286.71	-3635.65
			-410.9	-807.326	-1272.8	-1717.56	-2183.39	-2584.85	-3070.52	-3419.45
			-396.426	-861.904	-1306.66	-1772.49	-2173.95	-2659.62	-3008.55
			-465.478	-910.23	-1376.06	-1777.53	-2263.19	-2612.13
			-444.751	-910.582	-1312.05	-1797.71	-2146.65
			-465.831	-867.296	-1352.96	-1701.9
			-401.465	-887.129	-1236.07
			-485.664	-834.602
			-348.938
MT#5 (9)			-407.112	-956.293	-1079.5	-1394.11	-1793.3	-2027.1	-2203.43	-2396.23	-2741.95	-2889.81	-3058.7	-3246.84	-3430.59	-3334.65	-3862.79	-4121.15	-4279.87	-4473.93	-4597.08	-4855.43
			-549.181	-672.388	-986.999	-1386.19	-1619.99	-1796.32	-1989.12	-2334.84	-2482.7	-2651.59	-2839.72	-3023.48	-2927.54	-3455.67	-3714.03	-3872.76	-4066.82	-4189.97	-4448.32
			-123.207	-437.818	-837.006	-1070.81	-1247.14	-1439.94	-1785.66	-1933.52	-2102.41	-2290.54	-2474.3	-2378.36	-2906.49	-3164.85	-3323.58	-3517.64	-3640.79	-3899.14
			-314.611	-713.799	-947.603	-1123.93	-1316.73	-1662.45	-1810.31	-1979.2	-2167.34	-2351.09	-2255.15	-2783.29	-3041.65	-3200.37	-3394.43	-3517.58	-3775.93
			-399.188	-632.992	-809.322	-1002.12	-1347.84	-1495.7	-1664.59	-1852.73	-2036.48	-1940.54	-2468.67	-2727.03	-2885.76	-3079.82	-3202.97	-3461.32
			-233.804	-410.134	-602.933	-948.653	-1096.52	-1265.4	-1453.54	-1637.29	-1541.35	-2069.49	-2327.85	-2486.57	-2680.64	-2803.78	-3062.13
			-176.33	-369.128	-714.849	-862.712	-1031.6	-1219.73	-1403.49	-1307.55	-1835.68	-2094.04	-2252.77	-2446.83	-2569.98	-2828.33
			-192.798	-538.518	-686.382	-855.268	-1043.4	-1227.16	-1131.22	-1659.35	-1917.71	-2076.44	-2270.5	-2393.65	-2652
			-345.72	-493.584	-662.469	-850.605	-1034.36	-938.419	-1466.55	-1724.91	-1883.64	-2077.7	-2200.85	-2459.2
			-147.863	-316.749	-504.885	-688.637	-592.699	-1120.83	-1379.19	-1537.92	-1731.98	-1855.13	-2113.48
			-168.886	-357.021	-540.774	-444.836	-972.971	-1231.33	-1390.06	-1584.12	-1707.27	-1965.62
			-188.135	-371.888	-275.95	-804.085	-1062.44	-1221.17	-1415.23	-1538.38	-1796.73
			-183.752	-87.8146	-615.949	-874.309	-1033.04	-1227.1	-1350.24	-1608.59
			95.9377	-432.197	-690.557	-849.285	-1043.35	-1166.49	-1424.84
			-528.135	-786.494	-945.223	-1139.28	-1262.43	-1520.78
			-258.36	-417.088	-611.149	-734.295	-992.645
			-158.728	-352.789	-475.935	-734.285
			-194.061	-317.207	-575.557
			-123.146	-381.496
			-258.35
MT#5 (10)			-939.928	-1685.5	-2294.57	-2883.07
			-745.572	-1354.65	-1943.15
			-609.074	-1197.57
			-588.499
MT#5 (11)			-330.661	-733.571	-1228.79
			-402.91	-898.131
			-495.222
MT#5 (12)			-693.317	-1258.18	-1822.93	-2275.19	-2495.63	-2931.88	-3830.05	-4327.79	-4806.33	-5535.97	-6105.14	-6763.39	-7034.48	-7180.74	-7244.46	-7285.54	-7358.3	-7454.58	-7591.07	-7767.27	-7989.97	-8114.35	-8247.74	-8418.56
			-564.86	-1129.61	-1581.87	-1802.32	-2238.56	-3136.73	-3634.48	-4113.01	-4842.66	-5411.82	-6070.07	-6341.17	-6487.42	-6551.14	-6592.23	-6664.99	-6761.26	-6897.76	-7073.96	-7296.65	-7421.04	-7554.42	-7725.24
			-564.748	-1017.01	-1237.46	-1673.7	-2571.87	-3069.62	-3548.15	-4277.8	-4846.96	-5505.21	-5776.31	-5922.56	-5986.28	-6027.37	-6100.13	-6196.4	-6332.9	-6509.1	-6731.79	-6856.18	-6989.56	-7160.38
			-452.261	-672.71	-1108.95	-2007.12	-2504.87	-2983.4	-3713.05	-4282.21	-4940.46	-5211.56	-5357.81	-5421.53	-5462.62	-5535.38	-5631.65	-5768.15	-5944.35	-6167.04	-6291.43	-6424.81	-6595.63
			-220.449	-656.693	-1554.86	-2052.61	-2531.14	-3260.79	-3829.95	-4488.2	-4759.3	-4905.55	-4969.27	-5010.36	-5083.12	-5179.39	-5315.89	-5492.09	-5714.78	-5839.17	-5972.55	-6143.37
			-436.244	-1334.41	-1832.16	-2310.69	-3040.34	-3609.5	-4267.75	-4538.85	-4685.1	-4748.82	-4789.91	-4862.67	-4958.94	-5095.44	-5271.64	-5494.33	-5618.72	-5752.11	-5922.92
			-898.169	-1395.91	-1874.45	-2604.1	-3173.26	-3831.51	-4102.6	-4248.86	-4312.58	-4353.66	-4426.42	-4522.7	-4659.19	-4835.39	-5058.09	-5182.47	-5315.86	-5486.68
			-497.745	-976.276	-1705.93	-2275.09	-2933.34	-3204.44	-3350.69	-3414.41	-3455.5	-3528.25	-3624.53	-3761.02	-3937.22	-4159.92	-4284.31	-4417.69	-4588.51
			-478.531	-1208.18	-1777.35	-2435.6	-2706.69	-2852.94	-2916.66	-2957.75	-3030.51	-3126.78	-3263.28	-3439.48	-3662.18	-3786.56	-3919.95	-4090.76
			-729.65	-1298.81	-1957.06	-2228.16	-2374.41	-2438.13	-2479.22	-2551.98	-2648.25	-2784.75	-2960.95	-3183.64	-3308.03	-3441.42	-3612.23
			-569.165	-1227.41	-1498.51	-1644.76	-1708.48	-1749.57	-1822.33	-1918.6	-2055.1	-2231.3	-2453.99	-2578.38	-2711.77	-2882.58
			-658.25	-929.344	-1075.6	-1139.32	-1180.4	-1253.16	-1349.44	-1485.93	-1662.13	-1884.83	-2009.21	-2142.6	-2313.42
			-271.094	-417.348	-481.067	-522.154	-594.914	-691.186	-827.684	-1003.88	-1226.58	-1350.96	-1484.35	-1655.17
			-146.254	-209.973	-251.06	-323.82	-420.091	-556.59	-732.789	-955.486	-1079.87	-1213.26	-1384.07
			-63.7189	-104.806	-177.566	-273.838	-410.336	-586.535	-809.232	-933.616	-1067	-1237.82
			-41.0874	-113.847	-210.119	-346.617	-522.816	-745.513	-869.897	-1003.28	-1174.1
			-72.7597	-169.031	-305.53	-481.729	-704.426	-828.81	-962.196	-1133.01
			-96.2716	-232.77	-408.969	-631.666	-756.05	-889.437	-1060.25
			-136.498	-312.697	-535.394	-659.779	-793.165	-963.983
			-176.199	-398.896	-523.28	-656.666	-827.485
			-222.697	-347.081	-480.467	-651.286
			-124.384	-257.771	-428.589
			-133.386	-304.205
			-170.818
MT#5 (13)			-743.248	-1454.24	-2092.11	-2684.4	-3083.34	-3236.25	-3573.2	-3930.51	-4303.16	-4721.97	-5241.95	-5693.95	-6238.85	-6708.54
			-710.994	-1348.86	-1941.16	-2340.09	-2493	-2829.95	-3187.26	-3559.91	-3978.72	-4498.7	-4950.7	-5495.61	-5965.29
			-637.866	-1230.16	-1629.09	-1782.01	-2118.96	-2476.27	-2848.92	-3267.72	-3787.7	-4239.71	-4784.61	-5254.3
			-592.296	-991.228	-1144.14	-1481.09	-1838.4	-2211.05	-2629.86	-3149.84	-3601.84	-4146.75	-4616.43
			-398.932	-551.849	-888.794	-1246.11	-1618.76	-2037.56	-2557.54	-3009.54	-3554.45	-4024.14
			-152.916	-489.862	-847.175	-1219.82	-1638.63	-2158.61	-2610.61	-3155.52	-3625.2
			-336.946	-694.259	-1066.91	-1485.71	-2005.69	-2457.7	-3002.6	-3472.29
			-357.313	-729.961	-1148.77	-1668.75	-2120.75	-2665.66	-3135.34
			-372.648	-791.455	-1311.43	-1763.44	-2308.34	-2778.03
			-418.808	-938.787	-1390.79	-1935.7	-2405.38
			-519.979	-971.982	-1516.89	-1986.57
			-452.003	-996.908	-1466.59
			-544.906	-1014.59
			-469.686
MT#5 (14)			-853.144	-1434.63	-2139.41	-2718.02	-3099.87	-3279.37	-3699.21	-4005.35	-4375.68	-4770.96	-5385.66	-5715.35	-6323.22	-6746.05
			-581.481	-1286.27	-1864.88	-2246.73	-2426.23	-2846.07	-3152.2	-3522.53	-3917.81	-4532.51	-4862.21	-5470.08	-5892.91
			-704.789	-1283.4	-1665.25	-1844.75	-2264.58	-2570.72	-2941.05	-3336.33	-3951.03	-4280.73	-4888.6	-5311.43
			-578.61	-960.456	-1139.96	-1559.8	-1865.93	-2236.26	-2631.54	-3246.24	-3575.94	-4183.81	-4606.64
			-381.846	-561.348	-981.185	-1287.32	-1657.65	-2052.93	-2667.63	-2997.33	-3605.2	-4028.03
			-179.502	-599.339	-905.476	-1275.81	-1671.09	-2285.79	-2615.48	-3223.35	-3646.18
			-419.837	-725.974	-1096.3	-1491.59	-2106.29	-2435.98	-3043.85	-3466.68
			-306.137	-676.467	-1071.75	-1686.45	-2016.14	-2624.02	-3046.84
			-370.331	-765.613	-1380.31	-1710.01	-2317.88	-2740.7
			-395.282	-1009.98	-1339.68	-1947.55	-2370.37
			-614.699	-944.394	-1552.27	-1975.09
			-329.695	-937.567	-1360.39
			-607.872	-1030.7
			-422.826
MT#8 (1)			-594.225	-1175.18	-1841.99	-2413.58	-3229.7	-4224.99	-4640.33	-5209.11	-5961.18	-6343.35	-6775.28	-7198.7
			-580.954	-1247.76	-1819.36	-2635.47	-3630.77	-4046.11	-4614.88	-5366.95	-5749.13	-6181.05	-6604.48
			-666.809	-1238.4	-2054.52	-3049.81	-3465.15	-4033.93	-4786	-5168.17	-5600.1	-6023.52
			-571.593	-1387.71	-2383.01	-2798.34	-3367.12	-4119.19	-4501.37	-4933.29	-5356.71
			-816.115	-1811.41	-2226.75	-2795.53	-3547.59	-3929.77	-4361.7	-4785.12
			-995.297	-1410.64	-1979.41	-2731.48	-3113.66	-3545.58	-3969.01
			-415.338	-984.115	-1736.18	-2118.36	-2550.28	-2973.71
			-568.777	-1320.84	-1703.02	-2134.95	-2558.37
			-752.067	-1134.24	-1566.17	-1989.59
			-382.178	-814.102	-1237.53
			-431.924	-855.349
			-423.425
MT#8 (2)			-393.832	-752.129	-1344.42	-1778.03	-2201.39	-2826.07	-3303.08	-3895.07	-4349.8
			-358.297	-950.584	-1384.2	-1807.56	-2432.23	-2909.25	-3501.24	-3955.97
			-592.287	-1025.9	-1449.26	-2073.94	-2550.95	-3142.94	-3597.67
			-433.616	-856.976	-1481.65	-1958.67	-2550.65	-3005.39
			-423.36	-1048.03	-1525.05	-2117.04	-2571.77
			-624.675	-1101.69	-1693.68	-2148.41
			-477.017	-1069	-1523.73
			-591.984	-1046.72
			-454.734
MT#8 (3)			-555.267	-1228.72	-1705.01	-2435.21	-2847.32	-3344.36	-3969.1	-4508.61	-4815.34
			-673.457	-1149.75	-1879.95	-2292.06	-2789.09	-3413.84	-3953.35	-4260.08
			-476.291	-1206.49	-1618.6	-2115.63	-2740.38	-3279.89	-3586.62
			-730.197	-1142.31	-1639.34	-2264.09	-2803.6	-3110.33
			-412.113	-909.147	-1533.89	-2073.4	-2380.13
			-497.034	-1121.78	-1661.29	-1968.02
			-624.745	-1164.25	-1470.99
			-539.508	-846.24
			-306.732
MT#11 (1)			-427.447	-917.597	-1187.66	-1768.48	-2543.27	-3098.88	-3835.38	-4496.02	-4940.8	-5556.61	-5684.8
			-490.15	-760.211	-1341.03	-2115.82	-2671.43	-3407.93	-4068.57	-4513.35	-5129.17	-5257.35
			-270.061	-850.881	-1625.68	-2181.28	-2917.78	-3578.42	-4023.2	-4639.02	-4767.2
			-580.82	-1355.61	-1911.22	-2647.72	-3308.36	-3753.14	-4368.95	-4497.14
			-774.794	-1330.4	-2066.9	-2727.54	-3172.32	-3788.13	-3916.32
			-555.608	-1292.11	-1952.75	-2397.53	-3013.34	-3141.53
			-736.502	-1397.14	-1841.92	-2457.73	-2585.92
			-660.636	-1105.42	-1721.23	-1849.42
			-444.781	-1060.6	-1188.78
			-615.814	-744.003
			-128.189
MT#11 (2)			-359.21	-907.1	-1457.82	-1584.48	-1752.37	-1882.78
			-547.89	-1098.61	-1225.27	-1393.16	-1523.57
			-550.723	-677.381	-845.272	-975.677
			-126.658	-294.55	-424.955
			-167.892	-298.297
			-130.405
MT#11 (3)			-193.779	-612.783	-1048.23	-1497.06	-2047.38	-2531.7	-2668.7
			-419.004	-854.452	-1303.28	-1853.6	-2337.92	-2474.92
			-435.448	-884.272	-1434.6	-1918.92	-2055.92
			-448.824	-999.152	-1483.47	-1620.47
			-550.327	-1034.65	-1171.64
			-484.319	-621.318
			-136.999
MT#11 (4)			-569.505	-1312.51	-2087.05	-2519.67	-3024.19	-3688.42	-3934.49
			-743.006	-1517.54	-1950.16	-2454.69	-3118.91	-3364.99
			-774.535	-1207.16	-1711.68	-2375.91	-2621.98
			-432.622	-937.146	-1601.37	-1847.45
			-504.524	-1168.75	-1414.83
			-664.227	-910.301
			-246.074
MT#13 (1)			-381.548	-704.849	-1077.63	-1377.27	-1859.81	-2620.34	-3317.47	-3588.39	-4393.34
			-323.302	-696.083	-995.72	-1478.26	-2238.79	-2935.92	-3206.85	-4011.79
			-372.781	-672.418	-1154.96	-1915.49	-2612.62	-2883.54	-3688.49
			-299.637	-782.175	-1542.71	-2239.84	-2510.76	-3315.71
			-482.539	-1243.07	-1940.2	-2211.13	-3016.07
			-760.533	-1457.66	-1728.59	-2533.53
			-697.128	-968.054	-1773
			-270.926	-1075.87
			-804.943
MT#13 (2)			-1527.91	-2260.11	-3120.23	-3558.67	-4206.27	-4374.13
			-732.203	-1592.32	-2030.77	-2678.36	-2846.22
			-860.116	-1298.56	-1946.16	-2114.02
			-438.447	-1086.04	-1253.9
			-647.598	-815.458
			-167.859
MT#13 (3)			-393.698	-1097.64	-1587.67	-2268.42	-2919.07	-3279.37
			-703.944	-1193.97	-1874.73	-2525.37	-2885.67
			-490.03	-1170.78	-1821.43	-2181.73
			-680.752	-1331.4	-1691.7
			-650.647	-1010.95
			-360.301
MT#13 (4)			-165.371	-361.736	-512.424	-800.196	-1213.17	-1712.89	-2171.55	-2580.72	-3375.07	-4078.14	-4741.08	-5054.72	-5507.89
			-196.365	-347.053	-634.825	-1047.79	-1547.52	-2006.18	-2415.35	-3209.7	-3912.77	-4575.71	-4889.35	-5342.52
			-150.688	-438.461	-851.43	-1351.16	-1809.81	-2218.98	-3013.34	-3716.41	-4379.35	-4692.98	-5146.15
			-287.772	-700.742	-1200.47	-1659.12	-2068.29	-2862.65	-3565.72	-4228.66	-4542.29	-4995.46
			-412.969	-912.696	-1371.35	-1780.52	-2574.87	-3277.95	-3940.89	-4254.52	-4707.69
			-499.727	-958.382	-1367.55	-2161.91	-2864.98	-3527.92	-3841.55	-4294.72
			-458.655	-867.825	-1662.18	-2365.25	-3028.19	-3341.82	-3795
			-409.17	-1203.52	-1906.6	-2569.53	-2883.17	-3336.34
			-794.354	-1497.43	-2160.36	-2474	-2927.17
			-703.072	-1366.01	-1679.65	-2132.82
			-662.939	-976.574	-1429.74
			-313.635	-766.806
			-453.171
MT#13 (5)			-287.839	-546.248	-675.014	-959.795	-1317.04	-1497.84	-1858.03	-2234.13
			-258.409	-387.176	-671.956	-1029.21	-1210.01	-1570.19	-1946.29
			-128.767	-413.547	-770.797	-951.596	-1311.78	-1687.88
			-284.781	-642.03	-822.83	-1183.02	-1559.11
			-357.25	-538.049	-898.236	-1274.33
			-180.8	-540.987	-917.082
			-360.187	-736.282
			-376.095
MT#13 (6)			-428.603	-914.13	-1228.79	-1583.56	-2138.81	-2664.41
			-485.528	-800.19	-1154.96	-1710.21	-2235.8
			-314.662	-669.428	-1224.68	-1750.28
			-354.766	-910.017	-1435.62
			-555.251	-1080.85
			-525.598
MT#14 (1)			-70.9952	-158.75	-123.9	-158.75	-143.896	-222.25	-99.9013	-137.541	-237.846	-132.646	-67.773	-205.441	-267.9	-118.374	-265.451	-411.623	-388.117	-411.623	-399.006	-354.976	-472.431	-532.687	-550.049	-746.278	-871.486
			-87.7548	-52.9049	-87.7548	-72.9008	-151.255	-28.9061	-66.5458	-166.851	-61.6508	3.22212	-134.446	-196.905	-47.3793	-194.455	-340.628	-317.122	-340.628	-328.011	-283.981	-401.436	-461.692	-479.054	-675.283	-800.491
			34.8499	0	14.854	-63.5	58.8487	21.209	-79.0959	26.104	90.977	-46.691	-109.15	40.3755	-106.701	-252.873	-229.367	-252.873	-240.256	-196.226	-313.681	-373.937	-391.299	-587.528	-712.736
			-34.8499	-19.9959	-98.3499	23.9988	-13.6409	-113.946	-8.74588	56.127	-81.5409	-144	5.52558	-141.551	-287.723	-264.217	-287.723	-275.106	-231.076	-348.531	-408.787	-426.149	-622.378	-747.586
			14.854	-63.5	58.8487	21.209	-79.0959	26.104	90.977	-46.691	-109.15	40.3755	-106.701	-252.873	-229.367	-252.873	-240.256	-196.226	-313.681	-373.937	-391.299	-587.528	-712.736
			-78.354	43.9947	6.35499	-93.9499	11.25	76.123	-61.545	-124.004	25.5215	-121.555	-267.727	-244.221	-267.727	-255.11	-211.08	-328.535	-388.791	-406.153	-602.382	-727.59
			122.349	84.709	-15.5959	89.604	154.477	16.809	-45.6501	103.876	-43.2006	-189.373	-165.867	-189.373	-176.756	-132.726	-250.181	-310.437	-327.799	-524.028	-649.236
			-37.6397	-137.945	-32.7446	32.1283	-105.54	-167.999	-18.4732	-165.549	-311.722	-288.216	-311.722	-299.105	-255.074	-372.53	-432.786	-450.148	-646.377	-771.585
			-100.305	4.89505	69.768	-67.9	-130.359	19.1665	-127.91	-274.082	-250.576	-274.082	-261.465	-217.435	-334.89	-395.146	-412.508	-608.737	-733.945
			105.2	170.073	32.4049	-30.0542	119.471	-27.6047	-173.777	-150.271	-173.777	-161.16	-117.13	-234.585	-294.841	-312.203	-508.432	-633.641
			64.8729	-72.7951	-135.254	14.2715	-132.805	-278.977	-255.471	-278.977	-266.36	-222.33	-339.785	-400.041	-417.403	-613.632	-738.84
			-137.668	-200.127	-50.6015	-197.678	-343.85	-320.344	-343.85	-331.233	-287.203	-404.658	-464.914	-482.276	-678.505	-803.713
			-62.4591	87.0665	-60.0096	-206.182	-182.676	-206.182	-193.565	-149.535	-266.99	-327.246	-344.608	-540.837	-666.045
			149.526	2.44951	-143.723	-120.217	-143.723	-131.106	-87.0757	-204.531	-264.787	-282.149	-478.378	-603.586
			-147.076	-293.248	-269.743	-293.248	-280.631	-236.601	-354.057	-414.313	-431.675	-627.903	-753.112
			-146.172	-122.667	-146.172	-133.555	-89.5252	-206.981	-267.237	-284.599	-480.827	-606.036
			23.5056	0	12.6168	56.647	-60.8084	-121.064	-138.426	-334.655	-459.864
			-23.5056	-10.8887	33.1415	-84.314	-144.57	-161.932	-358.161	-483.369
			12.6168	56.647	-60.8084	-121.064	-138.426	-334.655	-459.864
			44.0302	-73.4253	-133.681	-151.043	-347.272	-472.48
			-117.455	-177.711	-195.073	-391.302	-516.511
			-60.256	-77.6179	-273.847	-399.055
			-17.3619	-213.591	-338.799
			-196.229	-321.437
			-125.208
MT#14 (2)			-417.457	-787.715	-842.937	-1004.02	-1227.36	-1281.47	-1575.47	-1990.17	-2389.06
			-370.258	-425.48	-586.566	-809.903	-864.015	-1158.02	-1572.72	-1971.6
			-55.2222	-216.308	-439.645	-493.757	-787.76	-1202.46	-1601.34
			-161.086	-384.423	-438.535	-732.537	-1147.24	-1546.12
			-223.337	-277.449	-571.452	-986.151	-1385.03
			-54.1119	-348.115	-762.815	-1161.7
			-294.003	-708.703	-1107.59
			-414.7	-813.583
			-398.883
MT#14 (3)			-610.493	-1245.01	-1977.1	-2577.15	-2729.81
			-634.519	-1366.6	-1966.66	-2119.32
			-732.085	-1332.14	-1484.8
			-600.055	-752.712
			-152.657
MT#14 (4)			-669.418	-1405.49	-2062.73	-2743.55	-3381.77	-3922.13
			-736.071	-1393.31	-2074.13	-2712.35	-3252.71
			-657.236	-1338.06	-1976.28	-2516.64
			-680.82	-1319.05	-1859.41
			-638.228	-1178.59
			-540.359
MT#14 (5)			-549.073	-1122.09	-1957	-2205.57	-2701.66	-3357.99	-3909.86
			-573.019	-1407.93	-1656.5	-2152.58	-2808.92	-3360.78
			-834.907	-1083.48	-1579.56	-2235.9	-2787.77
			-248.57	-744.658	-1400.99	-1952.86
			-496.087	-1152.42	-1704.29
			-656.337	-1208.2
			-551.864
MT#14 (6)			-681.713	-1401.73	-2003.36	-2790.43	-3243.17	-3570.42	-3951.03
			-720.016	-1321.65	-2108.72	-2561.45	-2888.71	-3269.32
			-601.634	-1388.7	-1841.44	-2168.69	-2549.31
			-787.065	-1239.8	-1567.06	-1947.67
			-452.738	-779.994	-1160.61
			-327.256	-707.868
			-380.612
MT#14 (7)			-389.204	-1263.01	-1689.39	-2172.03	-2527.41	-3026.97	-3395.71	-3786.49	-3950.93
			-873.807	-1300.18	-1782.83	-2138.2	-2637.76	-3006.51	-3397.29	-3561.72
			-426.375	-909.023	-1264.4	-1763.96	-2132.7	-2523.48	-2687.92
			-482.648	-838.021	-1337.58	-1706.32	-2097.11	-2261.54
			-355.373	-854.932	-1223.68	-1614.46	-1778.89
			-499.559	-868.303	-1259.08	-1423.52
			-368.743	-759.525	-923.961
			-390.782	-555.218
			-164.436
	N	0	1442	1350	1258	1166	1077	990	906	829	759	694	636	582	534	487	444	409	378	349	324	301	278	258	239	221	204	190	178	166	154	144	134	127	120	114	108	103	98	93	88	84	80	76	73	70	67	64	61
	Average	0	-346.725	-689.516	-1022.37	-1342.21	-1643.12	-1926.34	-2193.48	-2445.12	-2676.02	-2889.4	-3089.75	-3276.78	-3447.48	-3590.14	-3699.81	-3819.45	-3915.21	-3979.59	-4072.32	-4148.47	-4185.09	-4182.55	-4163.31	-4125.05	-4067.32	-4387.6	-4036.27	-3941.44	-3792.72	-3661.76	-3471.34	-3401.16	-3305.1	-3273.1	-3222.46	-3191.95	-3145.81	-3074.22	-2976.06	-3096.35	-3227.39	-3369.81	-3463.11	-3561.74	-3660.48	-3765.36	-3868.34
	SD	0	288.152	522.6	752.29	980.763	1205.51	1433.85	1663.77	1891.71	2122.81	2355.3	2580.43	2805.46	3028.53	3250.64	3462.6	3668.29	3864.59	4042.76	4242.82	4440.9	4622.34	4752.79	4860.73	4945.8	4996.91	5442.52	5129.87	5106.28	5015.47	4866.36	4606.78	4522.99	4381.36	4280.88	4119.34	3881.45	3550.5	3055.93	2297.54	2327.48	2349.14	2357.53	2403.03	2445.15	2488.27	2528.94	2570.75
	SEM	0	7.58821	14.2234	21.2102	28.722	36.7337	45.5707	55.2751	65.7017	77.053	89.4061	102.321	116.29	131.057	147.301	164.328	181.385	198.773	216.404	235.712	255.969	277.23	295.896	314.415	332.69	349.854	394.842	384.5	396.324	404.158	405.53	397.965	401.35	399.962	400.941	396.384	382.451	358.655	316.885	244.918	253.949	262.642	270.427	281.253	292.251	303.99	316.117	329.151
	Time	0	1	2	3	4	5	6	7	8	9	10	11	12	13	14	15	16	17	18	19	20	21	22	23	24	25	26	27	28	29	30	31	32	33	34	35	36	37	38	39	40	41	42	43	44	45	46	47
[truncated: 52 more columns]

## Sheet: Cin8-G522N
	Molecules	35											MD
MT#1 (2)			-461.469	-1047.87	-1733.94	-2400.49	-2955.48	-3175.63	-3127.42
			-586.402	-1272.47	-1939.02	-2494.01	-2714.17	-2665.95
			-686.069	-1352.62	-1907.61	-2127.76	-2079.55
			-666.547	-1221.54	-1441.7	-1393.48
			-554.993	-775.148	-726.928
			-220.155	-171.935
			48.2196
MT#1 (3)			79.375	-50.2012	-100.402	50.2012	-208.803	-238.654	-211.799	-80.9469	-165.74	-224.506	-193.128	-302.042	-211.799	-305.362	-289.692	-396.875
			-129.576	-179.777	-29.1738	-288.178	-318.029	-291.174	-160.322	-245.115	-303.881	-272.503	-381.417	-291.174	-384.737	-369.067	-476.25
			-50.2012	100.402	-158.602	-188.452	-161.598	-30.7458	-115.539	-174.305	-142.927	-251.841	-161.598	-255.161	-239.49	-346.674
			150.603	-108.401	-138.251	-111.397	19.4554	-65.3376	-124.104	-92.7254	-201.64	-111.397	-204.959	-189.289	-296.473
			-259.004	-288.855	-262	-131.148	-215.941	-274.708	-243.329	-352.244	-262	-355.563	-339.893	-447.076
			-29.8506	-2.99589	127.856	43.0632	-15.7034	15.6753	-93.2394	-2.99589	-96.5587	-80.8885	-188.072
			26.8547	157.707	72.9137	14.1472	45.5259	-63.3889	26.8547	-66.7081	-51.038	-158.221
			130.852	46.0591	-12.7075	18.6712	-90.2436	0	-93.5628	-77.8926	-185.076
			-84.7929	-143.559	-112.181	-221.096	-130.852	-224.415	-208.745	-315.928
			-58.7665	-27.3878	-136.303	-46.0591	-139.622	-123.952	-231.135
			31.3787	-77.5361	12.7075	-80.8553	-65.1852	-172.369
			-108.915	-18.6712	-112.234	-96.5639	-203.747
			90.2436	-3.31925	12.3509	-94.8325
			-93.5628	-77.8926	-185.076
			15.6702	-91.5133
			-107.183
MT#1 (4)			85.4895	208.803	269.875	261.817	302.042	255.977	433.303	412.75	555.625	431.263	529.854	652.615	635	730.423	857.25	970.455	889.567	1000.12
			123.314	184.386	176.328	216.553	170.487	347.814	327.261	470.136	345.773	444.365	567.126	549.511	644.933	771.761	884.965	804.077	914.636
			61.072	53.0142	93.2394	47.1737	224.5	203.947	346.822	222.46	321.051	443.812	426.197	521.62	648.447	761.652	680.764	791.322
			-8.05779	32.1675	-13.8983	163.428	142.875	285.75	161.388	259.979	382.74	365.125	460.548	587.375	700.58	619.692	730.25
			40.2253	-5.84052	171.486	150.933	293.808	169.446	268.037	390.798	373.183	468.605	595.433	708.638	627.75	738.308
			-46.0658	131.261	110.708	253.583	129.22	227.812	350.573	332.958	428.38	555.208	668.412	587.524	698.083
			177.326	156.773	299.648	175.286	273.877	396.638	379.023	474.446	601.273	714.478	633.59	744.148
			-20.5532	122.322	-2.04046	96.551	219.312	201.697	297.119	423.947	537.152	456.264	566.822
			142.875	18.5127	117.104	239.865	222.25	317.673	444.5	557.705	476.817	587.375
			-124.362	-25.7709	96.9901	79.375	174.798	301.625	414.83	333.942	444.5
			98.5914	221.352	203.737	299.16	425.987	539.192	458.304	568.862
			122.761	105.146	200.568	327.396	440.601	359.713	470.271
			-17.6151	77.8075	204.635	317.84	236.952	347.51
			95.4225	222.25	335.455	254.567	365.125
			126.827	240.032	159.144	269.702
			113.205	32.3168	142.875
			-80.888	29.6703
			110.558
MT#2 (1)			-224.506	-323.788	-323.788	-354.976	-471.558	-445.632	-466.79	-423.422	-466.79	-444.625	-465.828	-423.422	-426.591	-550.392	-593.559	-486.905	-426.591	-444.625	-465.828	-510.753	-635.087	-720.409	-847.304	-934.23	-1079.97	-1080.8	-889.062	-1037.26	-953.971	-1164.26	-1186.47	-1334.55	-1587.82
			-99.2813	-99.2813	-130.469	-247.052	-221.126	-242.284	-198.916	-242.284	-220.119	-241.322	-198.916	-202.085	-325.886	-369.052	-262.399	-202.085	-220.119	-241.322	-286.247	-410.581	-495.903	-622.798	-709.723	-855.46	-856.292	-664.556	-812.756	-729.465	-939.75	-961.967	-1110.04	-1363.31
			0	-31.1881	-147.77	-121.845	-143.002	-99.6345	-143.002	-120.837	-142.041	-99.6345	-102.803	-226.604	-269.771	-163.117	-102.803	-120.837	-142.041	-186.965	-311.3	-396.621	-523.516	-610.442	-756.179	-757.011	-565.275	-713.475	-630.183	-840.469	-862.686	-1010.76	-1264.03
			-31.1881	-147.77	-121.845	-143.002	-99.6345	-143.002	-120.837	-142.041	-99.6345	-102.803	-226.604	-269.771	-163.117	-102.803	-120.837	-142.041	-186.965	-311.3	-396.621	-523.516	-610.442	-756.179	-757.011	-565.275	-713.475	-953.971	-840.469	-862.686	-1010.76	-1264.03
			-116.582	-90.6567	-111.814	-68.4464	-111.814	-89.6492	-110.852	-68.4464	-71.6153	-195.416	-238.583	-131.929	-71.6153	-89.6492	-110.852	-155.777	-280.112	-365.433	-492.328	-579.254	-724.991	-725.822	-534.087	-682.287	-598.995	-939.75	-831.498	-979.575	-1232.84
			25.9255	4.76796	48.1358	4.76796	26.933	5.72972	48.1358	44.9669	-78.834	-122.001	-15.3471	44.9669	26.933	5.72972	-39.195	-163.529	-248.851	-375.746	-462.672	-608.409	-609.24	-417.504	-565.705	-482.413	-692.699	-862.686	-862.993	-1116.26
			-21.1575	22.2103	-21.1575	1.00752	-20.1958	22.2103	19.0414	-104.759	-147.926	-41.2726	19.0414	1.00752	-20.1958	-65.1205	-189.455	-274.777	-401.672	-488.597	-634.334	-635.166	-443.43	-591.63	-508.339	-718.624	-740.841	-1010.76	-1142.18
			43.3678	0	22.1651	0.961754	43.3678	40.199	-83.6019	-126.769	-20.1151	40.199	22.1651	0.961754	-43.963	-168.297	-253.619	-380.514	-467.44	-613.177	-614.008	-422.272	-570.473	-487.181	-697.467	-719.683	-867.761	-1232.84
			-43.3678	-21.2027	-42.4061	0	-3.16882	-126.97	-170.137	-63.4829	-3.16882	-21.2027	-42.4061	-87.3308	-211.665	-296.987	-423.882	-510.807	-656.545	-657.376	-465.64	-613.84	-530.549	-740.834	-763.051	-911.129	-1164.4
			22.1651	0.961754	43.3678	40.199	-83.6019	-126.769	-20.1151	40.199	22.1651	0.961754	-43.963	-168.297	-253.619	-380.514	-467.44	-613.177	-614.008	-422.272	-570.473	-487.181	-697.467	-719.683	-867.761	-1121.03
			-21.2033	21.2027	18.0339	-105.767	-148.934	-42.2801	18.0339	0	-21.2033	-66.1281	-190.463	-275.784	-402.679	-489.605	-635.342	-636.173	-444.438	-592.638	-509.346	-719.632	-741.849	-889.926	-1143.19
			42.4061	39.2372	-84.5637	-127.73	-21.0768	39.2372	21.2033	0	-44.9247	-169.259	-254.581	-381.476	-468.401	-614.139	-614.97	-423.234	-571.434	-488.143	-698.428	-720.645	-868.723	-1121.99
			-3.16882	-126.97	-170.137	-63.4829	-3.16882	-21.2027	-42.4061	-87.3308	-211.665	-296.987	-423.882	-510.807	-656.545	-657.376	-465.64	-613.84	-530.549	-740.834	-763.051	-911.129	-1164.4
			-123.801	-166.968	-60.3141	0	-18.0339	-39.2372	-84.162	-208.496	-293.818	-420.713	-507.639	-653.376	-654.207	-462.471	-610.672	-527.38	-737.666	-759.882	-907.96	-1161.23
			-43.1668	63.4868	123.801	105.767	84.5637	39.6389	-84.6955	-170.017	-296.912	-383.838	-529.575	-530.406	-338.671	-486.871	-403.579	-613.865	-636.082	-784.159	-1037.43
			106.654	166.968	148.934	127.73	82.8057	-41.5287	-126.85	-253.745	-340.671	-486.408	-487.239	-295.504	-443.704	-360.412	-570.698	-592.915	-740.992	-994.259
			60.3141	42.2801	21.0768	-23.8479	-148.182	-233.504	-360.399	-447.325	-593.062	-593.893	-402.157	-550.357	-467.066	-677.352	-699.568	-847.646	-1100.91
			-18.0339	-39.2372	-84.162	-208.496	-293.818	-420.713	-507.639	-653.376	-654.207	-462.471	-610.672	-527.38	-737.666	-759.882	-907.96	-1161.23
			-21.2033	-66.1281	-190.463	-275.784	-402.679	-489.605	-635.342	-636.173	-444.438	-592.638	-509.346	-719.632	-741.849	-889.926	-1143.19
			-44.9247	-169.259	-254.581	-381.476	-468.401	-614.139	-614.97	-423.234	-571.434	-488.143	-698.428	-720.645	-868.723	-1121.99
			-124.334	-209.656	-336.551	-423.477	-569.214	-570.045	-378.309	-526.51	-443.218	-653.504	-675.72	-823.798	-1077.06
			-85.3215	-212.217	-299.142	-444.879	-445.711	-253.975	-402.175	-318.884	-529.169	-551.386	-699.464	-952.73
			-126.895	-213.821	-359.558	-360.389	-168.654	-316.854	-233.562	-443.848	-466.065	-614.142	-867.408
			-86.9256	-232.663	-233.494	-41.7584	-189.958	-106.667	-316.953	-339.169	-487.247	-740.513
			-145.737	-146.569	45.1671	-103.033	-19.7415	-230.027	-252.244	-400.322	-653.588
			-0.831462	190.904	42.7042	125.996	-84.2899	-106.507	-254.584	-507.851
			191.736	43.5357	126.827	-83.4584	-105.675	-253.753	-507.019
			-148.2	-64.9086	-275.194	-297.411	-445.489	-698.755
			83.2914	-126.994	-149.211	-297.289	-550.555
			-210.286	-232.502	-380.58	-633.846
			-22.2168	-170.294	-423.561
			-148.078	-401.344
			-253.266
MT#2 (2)			278.439	381.59	533.005	487.253	550.7	487.253	511.953	446.507	508.443	381.59	254.884
			103.15	254.566	208.813	272.26	208.813	233.514	168.068	230.003	103.15	-23.5555
			151.415	105.663	169.11	105.663	130.364	64.9175	126.853	0	-126.706
			-45.7523	17.6945	-45.7523	-21.0517	-86.4978	-24.5625	-151.415	-278.121
			63.4468	0	24.7006	-40.7455	21.1897	-105.663	-232.369
			-63.4468	-38.7462	-104.192	-42.257	-169.11	-295.816
			24.7006	-40.7455	21.1897	-105.663	-232.369
			-65.4461	-3.51082	-130.364	-257.069
			61.9352	-64.9175	-191.623
			-126.853	-253.559
			-126.706
MT#2 (4)			-152.588	-105.766	-303.019	-217.904	-265.18	-390.276	-682.552	-514.993	-369.599	-331.235	-401.609	-322.362	-107.871	225.013	170.646	265.292	170.646	105.766	170.599	334.661	221.027	657.179	763.173	967.427	1100.04	934.477	901.249	988.316	727.443	585.441	436.385	303.099	195.179	-165.29	-113.931	-265.18	-236.601	-410.882	-509.757	-743.508	-890.011	-931.53	-847.638	-984.779
			46.8224	-150.431	-65.3156	-112.592	-237.688	-529.964	-362.405	-217.011	-178.647	-249.021	-169.774	44.7169	377.601	323.234	417.88	323.234	258.354	323.187	487.249	373.615	809.767	915.761	1120.02	1252.63	1087.07	1053.84	1140.9	880.031	738.029	588.973	455.687	347.767	-12.7018	38.6571	-112.592	-84.0133	-258.294	-357.169	-590.92	-737.423	-778.942	-695.05	-832.191
			-197.254	-112.138	-159.415	-284.51	-576.786	-409.228	-263.834	-225.469	-295.844	-216.597	-2.10554	330.778	276.412	371.058	276.412	211.531	276.364	440.427	326.793	762.945	868.938	1073.19	1205.81	1040.24	1007.01	1094.08	833.208	691.207	542.15	408.865	300.945	-59.5242	-8.16535	-159.415	-130.836	-305.116	-403.992	-637.742	-784.246	-825.764	-741.872	-879.014
			85.1155	37.8387	-87.2565	-379.533	-211.974	-66.5802	-28.2159	-98.5901	-19.343	195.148	528.032	473.665	568.311	473.665	408.785	473.618	637.68	524.046	960.198	1066.19	1270.45	1403.06	1237.5	1204.27	1291.34	727.443	888.46	739.404	606.118	498.198	137.729	189.088	37.8387	66.4178	-107.863	-206.738	-440.488	-586.992	-628.51	-544.619	-681.76
			-47.2768	-172.372	-464.648	-297.09	-151.696	-113.331	-183.706	-104.459	110.032	442.916	388.55	483.196	388.55	323.669	388.502	552.565	438.931	875.083	981.076	1185.33	1317.94	1152.38	1119.15	1206.22	945.346	738.029	654.288	521.003	413.083	52.6138	103.973	-47.2768	-18.6977	-192.978	-291.854	-525.604	-672.108	-713.626	-629.734	-766.876
			-125.095	-417.372	-249.813	-104.419	-66.0546	-136.429	-57.1817	157.309	490.193	435.826	530.472	435.826	370.946	435.779	599.841	486.207	922.36	1028.35	1232.61	1365.22	1199.66	1166.43	1253.5	992.623	850.621	542.15	568.279	460.36	99.8906	151.249	0	28.5791	-145.702	-244.577	-478.327	-624.831	-666.349	-582.457	-719.599
			-292.276	-124.718	20.6763	59.0407	-11.3336	67.9135	282.405	615.288	560.922	655.568	560.922	496.041	560.874	724.937	611.303	1047.45	1153.45	1357.7	1490.32	1324.75	1291.52	1378.59	1117.72	975.717	826.66	606.118	585.455	224.986	276.345	125.095	153.674	-20.6063	-119.482	-353.232	-499.736	-541.254	-457.362	-594.504
			167.559	312.953	351.317	280.943	360.19	574.681	907.565	853.198	947.844	853.198	788.318	853.151	1017.21	903.579	1339.73	1445.72	1649.98	1782.59	1617.03	1583.8	1670.87	1409.99	1267.99	1118.94	985.651	413.083	517.262	568.621	417.372	445.951	271.67	172.795	-60.9556	-207.459	-248.978	-165.086	-302.227
			145.394	183.758	113.384	192.631	407.122	740.006	685.639	780.285	685.639	620.759	685.592	849.654	736.02	1172.17	1278.17	1482.42	1615.03	1449.47	1416.24	1503.31	1242.44	1100.43	951.378	818.092	710.172	99.8906	401.062	249.813	278.392	104.111	5.23599	-228.514	-375.018	-416.536	-332.644	-469.786
			38.3643	-32.0099	47.2372	261.728	594.612	540.245	634.891	540.245	475.365	540.198	704.26	590.626	1026.78	1132.77	1337.03	1469.64	1304.08	1270.85	1357.92	1097.04	955.04	805.984	672.698	564.779	204.309	276.345	104.419	132.998	-41.2827	-140.158	-373.908	-520.412	-561.93	-478.038	-615.18
			-70.3742	8.87286	223.364	556.248	501.881	596.527	501.881	437.001	501.834	665.896	552.262	988.414	1094.41	1298.66	1431.27	1265.71	1232.48	1319.55	1058.68	916.676	767.62	634.334	526.414	165.945	217.304	417.372	94.6337	-79.647	-178.522	-412.273	-558.776	-600.295	-516.403	-653.544
			79.2471	293.738	626.622	572.255	666.901	572.255	507.375	572.208	736.27	622.636	1058.79	1164.78	1369.04	1501.65	1336.09	1302.86	1389.93	1129.05	987.05	837.994	704.708	596.788	236.319	287.678	136.429	278.392	-9.27278	-108.148	-341.898	-488.402	-529.92	-446.028	-583.17
			214.491	547.375	493.008	587.654	493.008	428.128	492.961	657.023	543.389	979.541	1085.53	1289.79	1422.4	1256.84	1223.61	1310.68	1049.8	907.803	758.747	625.461	517.541	157.072	208.431	57.1817	85.7608	-41.2827	-187.395	-421.145	-567.649	-609.167	-525.276	-662.417
			332.884	278.517	373.163	278.517	213.637	278.47	442.532	328.898	765.05	871.044	1075.3	1207.91	1042.35	1009.12	1096.19	835.314	693.312	544.256	410.97	303.05	-57.4187	-6.05981	-157.309	-128.73	-303.011	-178.522	-635.636	-782.14	-823.658	-739.767	-876.908
			-54.3669	40.2792	-54.3669	-119.247	-54.4141	109.648	-3.98571	432.166	538.16	742.415	875.027	709.464	676.236	763.303	502.43	360.428	211.372	78.0862	-29.8336	-390.303	-338.944	-490.193	-461.614	-635.895	-734.77	-341.898	-1115.02	-1156.54	-1072.65	-1209.79
			94.646	0	-64.8803	-0.0472652	164.015	50.3811	486.533	592.527	796.781	929.394	763.831	730.603	817.67	556.797	414.795	265.739	132.453	24.5333	-335.936	-284.577	-435.826	-407.247	-581.528	-680.403	-914.154	-567.649	-1102.18	-1018.28	-1155.43
			-94.646	-159.526	-94.6933	69.3691	-44.2649	391.887	497.881	702.135	834.748	669.185	635.957	723.024	462.151	320.149	171.093	37.8071	-70.1127	-430.582	-379.223	-530.472	-501.893	-676.174	-775.049	-1008.8	-1155.3	-823.658	-1112.93	-1250.07
			-64.8803	-0.0472652	164.015	50.3811	486.533	592.527	796.781	929.394	763.831	730.603	817.67	556.797	414.795	265.739	132.453	24.5333	-335.936	-284.577	-435.826	-407.247	-581.528	-680.403	-914.154	-1060.66	-1102.18	-1072.65	-1155.43
			64.833	228.895	115.261	551.414	657.407	861.662	994.274	828.711	795.483	882.55	621.677	479.675	330.619	197.333	89.4136	-271.055	-219.697	-370.946	-342.367	-516.648	-615.523	-849.273	-995.777	-1037.3	-953.403	-1155.43
			164.062	50.4284	486.581	592.574	796.829	929.441	763.878	730.65	817.717	556.844	414.842	265.786	132.5	24.5805	-335.888	-284.53	-435.779	-407.2	-581.481	-680.356	-914.106	-1060.61	-1102.13	-1018.24	-1155.38
			-113.634	322.518	428.512	632.766	765.379	599.816	566.588	653.655	392.782	250.78	101.724	-31.562	-139.482	-499.951	-448.592	-599.841	-571.262	-745.543	-844.418	-1078.17	-1224.67	-1266.19	-1182.3	-1319.44
			436.152	542.146	746.4	879.013	713.45	680.222	767.289	506.416	364.414	215.358	82.0719	-25.8479	-386.317	-334.958	-486.207	-457.628	-631.909	-730.784	-964.535	-1111.04	-1152.56	-1068.66	-1205.81
			105.994	310.248	442.86	277.298	244.07	331.137	70.2635	-71.7381	-220.795	-354.08	-462	-822.469	-771.11	-922.36	-893.78	-1068.06	-1166.94	-1400.69	-1547.19	-1588.71	-1504.82	-1641.96
			204.255	336.867	171.304	138.076	225.143	-35.73	-177.732	-326.788	-460.074	-567.994	-928.463	-877.104	-1028.35	-999.774	-1174.05	-1272.93	-1506.68	-1653.18	-1694.7	-1610.81	-1747.95
			132.612	-32.9503	-66.1786	20.8887	-239.985	-381.986	-531.043	-664.328	-772.248	-1132.72	-1081.36	-1232.61	-1204.03	-1378.31	-1477.18	-1710.93	-1857.44	-1898.96	-1815.07	-1952.21
			-165.563	-198.791	-111.724	-372.597	-514.599	-663.655	-796.941	-904.86	-1265.33	-1213.97	-1365.22	-1336.64	-1510.92	-1609.8	-1843.55	-1990.05	-2031.57	-1947.68	-2084.82
			-33.2283	53.839	-207.034	-349.036	-498.092	-631.378	-739.298	-1099.77	-1048.41	-1199.66	-1171.08	-1345.36	-1444.23	-1677.98	-1824.49	-1866.01	-1782.11	-1919.26
			87.0673	-173.806	-315.808	-464.864	-598.15	-706.07	-1066.54	-1015.18	-1166.43	-1137.85	-1312.13	-1411.01	-1644.76	-1791.26	-1832.78	-1748.89	-1886.03
			-260.873	-402.875	-551.931	-685.217	-793.137	-1153.61	-1102.25	-1253.5	-1224.92	-1399.2	-1498.07	-1731.82	-1878.33	-1919.85	-1835.95	-1973.1
			-142.002	-291.058	-424.344	-532.263	-892.732	-841.374	-992.623	-964.044	-1138.32	-1237.2	-1470.95	-1617.45	-1658.97	-1575.08	-1712.22
			-149.056	-282.342	-390.262	-750.731	-699.372	-850.621	-822.042	-996.323	-1095.2	-1328.95	-1475.45	-1516.97	-1433.08	-1570.22
			-133.286	-241.205	-601.674	-550.316	-701.565	-672.986	-847.267	-946.142	-1179.89	-1326.4	-1367.91	-1284.02	-1421.16
			-107.92	-468.389	-417.03	-568.279	-539.7	-713.981	-812.856	-1046.61	-1193.11	-1234.63	-1150.74	-1287.88
			-360.469	-309.11	-460.36	-431.78	-606.061	-704.936	-938.687	-1085.19	-1126.71	-1042.82	-1179.96
			51.3589	-99.8906	-71.3115	-245.592	-344.467	-578.218	-724.722	-766.24	-682.348	-819.489
			-151.249	-122.67	-296.951	-395.826	-629.577	-776.08	-817.599	-733.707	-870.848
			28.5791	-145.702	-244.577	-478.327	-624.831	-666.349	-582.457	-719.599
			-174.281	-273.156	-506.906	-653.41	-694.928	-611.036	-748.178
			-98.8753	-332.626	-479.129	-520.648	-436.756	-573.897
			-233.75	-380.254	-421.772	-337.88	-475.022
			-146.504	-188.022	-104.13	-241.272
			-41.5182	42.3737	-94.7679
			83.8919	-53.2497
			-137.142
MT#2 (6)			-449.013	-825.5	-1443.18	-2582.38	-2710.04	-3323.48	-3472.32	-4593.4
			-376.487	-994.17	-2133.37	-2261.02	-2874.47	-3023.31	-4144.39
			-617.683	-1756.88	-1884.54	-2497.98	-2646.82	-3767.9
			-1139.2	-1266.85	-1880.3	-2029.14	-3150.22
			-127.657	-741.102	-889.943	-2011.03
			-613.445	-762.286	-1883.37
			-148.842	-1269.92
			-1121.08
MT#3 (1)			-87.3237	-303.019	-877.035	-718.722	-1176.45	-1299.69	-1664.52	-2152.83	-2245.06	-2368.11	-2571.77	-2756.95	-2765.44	-3048.1	-3447.82	-3637.34	-4090.6	-3962.01	-4387.38	-4719.98	-4932.74	-5061.17	-5063.26	-5212.72	-5217.19	-5189.63	-5383.41	-5122.42	-5120.54	-5240.63	-5438.68	-5291.04
			-215.695	-789.711	-631.399	-1089.13	-1212.36	-1577.19	-2065.5	-2157.74	-2280.78	-2484.44	-2669.63	-2678.11	-2960.78	-3360.5	-3550.01	-4003.27	-3874.69	-4300.06	-4632.65	-4845.42	-4973.85	-4975.93	-5125.4	-5129.86	-5102.31	-5296.08	-5035.1	-5033.21	-5153.3	-5351.36	-5203.71
			-574.016	-415.703	-873.434	-996.668	-1361.5	-1849.81	-1942.04	-2065.09	-2268.75	-2453.93	-2462.42	-2745.08	-3144.8	-3334.32	-3787.58	-3658.99	-4084.36	-4416.96	-4629.72	-4758.15	-4760.24	-4909.7	-4914.17	-4886.61	-5080.39	-4819.4	-4817.52	-4937.61	-5135.67	-4988.02
			158.313	-299.418	-422.652	-787.484	-1275.79	-1368.03	-1491.07	-1694.73	-1879.92	-1888.4	-2171.07	-2570.79	-2760.3	-3213.56	-3084.98	-3510.35	-3842.94	-4055.71	-4184.14	-4186.22	-4335.69	-4340.15	-4312.6	-4506.37	-4245.39	-5120.54	-4363.59	-4561.65	-4414
			-457.731	-580.965	-945.796	-1434.11	-1526.34	-1649.39	-1853.04	-2038.23	-2046.71	-2329.38	-2729.1	-2918.62	-3371.87	-3243.29	-3668.66	-4001.25	-4214.02	-4342.45	-4344.54	-4494	-4498.46	-4470.91	-4664.69	-4403.7	-4401.82	-5153.3	-4719.96	-4572.31
			-123.234	-488.065	-976.374	-1068.61	-1191.66	-1395.31	-1580.5	-1588.98	-1871.65	-2271.37	-2460.89	-2914.14	-2785.56	-3210.93	-3543.52	-3756.29	-3884.72	-3886.8	-4036.27	-4040.73	-4013.18	-4206.96	-3945.97	-3944.09	-4064.17	-5135.67	-4114.58
			-364.831	-853.14	-945.377	-1068.42	-1272.08	-1457.27	-1465.75	-1748.41	-2148.14	-2337.65	-2790.91	-2662.33	-3087.69	-3420.29	-3633.06	-3761.49	-3763.57	-3913.04	-3917.5	-3889.95	-4083.72	-3822.74	-3820.85	-3940.94	-4139	-4414
			-488.309	-580.546	-703.59	-907.248	-1092.43	-1100.92	-1383.58	-1783.31	-1972.82	-2426.08	-2297.49	-2722.86	-3055.46	-3268.22	-3396.66	-3398.74	-3548.21	-3552.67	-3525.11	-3718.89	-3457.9	-3456.02	-3576.11	-3774.17	-3626.52
			-92.2365	-215.281	-418.939	-604.126	-612.61	-895.272	-1295	-1484.51	-1937.77	-1809.19	-2234.55	-2567.15	-2779.91	-2908.35	-2910.43	-3059.9	-3064.36	-3036.8	-3230.58	-2969.6	-2967.71	-3087.8	-3285.86	-3138.21
			-123.045	-326.703	-511.889	-520.373	-803.036	-1202.76	-1392.27	-1845.53	-1716.95	-2142.32	-2474.91	-2687.68	-2816.11	-2818.19	-2967.66	-2972.12	-2944.57	-3138.34	-2877.36	-2875.47	-2995.56	-3193.62	-3045.97
			-203.658	-388.845	-397.328	-679.991	-1079.72	-1269.23	-1722.49	-1593.9	-2019.27	-2351.87	-2564.63	-2693.06	-2695.15	-2844.62	-2849.08	-2821.52	-3015.3	-2754.31	-2752.43	-2872.52	-3070.58	-2922.93
			-185.187	-193.671	-476.333	-876.057	-1065.57	-1518.83	-1390.25	-1815.61	-2148.21	-2360.98	-2489.41	-2491.49	-2640.96	-2645.42	-2617.87	-2811.64	-2550.66	-2548.77	-2668.86	-2866.92	-2719.27
			-8.48386	-291.147	-690.871	-880.385	-1333.64	-1205.06	-1630.43	-1963.02	-2175.79	-2304.22	-2306.3	-2455.77	-2460.23	-2432.68	-2626.45	-2365.47	-2363.59	-2483.67	-2681.73	-2534.08
			-282.663	-682.387	-871.901	-1325.16	-1196.58	-1621.94	-1954.54	-2167.31	-2295.74	-2297.82	-2447.29	-2451.75	-2424.2	-2617.97	-2356.99	-2355.1	-2475.19	-2673.25	-2525.6
			-399.724	-589.238	-1042.5	-913.913	-1339.28	-1671.88	-1884.64	-2013.07	-2015.16	-2164.62	-2169.09	-2141.53	-2335.31	-2074.32	-2072.44	-2192.53	-2390.58	-2242.94
			-189.514	-642.773	-514.189	-939.556	-1272.15	-1484.92	-1613.35	-1615.43	-1764.9	-1769.36	-1741.81	-1935.58	-1674.6	-1672.71	-1792.8	-1990.86	-1843.21
			-453.258	-324.675	-750.042	-1082.64	-1295.4	-1423.84	-1425.92	-1575.39	-1579.85	-1552.29	-1746.07	-1485.08	-1483.2	-1603.29	-1801.35	-1653.7
			128.583	-296.783	-629.38	-842.146	-970.577	-972.661	-1122.13	-1126.59	-1099.04	-1292.81	-1031.83	-1029.94	-1150.03	-1348.09	-1200.44
			-425.367	-757.964	-970.729	-1099.16	-1101.24	-1250.71	-1255.17	-1227.62	-1421.39	-1160.41	-1158.53	-1278.61	-1476.67	-1329.02
			-332.597	-545.362	-673.794	-675.877	-825.344	-829.807	-802.252	-996.028	-735.043	-733.158	-853.245	-1051.3	-903.655
			-212.766	-341.197	-343.281	-492.747	-497.21	-469.655	-663.431	-402.446	-400.562	-520.648	-718.708	-571.059
			-128.431	-130.515	-279.981	-284.445	-256.89	-450.666	-189.681	-187.796	-307.883	-505.942	-358.293
			-2.08392	-151.55	-156.014	-128.459	-322.235	-61.2495	-59.3649	-179.452	-377.511	-229.862
			-149.466	-153.93	-126.375	-320.151	-59.1656	-57.281	-177.368	-375.427	-227.778
			-4.46313	23.0916	-170.684	90.3008	92.1855	-27.9013	-225.961	-78.3115
			27.5548	-166.221	94.764	96.6486	-23.4382	-221.498	-73.8483
			-193.776	67.2092	69.0939	-50.993	-249.053	-101.403
			260.985	262.87	142.783	-55.2766	92.3728
			1.88467	-118.202	-316.262	-168.612
			-120.087	-318.146	-170.497
			-198.06	-50.4101
			147.649
MT#5 (1)			89.8026	-42.291	-462.287	-808.726	-751.599	-937.28	-847.638	-1019.51	-1316.55	-1720.88	-2251.66	-2636.84	-2677.14	-2978.07	-3099.05	-3352.38	-3384.68	-3612.27	-3735.43	-3819.92	-3969.16	-4275.51	-4526.39	-4904.32	-5027.91	-5099.41	-5414.07	-5586.23	-5758.53	-6034.53	-6117.13
			-132.094	-552.09	-898.529	-841.401	-1027.08	-937.44	-1109.32	-1406.35	-1810.69	-2341.46	-2726.65	-2766.94	-3067.87	-3188.85	-3442.19	-3474.48	-3702.07	-3825.24	-3909.72	-4058.96	-4365.31	-4616.2	-4994.12	-5117.72	-5189.21	-5503.88	-5676.03	-5848.34	-6124.33	-6206.93
			-419.996	-766.435	-709.308	-894.989	-805.347	-977.224	-1274.26	-1678.59	-2209.36	-2594.55	-2634.85	-2935.78	-3056.76	-3310.09	-3342.39	-3569.98	-3693.14	-3777.63	-3926.87	-4233.21	-4484.1	-4862.03	-4985.62	-5057.12	-5371.78	-5543.94	-5716.24	-5992.24	-6074.84
			-346.439	-289.312	-474.993	-385.351	-557.228	-854.261	-1258.6	-1789.37	-2174.56	-2214.85	-2515.78	-2636.76	-2890.1	-2922.39	-3149.98	-3273.15	-3357.63	-3506.87	-3813.22	-4064.11	-4442.03	-4565.63	-4637.12	-4951.79	-5123.94	-5758.53	-5572.24	-5654.84
			57.1277	-128.554	-38.9114	-210.788	-507.822	-912.157	-1442.93	-1828.12	-1868.41	-2169.34	-2290.32	-2543.66	-2575.95	-2803.55	-2926.71	-3011.19	-3160.43	-3466.78	-3717.67	-4095.6	-4219.19	-4290.68	-4605.35	-4777.5	-4949.81	-6124.33	-5308.4
			-185.682	-96.0392	-267.916	-564.95	-969.285	-1500.06	-1885.25	-1925.54	-2226.47	-2347.45	-2600.78	-2633.08	-2860.67	-2983.83	-3068.32	-3217.56	-3523.91	-3774.8	-4152.72	-4276.31	-4347.81	-4662.47	-4834.63	-5006.93	-5282.93	-6074.84
			89.6428	-82.2342	-379.268	-783.603	-1314.37	-1699.56	-1739.86	-2040.79	-2161.77	-2415.1	-2447.4	-2674.99	-2798.15	-2882.64	-3031.88	-3338.22	-3589.11	-3967.04	-4090.63	-4162.13	-4476.79	-4648.95	-4821.25	-5097.25	-5179.85
			-171.877	-468.911	-873.245	-1404.02	-1789.21	-1829.5	-2130.43	-2251.41	-2504.75	-2537.04	-2764.63	-2887.8	-2972.28	-3121.52	-3427.87	-3678.76	-4056.68	-4180.28	-4251.77	-4566.43	-4738.59	-4910.9	-5186.89	-5269.49
			-297.034	-701.368	-1232.14	-1617.33	-1657.63	-1958.55	-2079.53	-2332.87	-2365.16	-2592.76	-2715.92	-2800.4	-2949.64	-3255.99	-3506.88	-3884.81	-4008.4	-4079.9	-4394.56	-4566.71	-4739.02	-5015.01	-5097.62
			-404.335	-935.107	-1320.3	-1360.59	-1661.52	-1782.5	-2035.84	-2068.13	-2295.72	-2418.89	-2503.37	-2652.61	-2958.96	-3209.85	-3587.77	-3711.36	-3782.86	-4097.52	-4269.68	-4441.98	-4717.98	-4800.58
			-530.772	-915.961	-956.257	-1257.18	-1378.16	-1631.5	-1663.79	-1891.39	-2014.55	-2099.03	-2248.27	-2554.62	-2805.51	-3183.44	-3307.03	-3378.53	-3693.19	-3865.34	-4037.65	-4313.65	-4396.25
			-385.189	-425.485	-726.412	-847.392	-1100.73	-1133.02	-1360.62	-1483.78	-1568.26	-1717.5	-2023.85	-2274.74	-2652.67	-2776.26	-2847.75	-3162.42	-3334.57	-3506.88	-3782.87	-3865.48
			-40.2963	-341.223	-462.203	-715.539	-747.833	-975.427	-1098.59	-1183.07	-1332.31	-1638.66	-1889.55	-2267.48	-2391.07	-2462.57	-2777.23	-2949.38	-3121.69	-3397.69	-3480.29
			-300.926	-421.906	-675.243	-707.537	-935.131	-1058.29	-1142.78	-1292.02	-1598.36	-1849.25	-2227.18	-2350.77	-2422.27	-2736.93	-2909.09	-3081.39	-3357.39	-3439.99
			-120.98	-374.317	-406.61	-634.205	-757.367	-841.851	-991.089	-1297.44	-1548.33	-1926.25	-2049.85	-2121.34	-2436.01	-2608.16	-2780.47	-3056.46	-3139.06
			-253.337	-285.631	-513.225	-636.387	-720.871	-870.11	-1176.46	-1427.35	-1805.28	-1928.87	-2000.36	-2315.03	-2487.18	-2659.49	-2935.48	-3018.08
			-32.2939	-259.888	-383.05	-467.534	-616.773	-923.122	-1174.01	-1551.94	-1675.53	-1747.03	-2061.69	-2233.84	-2406.15	-2682.15	-2764.75
			-227.594	-350.756	-435.24	-584.479	-890.828	-1141.72	-1519.64	-1643.24	-1714.73	-2029.4	-2201.55	-2373.86	-2649.85	-2732.45
			-123.162	-207.646	-356.885	-663.234	-914.123	-1292.05	-1415.64	-1487.14	-1801.8	-1973.96	-2146.26	-2422.26	-2504.86
			-84.4841	-233.723	-540.072	-790.96	-1168.89	-1292.48	-1363.98	-1678.64	-1850.79	-2023.1	-2299.1	-2381.7
			-149.239	-455.588	-706.476	-1084.4	-1208	-1279.49	-1594.15	-1766.31	-1938.62	-2214.61	-2297.21
			-306.349	-557.238	-935.165	-1058.76	-1130.25	-1444.92	-1617.07	-1789.38	-2065.37	-2147.97
			-250.889	-628.816	-752.408	-823.905	-1138.57	-1310.72	-1483.03	-1759.02	-1841.62
			-377.928	-501.519	-573.016	-887.679	-1059.83	-1232.14	-1508.14	-1590.74
			-123.591	-195.088	-509.751	-681.905	-854.211	-1130.21	-1212.81
			-71.4967	-386.159	-558.314	-730.62	-1006.62	-1089.22
			-314.663	-486.817	-659.123	-935.12	-1017.72
			-172.154	-344.46	-620.457	-703.058
			-172.306	-448.303	-530.903
			-275.997	-358.597
			-82.6005
MT#5 (2)			105.918	-66.9483	-212.642	-381.59	-275.082	-133.897	-278.333	-320.304	-494.085	-529.143	-551.914	-806.794	-766.68	-685.503	-619.591	-699.779	-530.77	-488.564	-529.507	-456.945	-381.59	-232.791	-294.769	-425.411	-444.5	-381	-466.065
			-172.866	-318.56	-487.508	-381	-239.815	-384.251	-426.222	-600.003	-635.061	-657.832	-912.712	-872.598	-791.421	-725.509	-805.697	-636.688	-594.482	-635.425	-562.863	-487.508	-338.709	-400.687	-531.329	-550.418	-486.918	-571.983
			-145.694	-314.642	-208.134	-66.9483	-211.385	-253.356	-427.136	-462.195	-484.965	-739.846	-699.732	-618.555	-552.643	-632.831	-463.821	-421.616	-462.559	-389.997	-314.642	-165.843	-227.821	-358.463	-377.552	-314.052	-399.117
			-168.948	-62.4397	78.7458	-65.6909	-107.662	-281.442	-316.501	-339.271	-594.151	-554.038	-472.861	-406.949	-487.137	-318.127	-275.922	-316.865	-244.303	-168.948	-20.1487	-82.1266	-212.769	-231.858	-168.358	-253.422
			106.508	247.693	103.257	61.2857	-112.495	-147.553	-170.324	-425.204	-385.09	-303.913	-238.002	-318.189	-149.18	-106.974	-147.917	-75.3553	0	148.799	86.8209	-43.8212	-62.9101	0.589861	-84.475
			141.185	-3.25124	-45.2222	-219.003	-254.061	-276.832	-531.712	-491.598	-410.421	-344.509	-424.697	-255.688	-213.482	-254.425	-181.863	-106.508	42.291	-19.6869	-150.329	-169.418	-105.918	-190.983
			-144.437	-186.408	-360.188	-395.246	-418.017	-672.897	-632.783	-551.607	-485.695	-565.883	-396.873	-354.668	-395.61	-323.049	-247.693	-98.8944	-160.872	-291.514	-310.603	-247.103	-332.168
			-41.971	-215.751	-250.81	-273.58	-528.461	-488.347	-407.17	-341.258	-421.446	-252.436	-210.231	-251.174	-178.612	-103.257	45.5422	-16.4357	-147.078	-166.167	-102.667	-187.732
			-173.78	-208.839	-231.609	-486.49	-446.376	-365.199	-299.287	-379.475	-210.465	-168.26	-209.203	-136.641	-61.2857	87.5132	25.5353	-105.107	-124.196	-60.6958	-145.761
			-35.0584	-57.8291	-312.709	-272.595	-191.419	-125.507	-205.694	-36.6849	5.5205	-35.4223	37.1394	112.495	261.294	199.316	68.6736	49.5846	113.085	28.0198
			-22.7707	-277.651	-237.537	-156.36	-90.4484	-170.636	-1.62656	40.5789	-0.363959	72.1978	147.553	296.352	234.374	103.732	84.643	148.143	63.0781
			-254.88	-214.766	-133.59	-67.6777	-147.865	21.1442	63.3496	22.4068	94.9685	170.324	319.123	257.145	126.503	107.414	170.914	85.8489
			40.1139	121.29	187.202	107.015	276.024	318.23	277.287	349.849	425.204	574.003	512.025	381.383	362.294	425.794	340.729
			81.1766	147.089	66.9008	235.91	278.116	237.173	309.735	385.09	533.889	471.911	341.269	322.18	385.68	300.615
			65.9119	-14.2757	154.734	196.939	155.996	228.558	303.913	452.712	390.734	260.092	241.003	304.503	219.439
			-80.1877	88.8219	131.027	90.0845	162.646	238.002	386.8	324.822	194.18	175.091	238.591	153.527
			169.01	211.215	170.272	242.834	318.189	466.988	405.01	274.368	255.279	318.779	233.714
			42.2054	1.2626	73.8244	149.18	297.979	236.001	105.358	86.2695	149.77	64.7047
			-40.9428	31.6189	106.974	255.773	193.795	63.1531	44.0641	107.564	22.4993
			72.5618	147.917	296.716	234.738	104.096	85.0069	148.507	63.4421
			75.3553	224.154	162.176	31.5341	12.4452	75.9452	-9.11967
			148.799	86.8209	-43.8212	-62.9101	0.589861	-84.475
			-61.9779	-192.62	-211.709	-148.209	-233.274
			-130.642	-149.731	-86.2311	-171.296
			-19.089	44.411	-40.6538
			63.5	-21.5648
			-85.0648
MT#5 (3)			105.766	152.588	63.5	21.082	105.766	66.9082	76.294	-200.805	-241.285	-446.507	-354.846	-334.709	-395.415	-331.349	-598.714	-709.692	-598.714	-629.342	-552.04	-421.783	-581.209	-462.287	-378.66	-452.476	-482.715	-626.917	-806.044	-738.409	-950.7	-847.196	-1012.99	-1166.47	-1125.06	-1224.91	-1274.49	-1329.36	-1258.15	-1329.36	-1527.89	-1486.18	-1639.74	-1715.61	-1602.59	-1678.78	-1660.55	-1639.74	-1772.61
			46.8224	-42.2656	-84.6836	0	-38.8575	-29.4716	-306.57	-347.051	-552.273	-460.611	-440.475	-501.18	-437.114	-704.479	-815.457	-704.479	-735.107	-657.806	-527.549	-686.975	-568.053	-484.425	-558.241	-588.481	-732.682	-911.809	-844.175	-1056.47	-952.961	-1118.76	-1272.23	-1230.82	-1330.68	-1380.25	-1435.13	-1363.91	-1435.13	-1633.65	-1591.95	-1745.51	-1821.38	-1708.36	-1784.55	-1766.32	-1745.51	-1878.37	-1887.49
			-89.0881	-131.506	-46.8224	-85.6799	-76.294	-353.393	-393.873	-599.095	-507.434	-487.297	-548.003	-483.937	-751.302	-862.28	-751.302	-781.93	-704.628	-574.371	-733.797	-614.875	-531.248	-605.064	-635.303	-779.505	-958.632	-890.997	-1103.29	-999.784	-1165.58	-1319.05	-1277.64	-1377.5	-1427.07	-1481.95	-1410.74	-1481.95	-1680.47	-1638.77	-1792.33	-1868.2	-1755.18	-1831.37	-1813.14	-1792.33	-1925.19	-1934.31	-1918.57
			-42.418	42.2656	3.40815	12.794	-264.305	-304.785	-510.007	-418.346	-398.209	-458.915	-394.849	-662.214	-773.192	-662.214	-692.842	-615.54	-485.283	-644.709	-525.787	-442.16	-515.976	-546.215	-690.417	-869.544	-801.909	-950.7	-910.696	-1076.49	-1229.97	-1188.56	-1288.41	-1337.99	-1392.86	-1321.65	-1392.86	-1591.39	-1549.68	-1703.24	-1779.11	-1666.09	-1742.28	-1724.05	-1703.24	-1836.11	-1845.23	-1829.48	-1790.43
			84.6836	45.8262	55.212	-221.887	-262.367	-467.589	-375.928	-355.791	-416.497	-352.431	-619.796	-730.774	-619.796	-650.424	-573.122	-442.865	-602.291	-483.369	-399.742	-473.558	-503.797	-647.999	-827.126	-759.491	-971.782	-952.961	-1034.07	-1187.55	-1146.14	-1245.99	-1295.57	-1350.45	-1279.23	-1350.45	-1548.97	-1507.26	-1660.82	-1736.7	-1623.67	-1699.86	-1681.64	-1660.82	-1793.69	-1802.81	-1787.06	-1748.02	-1844.52
			-38.8575	-29.4716	-306.57	-347.051	-552.273	-460.611	-440.475	-501.18	-437.114	-704.479	-815.457	-704.479	-735.107	-657.806	-527.549	-686.975	-568.053	-484.425	-558.241	-588.481	-732.682	-911.809	-844.175	-1056.47	-952.961	-1165.58	-1272.23	-1230.82	-1330.68	-1380.25	-1435.13	-1363.91	-1435.13	-1633.65	-1591.95	-1745.51	-1821.38	-1708.36	-1784.55	-1766.32	-1745.51	-1878.37	-1887.49	-1871.75	-1832.7	-1929.21	-1917.37
			9.38588	-267.713	-308.193	-513.415	-421.754	-401.617	-462.323	-398.257	-665.622	-776.6	-665.622	-696.25	-618.948	-488.691	-648.117	-529.195	-445.568	-519.384	-549.623	-693.825	-872.952	-805.317	-1017.61	-914.104	-1079.9	-1229.97	-1191.96	-1291.82	-1341.39	-1396.27	-1325.06	-1396.27	-1594.79	-1553.09	-1706.65	-1782.52	-1669.5	-1745.69	-1727.46	-1706.65	-1839.52	-1848.63	-1832.89	-1793.84	-1890.35	-1878.52	-1901.74
			-277.099	-317.579	-522.801	-431.14	-411.003	-471.709	-407.643	-675.008	-785.986	-675.008	-705.636	-628.334	-498.077	-657.503	-538.581	-454.954	-528.77	-559.009	-703.211	-882.338	-814.703	-1026.99	-923.49	-1089.29	-1242.76	-1146.14	-1301.21	-1350.78	-1405.66	-1334.44	-1405.66	-1604.18	-1562.47	-1716.04	-1791.91	-1678.89	-1755.07	-1736.85	-1716.04	-1848.9	-1858.02	-1842.27	-1803.23	-1899.74	-1887.9	-1911.12	-1885.56
			-40.4805	-245.703	-154.041	-133.905	-194.61	-130.544	-397.909	-508.887	-397.909	-428.537	-351.236	-220.979	-380.404	-261.482	-177.855	-251.671	-281.91	-426.112	-605.239	-537.604	-749.895	-646.391	-812.187	-965.66	-924.252	-1330.68	-1073.68	-1128.56	-1057.34	-1128.56	-1327.08	-1285.38	-1438.94	-1514.81	-1401.79	-1477.98	-1459.75	-1438.94	-1571.8	-1580.92	-1565.18	-1526.13	-1622.64	-1610.8	-1634.03	-1608.46	-1696.33
			-205.222	-113.561	-93.424	-154.129	-90.0635	-357.429	-468.406	-357.429	-388.056	-310.755	-180.498	-339.924	-221.002	-137.375	-211.191	-241.43	-385.631	-564.759	-497.124	-709.414	-605.911	-771.706	-925.18	-883.771	-983.627	-1341.39	-1088.08	-1016.86	-1088.08	-1286.6	-1244.89	-1398.46	-1474.33	-1361.31	-1437.49	-1419.27	-1398.46	-1531.32	-1540.44	-1524.69	-1485.65	-1582.16	-1570.32	-1593.55	-1567.98	-1655.85	-1643.6
			91.6615	111.798	51.0927	115.159	-152.206	-263.184	-152.206	-182.834	-105.533	24.7241	-134.702	-15.7797	67.8475	-5.96851	-36.2078	-180.409	-359.536	-291.902	-504.192	-400.688	-566.484	-719.958	-678.549	-778.405	-827.978	-1405.66	-811.642	-882.856	-1081.38	-1039.67	-1193.23	-1269.11	-1156.09	-1232.27	-1214.05	-1193.23	-1326.1	-1335.22	-1319.47	-1280.43	-1376.93	-1365.1	-1388.32	-1362.76	-1450.63	-1438.38	-1439.62
			20.1366	-40.5689	23.4972	-243.868	-354.846	-243.868	-274.496	-197.195	-66.9374	-226.363	-107.441	-23.814	-97.63	-127.869	-272.071	-451.198	-383.563	-595.854	-492.35	-658.146	-811.619	-770.211	-870.066	-919.639	-974.518	-1057.34	-974.518	-1173.04	-1131.33	-1284.9	-1360.77	-1247.75	-1323.93	-1305.71	-1284.9	-1417.76	-1426.88	-1411.13	-1372.09	-1468.6	-1456.76	-1479.98	-1454.42	-1542.29	-1530.04	-1531.28	-1604.68
			-60.7054	3.36057	-264.004	-374.982	-264.004	-294.632	-217.331	-87.074	-246.5	-127.578	-43.9506	-117.767	-148.006	-292.207	-471.335	-403.7	-615.99	-512.486	-678.282	-831.756	-790.347	-890.203	-939.776	-994.655	-923.44	-1088.08	-1193.18	-1151.47	-1305.03	-1380.91	-1267.88	-1344.07	-1325.84	-1305.03	-1437.9	-1447.02	-1431.27	-1392.23	-1488.73	-1476.9	-1500.12	-1474.56	-1562.43	-1550.18	-1551.42	-1624.81	-1725.31
			64.066	-203.299	-314.277	-203.299	-233.927	-156.626	-26.3686	-185.794	-66.8723	16.7549	-57.0612	-87.3005	-231.502	-410.629	-342.994	-555.285	-451.781	-617.577	-771.05	-729.642	-829.497	-879.07	-933.949	-862.735	-933.949	-1081.38	-1090.77	-1244.33	-1320.2	-1207.18	-1283.37	-1265.14	-1244.33	-1377.19	-1386.31	-1370.57	-1331.52	-1428.03	-1416.19	-1439.42	-1413.85	-1501.72	-1489.47	-1490.71	-1564.11	-1664.6	-1616.23
			-267.365	-378.343	-267.365	-297.993	-220.692	-90.4346	-249.86	-130.938	-47.3112	-121.127	-151.366	-295.568	-474.695	-407.06	-619.351	-515.847	-681.643	-835.116	-793.708	-893.563	-943.136	-998.015	-926.801	-998.015	-1196.54	-1131.33	-1308.39	-1384.27	-1271.24	-1347.43	-1329.21	-1308.39	-1441.26	-1450.38	-1434.63	-1395.59	-1492.09	-1480.26	-1503.48	-1477.92	-1565.79	-1553.54	-1554.78	-1628.17	-1728.67	-1680.3	-1910.81
			-110.978	0	-30.628	46.6734	176.93	17.5046	136.427	220.054	146.238	115.999	-28.2028	-207.33	-139.695	-351.986	-248.482	-414.278	-567.751	-526.343	-626.198	-675.771	-730.65	-659.436	-730.65	-929.171	-887.466	-1305.03	-1116.9	-1003.88	-1080.07	-1061.84	-1041.03	-1173.89	-1183.01	-1167.27	-1128.22	-1224.73	-1212.89	-1236.12	-1210.55	-1298.42	-1286.17	-1287.41	-1360.81	-1461.3	-1412.93	-1643.45	-1520.7
			110.978	80.3499	157.651	287.908	128.482	247.405	331.032	257.216	226.976	82.775	-96.3522	-28.7176	-241.008	-137.504	-303.3	-456.773	-415.365	-515.22	-564.794	-619.672	-548.458	-619.672	-818.193	-776.488	-930.05	-1320.2	-892.901	-969.089	-950.862	-930.05	-1062.92	-1072.03	-1056.29	-1017.24	-1113.75	-1101.92	-1125.14	-1099.57	-1187.45	-1175.19	-1176.43	-1249.83	-1350.32	-1301.96	-1532.47	-1409.73	-1465.71
			-30.628	46.6734	176.93	17.5046	136.427	220.054	146.238	115.999	-28.2028	-207.33	-139.695	-351.986	-248.482	-414.278	-567.751	-526.343	-626.198	-675.771	-730.65	-659.436	-730.65	-929.171	-887.466	-1041.03	-1116.9	-1271.24	-1080.07	-1061.84	-1041.03	-1173.89	-1183.01	-1167.27	-1128.22	-1224.73	-1212.89	-1236.12	-1210.55	-1298.42	-1286.17	-1287.41	-1360.81	-1461.3	-1412.93	-1643.45	-1520.7	-1576.69	-1423.26
			77.3013	207.558	48.1326	167.055	250.682	176.866	146.627	2.42513	-176.702	-109.067	-321.358	-217.854	-383.65	-537.123	-495.715	-595.57	-645.143	-700.022	-628.808	-700.022	-898.543	-856.838	-1010.4	-1086.27	-973.251	-1080.07	-1031.21	-1010.4	-1143.27	-1152.38	-1136.64	-1097.59	-1194.1	-1182.27	-1205.49	-1179.92	-1267.8	-1255.54	-1256.78	-1330.18	-1430.67	-1382.31	-1612.82	-1490.07	-1546.06	-1392.64
			130.257	-29.1688	89.7533	173.381	99.5645	69.3252	-74.8762	-254.003	-186.369	-398.659	-295.155	-460.951	-614.425	-573.016	-672.872	-722.445	-777.323	-706.109	-777.323	-975.845	-934.139	-1087.7	-1163.57	-1050.55	-1126.74	-950.862	-1087.7	-1220.57	-1229.69	-1213.94	-1174.89	-1271.4	-1259.57	-1282.79	-1257.23	-1345.1	-1332.84	-1334.09	-1407.48	-1507.97	-1459.61	-1690.12	-1567.38	-1623.36	-1469.94
			-159.426	-40.5038	43.1234	-30.6926	-60.9319	-205.133	-384.261	-316.626	-528.916	-425.412	-591.208	-744.682	-703.273	-803.129	-852.702	-907.581	-836.366	-907.581	-1106.1	-1064.4	-1217.96	-1293.83	-1180.81	-1257	-1238.77	-1041.03	-1350.82	-1359.94	-1344.2	-1305.15	-1401.66	-1389.82	-1413.05	-1387.48	-1475.36	-1463.1	-1464.34	-1537.74	-1638.23	-1589.87	-1820.38	-1697.63	-1753.62	-1600.19
			118.922	202.549	128.733	98.494	-45.7074	-224.835	-157.2	-369.491	-265.987	-431.783	-585.256	-543.847	-643.703	-693.276	-748.155	-676.94	-748.155	-946.676	-904.971	-1058.53	-1134.41	-1021.38	-1097.57	-1079.34	-1058.53	-1143.27	-1200.52	-1184.77	-1145.73	-1242.23	-1230.4	-1253.62	-1228.06	-1315.93	-1303.68	-1304.92	-1378.31	-1478.81	-1430.44	-1660.95	-1538.21	-1594.19	-1440.77
			83.6272	9.81116	-20.4281	-164.63	-343.757	-276.122	-488.413	-384.909	-550.705	-704.178	-662.769	-762.625	-812.198	-867.077	-795.862	-867.077	-1065.6	-1023.89	-1177.45	-1253.33	-1140.31	-1216.49	-1198.27	-1177.45	-1310.32	-1229.69	-1303.69	-1264.65	-1361.16	-1349.32	-1372.54	-1346.98	-1434.85	-1422.6	-1423.84	-1497.24	-1597.73	-1549.36	-1779.88	-1657.13	-1713.11	-1559.69
			-73.816	-104.055	-248.257	-427.384	-359.749	-572.04	-468.536	-634.332	-787.805	-746.397	-846.252	-895.825	-950.704	-879.489	-950.704	-1149.23	-1107.52	-1261.08	-1336.96	-1223.93	-1300.12	-1281.89	-1261.08	-1393.95	-1403.07	-1344.2	-1348.27	-1444.78	-1432.95	-1456.17	-1430.61	-1518.48	-1506.23	-1507.47	-1580.86	-1681.36	-1632.99	-1863.5	-1740.76	-1796.74	-1643.32
			-30.2393	-174.441	-353.568	-285.933	-498.224	-394.72	-560.516	-713.989	-672.581	-772.436	-822.009	-876.888	-805.673	-876.888	-1075.41	-1033.7	-1187.27	-1263.14	-1150.12	-1226.3	-1208.08	-1187.27	-1320.13	-1329.25	-1313.5	-1145.73	-1370.97	-1359.13	-1382.35	-1356.79	-1444.66	-1432.41	-1433.65	-1507.05	-1607.54	-1559.17	-1789.69	-1666.94	-1722.92	-1569.5
			-144.201	-323.329	-255.694	-467.985	-364.481	-530.277	-683.75	-642.341	-742.197	-791.77	-846.649	-775.434	-846.649	-1045.17	-1003.46	-1157.03	-1232.9	-1119.88	-1196.06	-1177.84	-1157.03	-1289.89	-1299.01	-1283.26	-1244.22	-1361.16	-1328.89	-1352.12	-1326.55	-1414.42	-1402.17	-1403.41	-1476.81	-1577.3	-1528.93	-1759.45	-1636.7	-1692.68	-1539.26
			-179.127	-111.493	-323.783	-220.279	-386.075	-539.549	-498.14	-597.995	-647.569	-702.447	-631.233	-702.447	-900.969	-859.263	-1012.82	-1088.7	-975.676	-1051.86	-1033.64	-1012.82	-1145.69	-1154.81	-1139.06	-1100.02	-1196.53	-1432.95	-1207.91	-1182.35	-1270.22	-1257.97	-1259.21	-1332.61	-1433.1	-1384.73	-1615.25	-1492.5	-1548.48	-1395.06
			67.6347	-144.656	-41.1519	-206.948	-360.421	-319.013	-418.868	-468.441	-523.32	-452.105	-523.32	-721.841	-680.136	-833.697	-909.571	-796.549	-872.736	-854.51	-833.697	-966.563	-975.683	-959.936	-920.891	-1017.4	-1005.56	-1382.35	-1003.22	-1091.09	-1078.84	-1080.08	-1153.48	-1253.97	-1205.6	-1436.12	-1313.37	-1369.36	-1215.93
			-212.29	-108.787	-274.583	-428.056	-386.647	-486.503	-536.076	-590.955	-519.74	-590.955	-789.476	-747.771	-901.332	-977.206	-864.184	-940.371	-922.145	-901.332	-1034.2	-1043.32	-1027.57	-988.525	-1085.03	-1073.2	-1096.42	-1326.55	-1158.73	-1146.48	-1147.72	-1221.11	-1321.61	-1273.24	-1503.75	-1381.01	-1436.99	-1283.57
			103.504	-62.292	-215.765	-174.357	-274.212	-323.785	-378.664	-307.45	-378.664	-577.185	-535.48	-689.042	-764.915	-651.893	-728.08	-709.854	-689.042	-821.907	-831.027	-815.28	-776.235	-872.743	-860.907	-884.131	-858.566	-1270.22	-934.186	-935.427	-1008.82	-1109.32	-1060.95	-1291.46	-1168.72	-1224.7	-1071.28
			-165.796	-319.269	-277.861	-377.716	-427.289	-482.168	-410.954	-482.168	-680.689	-638.984	-792.545	-868.419	-755.397	-831.584	-813.358	-792.545	-925.411	-934.531	-918.784	-879.739	-976.247	-964.411	-987.635	-962.07	-1049.94	-1078.84	-1038.93	-1112.33	-1212.82	-1164.45	-1394.97	-1272.22	-1328.2	-1174.78
			-153.473	-112.065	-211.92	-261.493	-316.372	-245.158	-316.372	-514.893	-473.188	-626.749	-702.623	-589.601	-665.788	-647.562	-626.749	-759.615	-768.735	-752.988	-713.943	-810.451	-798.615	-821.839	-796.274	-884.147	-871.894	-1147.72	-946.531	-1047.02	-998.657	-1229.17	-1106.42	-1162.41	-1008.99
			41.4086	-58.4469	-108.02	-162.899	-91.6842	-162.899	-361.42	-319.715	-473.276	-549.15	-436.128	-512.315	-494.089	-473.276	-606.142	-615.261	-599.515	-560.469	-656.977	-645.142	-668.365	-642.801	-730.673	-718.42	-719.661	-1008.82	-893.55	-845.184	-1075.7	-952.952	-1008.93	-855.512
			-99.8555	-149.429	-204.307	-133.093	-204.307	-402.829	-361.123	-514.685	-590.559	-477.536	-553.724	-535.497	-514.685	-647.55	-656.67	-640.924	-601.878	-698.386	-686.551	-709.774	-684.21	-772.082	-759.829	-761.07	-834.467	-1212.82	-886.592	-1117.11	-994.36	-1050.34	-896.921
			-49.5731	-104.452	-33.2373	-104.452	-302.973	-261.268	-414.829	-490.703	-377.681	-453.868	-435.642	-414.829	-547.695	-556.815	-541.068	-502.022	-598.53	-586.695	-609.918	-584.354	-672.227	-659.973	-661.215	-734.611	-835.103	-998.657	-1017.25	-894.505	-950.488	-797.065
			-54.8787	16.3358	-54.8787	-253.4	-211.695	-365.256	-441.13	-328.108	-404.295	-386.069	-365.256	-498.122	-507.241	-491.495	-452.449	-548.957	-537.122	-560.345	-534.781	-622.653	-610.4	-611.641	-685.038	-785.53	-737.164	-1075.7	-844.931	-900.915	-747.492
			71.2145	0	-198.521	-156.816	-310.377	-386.251	-273.229	-349.416	-331.19	-310.377	-443.243	-452.363	-436.616	-397.571	-494.078	-482.243	-505.467	-479.902	-567.775	-555.521	-556.763	-630.159	-730.651	-682.285	-912.799	-994.36	-846.036	-692.613
			-71.2145	-269.736	-228.031	-381.592	-457.466	-344.443	-420.631	-402.405	-381.592	-514.458	-523.577	-507.831	-468.785	-565.293	-553.458	-576.681	-551.117	-638.989	-626.736	-627.977	-701.374	-801.866	-753.499	-984.014	-861.267	-950.488	-763.828
			-198.521	-156.816	-310.377	-386.251	-273.229	-349.416	-331.19	-310.377	-443.243	-452.363	-436.616	-397.571	-494.078	-482.243	-505.467	-479.902	-567.775	-555.521	-556.763	-630.159	-730.651	-682.285	-912.799	-790.053	-846.036	-747.492
			41.7052	-111.856	-187.73	-74.7076	-150.895	-132.669	-111.856	-244.722	-253.841	-238.095	-199.049	-295.557	-283.722	-306.945	-281.381	-369.253	-357	-358.241	-431.638	-532.13	-483.764	-714.278	-591.532	-647.515	-494.092
			-153.561	-229.435	-116.413	-192.6	-174.374	-153.561	-286.427	-295.547	-279.8	-240.755	-337.262	-325.427	-348.651	-323.086	-410.959	-398.705	-399.947	-473.343	-573.835	-525.469	-755.983	-633.237	-689.22	-535.797
			-75.8738	37.1485	-39.039	-20.8127	0	-132.866	-141.985	-126.239	-87.1933	-183.701	-171.866	-195.089	-169.525	-257.397	-245.144	-246.385	-319.782	-420.274	-371.908	-602.422	-479.675	-535.658	-382.236
			113.022	36.8348	55.0611	75.8738	-56.992	-66.1115	-50.3651	-11.3194	-107.827	-95.9921	-119.215	-93.651	-181.524	-169.27	-170.512	-243.908	-344.4	-296.034	-526.548	-403.802	-459.785	-306.362
			-76.1875	-57.9612	-37.1485	-170.014	-179.134	-163.387	-124.342	-220.85	-209.014	-232.238	-206.673	-294.546	-282.293	-283.534	-356.93	-457.422	-409.056	-639.57	-516.824	-572.807	-419.384
			18.2263	39.039	-93.8268	-102.946	-87.1999	-48.1543	-144.662	-132.827	-156.05	-130.486	-218.358	-206.105	-207.346	-280.743	-381.235	-332.869	-563.383	-440.636	-496.619	-343.197
			20.8127	-112.053	-121.173	-105.426	-66.3806	-162.888	-151.053	-174.277	-148.712	-236.585	-224.331	-225.573	-298.969	-399.461	-351.095	-581.609	-458.863	-514.846	-361.423
			-132.866	-141.985	-126.239	-87.1933	-183.701	-171.866	-195.089	-169.525	-257.397	-245.144	-246.385	-319.782	-420.274	-371.908	-602.422	-479.675	-535.658	-382.236
			-9.11955	6.62688	45.6726	-50.8353	-39.0001	-62.2235	-36.659	-124.532	-112.278	-113.52	-186.916	-287.408	-239.042	-469.556	-346.81	-402.793	-249.37
			15.7464	54.7921	-41.7157	-29.8805	-53.1039	-27.5395	-115.412	-103.159	-104.4	-177.797	-278.289	-229.922	-460.436	-337.69	-393.673	-240.251
			39.0457	-57.4621	-45.627	-68.8504	-43.2859	-131.158	-118.905	-120.146	-193.543	-294.035	-245.669	-476.183	-353.437	-409.42	-255.997
			-96.5078	-84.6726	-107.896	-82.3316	-170.204	-157.951	-159.192	-232.589	-333.081	-284.714	-515.229	-392.482	-448.465	-295.043
			11.8352	-11.3882	14.1762	-73.6963	-61.443	-62.6843	-136.081	-236.573	-188.206	-418.721	-295.974	-351.957	-198.535
			-23.2234	2.34106	-85.5315	-73.2782	-74.5195	-147.916	-248.408	-200.042	-430.556	-307.81	-363.793	-210.37
			25.5644	-62.3081	-50.0548	-51.2961	-124.693	-225.185	-176.818	-407.333	-284.586	-340.569	-187.147
			-87.8725	-75.6192	-76.8606	-150.257	-250.749	-202.383	-432.897	-310.151	-366.134	-212.711
			12.2533	11.012	-62.3846	-162.877	-114.51	-345.024	-222.278	-278.261	-124.839
			-1.24131	-74.6379	-175.13	-126.763	-357.278	-234.531	-290.514	-137.092
			-73.3966	-173.888	-125.522	-356.036	-233.29	-289.273	-135.851
			-100.492	-52.1256	-282.64	-159.893	-215.877	-62.454
			48.3664	-182.148	-59.4016	-115.385	38.0379
			-230.514	-107.768	-163.751	-10.3285
			122.746	66.7634	220.186
			-55.983	97.4394
			153.422
MT#5 (4)			-339.246	-804.291	-1736.1	-2392.17	-2922.92	-3493.53	-4065.38	-4785.88	-5189.29	-5678.27	-5890.72	-6714.6
			-465.045	-1396.85	-2052.92	-2583.67	-3154.28	-3726.13	-4446.63	-4850.04	-5339.02	-5551.48	-6375.35
			-931.809	-1587.88	-2118.63	-2689.24	-3261.09	-3981.59	-4385	-4873.97	-5086.43	-5910.31
			-656.067	-1186.82	-1757.43	-2329.28	-3049.78	-3453.19	-3942.17	-4154.62	-4978.5
			-530.753	-1101.36	-1673.21	-2393.71	-2797.12	-3286.1	-3498.56	-4322.43
			-570.607	-1142.46	-1862.96	-2266.37	-2755.35	-2967.8	-3791.68
			-571.853	-1292.35	-1695.76	-2184.74	-2397.2	-3221.07
			-720.497	-1123.91	-1612.89	-1825.34	-2649.22
			-403.411	-892.388	-1104.85	-1928.72
			-488.977	-701.434	-1525.31
			-212.457	-1036.33
			-823.874
MT#6 (1)			-261.817	-558.34	-796.286	-1276.33	-1669.59	-2384.63	-2877.76	-3462.53	-3985.13	-4111.9
			-296.523	-534.469	-1014.52	-1407.78	-2122.82	-2615.94	-3200.72	-3723.31	-3850.08
			-237.946	-717.994	-1111.25	-1826.29	-2319.42	-2904.19	-3426.79	-3553.56
			-480.048	-873.308	-1588.35	-2081.47	-2666.25	-3188.84	-3315.61
			-393.26	-1108.3	-1601.42	-2186.2	-2708.8	-2835.57
			-715.04	-1208.16	-1792.94	-2315.54	-2442.31
			-493.123	-1077.9	-1600.5	-1727.27
			-584.777	-1107.37	-1234.14
			-522.597	-649.367
			-126.77
MT#6 (2)			-171.714	-779.332	-1414.3	-2035.96	-2088.33	-1815.38	-2100.37	-2196.49
			-607.617	-1242.59	-1864.25	-1916.62	-1643.67	-1928.65	-2024.78
			-634.97	-1256.63	-1309	-1036.05	-1321.03	-1417.16
			-621.664	-674.031	-401.08	-686.064	-782.193
			-52.3671	220.584	-64.4002	-160.529
			272.951	-12.0331	-108.162
			-284.984	-381.113
			-96.1292
MT#6 (3)			-404.735	-1063.62	-1587.58	-2176.32
			-658.89	-1182.84	-1771.59
			-523.954	-1112.7
			-588.744
MT#6 (4)			-366.503	-1175.18	-1714.5	-2191.27
			-808.676	-1348	-1824.76
			-539.321	-1016.09
			-476.768
MT#7 (1)			-959.047	-1855.57	-2368.36	-2671.45
			-896.52	-1409.32	-1712.41
			-512.796	-815.885
			-303.089
MT#7 (2)			-947.862	-1261.88	-2040.19	-2493.07	-3179.97	-3722.3	-4555.76	-4854.2	-5247.73	-5907.65	-6285.12	-6718.04
			-314.021	-1092.33	-1545.21	-2232.11	-2774.44	-3607.9	-3906.34	-4299.87	-4959.79	-5337.26	-5770.17
			-778.305	-1231.19	-1918.09	-2460.42	-3293.88	-3592.32	-3985.85	-4645.76	-5023.24	-5456.15
			-452.884	-1139.79	-1682.12	-2515.57	-2814.01	-3207.55	-3867.46	-4244.93	-4677.85
			-686.903	-1229.23	-2062.69	-2361.13	-2754.66	-3414.58	-3792.05	-4224.97
			-542.33	-1375.79	-1674.23	-2067.76	-2727.67	-3105.15	-3538.06
			-833.455	-1131.9	-1525.43	-2185.34	-2562.82	-2995.73
			-298.441	-691.974	-1351.89	-1729.36	-2162.28
			-393.533	-1053.45	-1430.92	-1863.84
			-659.913	-1037.39	-1470.3
			-377.474	-810.389
			-432.915
MT#7 (3)			-278.333	-455.936	-944.863	-1112.34	-1431.34	-1277.91	-1536.96	-1906.64	-2217.23	-2232.52	-2492.24	-3052.62
			-177.603	-666.529	-834.012	-1153	-999.58	-1258.63	-1628.31	-1938.89	-1954.18	-2213.91	-2774.29
			-488.926	-656.409	-975.399	-821.977	-1081.03	-1450.7	-1761.29	-1776.58	-2036.3	-2596.68
			-167.482	-486.472	-333.05	-592.102	-961.777	-1272.37	-1287.65	-1547.38	-2107.76
			-318.99	-165.568	-424.62	-794.295	-1104.88	-1120.17	-1379.9	-1940.28
			153.422	-105.63	-475.304	-785.893	-801.182	-1060.9	-1621.29
			-259.052	-628.727	-939.315	-954.604	-1214.33	-1774.71
			-369.675	-680.263	-695.553	-955.275	-1515.66
			-310.588	-325.878	-585.6	-1145.98
			-15.2894	-275.012	-835.392
			-259.723	-820.103
			-560.38
MT#8 (2)			-473.396	-939.506	-1470.28	-2315.06	-2671.11	-3097.66	-3644.64	-3854.51	-4278.28	-4616.17	-5207.69	-5483.23	-5990.55
			-466.111	-996.883	-1841.66	-2197.72	-2624.27	-3171.25	-3381.12	-3804.88	-4142.77	-4734.29	-5009.83	-5517.15
			-530.772	-1375.55	-1731.61	-2158.15	-2705.14	-2915	-3338.77	-3676.66	-4268.18	-4543.72	-5051.04
			-844.781	-1200.84	-1627.38	-2174.36	-2384.23	-2808	-3145.89	-3737.41	-4012.95	-4520.27
			-356.055	-782.601	-1329.58	-1539.45	-1963.22	-2301.11	-2892.63	-3168.17	-3675.49
			-426.546	-973.528	-1183.4	-1607.16	-1945.05	-2536.57	-2812.11	-3319.43
			-546.982	-756.85	-1180.62	-1518.5	-2110.03	-2385.57	-2892.88
			-209.868	-633.634	-971.522	-1563.05	-1838.59	-2345.9
			-423.766	-761.655	-1353.18	-1628.72	-2136.03
			-337.888	-929.412	-1204.95	-1712.27
			-591.524	-867.064	-1374.38
			-275.541	-782.857
			-507.316
MT#8 (3)			-635	-1227.58	-1693.29	-1800.2	-2329.83	-2794.08	-3132.65	-3599.29	-4000.72	-4191.48	-4509.74	-4849.35	-5675.11	-6351.27	-7028.44	-7495.42	-7961.99	-8489.93	-8722.23	-9231.52
			-592.582	-1058.29	-1165.2	-1694.83	-2159.08	-2497.65	-2964.29	-3365.72	-3556.48	-3874.74	-4214.35	-5040.11	-5716.27	-6393.44	-6860.42	-7326.99	-7854.93	-8087.23	-8596.52
			-465.709	-572.62	-1102.25	-1566.5	-1905.07	-2371.71	-2773.14	-2963.9	-3282.16	-3621.77	-4447.53	-5123.69	-5800.86	-6267.84	-6734.41	-7262.35	-7494.65	-8003.94
			-106.911	-636.54	-1100.79	-1439.36	-1906	-2307.43	-2498.19	-2816.45	-3156.06	-3981.82	-4657.98	-5335.15	-5802.13	-6268.7	-6796.64	-7028.94	-7538.23
			-529.629	-993.878	-1332.45	-1799.09	-2200.52	-2391.28	-2709.54	-3049.15	-3874.91	-4551.07	-5228.24	-5695.22	-6161.79	-6689.73	-6922.03	-7431.32
			-464.249	-802.822	-1269.46	-1670.89	-1861.65	-2179.91	-2519.52	-3345.28	-4021.44	-4698.61	-5165.59	-5632.16	-6160.1	-6392.4	-6901.69
			-338.573	-805.207	-1206.64	-1397.4	-1715.66	-2055.27	-2881.03	-3557.19	-4234.36	-4701.34	-5167.91	-5695.85	-5928.15	-6437.44
			-466.634	-868.071	-1058.83	-1377.09	-1716.69	-2542.46	-3218.62	-3895.78	-4362.77	-4829.34	-5357.27	-5589.57	-6098.87
			-401.437	-592.193	-910.456	-1250.06	-2075.82	-2751.98	-3429.15	-3896.13	-4362.7	-4890.64	-5122.94	-5632.23
			-190.756	-509.019	-848.622	-1674.39	-2350.54	-3027.71	-3494.7	-3961.26	-4489.2	-4721.5	-5230.8
			-318.263	-657.866	-1483.63	-2159.79	-2836.96	-3303.94	-3770.51	-4298.45	-4530.75	-5040.04
			-339.603	-1165.37	-1841.53	-2518.69	-2985.68	-3452.25	-3980.18	-4212.48	-4721.78
			-825.764	-1501.92	-2179.09	-2646.07	-3112.64	-3640.58	-3872.88	-4382.17
			-676.159	-1353.33	-1820.31	-2286.88	-2814.82	-3047.12	-3556.41
			-677.169	-1144.15	-1610.72	-2138.66	-2370.96	-2880.25
			-466.983	-933.551	-1461.49	-1693.79	-2203.08
			-466.568	-994.507	-1226.81	-1736.1
			-527.939	-760.238	-1269.53
			-232.299	-741.592
			-509.293
MT#8 (4)			-742.124	-1250.53	-1547.53	-2159.1	-2796	-3029.58	-3494.81	-4193.62	-4637.24	-5063.35	-5652.93
			-508.407	-805.405	-1416.98	-2053.88	-2287.46	-2752.68	-3451.5	-3895.12	-4321.22	-4910.8
			-296.998	-908.573	-1545.47	-1779.05	-2244.28	-2943.09	-3386.71	-3812.81	-4402.4
			-611.575	-1248.47	-1482.05	-1947.28	-2646.09	-3089.71	-3515.82	-4105.4
			-636.898	-870.477	-1335.7	-2034.52	-2478.14	-2904.24	-3493.82
			-233.579	-698.806	-1397.62	-1841.24	-2267.34	-2856.92
			-465.227	-1164.04	-1607.66	-2033.76	-2623.35
			-698.811	-1142.43	-1568.54	-2158.12
			-443.62	-869.726	-1459.31
			-426.107	-1015.69
			-589.581
MT#8 (5)			-769.326	-1379.86	-1867.03
			-610.536	-1097.71
			-487.171
MT#9 (1)			-130.909	-447.644	679.358	1270.4	1799.49
			-316.735	810.267	1401.31	1930.4
			1127	1718.04	2247.13
			591.038	1120.13
			529.092
MT#9 (2)			-508	-1143.19	-1736.23	-1990.72	-2688.29	-2948.37	-3683.55
			-635.194	-1228.23	-1482.72	-2180.29	-2440.37	-3175.55
			-593.033	-847.528	-1545.1	-1805.18	-2540.35
			-254.495	-952.064	-1212.14	-1947.32
			-697.57	-957.648	-1692.83
			-260.078	-995.256
			-735.178
MT#9 (3)			-154.038	-232.791	-149.575	-195.138	-318.208	-508.443	-571.5	-486.791	-553.943	-592.582	-529.082	-577.744	-529.507	-719.582	-677.291	-719.894	-575.017	-529.082	-573.072	-532.879	-613.791	-678.618	-698.822	-636.407	-551.923	-571.893	-550.7	-551.923	-741.095	-785.652	-1143.79	-1079.71	-1123.59
			-78.7535	4.46238	-41.1003	-164.17	-354.405	-417.462	-332.753	-399.905	-438.544	-375.044	-423.706	-375.469	-565.544	-523.253	-565.857	-420.979	-375.044	-419.034	-378.841	-459.753	-524.58	-544.784	-482.369	-397.886	-417.856	-396.662	-397.886	-587.057	-631.615	-989.749	-925.671	-969.549
			83.2158	37.6532	-85.4166	-275.652	-338.709	-254	-321.152	-359.791	-296.291	-344.953	-296.716	-486.791	-444.5	-487.103	-342.226	-296.291	-340.281	-300.088	-381	-445.827	-466.031	-403.616	-319.132	-339.102	-317.909	-319.132	-508.304	-552.861	-910.996	-846.917	-890.796
			-45.5627	-168.632	-358.867	-421.925	-337.216	-404.367	-443.007	-379.507	-428.169	-379.932	-570.007	-527.716	-570.319	-425.442	-379.507	-423.497	-383.304	-464.216	-529.043	-549.247	-486.832	-402.348	-422.318	-401.124	-402.348	-741.095	-636.077	-994.212	-930.133	-974.012
			-123.07	-313.305	-376.362	-291.653	-358.805	-397.444	-333.944	-382.606	-334.369	-524.444	-482.153	-524.757	-379.879	-333.944	-377.934	-337.741	-418.653	-483.48	-503.684	-441.269	-356.786	-376.756	-355.562	-356.786	-545.957	-631.615	-948.649	-884.57	-928.449
			-190.235	-253.292	-168.583	-235.735	-274.374	-210.874	-259.536	-211.299	-401.374	-359.083	-401.687	-256.809	-210.874	-254.864	-214.671	-295.583	-360.41	-380.614	-318.199	-233.716	-253.686	-232.492	-233.716	-422.887	-467.445	-910.996	-761.501	-805.379
			-63.0575	21.6515	-45.5001	-84.1395	-20.6395	-69.3012	-21.0644	-211.139	-168.848	-211.452	-66.5744	-20.6395	-64.6295	-24.4364	-105.348	-170.175	-190.379	-127.964	-43.4809	-63.4509	-42.257	-43.4809	-232.652	-277.21	-635.344	-930.133	-615.144
			84.709	17.5574	-21.082	42.418	-6.24377	41.9931	-148.082	-105.791	-148.394	-3.51696	42.418	-1.57202	38.621	-42.291	-107.118	-127.322	-64.9067	19.5766	-0.393409	20.8004	19.5766	-169.595	-214.152	-572.287	-508.208	-928.449
			-67.1516	-105.791	-42.291	-90.9528	-42.7159	-232.791	-190.5	-233.103	-88.226	-42.291	-86.281	-46.088	-127	-191.827	-212.031	-149.616	-65.1324	-85.1024	-63.9086	-65.1324	-254.304	-298.861	-656.996	-592.917	-636.796
			-38.6394	24.8606	-23.8011	24.4357	-165.639	-123.348	-165.952	-21.0743	24.8606	-19.1294	21.0636	-59.8484	-124.675	-144.879	-82.4641	2.0192	-17.9508	3.24307	2.0192	-187.152	-231.71	-589.844	-525.766	-569.644
			63.5	14.8382	63.0751	-127	-84.709	-127.312	17.565	63.5	19.51	59.703	-21.209	-86.036	-106.24	-43.8247	40.6586	20.6886	41.8824	40.6586	-148.513	-193.07	-551.205	-487.126	-531.005
			-48.6618	-0.424926	-190.5	-148.209	-190.812	-45.935	0	-43.99	-3.79699	-84.709	-149.536	-169.74	-107.325	-22.8414	-42.8114	-21.6176	-22.8414	-212.013	-256.57	-614.705	-550.626	-594.505
			48.2368	-141.838	-99.5472	-142.151	2.72681	48.6618	4.67175	44.8648	-36.0472	-100.874	-121.078	-58.663	25.8203	5.85036	27.0442	25.8203	-163.351	-207.909	-566.043	-501.965	-545.843
			-190.075	-147.784	-190.388	-45.51	0.424926	-43.5651	-3.37206	-84.2841	-149.111	-169.315	-106.9	-22.4165	-42.3865	-21.1926	-22.4165	-211.588	-256.145	-614.28	-550.201	-594.08
			42.291	-0.31249	144.565	190.5	146.51	186.703	105.791	40.964	20.7601	83.1753	167.659	147.689	168.882	167.659	-21.5125	-66.0704	-424.205	-360.126	-404.005
			-42.6035	102.274	148.209	104.219	144.412	63.5	-1.327	-21.5309	40.8843	125.368	105.398	126.591	125.368	-63.8035	-108.361	-466.496	-402.417	-446.296
			144.878	190.812	146.822	187.016	106.103	41.2765	21.0726	83.4878	167.971	148.001	169.195	167.971	-21.2001	-65.7579	-423.892	-359.814	-403.692
			45.935	1.94494	42.138	-38.774	-103.601	-123.805	-61.3898	23.0935	3.12355	24.3174	23.0935	-166.078	-210.635	-568.77	-504.691	-548.57
			-43.99	-3.79699	-84.709	-149.536	-169.74	-107.325	-22.8414	-42.8114	-21.6176	-22.8414	-212.013	-256.57	-614.705	-550.626	-594.505
			40.193	-40.719	-105.546	-125.75	-63.3347	21.1486	1.17861	22.3725	21.1486	-168.023	-212.58	-570.715	-506.636	-550.515
			-80.912	-145.739	-165.943	-103.528	-19.0444	-39.0144	-17.8206	-19.0444	-208.216	-252.773	-610.908	-546.829	-590.708
			-64.827	-85.0309	-22.6157	61.8676	41.8976	63.0914	61.8676	-127.304	-171.861	-529.996	-465.917	-509.796
			-20.2039	42.2113	126.695	106.725	127.918	126.695	-62.4766	-107.034	-465.169	-401.09	-444.969
			62.4152	146.898	126.929	148.122	146.898	-42.2726	-86.8305	-444.965	-380.886	-424.765
			84.4833	64.5133	85.7072	84.4833	-104.688	-149.246	-507.38	-443.302	-487.18
			-19.97	1.22387	0	-189.171	-233.729	-591.863	-527.785	-571.663
			21.1938	19.97	-169.201	-213.759	-571.893	-507.815	-551.693
			-1.22387	-190.395	-234.953	-593.087	-529.009	-572.887
			-189.171	-233.729	-591.863	-527.785	-571.663
			-44.5578	-402.692	-338.614	-382.492
			-358.134	-294.056	-337.934
			64.0785	20.2
			-43.8785
MT#9 (4)			-488.625	-762.295	-1399.57	-1629.93	-2181.01	-2836.37	-3069.74	-3514.6	-3874.94	-4423.99	-4953
			-273.67	-910.941	-1141.3	-1692.38	-2347.75	-2581.11	-3025.98	-3386.32	-3935.37	-4464.38
			-637.271	-867.634	-1418.71	-2074.08	-2307.44	-2752.31	-3112.65	-3661.7	-4190.7
			-230.363	-781.441	-1436.8	-1670.17	-2115.04	-2475.38	-3024.43	-3553.43
			-551.078	-1206.44	-1439.81	-1884.67	-2245.02	-2794.06	-3323.07
			-655.364	-888.732	-1333.6	-1693.94	-2242.99	-2771.99
			-233.369	-678.233	-1038.57	-1587.62	-2116.63
			-444.864	-805.206	-1354.25	-1883.26
			-360.341	-909.39	-1438.4
			-549.049	-1078.06
			-529.007
MT#9 (5)			-465.709	-741.095	-1248.79	-1672.75	-2054.19
			-275.386	-783.082	-1207.04	-1588.48
			-507.696	-931.652	-1313.1
			-423.956	-805.4
			-381.444
MT#9 (6)			59.8984	63.5	84.709	-113.931	-174.493	-63.5	-154.003	-89.8026
			3.60162	24.8106	-173.829	-234.392	-123.398	-213.901	-149.701
			21.209	-177.431	-237.993	-127	-217.503	-153.303
			-198.64	-259.202	-148.209	-238.712	-174.512
			-60.5625	50.431	-40.0717	24.1284
			110.993	20.4908	84.6909
			-90.5026	-26.3026
			64.2001
MT#10 (1)			63.5	76.3645	84.709	42.418	59.9881	-149.575	-275.082	-445.006	-677.623	-848.96	-1545.66	-1504.13	-2201.39	-2478.76	-3093.84	-3413.11	-3580.15	-3731.3	-4107.66	-4259.76	-4659.66	-5168.09	-5339.08	-5301.1	-5742.68	-5894.03	-6188.73	-6399.16
			12.8645	21.209	-21.082	-3.51189	-213.075	-338.582	-508.506	-741.123	-912.46	-1609.16	-1567.63	-2264.89	-2542.26	-3157.34	-3476.61	-3643.65	-3794.8	-4171.16	-4323.26	-4723.16	-5231.59	-5402.58	-5364.6	-5806.18	-5957.53	-6252.23	-6462.66
			8.3445	-33.9465	-16.3764	-225.94	-351.446	-521.37	-753.987	-925.325	-1622.03	-1580.5	-2277.76	-2555.13	-3170.21	-3489.48	-3656.52	-3807.67	-4184.02	-4336.13	-4736.03	-5244.46	-5415.45	-5377.46	-5819.04	-5970.4	-6265.1	-6475.52
			-42.291	-24.7209	-234.284	-359.791	-529.715	-762.332	-933.669	-1630.37	-1588.84	-2286.1	-2563.47	-3178.55	-3497.82	-3664.86	-3816.01	-4192.37	-4344.47	-4744.37	-5252.8	-5423.79	-5385.81	-5827.39	-5978.74	-6273.44	-6483.87
			17.5701	-191.993	-317.5	-487.424	-720.041	-891.378	-1588.08	-1546.55	-2243.81	-2521.18	-3136.26	-3455.53	-3622.57	-3773.72	-4150.07	-4302.18	-4702.08	-5210.51	-5381.5	-5343.52	-5785.1	-5936.45	-6231.15	-6441.58
			-209.563	-335.07	-504.994	-737.611	-908.948	-1605.65	-1564.12	-2261.38	-2538.75	-3153.83	-3473.1	-3640.14	-3791.29	-4167.64	-4319.75	-4719.65	-5228.08	-5399.07	-5361.09	-5802.67	-5954.02	-6248.72	-6459.15
			-125.507	-295.431	-528.048	-699.385	-1396.09	-1354.56	-2051.82	-2329.19	-2944.27	-3263.54	-3430.58	-3581.73	-3958.08	-4110.19	-4510.09	-5018.52	-5189.51	-5151.52	-5593.11	-5744.46	-6039.16	-6249.58
			-169.924	-402.541	-573.878	-1270.58	-1229.05	-1926.31	-2203.68	-2818.76	-3138.03	-3305.07	-3456.22	-3832.57	-3984.68	-4384.58	-4893.01	-5064	-5026.02	-5467.6	-5618.95	-5913.65	-6124.08
			-232.617	-403.954	-1100.66	-1059.13	-1756.39	-2033.76	-2648.84	-2968.11	-3135.15	-3286.3	-3662.65	-3814.76	-4214.66	-4723.09	-4894.08	-4856.09	-5297.67	-5449.03	-5743.73	-5954.15
			-171.337	-868.041	-826.509	-1523.77	-1801.14	-2416.22	-2735.49	-2902.53	-3053.68	-3430.03	-3582.14	-3982.04	-4490.47	-4661.46	-4623.48	-5065.06	-5216.41	-5511.11	-5721.54
			-696.704	-655.172	-1352.43	-1629.8	-2244.88	-2564.15	-2731.19	-2882.34	-3258.7	-3410.8	-3810.7	-4319.13	-4490.12	-4452.14	-4893.72	-5045.07	-5339.77	-5550.2
			41.5322	-655.729	-933.1	-1548.18	-1867.45	-2034.49	-2185.64	-2561.99	-2714.1	-3114	-3622.43	-3793.42	-3755.43	-4197.02	-4348.37	-4643.07	-4853.5
			-697.261	-974.632	-1589.71	-1908.98	-2076.02	-2227.17	-2603.52	-2755.63	-3155.53	-3663.96	-3834.95	-3796.97	-4238.55	-4389.9	-4684.6	-4895.03
			-277.371	-892.45	-1211.72	-1378.76	-1529.91	-1906.26	-2058.37	-2458.27	-2966.7	-3137.69	-3099.71	-3541.29	-3692.64	-3987.34	-4197.77
			-615.079	-934.347	-1101.39	-1252.54	-1628.89	-1781	-2180.9	-2689.33	-2860.32	-2822.33	-3263.92	-3415.27	-3709.97	-3920.4
			-319.268	-486.308	-637.459	-1013.81	-1165.92	-1565.82	-2074.25	-2245.24	-2207.26	-2648.84	-2800.19	-3094.89	-3305.32
			-167.04	-318.19	-694.545	-846.653	-1246.55	-1754.98	-1925.97	-1887.99	-2329.57	-2480.92	-2775.62	-2986.05
			-151.151	-527.506	-679.613	-1079.51	-1587.94	-1758.93	-1720.95	-2162.53	-2313.88	-2608.58	-2819.01
			-376.355	-528.462	-928.361	-1436.79	-1607.78	-1569.8	-2011.38	-2162.73	-2457.43	-2667.86
			-152.107	-552.006	-1060.44	-1231.43	-1193.44	-1635.02	-1786.37	-2081.07	-2291.5
			-399.899	-908.33	-1079.32	-1041.33	-1482.92	-1634.27	-1928.97	-2139.4
			-508.431	-679.42	-641.436	-1083.02	-1234.37	-1529.07	-1739.5
			-170.989	-133.004	-574.586	-725.937	-1020.64	-1231.07
			37.9844	-403.597	-554.948	-849.649	-1060.08
			-441.582	-592.933	-887.633	-1098.06
			-151.351	-446.051	-656.48
			-294.7	-505.129
			-210.428
MT#10 (2)			66.9082	170.614	-169.418	-308.249	-365.477	-21.209	66.9483	-189.415	-191.663	-261.817	-299.438	-189.358	-212.769	-241.419	-278.459	-362.409	-402.761	-552.04	-467.625	-573.063	-511.953	-318.199	-573.063	-423.943	-635.35	-575.017	-829.822	-722.505	-593.088	-763.173	-594.216	-698.5	-508.437	-465.709	-445.006	-404.426	-494.231	-467.625	-445.006	-123.494	-114.096	128.738	191.663	-254.873	-446.507	-236.749	-339.364
			103.706	-236.326	-375.158	-432.385	-88.1172	0.0401248	-256.323	-258.571	-328.725	-366.346	-256.266	-279.677	-308.327	-345.367	-429.317	-469.669	-618.948	-534.533	-639.971	-578.862	-385.107	-639.971	-490.851	-702.258	-641.925	-896.73	-789.413	-659.996	-830.081	-661.124	-765.408	-575.345	-532.617	-511.914	-471.334	-561.14	-534.533	-511.914	-190.403	-181.004	61.8298	124.755	-321.782	-513.415	-303.657	-406.273	-513.415
			-340.032	-478.864	-536.091	-191.823	-103.666	-360.029	-362.277	-432.432	-470.052	-359.973	-383.383	-412.033	-449.073	-533.023	-573.376	-722.655	-638.24	-743.677	-682.568	-488.814	-743.677	-594.557	-805.964	-745.631	-1000.44	-893.119	-763.703	-933.787	-764.83	-869.114	-679.052	-636.323	-615.62	-575.041	-664.846	-638.24	-615.62	-294.109	-284.71	-41.8765	21.0486	-425.488	-617.122	-407.363	-509.979	-617.122	-805.964
			-138.831	-196.059	148.209	236.366	-19.9971	-22.245	-92.3992	-130.02	-19.9403	-43.3507	-72.0008	-109.041	-192.991	-233.343	-382.622	-298.207	-403.645	-342.535	-148.781	-403.645	-254.525	-465.932	-405.599	-660.404	-553.087	-593.088	-593.755	-424.798	-529.082	-339.019	-296.291	-275.588	-235.008	-324.813	-298.207	-275.588	45.9236	55.3219	298.156	361.081	-85.4554	-277.089	-67.331	-169.946	-277.089	-465.932	-361.488
			-57.2272	287.04	375.198	118.834	116.586	46.4323	8.81182	118.891	95.4808	66.8307	29.7907	-54.1595	-94.5116	-243.791	-159.376	-264.813	-203.704	-9.94967	-264.813	-115.693	-327.1	-266.767	-521.572	-414.255	-284.839	-830.081	-285.966	-390.251	-200.188	-157.46	-136.756	-96.1768	-185.982	-159.376	-136.756	184.755	194.153	436.987	499.912	53.3761	-138.258	71.5005	-31.115	-138.258	-327.1	-222.657	-474.96
			344.268	432.425	176.062	173.814	103.659	66.039	176.118	152.708	124.058	87.0179	3.06774	-37.2844	-186.564	-102.149	-207.586	-146.477	47.2775	-207.586	-58.4658	-269.873	-209.54	-464.345	-357.028	-227.612	-397.696	-764.83	-333.023	-142.961	-100.232	-79.529	-38.9496	-128.755	-102.149	-79.529	241.982	251.381	494.215	557.14	110.603	-81.0306	128.728	26.1122	-81.0306	-269.873	-165.43	-417.732	-359.185
			88.1573	-168.206	-170.454	-240.608	-278.229	-168.149	-191.56	-220.21	-257.25	-341.2	-381.552	-530.831	-446.416	-551.854	-490.744	-296.99	-551.854	-402.734	-614.141	-553.808	-808.613	-701.296	-571.879	-741.964	-573.007	-529.082	-487.228	-444.5	-423.797	-383.217	-473.022	-446.416	-423.797	-102.285	-92.8871	149.947	212.872	-233.664	-425.298	-215.54	-318.155	-425.298	-614.141	-509.697	-762	-703.453	-741.964
			-256.363	-258.611	-328.765	-366.386	-256.307	-279.717	-308.367	-345.407	-429.357	-469.709	-618.989	-534.574	-640.011	-578.902	-385.147	-640.011	-490.891	-702.298	-641.965	-896.77	-789.453	-660.037	-830.121	-661.164	-765.448	-200.188	-532.657	-511.954	-471.375	-561.18	-534.574	-511.954	-190.443	-181.044	61.7896	124.715	-321.822	-513.456	-303.697	-406.313	-513.456	-702.298	-597.855	-850.157	-791.61	-830.121	-923.129
			-2.24791	-72.4021	-110.023	0.0567621	-23.3536	-52.0037	-89.0437	-172.994	-213.346	-362.625	-278.21	-383.648	-322.538	-128.784	-383.648	-234.527	-445.935	-385.602	-640.407	-533.09	-403.673	-573.758	-404.801	-509.085	-319.022	-100.232	-255.591	-215.011	-304.816	-278.21	-255.591	65.9207	75.319	318.153	381.078	-65.4583	-257.092	-47.3339	-149.949	-257.092	-445.935	-341.491	-593.794	-535.247	-573.758	-666.765	-729.611
			-70.1542	-107.775	2.30467	-21.1057	-49.7558	-86.7958	-170.746	-211.098	-360.377	-275.962	-381.4	-320.29	-126.536	-381.4	-232.28	-443.687	-383.354	-638.159	-530.842	-401.425	-571.51	-402.553	-506.837	-316.774	-274.046	-423.797	-212.763	-302.568	-275.962	-253.343	68.1686	77.5669	320.401	383.326	-63.2104	-254.844	-45.086	-147.701	-254.844	-443.687	-339.243	-591.546	-532.999	-571.51	-664.518	-727.363	-594.116
			-37.6205	72.4589	49.0485	20.3984	-16.6416	-100.592	-140.944	-290.223	-205.808	-311.245	-250.136	-56.3819	-311.245	-162.125	-373.533	-313.2	-568.005	-460.688	-331.271	-501.355	-332.399	-436.683	-246.62	-203.892	-183.188	-471.375	-232.414	-205.808	-183.188	138.323	147.721	390.555	453.48	6.94381	-184.69	25.0682	-77.5473	-184.69	-373.533	-269.089	-521.392	-462.845	-501.355	-594.363	-657.209	-523.962	-50.702
			110.079	86.669	58.0189	20.9789	-62.9713	-103.323	-252.603	-168.188	-273.625	-212.516	-18.7615	-273.625	-124.505	-335.912	-275.579	-530.384	-423.067	-293.651	-463.735	-294.778	-399.062	-209	-166.271	-145.568	-104.989	-304.816	-168.188	-145.568	175.943	185.342	428.176	491.101	44.5643	-147.07	62.6887	-39.9268	-147.07	-335.912	-231.469	-483.771	-425.224	-463.735	-556.743	-619.589	-486.341	-13.0816	170.7
			-23.4104	-52.0605	-89.1004	-173.051	-213.403	-362.682	-278.267	-383.704	-322.595	-128.841	-383.704	-234.584	-445.992	-385.659	-640.464	-533.147	-403.73	-573.814	-404.858	-509.142	-319.079	-276.351	-255.647	-215.068	-304.873	-275.962	-255.647	65.8639	75.2623	318.096	381.021	-65.5151	-257.149	-47.3907	-150.006	-257.149	-445.992	-341.548	-593.851	-535.304	-573.814	-666.822	-729.668	-596.421	-123.161	60.6204	-191.642
			-28.6501	-65.6901	-149.64	-189.992	-339.272	-254.857	-360.294	-299.185	-105.43	-360.294	-211.174	-422.581	-362.248	-617.053	-509.736	-380.32	-550.404	-381.447	-485.731	-295.669	-252.94	-232.237	-191.658	-281.463	-254.857	-183.188	89.2743	98.6727	341.507	404.432	-42.1047	-233.739	-23.9803	-126.596	-233.739	-422.581	-318.138	-570.44	-511.893	-550.404	-643.412	-706.258	-573.01	-99.7505	84.0308	-168.231	98.7198
			-37.0399	-120.99	-161.342	-310.621	-226.206	-331.644	-270.535	-76.7803	-331.644	-182.524	-393.931	-333.598	-588.403	-481.086	-351.67	-521.754	-352.797	-457.081	-267.018	-224.29	-203.587	-163.007	-252.813	-226.206	-203.587	175.943	127.323	370.157	433.082	-13.4546	-205.088	4.66983	-97.9456	-205.088	-393.931	-289.487	-541.79	-483.243	-521.754	-614.762	-677.608	-544.36	-71.1004	112.681	-139.581	127.37
			-83.9502	-124.302	-273.582	-189.167	-294.604	-233.495	-39.7404	-294.604	-145.484	-356.891	-296.558	-551.363	-444.046	-314.63	-484.714	-315.757	-420.041	-229.979	-187.25	-166.547	-125.968	-215.773	-189.167	-166.547	154.964	75.2623	407.197	470.122	23.5854	-168.049	41.7098	-60.9057	-168.049	-356.891	-252.447	-504.75	-446.203	-484.714	-577.722	-640.568	-507.32	-34.0605	149.721	-102.541	164.41
			-40.3522	-189.631	-105.216	-210.654	-149.544	44.2098	-210.654	-61.5336	-272.941	-212.608	-467.413	-360.096	-230.679	-400.764	-231.807	-336.091	-146.028	-103.3	-82.5967	-42.0173	-131.823	-105.216	-82.5967	238.915	248.313	341.507	554.072	107.536	-84.0984	125.66	23.0445	-84.0984	-272.941	-168.497	-420.8	-362.253	-400.764	-493.772	-556.617	-423.37	49.8897	233.671	-18.591	248.36
			-149.279	-64.8641	-170.301	-109.192	84.562	-170.301	-21.1814	-232.589	-172.256	-427.061	-319.744	-190.327	-360.412	-191.455	-295.739	-105.676	-62.9479	-42.2446	-1.66514	-91.4703	-64.8641	-42.2446	279.267	288.665	531.499	433.082	147.888	-43.7462	166.012	63.3967	-43.7462	-232.589	-128.145	-380.448	-321.901	-360.412	-453.419	-516.265	-383.018	90.2419	274.023	21.7611	288.712
			84.415	-21.0223	40.0869	233.841	-21.0223	128.098	-83.3096	-22.9766	-277.782	-170.465	-41.048	-211.132	-42.1755	-146.46	43.603	86.3313	107.035	147.614	57.8088	84.415	107.035	428.546	437.944	680.778	743.703	23.5854	105.533	315.291	212.676	105.533	-83.3096	21.1341	-231.169	-172.622	-211.132	-304.14	-366.986	-233.739	239.521	423.302	171.04	437.991
			-105.437	-44.3281	149.426	-105.437	43.6828	-167.725	-107.392	-362.197	-254.88	-125.463	-295.547	-126.591	-230.875	-40.812	1.91628	22.6196	63.199	-26.6062	0	22.6196	344.131	353.529	596.363	659.288	212.752	-84.0984	230.876	128.261	21.118	-167.725	-63.281	-315.584	-257.037	-295.547	-388.555	-451.401	-318.154	155.106	338.887	86.6253	353.576
			61.1093	254.863	0	149.12	-62.2872	-1.95433	-256.759	-149.442	-20.0257	-190.11	-21.1532	-125.437	64.6254	107.354	128.057	168.636	78.8312	105.437	128.057	449.568	458.967	701.801	764.726	318.189	126.555	166.012	233.698	126.555	-62.2872	42.1564	-210.146	-151.599	-190.11	-283.118	-345.964	-212.716	260.543	444.325	192.063	459.014
			193.754	-61.1093	88.0109	-123.396	-63.0636	-317.869	-210.552	-81.135	-251.219	-82.2625	-186.547	3.5161	46.2444	66.9477	107.527	17.7219	44.3281	66.9477	388.459	397.857	640.691	703.616	257.08	65.4461	275.204	212.676	65.4461	-123.396	-18.9529	-271.256	-212.709	-251.219	-344.227	-407.073	-273.826	199.434	383.215	130.953	397.904
			-254.863	-105.743	-317.151	-256.818	-511.623	-404.306	-274.889	-444.974	-276.017	-380.301	-190.238	-147.51	-126.807	-86.2271	-176.032	-149.426	-126.807	194.705	204.103	446.937	509.862	63.3258	-128.308	81.4502	-21.1653	21.118	-317.151	-212.707	-465.01	-406.463	-444.974	-537.981	-600.827	-467.58	5.67992	189.461	-62.8008	204.15
			149.12	-62.2872	-1.95433	-256.759	-149.442	-20.0257	-190.11	-21.1532	-125.437	64.6254	107.354	128.057	168.636	78.8312	105.437	128.057	449.568	458.967	701.801	764.726	318.189	126.555	336.314	233.698	126.555	-62.2872	42.1564	-210.146	-151.599	-190.11	-283.118	-345.964	-212.716	260.543	444.325	192.063	459.014
			-211.407	-151.074	-405.879	-298.562	-169.146	-339.23	-170.273	-274.557	-84.4948	-41.7665	-21.0632	19.5162	-70.289	-43.6828	-21.0632	300.448	309.846	552.68	615.605	169.069	-22.5648	187.194	84.5781	-22.5648	-211.407	-18.9529	-359.266	-300.72	-339.23	-432.238	-495.084	-361.836	111.423	295.205	42.9425	309.894
			60.3329	-194.472	-87.155	42.2615	-127.823	41.134	-63.1501	126.913	169.641	190.344	230.924	141.118	167.725	190.344	511.855	521.254	764.088	827.013	380.476	188.843	398.601	295.985	188.843	0	104.444	-465.01	-89.3122	-127.823	-220.831	-283.676	-150.429	322.831	506.612	254.35	521.301
			-254.805	-147.488	-18.0714	-188.156	-19.1989	-123.483	66.5797	109.308	130.011	170.591	80.7855	107.392	130.011	451.523	460.921	703.755	766.68	320.144	128.51	338.268	235.652	128.51	-60.3329	44.1107	-208.192	-151.599	-188.156	-281.164	-344.009	-210.762	262.498	446.279	194.017	460.968
			107.317	236.734	66.6492	235.606	131.322	321.385	364.113	384.816	425.396	335.59	362.197	384.816	706.327	715.726	958.56	1021.48	574.948	383.315	593.073	490.457	383.315	194.472	298.916	46.6129	105.16	-339.23	-26.3587	-89.2045	44.0429	517.303	701.084	448.822	715.773
			129.417	-40.6678	128.289	24.0049	214.068	256.796	277.499	318.079	228.273	254.88	277.499	599.01	608.409	851.243	914.168	467.631	275.998	485.756	383.14	275.998	87.155	191.599	-60.7041	-2.15722	-40.6678	-220.831	-196.521	-63.2741	409.986	593.767	341.505	608.456
			-170.084	-1.12752	-105.412	84.6511	127.379	148.083	188.662	98.8569	125.463	148.083	469.594	478.992	721.826	784.751	338.215	146.581	356.339	253.724	146.581	-42.2615	62.1821	-190.121	-131.574	-170.084	-263.092	-344.009	-192.691	280.569	464.35	212.088	479.039
			168.957	64.6727	254.735	297.464	318.167	358.746	268.941	295.547	318.167	639.678	649.077	891.911	954.836	508.299	316.665	526.424	423.808	316.665	127.823	232.266	-20.0363	38.5106	0	-93.0079	-155.854	44.0429	450.653	634.435	382.173	649.124
			-104.284	85.7786	128.507	149.21	189.79	99.9844	126.591	149.21	470.721	480.12	722.954	785.879	339.342	147.709	357.467	254.851	147.709	-41.134	63.3096	-188.993	-130.446	-168.957	-261.965	-324.81	-191.563	409.986	465.478	213.216	480.167
			190.063	232.791	253.494	294.074	204.269	230.875	253.494	575.006	584.404	827.238	890.163	443.627	251.993	461.751	359.136	251.993	63.1501	167.594	-84.709	-26.1621	-64.6727	-157.681	-220.526	-87.279	385.981	464.35	317.5	584.451
			42.7283	63.4316	104.011	14.2058	40.812	63.4316	384.943	394.341	637.175	700.1	253.564	61.93	271.688	169.073	61.93	-126.913	-22.469	-274.772	-216.225	-254.735	-347.743	-410.589	-277.342	195.918	379.699	382.173	394.388
			20.7033	61.2827	-28.5225	-1.91628	20.7033	342.215	351.613	594.447	657.372	210.836	19.2017	228.96	126.345	19.2017	-169.641	-65.1973	-317.5	-258.953	-297.464	-390.472	-453.317	-320.07	153.19	336.971	84.709	480.167
			40.5794	-49.2258	-22.6196	0	321.511	330.91	573.744	636.669	190.132	-1.50161	208.257	105.641	-1.50161	-190.344	-85.9006	-338.203	-279.656	-318.167	-411.175	-474.021	-340.773	132.486	316.268	64.0057	330.957
			-89.8052	-63.199	-40.5794	280.932	290.33	533.164	596.089	149.553	-42.081	167.677	65.0618	-42.081	-230.924	-126.48	-378.783	-320.236	-358.746	-451.754	-514.6	-381.353	91.907	275.688	23.4263	290.377
			26.6062	49.2258	370.737	380.135	622.969	685.894	239.358	47.7242	257.482	154.867	47.7242	-141.118	-36.6748	-288.978	-230.431	-268.941	-361.949	-424.795	-291.547	181.712	365.494	113.231	380.183
			22.6196	344.131	353.529	596.363	659.288	212.752	21.118	230.876	128.261	21.118	-167.725	-63.281	-315.584	-257.037	-295.547	-388.555	-451.401	-318.154	155.106	338.887	86.6253	353.576
			321.511	330.91	573.744	636.669	190.132	-1.50161	208.257	105.641	-1.50161	-190.344	-85.9006	-338.203	-279.656	-318.167	-411.175	-474.021	-340.773	132.486	316.268	64.0057	330.957
			9.39837	252.232	315.157	-131.379	-323.013	-113.255	-215.87	-323.013	-511.855	-407.412	-659.715	-601.168	-639.678	-732.686	-795.532	-662.285	-189.025	-5.24349	-257.506	9.44552
			242.834	305.759	-140.777	-332.411	-122.653	-225.268	-332.411	-521.254	-416.81	-669.113	-610.566	-649.077	-742.084	-804.93	-671.683	-198.423	-14.6419	-266.904	0.0471544
			62.9251	-383.611	-575.245	-365.487	-468.102	-575.245	-764.088	-659.644	-911.947	-853.4	-891.911	-984.918	-1047.76	-914.517	-441.257	-257.476	-509.738	-242.787
			-446.536	-638.17	-428.412	-531.027	-638.17	-827.013	-722.569	-974.872	-916.325	-954.836	-1047.84	-1110.69	-977.442	-504.182	-320.401	-572.663	-305.712
			-191.634	18.1244	-84.4911	-191.634	-380.476	-276.033	-528.336	-469.789	-508.299	-601.307	-664.153	-530.906	-57.6458	126.135	-126.127	140.825
			209.758	107.143	0	-188.843	-84.3989	-336.702	-278.155	-316.665	-409.673	-472.519	-339.272	133.988	317.769	65.5073	332.458
			-102.615	-209.758	-398.601	-294.157	-546.46	-487.913	-526.424	-619.432	-682.277	-549.03	-75.7703	108.011	-144.251	122.7
			-107.143	-295.985	-191.542	-443.845	-385.298	-423.808	-516.816	-579.662	-446.415	26.8452	210.627	-41.6355	225.316
			-188.843	-84.3989	-336.702	-278.155	-316.665	-409.673	-472.519	-339.272	133.988	317.769	65.5073	332.458
			104.444	-147.859	-89.3122	-127.823	-220.831	-283.676	-150.429	322.831	506.612	254.35	521.301
			-252.303	-193.756	-232.266	-325.274	-388.12	-254.873	218.387	402.168	149.906	416.857
			58.5469	20.0363	-72.9715	-135.817	-2.56997	470.69	654.471	402.209	669.16
			-38.5106	-131.518	-194.364	-61.1169	412.143	595.924	343.662	610.613
			-93.0079	-155.854	-22.6063	450.653	634.435	382.173	649.124
			-62.8458	70.4016	543.661	727.443	475.181	742.132
			133.247	606.507	790.288	538.026	804.977
			473.26	657.041	404.779	671.73
			183.781	-68.4808	198.47
			-252.262	14.689
			266.951
MT#10 (3)			-299.42	-638.167	-1144.76	-1633.35	-2417.55	-3412.12	-4321.32	-5168.22	-5618.19	-6042	-6273.46	-6421.35	-6106.61	-5999.78	-5853.07	-6063.18	-6292.52
			-338.747	-845.343	-1333.93	-2118.13	-3112.7	-4021.9	-4868.8	-5318.77	-5742.58	-5974.04	-6121.93	-5807.19	-5700.36	-5553.65	-5763.76	-5993.1
			-506.595	-995.181	-1779.38	-2773.95	-3683.15	-4530.05	-4980.02	-5403.83	-5635.29	-5783.19	-5468.44	-5361.61	-5214.9	-5425.01	-5654.35
			-488.585	-1272.78	-2267.36	-3176.55	-4023.46	-4473.43	-4897.24	-5128.69	-5276.59	-4961.85	-4855.01	-4708.31	-4918.41	-5147.76
			-784.2	-1778.77	-2687.97	-3534.87	-3984.84	-4408.65	-4640.11	-4788.01	-4473.26	-4366.43	-4219.72	-4429.83	-4659.17
			-994.573	-1903.77	-2750.67	-3200.64	-3624.45	-3855.91	-4003.81	-3689.06	-3582.23	-3435.52	-3645.63	-3874.97
			-909.197	-1756.1	-2206.07	-2629.88	-2861.34	-3009.23	-2694.49	-2587.66	-2440.95	-2651.06	-2880.4
			-846.904	-1296.87	-1720.68	-1952.14	-2100.04	-1785.29	-1678.46	-1531.75	-1741.86	-1971.2
			-449.966	-873.78	-1105.24	-1253.13	-938.387	-831.556	-684.848	-894.956	-1124.3
			-423.814	-655.27	-803.167	-488.421	-381.59	-234.881	-444.989	-674.334
			-231.456	-379.353	-64.607	42.224	188.933	-21.1758	-250.52
			-147.897	166.849	273.68	420.389	210.28	-19.0636
			314.746	421.577	568.285	358.177	128.833
			106.831	253.54	43.4313	-185.913
			146.709	-63.3998	-292.744
			-210.108	-439.452
			-229.344
MT#10 (4)			-515.014	-491.041	-542.544	-642.795	-709.729	-912.421	-1245.83	-1302.26	-1323.29	-1293.98	-1678.76	-1743.95
			23.9731	-27.53	-127.781	-194.715	-397.407	-730.815	-787.245	-808.277	-778.97	-1163.75	-1228.93
			-51.5031	-151.754	-218.688	-421.38	-754.788	-811.218	-832.25	-802.944	-1187.72	-1252.9
			-100.251	-167.185	-369.877	-703.285	-759.715	-780.747	-751.44	-1136.22	-1201.4
			-66.9343	-269.626	-603.034	-659.465	-680.496	-651.19	-1035.97	-1101.15
			-202.692	-536.1	-592.53	-613.562	-584.255	-969.035	-1034.22
			-333.408	-389.838	-410.87	-381.563	-766.343	-831.524
			-56.4305	-77.4624	-48.1556	-432.935	-498.116
			-21.0319	8.27496	-376.504	-441.686
			29.3069	-355.473	-420.654
			-384.779	-449.961
			-65.1812
MT#10 (5)			-148.209	-415.889	-657.57	-742.124	-1122.12	-1253.39	-1443.3	-1422.15	-1404.84	-1673.41	-1823.49	-2014.92	-2078.3	-2081.31	-1974.07	-1736.87	-2222.9	-2251.78	-2438.72	-2564.36	-2907.64	-3359.46	-3730.29	-3409.56	-3626.98	-3729.26	-4067.52	-4344.37	-4450.04	-4580.28
			-267.68	-509.361	-593.915	-973.909	-1105.18	-1295.09	-1273.94	-1256.63	-1525.21	-1675.28	-1866.72	-1930.09	-1933.11	-1825.86	-1588.66	-2074.69	-2103.57	-2290.51	-2416.15	-2759.43	-3211.25	-3582.08	-3261.35	-3478.77	-3581.05	-3919.32	-4196.16	-4301.83	-4432.07
			-241.681	-326.235	-706.229	-837.501	-1027.41	-1006.26	-988.951	-1257.53	-1407.6	-1599.04	-1662.41	-1665.43	-1558.18	-1320.98	-1807.01	-1835.89	-2022.83	-2148.47	-2491.75	-2943.57	-3314.4	-2993.67	-3211.09	-3313.37	-3651.64	-3928.48	-4034.15	-4164.39
			-84.5536	-464.548	-595.82	-785.73	-764.579	-747.269	-1015.84	-1165.92	-1357.35	-1420.73	-1423.74	-1316.5	-1079.3	-1565.33	-1594.21	-1781.15	-1906.79	-2250.07	-2701.88	-3072.72	-2751.99	-2969.41	-3071.69	-3409.95	-3686.8	-4450.04	-3922.71
			-379.994	-511.267	-701.176	-680.025	-662.716	-931.29	-1081.37	-1272.8	-1336.18	-1339.19	-1231.95	-994.746	-1480.78	-1509.66	-1696.59	-1822.23	-2165.51	-2617.33	-2988.16	-2667.44	-2884.85	-2987.14	-3325.4	-3602.25	-3707.91	-4432.07
			-131.272	-321.182	-300.031	-282.721	-551.296	-701.371	-892.806	-956.184	-959.196	-851.953	-614.752	-1100.78	-1129.66	-1316.6	-1442.24	-1785.52	-2237.34	-2608.17	-2287.44	-2504.86	-2607.14	-2945.41	-3222.25	-3327.92	-3458.16
			-189.91	-168.759	-151.449	-420.024	-570.099	-761.534	-824.911	-827.924	-720.681	-483.48	-969.512	-998.391	-1185.33	-1310.97	-1654.25	-2106.06	-2476.89	-2156.17	-2373.59	-2475.87	-2814.13	-3090.98	-3196.65	-3326.88
			21.1511	38.4605	-230.114	-380.189	-571.624	-635.002	-638.014	-530.771	-293.57	-779.602	-808.481	-995.416	-1121.06	-1464.34	-1916.15	-2286.99	-1966.26	-2183.68	-2285.96	-2624.22	-2901.07	-3006.74	-3136.98
			17.3094	-251.265	-401.34	-592.775	-656.153	-659.165	-551.922	-314.721	-800.753	-829.632	-1016.57	-1142.21	-1485.49	-1937.31	-2308.14	-1987.41	-2204.83	-2307.11	-2645.38	-2922.22	-3027.89	-3158.13
			-268.574	-418.65	-610.085	-673.462	-676.475	-569.232	-332.03	-818.063	-846.942	-1033.88	-1159.52	-1502.8	-1954.62	-2325.45	-2004.72	-2222.14	-2324.42	-2662.68	-2939.53	-3045.2	-3175.44
			-150.075	-341.51	-404.888	-407.9	-300.657	-63.4559	-549.488	-578.367	-765.303	-890.942	-1234.22	-1686.04	-2056.87	-1736.15	-1953.56	-2055.85	-2394.11	-2670.96	-2776.62	-2906.86
			-191.435	-254.813	-257.825	-150.582	86.6192	-399.413	-428.292	-615.227	-740.866	-1084.15	-1535.97	-1906.8	-1586.07	-1803.49	-1905.77	-2244.04	-2520.88	-2626.55	-2756.79
			-63.3776	-66.39	40.8529	278.054	-207.978	-236.857	-423.792	-549.431	-892.711	-1344.53	-1715.36	-1394.64	-1612.05	-1714.34	-2052.6	-2329.45	-2435.11	-2565.35
			-3.0124	104.23	341.432	-144.6	-173.48	-360.415	-486.054	-829.334	-1281.15	-1651.98	-1331.26	-1548.68	-1650.96	-1989.22	-2266.07	-2371.74	-2501.97
			107.243	344.444	-141.588	-170.467	-357.402	-483.041	-826.321	-1278.14	-1648.97	-1328.25	-1545.66	-1647.95	-1986.21	-2263.06	-2368.72	-2498.96
			237.201	-248.831	-277.71	-464.645	-590.284	-933.564	-1385.38	-1756.21	-1435.49	-1652.91	-1755.19	-2093.45	-2370.3	-2475.97	-2606.2
			-486.032	-514.911	-701.847	-827.486	-1170.77	-1622.58	-1993.42	-1672.69	-1890.11	-1992.39	-2330.65	-2607.5	-2713.17	-2843.41
			-28.8793	-215.814	-341.453	-684.733	-1136.55	-1507.38	-1186.66	-1404.08	-1506.36	-1844.62	-2121.47	-2227.14	-2357.37
			-186.935	-312.574	-655.854	-1107.67	-1478.5	-1157.78	-1375.2	-1477.48	-1815.74	-2092.59	-2198.26	-2328.49
			-125.639	-468.919	-920.738	-1291.57	-970.843	-1188.26	-1290.55	-1628.81	-1905.65	-2011.32	-2141.56
			-343.28	-795.099	-1165.93	-845.204	-1062.62	-1164.91	-1503.17	-1780.01	-1885.68	-2015.92
			-451.819	-822.65	-501.924	-719.343	-821.627	-1159.89	-1436.73	-1542.4	-1672.64
			-370.83	-50.1046	-267.523	-369.807	-708.069	-984.916	-1090.58	-1220.82
			320.726	103.307	1.02296	-337.239	-614.085	-719.753	-849.99
			-217.419	-319.703	-657.965	-934.811	-1040.48	-1170.72
			-102.284	-440.546	-717.392	-823.06	-953.297
			-338.262	-615.108	-720.776	-851.013
			-276.846	-382.514	-512.751
			-105.668	-235.905
			-130.237
MT#10 (6)			-320.304	-508.437	-423.822	-425.411	-871.903	-1165.81	-1227.76	-1355.25	-933.453	-678.618	-636.407	-698.5	-466.065	-466.065	-573.072	-573.063
			-188.133	-103.518	-105.107	-551.599	-845.508	-907.459	-1034.94	-613.149	-358.314	-316.103	-378.196	-145.761	-145.761	-252.768	-252.758
			84.6153	83.0262	-363.466	-657.375	-719.326	-846.809	-425.016	-170.181	-127.969	-190.063	42.3724	42.3724	-64.6348	-64.6254
			-1.58904	-448.081	-741.991	-803.941	-931.424	-509.631	-254.796	-212.585	-274.678	-42.2428	-42.2428	-149.25	-149.241
			-446.492	-740.402	-802.352	-929.835	-508.042	-253.207	-210.996	-273.089	-40.6538	-40.6538	-147.661	-147.652
			-293.909	-355.86	-483.343	-61.5501	193.285	235.497	173.403	405.838	405.838	298.831	298.841
			-61.9504	-189.433	232.359	487.195	529.406	467.313	699.748	699.748	592.741	592.75
			-127.483	294.31	549.145	591.356	529.263	761.698	761.698	654.691	654.7
			421.793	676.628	718.839	656.746	889.181	889.181	782.174	782.183
			254.835	297.047	234.953	467.389	467.389	360.381	360.391
			42.2113	-19.882	212.553	212.553	105.546	105.555
			-62.0933	170.342	170.342	63.3347	63.3441
			232.435	232.435	125.428	125.437
			0	-107.007	-106.998
			-107.007	-106.998
			0.00938637
	N	0	636	601	566	531	497	466	437	408	381	357	333	310	290	274	259	244	229	216	204	193	182	172	162	152	142	132	122	112	103	95	87	80	74	69	66	63	60	57	54	51	48	45	42	39	36	34	32
	Average	0	-166.217	-321.446	-464.216	-590.373	-703.244	-809.439	-895.104	-960.518	-1015.14	-1063.42	-1085.95	-1090.52	-1088.68	-1122.27	-1162.94	-1196.42	-1215.41	-1219.43	-1235.14	-1227.79	-1205.51	-1214.09	-1217.64	-1214.13	-1202.93	-1278.67	-1136.48	-1072.2	-977.876	-907.331	-802.481	-715.361	-683.129	-705.019	-735.512	-772.477	-805.74	-849.423	-880.456	-908.271	-941.918	-971.501	-1007.6	-1056.34	-1085.08	-1111.36	-1149.4
	SD	0	266.957	464.453	659.049	822.903	976.357	1121.28	1255.87	1365.78	1453.03	1530.32	1574.21	1587.69	1593.01	1641.55	1701.75	1749.25	1776.79	1785.16	1798.98	1791.08	1743.82	1774.96	1785.06	1780.37	1770.49	1819.73	1691.45	1606.18	1452.21	1332.74	1106.13	824.338	649.947	643.781	655.101	662.919	680.641	689.374	703.618	706.189	704.136	707.089	692.106	679.519	682.871	693.783	704.803
	SEM	0	10.5855	18.9454	27.7019	35.711	43.7956	51.9423	60.0764	67.6162	74.4408	80.9932	86.2664	90.1749	93.5447	99.1695	105.742	111.984	117.413	121.465	125.954	128.925	129.261	135.34	140.247	144.407	148.577	158.387	153.137	151.77	143.09	136.737	118.59	92.1637	75.5548	77.5021	80.6374	83.5199	87.8704	91.3098	95.7503	98.8862	101.633	105.407	106.794	108.81	113.812	118.983	124.593
	Time	0	1	2	3	4	5	6	7	8	9	10	11	12	13	14	15	16	17	18	19	20	21	22	23	24	25	26	27	28	29	30	31	32	33	34	35	36	37	38	39	40	41	42	43	44	45	46	47
														0	-166.217	-321.446	-464.216	-590.373	-703.244	-809.439	-895.104
														0	10.5855	18.9454	27.7019	35.711	43.7956	51.9423	60.0764
														0	0
														-166.217	10.5855
														-321.446	18.9454
														-464.216	27.7019
														-590.373	35.711
														-703.244	43.7956
														-809.439	51.9423
														-895.104	60.0764
[truncated: 117 more columns]

## Sheet: Cin8NLCut7
	Molecules	30											MD
			-813.197	-1309.09	-1563.81	-1833.24	-2239.5	-2764.51
MT#4 (1)			-495.889	-750.614	-1020.05	-1426.31	-1951.31
			-254.725	-524.157	-930.417	-1455.43
			-269.433	-675.693	-1200.7
			-406.26	-931.268
			-525.008
MT#4 (2)			-94.6224	-66.9483	84.582	-108.021	-370.265	-770.571	-969.551	-1004.02	-1100.99	-1092.5	-1215.63	-1052.87	-1240.49	-1344.49	-1274.66	-1180.29	-1508.88	-1673.44	-1737.82	-1667.36	-1703.06	-1679.03	-1533.01	-1585.17	-1289.16	-1391.41	-1438.42	-1193.83	-1473.96	-1234.29	-1063.69	-966.334	-1162.47	-1156.66	-1274.45	-1203.64	-1122.09	-1325.61
			27.6741	179.204	-13.3982	-275.643	-675.949	-874.928	-909.401	-1006.37	-997.873	-1121.01	-958.251	-1145.87	-1249.87	-1180.04	-1085.67	-1414.26	-1578.82	-1643.2	-1572.74	-1608.44	-1584.41	-1438.39	-1490.55	-1194.53	-1296.79	-1343.8	-1099.21	-1379.34	-1139.67	-969.069	-871.711	-1067.85	-1062.04	-1179.82	-1109.02	-1027.47	-1230.99
			151.53	-41.0723	-303.317	-703.623	-902.602	-937.075	-1034.04	-1025.55	-1148.68	-985.925	-1173.54	-1277.54	-1207.71	-1113.34	-1441.93	-1606.49	-1670.88	-1600.41	-1636.11	-1612.08	-1466.06	-1518.22	-1222.21	-1324.46	-1371.47	-1126.88	-1407.01	-1167.34	-996.744	-899.386	-1095.52	-1089.71	-1207.5	-1136.69	-1055.14	-1258.67
			-192.603	-454.847	-855.153	-1054.13	-1088.61	-1185.57	-1177.08	-1300.22	-1137.46	-1325.07	-1429.07	-1359.24	-1264.87	-1593.46	-1758.02	-1822.41	-1751.94	-1787.64	-1763.61	-1617.59	-1669.75	-1373.74	-1475.99	-1523	-1278.42	-1473.96	-1318.87	-1148.27	-1050.92	-1247.05	-1241.24	-1359.03	-1288.23	-1206.67	-1410.2
			-262.245	-662.551	-861.53	-896.003	-992.968	-984.475	-1107.61	-944.853	-1132.47	-1236.47	-1166.64	-1072.27	-1400.86	-1565.42	-1629.8	-1559.34	-1595.04	-1571.01	-1424.99	-1477.15	-1181.14	-1283.39	-1330.4	-1085.81	-1365.94	-1139.67	-955.671	-858.313	-1054.45	-1048.64	-1166.43	-1095.62	-1014.07	-1217.59
			-400.306	-599.285	-633.758	-730.724	-722.23	-845.368	-682.608	-870.227	-974.227	-904.396	-810.026	-1138.61	-1303.18	-1367.56	-1297.09	-1332.79	-1308.77	-1162.74	-1214.9	-918.891	-1021.15	-1068.16	-823.568	-1103.69	-864.025	-996.744	-596.068	-792.204	-786.396	-904.182	-833.378	-751.827	-955.349
			-198.979	-233.452	-330.418	-321.924	-445.062	-282.302	-469.921	-573.921	-504.09	-409.72	-738.306	-902.87	-967.253	-896.789	-932.486	-908.461	-762.438	-814.598	-518.585	-620.84	-667.851	-423.262	-703.389	-463.719	-293.121	-1050.92	-391.898	-386.09	-503.876	-433.072	-351.521	-555.043
			-34.4724	-131.438	-122.945	-246.082	-83.3228	-270.942	-374.942	-305.111	-210.74	-539.327	-703.891	-768.274	-697.809	-733.507	-709.481	-563.458	-615.619	-319.606	-421.861	-468.872	-224.282	-504.409	-264.74	-94.1412	3.21692	-1054.45	-187.111	-304.896	-234.092	-152.541	-356.063
			-96.9659	-88.4722	-211.61	-48.8503	-236.469	-340.469	-270.638	-176.268	-504.855	-669.418	-733.801	-663.337	-699.034	-675.009	-528.986	-581.146	-285.134	-387.389	-434.399	-189.81	-469.937	-230.268	-59.6687	37.6894	-158.446	-786.396	-270.424	-199.62	-118.069	-321.591
			8.4937	-114.644	48.1155	-139.503	-243.503	-173.673	-79.302	-407.889	-572.453	-636.835	-566.371	-602.068	-578.043	-432.02	-484.18	-188.168	-290.423	-337.433	-92.844	-372.971	-133.302	37.2971	134.655	-61.48	-55.6728	-503.876	-102.654	-21.1031	-224.625
			-123.138	39.6218	-147.997	-251.997	-182.166	-87.7957	-416.383	-580.946	-645.329	-574.865	-610.562	-586.537	-440.514	-492.674	-196.661	-298.916	-345.927	-101.338	-381.465	-141.795	28.8034	126.162	-69.9737	-64.1665	-181.952	-234.092	-29.5968	-233.119
			162.76	-24.8592	-128.859	-59.0283	35.3422	-293.245	-457.808	-522.191	-451.727	-487.424	-463.399	-317.376	-369.536	-73.5235	-175.779	-222.789	21.8002	-258.327	-18.6576	151.941	249.299	53.1642	58.9714	-58.8139	11.99	-118.069	-109.981
			-187.619	-291.619	-221.788	-127.418	-456.004	-620.568	-684.951	-614.487	-650.184	-626.159	-480.136	-532.296	-236.283	-338.538	-385.549	-140.96	-421.087	-181.417	-10.8184	86.5397	-109.596	-103.788	-221.574	-150.77	-69.2186	-224.625
			-104	-34.1692	60.2014	-268.385	-432.949	-497.332	-426.868	-462.565	-438.54	-292.517	-344.677	-48.6643	-150.919	-197.93	46.6593	-233.468	6.20161	176.8	274.159	78.0233	83.8306	-33.9547	36.8492	118.4	-85.1217
			69.8308	164.201	-164.386	-328.949	-393.332	-322.868	-358.565	-334.54	-188.517	-240.677	55.3356	-46.9195	-93.93	150.659	-129.468	110.202	280.8	378.158	182.023	187.83	70.0452	140.849	222.4	18.8782
			94.3705	-234.216	-398.78	-463.163	-392.698	-428.396	-404.37	-258.348	-310.508	-14.4952	-116.75	-163.761	80.8285	-199.299	40.3708	210.97	308.328	112.193	118	0.214426	71.0183	152.569	-50.9526
			-328.587	-493.151	-557.533	-487.069	-522.766	-498.741	-352.718	-404.878	-108.866	-211.121	-258.131	-13.542	-293.669	-53.9998	116.599	213.957	17.822	23.6292	-94.1561	-23.3522	58.1989	-145.323
			-164.564	-228.946	-158.482	-194.18	-170.154	-24.1314	-76.2916	219.721	117.466	70.4556	315.045	34.9177	274.587	445.186	542.544	346.409	352.216	234.431	305.235	386.786	183.264
			-64.3828	6.08153	-29.6159	-5.59047	140.432	88.2721	384.285	282.03	235.019	479.609	199.481	439.151	609.75	707.108	510.973	516.78	398.994	469.798	551.349	347.827
			70.4643	34.7669	58.7923	204.815	152.655	448.668	346.413	299.402	543.991	263.864	503.534	674.132	771.491	575.355	581.163	463.377	534.181	615.732	412.21
			-35.6974	-11.672	134.351	82.1906	378.203	275.948	228.938	473.527	193.4	433.069	603.668	701.026	504.891	510.698	392.913	463.717	545.268	341.746
			24.0254	170.048	117.888	413.901	311.646	264.635	509.224	229.097	468.767	639.366	736.724	540.588	546.396	428.61	499.414	580.965	377.443
			146.023	93.8626	389.875	287.62	240.61	485.199	205.072	444.741	615.34	712.698	516.563	522.37	404.585	475.389	556.94	353.418
			-52.1602	243.852	141.597	94.5869	339.176	59.0491	298.718	469.317	566.675	370.54	376.347	258.562	329.366	410.917	207.395
			296.013	193.758	146.747	391.336	111.209	350.879	521.478	618.836	422.7	428.508	310.722	381.526	463.077	259.555
			-102.255	-149.266	95.3237	-184.803	54.8659	225.465	322.823	126.688	132.495	14.7096	85.5135	167.065	-36.4574
			-47.0105	197.579	-82.5484	157.121	327.72	425.078	228.943	234.75	116.965	187.769	269.32	65.7976
			244.589	-35.5378	204.132	374.73	472.088	275.953	281.76	163.975	234.779	316.33	112.808
			-280.127	-40.4577	130.141	227.499	31.364	37.1712	-80.6141	-9.81018	71.7409	-131.781
			239.669	410.268	507.626	311.491	317.298	199.513	270.317	351.868	148.346
			170.599	267.957	71.8217	77.629	-40.1563	30.6475	112.199	-91.3234
			97.3581	-98.7771	-92.9699	-210.755	-139.951	-58.4002	-261.922
			-196.135	-190.328	-308.113	-237.309	-155.758	-359.28
			5.80723	-111.978	-41.1742	40.3769	-163.145
			-117.785	-46.9814	34.5697	-168.952
			70.8039	152.355	-51.167
			81.5511	-121.971
			-203.522
MT#5 (1)			-857.838	-1208.17	-1619.56	-1905.26	-2321.23	-2863.84	-3369.24	-3529.39	-3820.7	-4290.48	-4417.36	-5373.35	-5347.59
			-350.332	-761.723	-1047.43	-1463.39	-2006.01	-2511.4	-2671.56	-2962.86	-3432.64	-3559.52	-4515.52	-4489.75
			-411.391	-697.095	-1113.06	-1655.67	-2161.07	-2321.22	-2612.53	-3082.31	-3209.19	-4165.18	-4139.42
			-285.703	-701.666	-1244.28	-1749.68	-1909.83	-2201.14	-2670.92	-2797.8	-3753.79	-3728.03
			-415.962	-958.578	-1463.98	-1624.13	-1915.44	-2385.22	-2512.1	-3468.09	-3442.33
			-542.616	-1048.02	-1208.17	-1499.47	-1969.25	-2096.13	-3052.13	-3026.36
			-505.399	-665.552	-956.858	-1426.64	-1553.52	-2509.51	-2483.75
			-160.153	-451.459	-921.239	-1048.12	-2004.11	-1978.35
			-291.306	-761.086	-887.965	-1843.96	-1818.19
			-469.781	-596.659	-1552.65	-1526.89
			-126.878	-1082.87	-1057.11
			-955.994	-930.23
			25.7635
MT#1 (1)			44.9013	-266.113	-960.929	-1367.56	-2201.14	-2425.34	-2490.71	-2450.77	-2926.22	-3272.72	-3380.63	-3311.49	-3027.09	-2954.84	-3096.07	-2898.52
			-311.015	-1005.83	-1412.46	-2246.04	-2470.25	-2535.61	-2495.67	-2971.12	-3317.62	-3425.53	-3356.39	-3071.99	-2999.74	-3140.97	-2943.43
			-694.816	-1101.44	-1935.02	-2159.23	-2224.59	-2184.66	-2660.1	-3006.6	-3114.52	-3045.37	-2760.98	-2688.73	-2829.96	-2632.41
			-406.626	-1240.21	-1464.42	-1529.78	-1489.84	-1965.29	-2311.79	-2419.7	-2350.56	-2066.16	-1993.91	-2135.14	-1937.6
			-833.581	-1057.79	-1123.15	-1083.22	-1558.66	-1905.16	-2013.07	-1943.93	-1659.54	-1587.28	-1728.52	-1530.97
			-224.208	-289.57	-249.637	-725.079	-1071.58	-1179.49	-1110.35	-825.956	-753.704	-894.937	-697.388
			-65.3614	-25.4284	-500.87	-847.37	-955.285	-886.144	-601.748	-529.496	-670.728	-473.18
			39.933	-435.509	-782.009	-889.924	-820.782	-536.386	-464.134	-605.367	-407.819
			-475.442	-821.942	-929.857	-860.715	-576.319	-504.067	-645.3	-447.752
			-346.5	-454.414	-385.273	-100.877	-28.6252	-169.858	27.6905
			-107.915	-38.7734	245.623	317.875	176.642	374.19
			69.1411	353.537	425.789	284.557	482.105
			284.396	356.648	215.416	412.964
			72.252	-68.9804	128.568
			-141.232	56.3157
			197.548
MT#1 (2)			-158.75	-208.803	-826.873	231.143	477.307	797.709	1016.5	1224.95
			-50.053	-668.123	389.893	636.057	956.459	1175.25	1383.7
			-618.07	439.947	686.11	1006.51	1225.3	1433.75
			1058.02	1304.18	1624.58	1843.37	2051.82
			246.164	566.565	785.352	993.806
			320.402	539.189	747.642
			218.787	427.241
			208.453
MT#2 (4)			-447.044	-1158.98	-1699.89	-2123.34	-2963.91	-3642.61	-2837.01	-3153.86	-3419.14	-3698.91	-3549.76	-3523.28	-4227.64	-3683.31
			-711.94	-1252.84	-1676.29	-2516.87	-3195.57	-2389.97	-2706.81	-2972.09	-3251.87	-3102.71	-3076.24	-3780.6	-3236.26
			-540.902	-964.353	-1804.93	-2483.63	-1678.03	-1994.87	-2260.15	-2539.93	-2390.77	-2364.3	-3068.66	-2524.32
			-423.451	-1264.02	-1942.73	-1137.12	-1453.97	-1719.25	-1999.02	-1849.87	-1823.4	-2527.76	-1983.42
			-840.573	-1519.28	-713.673	-1030.52	-1295.8	-1575.57	-1426.42	-1399.95	-2104.3	-1559.97
			-678.702	126.9	-189.946	-455.228	-734.999	-585.848	-559.375	-1263.73	-719.398
			805.603	488.757	223.475	-56.297	92.8542	119.328	-585.029	-40.6958
			-316.846	-582.128	-861.9	-712.748	-686.275	-1390.63	-846.298
			-265.282	-545.054	-395.902	-369.429	-1073.79	-529.452
			-279.772	-130.62	-104.147	-808.504	-264.17
			149.151	175.625	-528.732	15.6012
			26.4734	-677.883	-133.55
			-704.356	-160.023
			544.333
MT#3 (1)			-654.152	-1270.79	-1805.03	-2776.99	-3355.45
			-616.634	-1150.88	-2122.84	-2701.3
			-534.249	-1506.21	-2084.67
			-971.956	-1550.42
			-578.46
MT#6 (1)			63.5	-212.642	-1037.08	-1418.08	-1312.46	-1883.91	-2095.93
			-276.142	-1100.58	-1481.58	-1375.96	-1947.41	-2159.43
			-824.44	-1205.44	-1099.82	-1671.27	-1883.28
			-381	-275.38	-846.828	-1058.84
			105.62	-465.828	-677.845
			-571.448	-783.464
			-212.016
MT#6 (2)			-308.162	-626.792	-953.438
			-318.63	-645.276
			-326.646
MT#7 (1)			-133.856	42.291	-84.709	-369.752	-863.693	-785.452	-1216.95	-1663.47	-2007.34	-2608.38	-3059.53	-3553.22	-4025.14	-4789.94	-4995.75
			176.147	49.1474	-235.896	-729.837	-651.595	-1083.09	-1529.61	-1873.48	-2474.53	-2925.67	-3419.36	-3891.28	-4656.08	-4861.89
			-127	-412.043	-905.984	-827.743	-1259.24	-1705.76	-2049.63	-2650.68	-3101.82	-3595.51	-4067.43	-4832.23	-5038.04
			-285.043	-778.984	-700.743	-1132.24	-1578.76	-1922.63	-2523.68	-2974.82	-3468.51	-3940.43	-4705.23	-4911.04
			-493.941	-415.7	-847.193	-1293.71	-1637.59	-2238.63	-2689.78	-3183.46	-3655.38	-4420.19	-4626
			78.2418	-353.252	-799.773	-1143.64	-1744.69	-2195.84	-2689.52	-3161.44	-3926.24	-4132.05
			-431.494	-878.015	-1221.89	-1822.93	-2274.08	-2767.76	-3239.68	-4004.49	-4210.3
			-446.521	-790.392	-1391.44	-1842.58	-2336.27	-2808.19	-3572.99	-3778.8
			-343.871	-944.919	-1396.06	-1889.75	-2361.67	-3126.47	-3332.28
			-601.048	-1052.19	-1545.88	-2017.8	-2782.6	-2988.41
			-451.145	-944.831	-1416.75	-2181.55	-2387.36
			-493.686	-965.606	-1730.41	-1936.22
			-471.92	-1236.72	-1442.53
			-764.802	-970.612
			-205.81
MT#7 (2)			169.418	66.9483	-63.5	-89.8026	560.492	503.165	550.826	703.694	838.699	706.466	914.142	1308.45	1272.82	1350.2
			-102.47	-232.918	-259.221	391.074	333.747	381.408	534.276	669.281	537.048	744.724	1139.03	1103.4	1180.78
			-130.448	-156.751	493.544	436.217	483.878	636.746	771.751	639.518	847.194	1241.5	1205.87	1283.25
			-26.3026	623.992	566.665	614.326	767.194	902.199	769.966	977.642	1371.95	1336.32	1413.7
			650.295	592.968	640.629	793.497	928.502	796.268	1003.94	1398.25	1362.62	1440
			-57.3273	-9.66592	143.202	278.207	145.973	353.65	747.958	712.33	789.709
			47.6614	200.529	335.534	203.301	410.977	805.285	769.657	847.036
			152.868	287.873	155.639	363.316	757.624	721.995	799.375
			135.005	2.77173	210.448	604.756	569.128	646.507
			-132.233	75.4432	469.751	434.123	511.502
			207.676	601.984	566.356	643.735
			394.308	358.68	436.059
			-35.6281	41.7511
			77.3792
MT#7 (3)			-133.897	-217.904	-475.697	-542.544	-756.421	-870.127	-1010.89	-1442.59	-1756.25	-2151.7	-2618.17	-3414.23	-3739.1	-4548.66	-4815.8	-5452.5	-5985.96	-6531.04
			-84.0071	-341.801	-408.648	-622.524	-736.23	-876.991	-1308.69	-1622.36	-2017.81	-2484.28	-3280.33	-3605.2	-4414.76	-4681.9	-5318.61	-5852.06	-6397.14
			-257.794	-324.641	-538.517	-652.223	-792.984	-1224.68	-1538.35	-1933.8	-2400.27	-3196.32	-3521.2	-4330.76	-4597.89	-5234.6	-5768.06	-6313.13
			-66.8468	-280.724	-394.429	-535.19	-966.89	-1280.56	-1676	-2142.47	-2938.53	-3263.4	-4072.96	-4340.1	-4976.8	-5510.26	-6055.34
			-213.877	-327.582	-468.344	-900.043	-1213.71	-1609.16	-2075.63	-2871.68	-3196.56	-4006.11	-4273.25	-4909.96	-5443.42	-5988.49
			-113.706	-254.467	-686.166	-999.834	-1395.28	-1861.75	-2657.8	-2982.68	-3792.24	-4059.38	-4696.08	-5229.54	-5774.61
			-140.761	-572.461	-886.128	-1281.58	-1748.05	-2544.1	-2868.97	-3678.53	-3945.67	-4582.38	-5115.83	-5660.91
			-431.7	-745.367	-1140.81	-1607.28	-2403.34	-2728.21	-3537.77	-3804.91	-4441.61	-4975.07	-5520.15
			-313.667	-709.115	-1175.58	-1971.64	-2296.51	-3106.07	-3373.21	-4009.91	-4543.37	-5088.45
			-395.447	-861.917	-1657.97	-1982.85	-2792.4	-3059.54	-3696.25	-4229.7	-4774.78
			-466.47	-1262.52	-1587.4	-2396.96	-2664.09	-3300.8	-3834.26	-4379.33
			-796.053	-1120.93	-1930.49	-2197.62	-2834.33	-3367.79	-3912.86
			-324.874	-1134.43	-1401.57	-2038.28	-2571.73	-3116.81
			-809.559	-1076.7	-1713.4	-2246.86	-2791.94
			-267.138	-903.843	-1437.3	-1982.38
			-636.706	-1170.16	-1715.24
			-533.457	-1078.53
			-545.076
MT#7 (4)			-236.726	-503.165	-925.842	-1473.89	-1942.33
			-266.439	-689.115	-1237.17	-1705.6
			-422.677	-970.729	-1439.16
			-548.053	-1016.49
			-468.435
MT#8 (1)			87.2006	-47.3112	59.8085	29.8145	76.294	278.333	128.759	466.065	456.945	287.829	722.378	804.291	741.095	571.893	402.641	42.291	322.362	494.106	339.246	47.2544	-47.3681	59.8085	76.294	94.6224	-66.9483
			-134.512	-27.392	-57.3861	-10.9065	191.133	41.5582	378.864	369.745	200.629	635.178	717.09	653.894	484.693	315.44	-44.9096	235.162	406.906	252.045	-39.9461	-134.569	-27.392	-10.9065	7.42186	-154.149
			107.12	77.1257	123.605	325.644	176.07	513.376	504.256	335.141	769.69	851.602	788.406	619.205	449.952	89.6022	369.673	541.418	386.557	94.5656	-0.0568982	107.12	123.605	141.934	-19.6371
			-29.9941	16.4855	218.525	68.9503	406.256	397.137	228.021	662.57	744.482	681.286	512.085	342.832	-17.5175	262.554	434.298	279.437	-12.5541	-107.177	0	16.4855	34.8139	-126.757
			46.4796	248.519	98.9443	436.25	427.131	258.015	692.564	774.477	711.28	542.079	372.827	12.4765	292.548	464.292	309.431	17.44	-77.1826	29.9941	46.4796	64.808	-96.7627
			202.039	52.4647	389.771	380.651	211.535	646.084	727.997	664.801	495.599	326.347	-34.003	246.068	417.812	262.952	-29.0396	-123.662	-16.4855	0	18.3284	-143.242
			-149.574	187.732	178.612	9.49609	444.045	525.958	462.761	293.56	124.308	-236.042	44.0289	215.773	60.9124	-231.079	-325.701	-218.525	-202.039	-183.711	-345.282
			337.306	328.186	159.071	593.62	675.532	612.336	443.135	273.882	-86.4678	193.603	365.348	210.487	-81.5044	-176.127	-68.9503	-52.4647	-34.1364	-195.707
			-9.11967	-178.235	256.314	338.226	275.03	105.829	-63.4238	-423.774	-143.703	28.0415	-126.819	-418.81	-513.433	-406.256	-389.771	-371.442	-533.013
			-169.116	265.433	347.346	284.149	114.948	-54.3042	-414.654	-134.583	37.1612	-117.7	-409.691	-504.313	-397.137	-380.651	-362.323	-523.893
			434.549	516.462	453.265	284.064	114.812	-245.538	34.5328	206.277	51.4163	-240.575	-335.197	-228.021	-211.535	-193.207	-354.778
			81.9126	18.7162	-150.485	-319.737	-680.087	-400.016	-228.272	-383.133	-675.124	-769.746	-662.57	-646.084	-627.756	-789.327
			-63.1965	-232.398	-401.65	-762	-481.929	-310.185	-465.045	-757.037	-851.659	-744.482	-727.997	-709.669	-871.239
			-169.201	-338.454	-698.804	-418.732	-246.988	-401.849	-693.84	-788.463	-681.286	-664.801	-646.472	-808.043
			-169.252	-529.602	-249.531	-77.7871	-232.648	-524.639	-619.262	-512.085	-495.599	-477.271	-638.842
			-360.35	-80.2788	91.4654	-63.3954	-355.387	-450.009	-342.832	-326.347	-308.019	-469.589
			280.071	451.815	296.955	4.96341	-89.6591	17.5175	34.003	52.3314	-109.239
			171.744	16.8835	-275.108	-369.73	-262.554	-246.068	-227.74	-389.31
			-154.861	-446.852	-541.474	-434.298	-417.812	-399.484	-561.055
			-291.991	-386.614	-279.437	-262.952	-244.623	-406.194
			-94.6225	12.5541	29.0396	47.368	-114.203
			107.177	123.662	141.991	-19.5802
			16.4855	34.8139	-126.757
			18.3284	-143.242
			-161.571
MT#8 (2)			-530.906	-889.253	-1293.98	-1743.96	-2081.2	-2529.54	-2790.91	-3263.38	-3361.4
			-358.347	-763.078	-1213.05	-1550.29	-1998.63	-2260	-2732.47	-2830.49
			-404.732	-854.705	-1191.95	-1640.28	-1901.66	-2374.13	-2472.15
			-449.973	-787.213	-1235.55	-1496.92	-1969.4	-2067.41
			-337.24	-785.58	-1046.95	-1519.42	-1617.44
			-448.339	-709.711	-1182.18	-1280.2
			-261.372	-733.844	-831.862
			-472.471	-570.49
			-98.0186
MT#8 (3)			-446.507	-940.036	-1312.03	-1802.52	-2143.62	-2586.36	-2916.12	-3439.57	-3883.05	-4421.39	-5455.79	-6046.82	-6259.43	-6603.51	-6630.48
			-493.529	-865.519	-1356.01	-1697.11	-2139.85	-2469.61	-2993.07	-3436.54	-3974.88	-5009.28	-5600.31	-5812.92	-6157.01	-6183.97
			-371.99	-862.482	-1203.58	-1646.32	-1976.08	-2499.54	-2943.02	-3481.35	-4515.75	-5106.79	-5319.4	-5663.48	-5690.44
			-490.492	-831.591	-1274.33	-1604.09	-2127.55	-2571.03	-3109.36	-4143.76	-4734.8	-4947.41	-5291.49	-5318.46
			-341.099	-783.838	-1113.6	-1637.06	-2080.53	-2618.87	-3653.27	-4244.3	-4456.91	-4801	-4827.96
			-442.74	-772.499	-1295.96	-1739.43	-2277.77	-3312.17	-3903.2	-4115.81	-4459.9	-4486.86
			-329.759	-853.218	-1296.69	-1835.03	-2869.43	-3460.47	-3673.08	-4017.16	-4044.12
			-523.458	-966.936	-1505.27	-2539.67	-3130.71	-3343.32	-3687.4	-3714.37
			-443.477	-981.816	-2016.21	-2607.25	-2819.86	-3163.94	-3190.91
			-538.339	-1572.74	-2163.77	-2376.38	-2720.46	-2747.43
			-1034.4	-1625.43	-1838.04	-2182.12	-2209.09
			-591.033	-803.643	-1147.72	-1174.69
			-212.61	-556.692	-583.659
			-344.082	-371.049
			-26.9678
MT#1 (2)			-295.292	-1101	-1190.1	-1766.7	-2272.95	-2620.91	-2874.47	-2952.45
			-805.705	-894.804	-1471.4	-1977.66	-2325.62	-2579.18	-2657.16
			-89.0984	-665.698	-1171.96	-1519.92	-1773.47	-1851.45
			-576.6	-1082.86	-1430.82	-1684.38	-1762.36
			-506.258	-854.218	-1107.78	-1185.76
			-347.96	-601.517	-679.497
			-253.557	-331.537
			-77.9801
MT#1 (3)			-421.517	-920.506	-1520.68	-1740.27	-1843.93	-2044.66	-2891.81	-3409.3	-3707.08	-3865.01
			-498.989	-1099.16	-1318.76	-1422.41	-1623.15	-2470.3	-2987.78	-3285.56	-3443.5
			-600.173	-819.769	-923.422	-1124.16	-1971.31	-2488.79	-2786.57	-2944.51
			-219.597	-323.25	-523.985	-1371.14	-1888.62	-2186.4	-2344.33
			-103.653	-304.389	-1151.54	-1669.02	-1966.8	-2124.74
			-200.736	-1047.89	-1565.37	-1863.15	-2021.09
			-847.15	-1364.63	-1662.42	-1820.35
			-517.485	-815.265	-973.199
			-297.78	-455.715
			-157.934
MT#1 (4)			-508.911	-793.79	-1077.69	-2014.23	-2524.47
			-284.878	-568.779	-1505.32	-2015.56
			-283.901	-1220.44	-1730.68
			-936.543	-1446.78
			-510.241
MT#3 (1)			-811.335	-1136.81	-1444.19	-1928.67	-2194.43	-2722.74	-3153.5	-3540.66
			-325.474	-632.854	-1117.33	-1383.09	-1911.4	-2342.16	-2729.32
			-307.379	-791.856	-1057.62	-1585.93	-2016.69	-2403.85
			-484.477	-750.239	-1278.55	-1709.31	-2096.47
			-265.763	-794.071	-1224.83	-1611.99
			-528.308	-959.068	-1346.23
			-430.76	-817.923
			-387.163
MT#3 (2)			795.373	425.971	29.9941	-376.881	105.918	-225.001	-87.3237	596.433	208.433	-105.867	-898.026	-945.24	-1528.24	-1919.76	-2248.54
			-369.402	-765.379	-1172.25	-689.455	-1020.37	-882.697	-198.94	-586.94	-901.241	-1693.4	-1740.61	-2323.62	-2715.13	-3043.91
			-395.977	-802.852	-320.053	-650.972	-513.295	170.462	-217.538	-531.838	-1324	-1371.21	-1954.21	-2345.73	-2674.51
			-406.875	75.9239	-254.995	-117.318	566.439	178.439	-135.861	-928.02	-975.234	-1558.24	-1949.75	-2278.54
			482.799	151.88	289.557	973.314	585.314	271.014	-521.145	-568.359	-1151.36	-1542.88	-1871.66
			-330.919	-193.242	490.515	102.515	-211.785	-1003.94	-1051.16	-1634.16	-2025.68	-2354.46
			137.677	821.434	433.434	119.134	-673.025	-720.239	-1303.24	-1694.76	-2023.54
			683.757	295.757	-18.5435	-810.702	-857.916	-1440.92	-1832.44	-2161.22
			-388	-702.3	-1494.46	-1541.67	-2124.68	-2516.19	-2844.97
			-314.3	-1106.46	-1153.67	-1736.68	-2128.19	-2456.97
			-792.158	-839.373	-1422.37	-1813.89	-2142.67
			-47.2143	-630.217	-1021.73	-1350.52
			-583.002	-974.52	-1303.3
			-391.517	-720.299
			-328.782
MT#3 (3)			105.867	-47.2544	-84.582	84.709	21.082	-170.646	-180.808	-208.485	-152.658	-428.603	-577.758	-428.528	-520.593	-643.798	-599.058	-682.552	-987.302	-1176.25	-1079.5	-1368.15	-2239.7	-2871.82	-3024.41	-3448.62
			-153.122	-190.449	-21.1582	-84.7852	-276.513	-286.676	-314.352	-258.526	-534.47	-683.625	-534.395	-626.461	-749.665	-704.925	-788.419	-1093.17	-1282.12	-1185.37	-1474.02	-2345.56	-2977.68	-3130.28	-3554.49
			-37.3276	131.963	68.3364	-123.391	-133.554	-161.23	-105.404	-381.348	-530.503	-381.273	-473.339	-596.544	-551.803	-635.298	-940.048	-1128.99	-1032.25	-1320.89	-2192.44	-2824.56	-2977.16	-3401.37
			169.291	105.664	-86.0639	-96.2264	-123.903	-68.0765	-344.021	-493.176	-343.946	-436.011	-559.216	-514.476	-597.97	-902.72	-1091.67	-994.918	-1283.57	-2155.11	-2787.23	-2939.83	-3364.04
			-63.627	-255.355	-265.517	-293.194	-237.367	-513.312	-662.467	-513.237	-605.302	-728.507	-683.767	-767.261	-1072.01	-1260.96	-1164.21	-1452.86	-2324.41	-2956.53	-3109.12	-3533.33
			-191.728	-201.89	-229.567	-173.74	-449.685	-598.84	-449.61	-541.675	-664.88	-620.14	-703.634	-1008.38	-1197.33	-1100.58	-1389.23	-2260.78	-2892.9	-3045.5	-3469.7
			-10.1625	-37.8388	17.9874	-257.957	-407.112	-257.882	-349.947	-473.152	-428.412	-511.906	-816.656	-1005.6	-908.854	-1197.5	-2069.05	-2701.17	-2853.77	-3277.98
			-27.6762	28.15	-247.794	-396.949	-247.719	-339.785	-462.99	-418.249	-501.744	-806.493	-995.44	-898.692	-1187.34	-2058.89	-2691.01	-2843.61	-3267.81
			55.8262	-220.118	-369.273	-220.043	-312.109	-435.313	-390.573	-474.067	-778.817	-967.764	-871.015	-1159.66	-2031.21	-2663.33	-2815.93	-3240.14
			-275.944	-425.099	-275.869	-367.935	-491.14	-446.399	-529.893	-834.643	-1023.59	-926.842	-1215.49	-2087.04	-2719.16	-2871.76	-3295.96
			-149.155	0.0752698	-91.9905	-215.195	-170.455	-253.949	-558.699	-747.645	-650.897	-939.546	-1811.09	-2443.21	-2595.81	-3020.02
			149.23	57.1644	-66.0403	-21.3001	-104.794	-409.544	-598.491	-501.742	-790.391	-1661.94	-2294.06	-2446.66	-2870.87
			-92.0658	-215.27	-170.53	-254.024	-558.774	-747.721	-650.972	-939.621	-1811.17	-2443.29	-2595.89	-3020.1
			-123.205	-78.4645	-161.959	-466.709	-655.655	-558.907	-847.556	-1719.1	-2351.22	-2503.82	-2928.03
			44.7402	-38.754	-343.504	-532.45	-435.702	-724.351	-1595.9	-2228.02	-2380.62	-2804.82
			-83.4942	-388.244	-577.19	-480.442	-769.091	-1640.64	-2272.76	-2425.36	-2849.57
			-304.75	-493.696	-396.948	-685.597	-1557.14	-2189.26	-2341.86	-2766.07
			-188.946	-92.1981	-380.847	-1252.39	-1884.51	-2037.11	-2461.32
			96.7483	-191.901	-1063.45	-1695.57	-1848.17	-2272.37
			-288.649	-1160.2	-1792.32	-1944.91	-2369.12
			-871.548	-1503.67	-1656.27	-2080.47
			-632.12	-784.718	-1208.93
			-152.598	-576.806
			-424.208
MT#3 (5)			-890.084	-1912.59	-2130.44	-2704.5	-3135.33	-3969.95	-3946.18	-4513.1
			-1022.5	-1240.35	-1814.42	-2245.24	-3079.87	-3056.1	-3623.02
			-217.85	-791.916	-1222.74	-2057.37	-2033.59	-2600.51
			-574.066	-1004.89	-1839.52	-1815.74	-2382.66
			-430.826	-1265.45	-1241.68	-1808.6
			-834.626	-810.852	-1377.77
			23.7734	-543.146
			-566.92
MT#3 (6)			-613.194	-504.515	-634.404	-678.18	-624.798	-583.717	-532.227	-283.981	-419.413	-483.602	-386.582	-542.544	-525.796	-619.125	-743.248	-689.969	-738.657	-866.606	-1001.26	-1016.12	-1203.36	-1370.87	-1396.73	-1473.98	-1500.42	-1534.3	-1690.22	-1912	-1935.77	-1799.77	-1868.81	-1770.33	-1890.39	-1967.6	-1906.06	-2042.02	-1960.42	-2066.5	-1981.58	-1854.93	-2039.98	-2154.15	-2159.06	-2252.74	-2611.09
			108.679	-21.2101	-64.9859	-11.6034	29.4777	80.9674	329.214	193.782	129.593	226.613	70.6501	87.3986	-5.93065	-130.054	-76.7749	-125.462	-253.412	-388.064	-402.93	-590.168	-757.674	-783.535	-860.789	-887.224	-921.106	-1077.03	-1298.8	-1322.58	-1186.57	-1255.61	-1157.14	-1277.2	-1354.41	-1292.86	-1428.83	-1347.22	-1453.3	-1368.38	-1241.74	-1426.79	-1540.96	-1545.86	-1639.55	-1997.89
			-129.889	-173.665	-120.282	-79.2013	-27.7116	220.535	85.1028	20.9138	117.934	-38.0288	-21.2803	-114.61	-238.733	-185.454	-234.141	-362.091	-496.743	-511.609	-698.847	-866.353	-892.214	-969.468	-995.903	-1029.79	-1185.71	-1407.48	-1431.26	-1295.25	-1364.29	-1265.81	-1385.88	-1463.09	-1401.54	-1537.51	-1455.9	-1561.98	-1477.06	-1350.42	-1535.47	-1649.63	-1654.54	-1748.22	-2106.57
			-43.7759	9.60668	50.6878	102.177	350.424	214.992	150.803	247.823	91.8602	108.609	15.2794	-108.844	-55.5648	-104.252	-232.202	-366.854	-381.72	-568.958	-736.464	-762.325	-839.579	-866.014	-899.896	-1055.82	-1277.59	-1935.77	-1165.36	-1234.4	-1135.93	-1255.99	-1333.2	-1271.65	-1407.62	-1326.01	-1432.09	-1347.17	-1220.53	-1405.58	-1519.75	-1524.65	-1618.34	-1976.68
			53.3826	94.4636	145.953	394.2	258.768	194.579	291.599	135.636	152.385	59.0553	-65.0681	-11.7889	-60.4765	-188.426	-323.078	-337.944	-525.182	-692.688	-718.549	-795.803	-822.238	-856.12	-1012.04	-1233.82	-1257.59	-1186.57	-1190.62	-1092.15	-1212.21	-1289.42	-1227.88	-1363.84	-1282.24	-1388.32	-1303.4	-1176.75	-1361.8	-1475.97	-1480.88	-1574.56	-1932.91
			41.0811	92.5707	340.817	205.385	141.196	238.216	82.2535	99.002	5.67273	-118.451	-65.1715	-113.859	-241.809	-376.461	-391.326	-578.565	-746.071	-771.932	-849.186	-875.621	-909.503	-1065.42	-1287.2	-1310.98	-1174.97	-1364.29	-1145.53	-1265.59	-1342.81	-1281.26	-1417.22	-1335.62	-1441.7	-1356.78	-1230.13	-1415.19	-1529.35	-1534.26	-1627.94	-1986.29
			51.4897	299.736	164.304	100.115	197.135	41.1724	57.9209	-35.4084	-159.532	-106.253	-154.94	-282.89	-417.542	-432.407	-619.646	-787.152	-813.013	-890.267	-916.702	-950.584	-1106.5	-1328.28	-1352.06	-1216.05	-1285.09	-1135.93	-1306.68	-1383.89	-1322.34	-1458.3	-1376.7	-1482.78	-1397.86	-1271.21	-1456.27	-1570.43	-1575.34	-1669.02	-2027.37
			248.246	112.814	48.6254	145.645	-10.3173	6.43126	-86.898	-211.021	-157.742	-206.43	-334.379	-469.031	-483.897	-671.136	-838.642	-864.502	-941.756	-968.191	-1002.07	-1157.99	-1379.77	-1403.55	-1267.54	-1336.58	-1238.1	-1212.21	-1435.38	-1373.83	-1509.79	-1428.19	-1534.27	-1449.35	-1322.7	-1507.76	-1621.92	-1626.83	-1720.51	-2078.86
			-135.432	-199.621	-102.601	-258.564	-241.815	-335.144	-459.268	-405.989	-454.676	-582.626	-717.278	-732.143	-919.382	-1086.89	-1112.75	-1190	-1216.44	-1250.32	-1406.24	-1628.02	-1651.79	-1515.79	-1584.82	-1486.35	-1606.41	-1342.81	-1622.08	-1758.04	-1676.44	-1782.52	-1697.6	-1570.95	-1756	-1870.17	-1875.08	-1968.76	-2327.11
			-64.189	32.8311	-123.132	-106.383	-199.712	-323.836	-270.557	-319.244	-447.194	-581.846	-596.711	-783.95	-951.456	-977.317	-1054.57	-1081.01	-1114.89	-1270.81	-1492.59	-1516.36	-1380.35	-1449.39	-1350.92	-1470.98	-1548.19	-1322.34	-1622.61	-1541.01	-1647.08	-1562.17	-1435.52	-1620.57	-1734.74	-1739.65	-1833.33	-2191.68
			97.0201	-58.9426	-42.1941	-135.523	-259.647	-206.368	-255.055	-383.005	-517.657	-532.522	-719.761	-887.267	-913.128	-990.382	-1016.82	-1050.7	-1206.62	-1428.4	-1452.17	-1316.16	-1385.2	-1286.73	-1406.79	-1484	-1422.46	-1509.79	-1476.82	-1582.89	-1497.98	-1371.33	-1556.38	-1670.55	-1675.46	-1769.14	-2127.49
			-155.963	-139.214	-232.543	-356.667	-303.388	-352.075	-480.025	-614.677	-629.543	-816.781	-984.287	-1010.15	-1087.4	-1113.84	-1147.72	-1303.64	-1525.42	-1549.19	-1413.18	-1482.22	-1383.75	-1503.81	-1581.02	-1519.48	-1655.44	-1676.44	-1679.91	-1595	-1468.35	-1653.4	-1767.57	-1772.48	-1866.16	-2224.51
			16.7485	-76.5808	-200.704	-147.425	-196.113	-324.062	-458.714	-473.58	-660.818	-828.324	-854.185	-931.439	-957.874	-991.756	-1147.68	-1369.45	-1393.23	-1257.22	-1326.26	-1227.79	-1347.85	-1425.06	-1363.51	-1499.48	-1417.87	-1647.08	-1439.03	-1312.39	-1497.44	-1611.61	-1616.51	-1710.2	-2068.54
			-93.3293	-217.453	-164.173	-212.861	-340.811	-475.463	-490.328	-677.567	-845.073	-870.934	-948.188	-974.623	-1008.5	-1164.43	-1386.2	-1409.98	-1273.97	-1343.01	-1244.53	-1364.6	-1441.81	-1380.26	-1516.23	-1434.62	-1540.7	-1497.98	-1329.14	-1514.19	-1628.35	-1633.26	-1726.94	-2085.29
			-124.123	-70.8442	-119.532	-247.481	-382.133	-396.999	-584.238	-751.744	-777.604	-854.858	-881.293	-915.175	-1071.1	-1292.87	-1316.65	-1180.64	-1249.68	-1151.2	-1271.27	-1348.48	-1286.93	-1422.9	-1341.29	-1447.37	-1362.45	-1468.35	-1420.86	-1535.03	-1539.93	-1633.62	-1991.96
			53.2792	4.59167	-123.358	-258.01	-272.876	-460.114	-627.62	-653.481	-730.735	-757.17	-791.052	-946.973	-1168.75	-1192.53	-1056.52	-1125.56	-1027.08	-1147.14	-1224.36	-1162.81	-1298.77	-1217.17	-1323.25	-1238.33	-1111.68	-1497.44	-1410.9	-1415.81	-1509.49	-1867.84
			-48.6876	-176.637	-311.289	-326.155	-513.393	-680.899	-706.76	-784.014	-810.449	-844.331	-1000.25	-1222.03	-1245.8	-1109.8	-1178.84	-1080.36	-1200.42	-1277.63	-1216.09	-1352.05	-1270.45	-1376.53	-1291.61	-1164.96	-1350.01	-1628.35	-1469.09	-1562.77	-1921.12
			-127.95	-262.602	-277.467	-464.706	-632.212	-658.073	-735.327	-761.762	-795.644	-951.565	-1173.34	-1197.12	-1061.11	-1130.15	-1031.67	-1151.74	-1228.95	-1167.4	-1303.36	-1221.76	-1327.84	-1242.92	-1116.27	-1301.33	-1415.49	-1539.93	-1514.08	-1872.43
			-134.652	-149.518	-336.756	-504.262	-530.123	-607.377	-633.812	-667.694	-823.615	-1045.39	-1069.17	-933.159	-1002.2	-903.723	-1023.79	-1101	-1039.45	-1175.41	-1093.81	-1199.89	-1114.97	-988.325	-1173.38	-1287.54	-1292.45	-1509.49	-1744.48
			-14.8657	-202.104	-369.61	-395.471	-472.725	-499.16	-533.042	-688.963	-910.74	-934.516	-798.507	-867.547	-769.071	-889.134	-966.345	-904.8	-1040.76	-959.16	-1065.24	-980.321	-853.673	-1038.73	-1152.89	-1157.8	-1251.48	-1921.12
			-187.239	-354.745	-380.605	-457.859	-484.294	-518.176	-674.098	-895.875	-919.65	-783.642	-852.681	-754.205	-874.268	-951.48	-889.934	-1025.9	-944.294	-1050.37	-965.455	-838.807	-1023.86	-1138.03	-1142.93	-1236.62	-1594.96
			-167.506	-193.367	-270.621	-297.056	-330.938	-486.859	-708.636	-732.411	-596.403	-665.442	-566.967	-687.029	-764.241	-702.695	-838.658	-757.055	-863.133	-778.216	-651.568	-836.621	-950.788	-955.696	-1049.38	-1407.72
			-25.8609	-103.115	-129.55	-163.432	-319.353	-541.13	-564.905	-428.897	-497.937	-399.461	-519.523	-596.735	-535.19	-671.153	-589.549	-695.627	-610.711	-484.063	-669.115	-783.282	-788.19	-881.872	-1240.22
			-77.2539	-103.689	-137.571	-293.492	-515.269	-539.044	-403.036	-472.076	-373.6	-493.663	-570.874	-509.329	-645.292	-563.689	-669.766	-584.85	-458.202	-643.254	-757.421	-762.329	-856.011	-1214.36
			-26.4352	-60.3172	-216.238	-438.015	-461.791	-325.782	-394.822	-296.346	-416.409	-493.62	-432.075	-568.038	-486.435	-592.512	-507.596	-380.948	-566.001	-680.167	-685.075	-778.757	-1137.1
			-33.882	-189.803	-411.58	-435.355	-299.347	-368.387	-269.911	-389.973	-467.185	-405.64	-541.603	-459.999	-566.077	-481.161	-354.513	-539.565	-653.732	-658.64	-752.322	-1110.67
			-155.921	-377.698	-401.473	-265.465	-334.505	-236.029	-356.091	-433.303	-371.758	-507.721	-426.117	-532.195	-447.279	-320.631	-505.683	-619.85	-624.758	-718.44	-1076.79
			-221.777	-245.552	-109.544	-178.583	-80.1078	-200.17	-277.382	-215.836	-351.8	-270.196	-376.274	-291.357	-164.709	-349.762	-463.929	-468.837	-562.519	-920.866
			-23.7752	112.233	43.1935	141.669	21.6067	-55.605	5.94056	-130.023	-48.4193	-154.497	-69.5804	57.0675	-127.985	-242.152	-247.06	-340.742	-699.089
			136.008	66.9687	165.444	45.3819	-31.8298	29.7158	-106.247	-24.6441	-130.722	-45.8052	80.8427	-104.21	-218.377	-223.285	-316.966	-675.314
			-69.0393	29.4363	-90.6261	-167.838	-106.292	-242.255	-160.652	-266.73	-181.813	-55.1653	-240.218	-354.385	-359.293	-452.974	-811.322
			98.4757	-21.5868	-98.7985	-37.2529	-173.216	-91.6128	-197.691	-112.774	13.874	-171.179	-285.345	-290.253	-383.935	-742.283
			-120.062	-197.274	-135.729	-271.692	-190.088	-296.166	-211.25	-84.6016	-269.654	-383.821	-388.729	-482.411	-840.758
			-77.2117	-15.6661	-151.629	-70.026	-176.104	-91.1871	35.4608	-149.592	-263.758	-268.666	-362.348	-720.696
			61.5456	-74.4176	7.18574	-98.8921	-13.9754	112.673	-72.3802	-186.547	-191.455	-285.137	-643.484
			-135.963	-54.3598	-160.438	-75.521	51.127	-133.926	-248.092	-253	-346.682	-705.03
			81.6033	-24.4746	60.4422	187.09	2.03736	-112.129	-117.037	-210.719	-569.066
			-106.078	-21.1611	105.487	-79.5659	-193.732	-198.64	-292.322	-650.67
			84.9167	211.565	26.5119	-87.6546	-92.5626	-186.244	-544.592
			126.648	-58.4048	-172.571	-177.479	-271.161	-629.509
			-185.053	-299.219	-304.127	-397.809	-756.157
			-114.167	-119.075	-212.756	-571.104
			-4.90802	-98.5899	-456.937
			-93.6819	-452.029
			-358.347
MT#6 (2)			-540.683	-1324.78	-2020.56	-2315.14	-2918.93	-3571.42	-4131.89	-4447.27	-4897.53	-5436.02	-6109.21	-6600.64	-7049.64	-7365.04	-7762.66	-8226.25	-8459.57
			-784.095	-1479.87	-1774.46	-2378.25	-3030.73	-3591.21	-3906.58	-4356.85	-4895.34	-5568.53	-6059.96	-6508.96	-6824.36	-7221.98	-7685.57	-7918.89
			-695.78	-990.361	-1594.15	-2246.64	-2807.12	-3122.49	-3572.76	-4111.24	-4784.44	-5275.86	-5724.87	-6040.26	-6437.89	-6901.47	-7134.79
			-294.581	-898.371	-1550.86	-2111.34	-2426.71	-2876.98	-3415.47	-4088.66	-4580.08	-5029.09	-5344.48	-5742.11	-6205.7	-6439.02
			-603.79	-1256.28	-1816.75	-2132.13	-2582.4	-3120.88	-3794.08	-4285.5	-4734.51	-5049.9	-5447.53	-5911.11	-6144.43
			-652.488	-1212.97	-1528.34	-1978.61	-2517.09	-3190.29	-3681.71	-4130.72	-4446.11	-4843.74	-5307.32	-5540.64
			-560.477	-875.851	-1326.12	-1864.61	-2537.8	-3029.22	-3478.23	-3793.63	-4191.25	-4654.84	-4888.16
			-315.373	-765.64	-1304.13	-1977.32	-2468.75	-2917.75	-3233.15	-3630.77	-4094.36	-4327.68
			-450.267	-988.756	-1661.95	-2153.37	-2602.38	-2917.77	-3315.4	-3778.99	-4012.31
			-538.489	-1211.68	-1703.11	-2152.11	-2467.51	-2865.13	-3328.72	-3562.04
			-673.192	-1164.62	-1613.62	-1929.02	-2326.64	-2790.23	-3023.55
			-491.426	-940.429	-1255.83	-1653.45	-2117.04	-2350.36
			-449.003	-764.401	-1162.02	-1625.61	-1858.93
			-315.398	-713.02	-1176.61	-1409.93
			-397.622	-861.211	-1094.53
			-463.589	-696.909
			-233.32
MT#6 (3)			-200.805	-362.006	-480.465	-606.583	-1028.33	-1213.17
			-161.201	-279.66	-405.778	-827.523	-1012.36
			-118.459	-244.577	-666.322	-851.16
			-126.118	-547.863	-732.701
			-421.745	-606.583
			-184.838
MT#6 (4)			95.25	89.8026	-317.5	-382.321	-516.853	-413.969	-431.847	-741.211	-833.4	-1302.14	-1369.67	-1508.38	-1983.8	-2175.05	-2289.53	-2510.06	-2413.21	-2612.97	-3118.94	-3266.55	-3362.5	-3501.72	-3604.71	-3912.34	-4117.72	-4529.69
			-5.44744	-412.75	-477.571	-612.103	-509.219	-527.097	-836.461	-928.65	-1397.39	-1464.92	-1603.63	-2079.05	-2270.3	-2384.78	-2605.31	-2508.46	-2708.22	-3214.19	-3361.8	-3457.75	-3596.97	-3699.96	-4007.59	-4212.97	-4624.94
			-407.303	-472.123	-606.655	-503.772	-521.649	-831.014	-923.202	-1391.94	-1459.48	-1598.18	-2073.61	-2264.85	-2379.33	-2599.86	-2503.01	-2702.77	-3208.75	-3356.35	-3452.31	-3591.53	-3694.51	-4002.14	-4207.52	-4619.49
			-64.8206	-199.353	-96.4694	-114.347	-423.711	-515.9	-984.637	-1052.17	-1190.88	-1666.3	-1857.55	-1972.03	-2192.56	-2095.71	-2295.47	-2801.44	-2949.05	-3045	-3184.22	-3287.21	-3594.84	-3800.22	-4212.19
			-134.532	-31.6487	-49.5261	-358.891	-451.079	-919.817	-987.352	-1126.06	-1601.48	-1792.73	-1907.2	-2127.74	-2030.89	-2230.65	-2736.62	-2884.23	-2980.18	-3119.4	-3222.39	-3530.02	-3735.4	-4147.37
			102.883	85.0059	-224.359	-316.547	-785.285	-852.821	-991.523	-1466.95	-1658.2	-1772.67	-1993.21	-1896.36	-2096.12	-2602.09	-2749.7	-2845.65	-2984.87	-3087.86	-3395.49	-3600.87	-4012.84
			-17.8773	-327.242	-419.43	-888.168	-955.704	-1094.41	-1569.83	-1761.08	-1875.56	-2096.09	-1999.24	-2199	-2704.97	-2852.58	-2948.53	-3087.75	-3190.74	-3498.37	-3703.75	-4115.72
			-309.365	-401.553	-870.29	-937.826	-1076.53	-1551.96	-1743.2	-1857.68	-2078.21	-1981.36	-2181.12	-2687.1	-2834.7	-2930.66	-3069.88	-3172.86	-3480.5	-3685.87	-4097.84
			-92.1885	-560.926	-628.462	-767.164	-1242.59	-1433.84	-1548.31	-1768.85	-1672	-1871.76	-2377.73	-2525.34	-2621.29	-2760.51	-2863.5	-3171.13	-3376.51	-3788.48
			-468.737	-536.273	-674.976	-1150.4	-1341.65	-1456.13	-1676.66	-1579.81	-1779.57	-2285.54	-2433.15	-2529.1	-2668.32	-2771.31	-3078.94	-3284.32	-3696.29
			-67.5359	-206.238	-681.666	-872.912	-987.388	-1207.92	-1111.07	-1310.83	-1816.81	-1964.41	-2060.37	-2199.59	-2302.57	-2610.2	-2815.58	-3227.55
			-138.703	-614.13	-805.376	-919.852	-1140.38	-1043.54	-1243.3	-1749.27	-1896.88	-1992.83	-2132.05	-2235.04	-2542.67	-2748.05	-3160.02
			-475.428	-666.673	-781.149	-1001.68	-904.833	-1104.59	-1610.57	-1758.17	-1854.13	-1993.35	-2096.33	-2403.97	-2609.34	-3021.32
			-191.245	-305.722	-526.254	-429.405	-629.166	-1135.14	-1282.75	-1378.7	-1517.92	-1620.91	-1928.54	-2133.92	-2545.89
			-114.476	-335.009	-238.16	-437.92	-943.894	-1091.5	-1187.45	-1326.68	-1429.66	-1737.29	-1942.67	-2354.64
			-220.533	-123.684	-323.444	-829.418	-977.024	-1072.98	-1212.2	-1315.18	-1622.82	-1828.19	-2240.17
			96.849	-102.911	-608.885	-756.491	-852.445	-991.666	-1094.65	-1402.28	-1607.66	-2019.63
			-199.76	-705.734	-853.34	-949.295	-1088.52	-1191.5	-1499.13	-1704.51	-2116.48
			-505.974	-653.58	-749.534	-888.755	-991.74	-1299.37	-1504.75	-1916.72
			-147.606	-243.561	-382.782	-485.766	-793.4	-998.777	-1410.75
			-95.9545	-235.175	-338.16	-645.793	-851.17	-1263.14
			-139.221	-242.205	-549.839	-755.216	-1167.19
			-102.985	-410.618	-615.995	-1027.97
			-307.633	-513.01	-924.983
			-205.377	-617.349
			-411.972
MT#6 (5)			-628.618	-269.408	141.99	-1036.63	-1105.79	-1595.42	-1526.64	-1706.84	-1980.24	-1886.39	-2069.85	-2180.6	-2069.85	-2187.07	-2228.16	-2162.73	-2178.75	-2341.76	-2404.84	-2435.04	-2341.76	-2768.81	-2855.56	-3034.91	-2921.69	-3124.59	-3114.09	-3013.74	-2947.97	-3285.47	-3167.53	-3076.48	-3337.53	-3842.27	-3809.07	-4000.25	-4456.32	-4673.19	-4477.2	-4583.45	-4786.25	-4769.9	-4809.68	-4940.98	-4965.7	-4973.01	-4878.04
			359.21	770.608	-408.009	-477.176	-966.8	-898.026	-1078.22	-1351.63	-1257.77	-1441.23	-1551.99	-1441.23	-1558.45	-1599.54	-1534.11	-1550.14	-1713.15	-1776.22	-1806.42	-1713.15	-2140.19	-2226.94	-2406.29	-2293.07	-2495.98	-2485.47	-2385.12	-2319.35	-2656.86	-2538.91	-2447.86	-2708.91	-3213.66	-3180.46	-3371.63	-3827.71	-4044.57	-3848.58	-3954.83	-4157.64	-4141.28	-4181.06	-4312.36	-4337.09	-4344.39	-4249.43	-4495.05
			411.398	-767.219	-836.386	-1326.01	-1257.24	-1437.43	-1710.84	-1616.98	-1800.44	-1911.2	-1800.44	-1917.66	-1958.75	-1893.32	-1909.35	-2072.36	-2135.43	-2165.63	-2072.36	-2499.4	-2586.15	-2765.5	-2652.28	-2855.19	-2844.68	-2744.33	-2678.56	-3016.07	-2898.12	-2807.07	-3068.12	-3572.87	-3539.67	-3730.84	-4186.92	-4403.78	-4207.79	-4314.04	-4516.85	-4500.49	-4540.27	-4671.57	-4696.3	-4703.6	-4608.64	-4854.26	-4809.4
			-1178.62	-1247.78	-1737.41	-1668.63	-1848.83	-2122.23	-2028.38	-2211.84	-2322.59	-2211.84	-2329.06	-2370.15	-2304.72	-2320.74	-2483.75	-2546.83	-2577.03	-2483.75	-2910.8	-2997.55	-3176.9	-3063.68	-3266.58	-3256.08	-3155.73	-2947.97	-3427.46	-3309.52	-3218.47	-3479.52	-3984.27	-3951.06	-4142.24	-4598.32	-4815.18	-4619.19	-4725.44	-4928.24	-4911.89	-4951.67	-5082.97	-5107.69	-5115	-5020.03	-5265.66	-5220.8	-5714.27
			-69.1672	-558.791	-490.017	-670.213	-943.617	-849.762	-1033.22	-1143.98	-1033.22	-1150.44	-1191.54	-1126.11	-1142.13	-1305.14	-1368.21	-1398.41	-1305.14	-1732.18	-1818.93	-1998.28	-1885.06	-2087.97	-2077.46	-1977.12	-1911.34	-2656.86	-2130.9	-2039.85	-2300.9	-2805.65	-2772.45	-2963.62	-3419.7	-3636.56	-3440.57	-3546.82	-3749.63	-3733.28	-3773.05	-3904.35	-3929.08	-3936.38	-3841.42	-4087.04	-4042.18	-4535.66	-4578.91
			-489.624	-420.85	-601.046	-874.449	-780.595	-964.053	-1074.81	-964.053	-1081.27	-1122.37	-1056.94	-1072.96	-1235.97	-1299.05	-1329.25	-1235.97	-1663.02	-1749.77	-1929.11	-1815.9	-2018.8	-2008.3	-1907.95	-1842.17	-2179.68	-2898.12	-1970.68	-2231.73	-2736.48	-2703.28	-2894.45	-3350.53	-3567.39	-3371.41	-3477.66	-3680.46	-3664.11	-3703.89	-3835.18	-3859.91	-3867.21	-3772.25	-4017.87	-3973.02	-4466.49	-4509.74	-4449.73
			68.7742	-111.422	-384.825	-290.97	-474.429	-585.186	-474.429	-591.648	-632.745	-567.314	-583.336	-746.347	-809.422	-839.623	-746.347	-1173.39	-1260.14	-1439.49	-1326.27	-1529.18	-1518.67	-1418.32	-1352.55	-1690.06	-1572.11	-3218.47	-1742.11	-2246.86	-2213.66	-2404.83	-2860.91	-3077.77	-2881.78	-2988.03	-3190.84	-3174.48	-3214.26	-3345.56	-3370.29	-3377.59	-3282.63	-3528.25	-3483.39	-3976.87	-4020.12	-3960.11	-4023.7
			-180.196	-453.6	-359.745	-543.203	-653.96	-543.203	-660.422	-701.519	-636.089	-652.11	-815.121	-878.196	-908.397	-815.121	-1242.17	-1328.92	-1508.26	-1395.05	-1597.95	-1587.45	-1487.1	-1421.32	-1758.83	-1640.89	-1549.83	-2300.9	-2315.63	-2282.43	-2473.6	-2929.68	-3146.54	-2950.56	-3056.81	-3259.61	-3243.26	-3283.04	-3414.33	-3439.06	-3446.36	-3351.4	-3597.02	-3552.17	-4045.64	-4088.89	-4028.88	-4092.48	-4200.43
			-273.404	-179.549	-363.007	-473.764	-363.007	-480.226	-521.323	-455.893	-471.914	-634.925	-698	-728.201	-634.925	-1061.97	-1148.72	-1328.07	-1214.85	-1417.75	-1407.25	-1306.9	-1241.13	-1578.63	-1460.69	-1369.64	-1630.69	-2736.48	-2102.23	-2293.41	-2749.49	-2966.35	-2770.36	-2876.61	-3079.41	-3063.06	-3102.84	-3234.14	-3258.86	-3266.17	-3171.2	-3416.83	-3371.97	-3865.44	-3908.69	-3848.68	-3912.28	-4020.23	-4157.98
			93.8549	-89.6036	-200.36	-89.6036	-206.823	-247.919	-182.489	-198.51	-361.521	-424.597	-454.798	-361.521	-788.568	-875.316	-1054.66	-941.447	-1144.35	-1133.85	-1033.5	-967.723	-1305.23	-1187.29	-1096.23	-1357.28	-1862.03	-2213.66	-2020	-2476.08	-2692.94	-2496.96	-2603.21	-2806.01	-2789.66	-2829.44	-2960.73	-2985.46	-2992.76	-2897.8	-3143.42	-3098.57	-3592.04	-3635.29	-3575.28	-3638.88	-3746.83	-3884.58	-4038.04
			-183.459	-294.215	-183.459	-300.677	-341.774	-276.344	-292.365	-455.376	-518.452	-548.653	-455.376	-882.423	-969.171	-1148.52	-1035.3	-1238.21	-1227.7	-1127.35	-1061.58	-1399.08	-1281.14	-1190.09	-1451.14	-1955.89	-1922.69	-2473.6	-2569.94	-2786.8	-2590.81	-2697.06	-2899.87	-2883.51	-2923.29	-3054.59	-3079.32	-3086.62	-2991.66	-3237.28	-3192.42	-3685.9	-3729.14	-3669.14	-3732.73	-3840.68	-3978.43	-4131.89	-4339.28
			-110.757	0	-117.219	-158.316	-92.8853	-108.907	-271.918	-334.993	-365.194	-271.918	-698.964	-785.712	-965.061	-851.843	-1054.75	-1044.24	-943.896	-878.12	-1215.63	-1097.68	-1006.63	-1267.68	-1772.43	-1739.23	-1930.4	-2749.49	-2603.34	-2407.35	-2513.6	-2716.41	-2700.06	-2739.83	-2871.13	-2895.86	-2903.16	-2808.2	-3053.82	-3008.96	-3502.44	-3545.69	-3485.68	-3549.28	-3657.22	-3794.97	-3948.43	-4155.83	-4374.46
			110.757	-6.46243	-47.5591	17.8712	1.84993	-161.161	-224.237	-254.437	-161.161	-588.208	-674.956	-854.305	-741.087	-943.99	-933.487	-833.139	-767.363	-1104.87	-986.927	-895.872	-1156.92	-1661.67	-1628.47	-1819.64	-2275.72	-2692.94	-2296.6	-2402.85	-2605.65	-2589.3	-2629.08	-2760.37	-2785.1	-2792.4	-2697.44	-2943.06	-2898.21	-3391.68	-3434.93	-3374.92	-3438.52	-3546.47	-3684.22	-3837.68	-4045.07	-4263.71	-4295.15
			-117.219	-158.316	-92.8853	-108.907	-271.918	-334.993	-365.194	-271.918	-698.964	-785.712	-965.061	-851.843	-1054.75	-1044.24	-943.896	-878.12	-1215.63	-1097.68	-1006.63	-1267.68	-1772.43	-1739.23	-1930.4	-2386.48	-2603.34	-2590.81	-2513.6	-2716.41	-2700.06	-2739.83	-2871.13	-2895.86	-2903.16	-2808.2	-3053.82	-3008.96	-3502.44	-3545.69	-3485.68	-3549.28	-3657.22	-3794.97	-3948.43	-4155.83	-4374.46	-4405.91	-4645.93
			-41.0967	24.3337	8.31236	-154.699	-217.774	-247.975	-154.699	-581.745	-668.493	-847.842	-734.624	-937.528	-927.025	-826.677	-760.901	-1098.41	-980.464	-889.409	-1150.46	-1655.21	-1622.01	-1813.18	-2269.26	-2486.12	-2290.13	-2513.6	-2599.19	-2582.84	-2622.61	-2753.91	-2778.64	-2785.94	-2690.98	-2936.6	-2891.74	-3385.22	-3428.47	-3368.46	-3432.06	-3540	-3677.75	-3831.21	-4038.61	-4257.25	-4288.69	-4528.72	-4508.65
			65.4304	49.409	-113.602	-176.677	-206.878	-113.602	-540.649	-627.397	-806.746	-693.528	-896.431	-885.928	-785.58	-719.804	-1057.31	-939.368	-848.313	-1109.37	-1614.11	-1580.91	-1772.09	-2228.16	-2445.02	-2249.04	-2355.29	-2605.65	-2541.74	-2581.52	-2712.81	-2737.54	-2744.84	-2649.88	-2895.5	-2850.65	-3344.12	-3387.37	-3327.36	-3390.96	-3498.91	-3636.66	-3790.12	-3997.51	-4216.15	-4247.59	-4487.62	-4467.55
			-16.0213	-179.032	-242.108	-272.309	-179.032	-606.079	-692.827	-872.176	-758.958	-961.862	-951.359	-851.01	-785.234	-1122.74	-1004.8	-913.743	-1174.8	-1679.54	-1646.34	-1837.52	-2293.59	-2510.45	-2314.47	-2420.72	-2623.52	-2700.06	-2646.95	-2778.25	-2802.97	-2810.27	-2715.31	-2960.93	-2916.08	-3409.55	-3452.8	-3392.79	-3456.39	-3564.34	-3702.09	-3855.55	-4062.94	-4281.58	-4313.02	-4553.05	-4532.98
			-163.011	-226.086	-256.287	-163.011	-590.058	-676.806	-856.155	-742.937	-945.84	-935.337	-834.989	-769.213	-1106.72	-988.777	-897.722	-1158.77	-1663.52	-1630.32	-1821.49	-2277.57	-2494.43	-2298.45	-2404.7	-2607.5	-2591.15	-2622.61	-2762.22	-2786.95	-2794.25	-2699.29	-2944.91	-2900.06	-3393.53	-3436.78	-3376.77	-3440.37	-3548.32	-3686.07	-3839.53	-4046.92	-4265.56	-4297	-4537.03	-4516.96
			-63.0755	-93.2765	0	-427.047	-513.795	-693.144	-579.926	-782.829	-772.326	-671.978	-606.202	-943.709	-825.766	-734.711	-995.763	-1500.51	-1467.31	-1658.48	-2114.56	-2331.42	-2135.44	-2241.69	-2444.49	-2428.14	-2467.92	-2712.81	-2623.94	-2631.24	-2536.28	-2781.9	-2737.04	-3230.52	-3273.77	-3213.76	-3277.36	-3385.31	-3523.05	-3676.51	-3883.91	-4102.55	-4133.99	-4374.02	-4353.95
			-30.201	63.0755	-363.971	-450.719	-630.068	-516.85	-719.754	-709.251	-608.903	-543.127	-880.633	-762.69	-671.635	-932.688	-1437.43	-1404.23	-1595.41	-2051.49	-2268.35	-2072.36	-2178.61	-2381.41	-2365.06	-2404.84	-2536.14	-2802.97	-2568.17	-2473.2	-2718.83	-2673.97	-3167.44	-3210.69	-3150.68	-3214.28	-3322.23	-3459.98	-3613.44	-3820.83	-4039.47	-4070.91	-4310.94	-4290.87
			93.2765	-333.77	-420.518	-599.867	-486.649	-689.553	-679.05	-578.702	-512.926	-850.432	-732.489	-641.434	-902.487	-1407.23	-1374.03	-1565.21	-2021.28	-2238.15	-2042.16	-2148.41	-2351.21	-2334.86	-2374.64	-2505.94	-2530.66	-2794.25	-2443	-2688.63	-2643.77	-3137.24	-3180.49	-3120.48	-3184.08	-3292.03	-3429.78	-3583.24	-3790.63	-4009.27	-4040.71	-4280.74	-4260.67
			-427.047	-513.795	-693.144	-579.926	-782.829	-772.326	-671.978	-606.202	-943.709	-825.766	-734.711	-995.763	-1500.51	-1467.31	-1658.48	-2114.56	-2331.42	-2135.44	-2241.69	-2444.49	-2428.14	-2467.92	-2599.21	-2623.94	-2631.24	-2536.28	-2781.9	-2737.04	-3230.52	-3273.77	-3213.76	-3277.36	-3385.31	-3523.05	-3676.51	-3883.91	-4102.55	-4133.99	-4374.02	-4353.95
			-86.7479	-266.097	-152.879	-355.782	-345.28	-244.931	-179.155	-516.662	-398.719	-307.664	-568.716	-1073.46	-1040.26	-1231.44	-1687.51	-1904.37	-1708.39	-1814.64	-2017.44	-2001.09	-2040.87	-2172.17	-2196.89	-2204.2	-2109.23	-2718.83	-2310	-2803.47	-2846.72	-2786.71	-2850.31	-2958.26	-3096.01	-3249.47	-3456.86	-3675.5	-3706.94	-3946.97	-3926.9
			-179.349	-66.1311	-269.035	-258.532	-158.183	-92.4075	-429.914	-311.971	-220.916	-481.969	-986.716	-953.515	-1144.69	-1600.77	-1817.63	-1621.64	-1727.89	-1930.69	-1914.34	-1954.12	-2085.42	-2110.14	-2117.45	-2022.49	-2268.11	-2643.77	-2716.72	-2759.97	-2699.97	-2763.56	-2871.51	-3009.26	-3162.72	-3370.11	-3588.75	-3620.2	-3860.22	-3840.15
			113.218	-89.6855	-79.1827	21.1657	86.9415	-250.565	-132.622	-41.567	-302.62	-807.367	-774.166	-965.34	-1421.42	-1638.28	-1442.29	-1548.54	-1751.35	-1734.99	-1774.77	-1906.07	-1930.8	-1938.1	-1843.14	-2088.76	-2043.9	-3230.52	-2580.62	-2520.62	-2584.21	-2692.16	-2829.91	-2983.37	-3190.76	-3409.4	-3440.85	-3680.87	-3660.8
			-202.903	-192.401	-92.0522	-26.2764	-363.783	-245.84	-154.785	-415.837	-920.585	-887.384	-1078.56	-1534.63	-1751.5	-1555.51	-1661.76	-1864.56	-1848.21	-1887.99	-2019.29	-2044.01	-2051.32	-1956.35	-2201.98	-2157.12	-2650.59	-2846.72	-2633.83	-2697.43	-2805.38	-2943.13	-3096.59	-3303.98	-3522.62	-3554.06	-3794.09	-3774.02
			10.5029	110.851	176.627	-160.879	-42.9363	48.1186	-212.934	-717.681	-684.48	-875.654	-1331.73	-1548.59	-1352.61	-1458.86	-1661.66	-1645.31	-1685.09	-1816.38	-1841.11	-1848.41	-1753.45	-1999.07	-1954.22	-2447.69	-2490.94	-2699.97	-2494.53	-2602.48	-2740.23	-2893.69	-3101.08	-3319.72	-3351.16	-3591.19	-3571.12
			100.348	166.124	-171.382	-53.4392	37.6157	-223.437	-728.184	-694.983	-886.157	-1342.23	-1559.1	-1363.11	-1469.36	-1672.16	-1655.81	-1695.59	-1826.89	-1851.61	-1858.92	-1763.95	-2009.58	-1964.72	-2458.19	-2501.44	-2441.43	-2584.21	-2612.98	-2750.73	-2904.19	-3111.58	-3330.22	-3361.66	-3601.69	-3581.62
			65.7758	-271.731	-153.788	-62.7327	-323.785	-828.532	-795.331	-986.506	-1442.58	-1659.44	-1463.46	-1569.71	-1772.51	-1756.16	-1795.94	-1927.24	-1951.96	-1959.26	-1864.3	-2109.92	-2065.07	-2558.54	-2601.79	-2541.78	-2605.38	-2805.38	-2851.08	-3004.54	-3211.93	-3430.57	-3462.01	-3702.04	-3681.97
			-337.507	-219.563	-128.509	-389.561	-894.308	-861.107	-1052.28	-1508.36	-1725.22	-1529.23	-1635.48	-1838.29	-1821.94	-1861.71	-1993.01	-2017.74	-2025.04	-1930.08	-2175.7	-2130.84	-2624.32	-2667.57	-2607.56	-2671.16	-2779.1	-2740.23	-3070.31	-3277.71	-3496.34	-3527.79	-3767.82	-3747.75
			117.943	208.998	-52.0546	-556.802	-523.601	-714.775	-1170.85	-1387.71	-1191.73	-1297.98	-1500.78	-1484.43	-1524.21	-1655.5	-1680.23	-1687.53	-1592.57	-1838.19	-1793.34	-2286.81	-2330.06	-2270.05	-2333.65	-2441.6	-2579.35	-2904.19	-2940.2	-3158.84	-3190.28	-3430.31	-3410.24
			91.0549	-169.998	-674.745	-641.544	-832.718	-1288.79	-1505.66	-1309.67	-1415.92	-1618.72	-1602.37	-1642.15	-1773.45	-1798.17	-1805.48	-1710.51	-1956.14	-1911.28	-2404.75	-2448	-2387.99	-2451.59	-2559.54	-2697.29	-2850.75	-3211.93	-3276.78	-3308.22	-3548.25	-3528.18
			-261.053	-765.8	-732.599	-923.773	-1379.85	-1596.71	-1400.73	-1506.98	-1709.78	-1693.43	-1733.2	-1864.5	-1889.23	-1896.53	-1801.57	-2047.19	-2002.33	-2495.81	-2539.06	-2479.05	-2542.65	-2650.59	-2788.34	-2941.8	-3149.2	-3496.34	-3399.28	-3639.31	-3619.24
			-504.747	-471.546	-662.72	-1118.8	-1335.66	-1139.67	-1245.92	-1448.73	-1432.37	-1472.15	-1603.45	-1628.18	-1635.48	-1540.52	-1786.14	-1741.28	-2234.76	-2278.01	-2218	-2281.59	-2389.54	-2527.29	-2680.75	-2888.14	-3106.78	-3190.28	-3378.25	-3358.19
			33.2009	-157.973	-614.05	-830.911	-634.926	-741.176	-943.979	-927.628	-967.405	-1098.7	-1123.43	-1130.73	-1035.77	-1281.39	-1236.53	-1730.01	-1773.26	-1713.25	-1776.85	-1884.8	-2022.54	-2176	-2383.4	-2602.04	-2633.48	-3548.25	-2853.44
			-191.174	-647.251	-864.112	-668.126	-774.377	-977.179	-960.829	-1000.61	-1131.9	-1156.63	-1163.93	-1068.97	-1314.59	-1269.74	-1763.21	-1806.46	-1746.45	-1810.05	-1918	-2055.75	-2209.21	-2416.6	-2635.24	-2666.68	-2906.71	-3619.24
			-456.077	-672.938	-476.952	-583.203	-786.005	-769.655	-809.432	-940.729	-965.456	-972.759	-877.796	-1123.42	-1078.56	-1572.04	-1615.29	-1555.28	-1618.87	-1726.82	-1864.57	-2018.03	-2225.42	-2444.06	-2475.51	-2715.53	-2695.46
			-216.861	-20.8755	-127.126	-329.928	-313.578	-353.355	-484.653	-509.379	-516.682	-421.719	-667.342	-622.484	-1115.96	-1159.21	-1099.2	-1162.8	-1270.75	-1408.49	-1561.95	-1769.35	-1987.99	-2019.43	-2259.46	-2239.39
			195.986	89.7349	-113.067	-96.7167	-136.494	-267.792	-292.518	-299.821	-204.858	-450.481	-405.623	-899.097	-942.347	-882.338	-945.936	-1053.88	-1191.63	-1345.09	-1552.49	-1771.13	-1802.57	-2042.6	-2022.53
			-106.251	-309.053	-292.702	-332.479	-463.777	-488.504	-495.807	-400.844	-646.467	-601.609	-1095.08	-1138.33	-1078.32	-1141.92	-1249.87	-1387.62	-1541.08	-1748.47	-1967.11	-1998.55	-2238.58	-2218.51
			-202.802	-186.452	-226.229	-357.526	-382.253	-389.556	-294.593	-540.216	-495.358	-988.832	-1032.08	-972.073	-1035.67	-1143.62	-1281.37	-1434.83	-1642.22	-1860.86	-1892.3	-2132.33	-2112.26
			16.3507	-23.4264	-154.724	-179.451	-186.754	-91.7909	-337.414	-292.556	-786.03	-829.28	-769.271	-832.869	-940.817	-1078.57	-1232.03	-1439.42	-1658.06	-1689.5	-1929.53	-1909.46
			-39.7771	-171.075	-195.801	-203.104	-108.142	-353.764	-308.907	-802.381	-845.63	-785.622	-849.22	-957.167	-1094.92	-1248.38	-1455.77	-1674.41	-1705.85	-1945.88	-1925.81
			-131.298	-156.024	-163.327	-68.3646	-313.987	-269.13	-762.604	-805.853	-745.845	-809.442	-917.39	-1055.14	-1208.6	-1415.99	-1634.63	-1666.08	-1906.1	-1886.03
			-24.7267	-32.0295	62.9332	-182.69	-137.832	-631.306	-674.556	-614.547	-678.145	-786.092	-923.841	-1077.3	-1284.69	-1503.33	-1534.78	-1774.8	-1754.74
			-7.30281	87.6599	-157.963	-113.105	-606.579	-649.829	-589.82	-653.418	-761.366	-899.115	-1052.58	-1259.97	-1478.61	-1510.05	-1750.08	-1730.01
			94.9627	-150.66	-105.802	-599.276	-642.526	-582.517	-646.115	-754.063	-891.812	-1045.27	-1252.67	-1471.3	-1502.75	-1742.77	-1722.71
			-245.623	-200.765	-694.239	-737.489	-677.48	-741.078	-849.026	-986.775	-1140.24	-1347.63	-1566.27	-1597.71	-1837.74	-1817.67
			44.8578	-448.616	-491.866	-431.857	-495.455	-603.403	-741.152	-894.612	-1102.01	-1320.64	-1352.09	-1592.11	-1572.05
			-493.474	-536.724	-476.715	-540.313	-648.261	-786.01	-939.47	-1146.86	-1365.5	-1396.95	-1636.97	-1616.9
			-43.2497	16.7591	-46.8388	-154.787	-292.536	-445.996	-653.389	-872.028	-903.471	-1143.5	-1123.43
			60.0088	-3.58912	-111.537	-249.286	-402.746	-610.139	-828.778	-860.222	-1100.25	-1080.18
			-63.5979	-171.546	-309.295	-462.755	-670.148	-888.787	-920.231	-1160.26	-1140.19
			-107.948	-245.697	-399.157	-606.55	-825.189	-856.633	-1096.66	-1076.59
			-137.749	-291.209	-498.602	-717.242	-748.685	-988.712	-968.643
			-153.46	-360.853	-579.493	-610.936	-850.963	-830.894
			-207.393	-426.032	-457.475	-697.502	-677.434
			-218.639	-250.083	-490.109	-470.041
			-31.4433	-271.47	-251.401
			-240.027	-219.958
			20.0688
MT#6 (6)			-484.643	-857.838	-1200.22	-1460.85	-1587.5	-1841.5	-2132.93	-2560.95	-3009.73	-3412.5
			-373.195	-715.574	-976.202	-1102.86	-1356.86	-1648.29	-2076.31	-2525.08	-2927.85
			-342.379	-603.007	-729.662	-983.662	-1275.09	-1703.11	-2151.89	-2554.66
			-260.628	-387.283	-641.283	-932.712	-1360.73	-1809.51	-2212.28
			-126.655	-380.655	-672.084	-1100.1	-1548.88	-1951.65
			-254	-545.429	-973.448	-1422.23	-1825
			-291.429	-719.448	-1168.23	-1571
			-428.019	-876.797	-1279.57
			-448.778	-851.549
			-402.771
MT#6 (7)			141.99	-200.805	-561.715	-993.932	-1705.36	-1534.55	-1734.38	-1889.33	-2385.48	-2252.24	-2305.54	-1892.79	-2051.75
			-342.795	-703.705	-1135.92	-1847.35	-1676.54	-1876.37	-2031.32	-2527.47	-2394.23	-2447.53	-2034.78	-2193.74
			-360.91	-793.128	-1504.56	-1333.74	-1533.57	-1688.52	-2184.67	-2051.43	-2104.74	-1691.99	-1850.94
			-432.217	-1143.65	-972.832	-1172.66	-1327.61	-1823.76	-1690.52	-1743.82	-1331.08	-1490.03
			-711.43	-540.615	-740.443	-895.393	-1391.55	-1258.3	-1311.61	-898.858	-1057.82
			170.815	-29.0133	-183.963	-680.117	-546.875	-600.178	-187.428	-346.386
			-199.829	-354.778	-850.933	-717.69	-770.993	-358.243	-517.201
			-154.95	-651.104	-517.861	-571.164	-158.415	-317.372
			-496.154	-362.912	-416.215	-3.46494	-162.423
			133.243	79.9398	492.69	333.732
			-53.303	359.447	200.489
			412.75	253.792
			-158.958
	N	0	467	437	407	377	348	319	293	269	246	227	209	193	177	161	147	135	126	118	111	105	99	93	87	81	75	70	66	63	60	57	54	51	48	45	42	39	36	33	30	28	26	24	22	20	18	16	15
	Average	0	-204.376	-402.056	-581.275	-745.117	-890.231	-1007.24	-1116.04	-1211.08	-1290.87	-1365.37	-1420.99	-1476.33	-1498.44	-1480.52	-1453.15	-1397.24	-1390.95	-1377.52	-1412.52	-1485.34	-1560.29	-1631.27	-1689.66	-1756.04	-1809.42	-2096.44	-1928.11	-2014.87	-2099.77	-2184.14	-2279.46	-2389.51	-2506.18	-2618.5	-2725.59	-2846.38	-2976.97	-3122.59	-3278.94	-3402.21	-3530.38	-3669.87	-3826.92	-4003.49	-4203.77	-4390.87	-4500.6
	SD	0	297.679	480.137	650.112	816.595	973.814	1099.06	1221.03	1338.91	1419.28	1506.26	1580.3	1637.48	1648.55	1612.85	1536.71	1408.27	1293.08	1080.76	992.063	994.627	996.848	1006.39	1009.33	999.686	957.559	924.349	879.683	891.258	897.946	910.668	923.763	927.057	931.518	967.747	1000.4	1031.68	1051.93	1048.97	1017.74	1014.75	982.648	930.011	864.714	746.373	555.621	376.775	420.356
	SEM	0	13.7749	22.9681	32.2248	42.0568	52.2019	61.5358	71.3335	81.6347	90.4898	99.974	109.312	117.868	123.913	127.11	126.746	121.205	115.197	99.4916	94.1625	97.0657	100.187	104.358	108.211	111.076	110.569	110.481	108.281	112.288	115.924	120.621	125.708	129.814	134.453	144.263	154.365	165.201	175.322	182.602	185.813	191.77	192.713	189.838	184.358	166.894	130.961	94.1938	108.536
	Time	0	1	2	3	4	5	6	7	8	9	10	11	12	13	14	15	16	17	18	19	20	21	22	23	24	25	26	27	28	29	30	31	32	33	34	35	36	37	38	39	40	41	42	43	44	45	46	47
[truncated: 51 more columns]

## Sheet: Cin8NLEg5-N522G
	Molecules	34											MD
			-518.899	-1155.03	-1677.38	-2146.94	-2234.02
MT#2 (6)			-636.127	-1158.48	-1628.05	-1715.12
			-522.35	-991.918	-1078.99
			-469.568	-556.644
			-87.0754
MT#2 (5)			-322.362	-508.437	-635.354	-783.366	-1079.71	-1271.59	-1566.86	-2117	-2313.28	-2753.61	-2841.34	-2923.76	-3094.92	-3100.71	-3563.61	-3650.96	-3752.47	-4135.31	-4350.68	-4709.71	-5302.4	-5540.69	-6287.59	-6427.45	-6869.78	-7543.88	-7803.19	-8179.17	-8602.02	-8916.74	-8919.22
			-186.075	-312.992	-461.004	-757.346	-949.224	-1244.5	-1794.64	-1990.92	-2431.25	-2518.98	-2601.4	-2772.56	-2778.35	-3241.25	-3328.6	-3430.11	-3812.95	-4028.32	-4387.35	-4980.04	-5218.33	-5965.23	-6105.09	-6547.41	-7221.51	-7480.83	-7856.81	-8279.66	-8594.37	-8596.86
			-126.917	-274.928	-571.271	-763.149	-1058.42	-1608.57	-1804.85	-2245.18	-2332.9	-2415.32	-2586.49	-2592.27	-3055.17	-3142.52	-3244.03	-3626.87	-3842.25	-4201.28	-4793.97	-5032.26	-5779.15	-5919.02	-6361.34	-7035.44	-7294.76	-7670.73	-8093.59	-8408.3	-8410.79
			-148.012	-444.354	-636.232	-931.508	-1481.65	-1677.93	-2118.26	-2205.98	-2288.41	-2459.57	-2465.36	-2928.26	-3015.61	-3117.12	-3499.95	-3715.33	-4074.36	-4667.05	-4905.34	-5652.24	-5792.1	-6234.42	-6908.52	-7167.84	-7543.82	-8602.02	-8281.38	-8283.87
			-296.343	-488.221	-783.496	-1333.64	-1529.92	-1970.25	-2057.97	-2140.39	-2311.56	-2317.35	-2780.25	-2867.59	-2969.1	-3351.94	-3567.32	-3926.35	-4519.04	-4757.33	-5504.23	-5644.09	-6086.41	-6760.51	-7019.83	-7395.8	-7818.66	-8594.37	-8135.86
			-191.878	-487.154	-1037.3	-1233.58	-1673.91	-1761.63	-1844.05	-2015.22	-2021	-2483.9	-2571.25	-2672.76	-3055.6	-3270.97	-3630.01	-4222.69	-4460.98	-5207.88	-5347.75	-5790.07	-6464.17	-6723.48	-7099.46	-7522.32	-7837.03	-8410.79
			-295.275	-845.418	-1041.7	-1482.03	-1569.75	-1652.17	-1823.34	-1829.13	-2292.03	-2379.37	-2480.88	-2863.72	-3079.1	-3438.13	-4030.82	-4269.11	-5016	-5155.87	-5598.19	-6272.29	-6531.61	-6907.58	-7330.44	-7645.15	-7647.64
			-550.143	-746.423	-1186.75	-1274.48	-1356.9	-1528.06	-1533.85	-1996.75	-2084.1	-2185.61	-2568.45	-2783.82	-3142.85	-3735.54	-3973.83	-4720.73	-4860.59	-5302.92	-5977.01	-6236.33	-6612.31	-7035.16	-7349.87	-7352.36
			-196.28	-636.61	-724.334	-806.755	-977.92	-983.707	-1446.61	-1533.96	-1635.47	-2018.3	-2233.68	-2592.71	-3185.4	-3423.69	-4170.59	-4310.45	-4752.77	-5426.87	-5686.19	-6062.17	-6485.02	-6799.73	-6802.22
			-440.33	-528.054	-610.475	-781.64	-787.427	-1250.33	-1337.67	-1439.18	-1822.02	-2037.4	-2396.43	-2989.12	-3227.41	-3974.31	-4114.17	-4556.49	-5230.59	-5489.91	-5865.88	-6288.74	-6603.45	-6605.94
			-87.7238	-170.145	-341.31	-347.097	-809.997	-897.345	-998.855	-1381.69	-1597.07	-1956.1	-2548.79	-2787.08	-3533.98	-3673.84	-4116.16	-4790.26	-5049.58	-5425.55	-5848.41	-6163.12	-6165.61
			-82.4208	-253.586	-259.373	-722.273	-809.621	-911.131	-1293.97	-1509.34	-1868.38	-2461.06	-2699.35	-3446.25	-3586.11	-4028.44	-4702.54	-4961.85	-5337.83	-5760.68	-6075.4	-6077.88
			-171.165	-176.952	-639.852	-727.2	-828.71	-1211.55	-1426.92	-1785.95	-2378.64	-2616.93	-3363.83	-3503.69	-3946.02	-4620.12	-4879.43	-5255.41	-5678.26	-5992.98	-5995.46
			-5.78739	-468.687	-556.035	-657.545	-1040.38	-1255.76	-1614.79	-2207.48	-2445.77	-3192.67	-3332.53	-3774.85	-4448.95	-4708.27	-5084.25	-5507.1	-5821.81	-5824.3
			-462.9	-550.248	-651.758	-1034.6	-1249.97	-1609	-2201.69	-2439.98	-3186.88	-3326.74	-3769.06	-4443.16	-4702.48	-5078.46	-5501.31	-5816.02	-5818.51
			-87.3482	-188.858	-571.696	-787.071	-1146.1	-1738.79	-1977.08	-2723.98	-2863.84	-3306.17	-3980.26	-4239.58	-4615.56	-5038.41	-5353.12	-5355.61
			-101.51	-484.348	-699.723	-1058.75	-1651.44	-1889.73	-2636.63	-2776.49	-3218.82	-3892.92	-4152.23	-4528.21	-4951.06	-5265.78	-5268.26
			-382.838	-598.213	-957.244	-1549.93	-1788.22	-2535.12	-2674.98	-3117.31	-3791.41	-4050.72	-4426.7	-4849.55	-5164.27	-5166.75
			-215.375	-574.406	-1167.1	-1405.38	-2152.28	-2292.15	-2734.47	-3408.57	-3667.88	-4043.86	-4466.72	-4781.43	-4783.92
			-359.032	-951.72	-1190.01	-1936.91	-2076.77	-2519.09	-3193.19	-3452.51	-3828.49	-4251.34	-4566.05	-4568.54
			-592.689	-830.979	-1577.88	-1717.74	-2160.06	-2834.16	-3093.48	-3469.46	-3892.31	-4207.02	-4209.51
			-238.29	-985.188	-1125.05	-1567.37	-2241.47	-2500.79	-2876.77	-3299.62	-3614.33	-3616.82
			-746.898	-886.761	-1329.08	-2003.18	-2262.5	-2638.48	-3061.33	-3376.04	-3378.53
			-139.863	-582.186	-1256.28	-1515.6	-1891.58	-2314.43	-2629.15	-2631.63
			-442.323	-1116.42	-1375.74	-1751.72	-2174.57	-2489.28	-2491.77
			-674.099	-933.416	-1309.39	-1732.25	-2046.96	-2049.45
			-259.317	-635.294	-1058.15	-1372.86	-1375.35
			-375.977	-798.831	-1113.54	-1116.03
			-422.854	-737.567	-740.054
			-314.713	-317.2
			-2.48682
MT#2 (4)			-502.012	-862.525	-1221.45
			-360.514	-719.435
			-358.921
MT#2 (3)			-412.75	-642.104	-476.25	-386.255	-382.321	-401.609	-635.793	-539.75	-699.221	-898.026	-803.846	-903.063	-1115.32	-1303.3	-1405.99	-1563.83	-1634.43	-1760.34	-1851.33
			-229.354	-63.5	26.4946	30.4294	11.1407	-223.043	-127	-286.471	-485.276	-391.096	-490.313	-702.575	-890.548	-993.241	-1151.08	-1221.68	-1347.59	-1438.58
			165.854	255.849	259.783	240.495	6.31076	102.354	-57.1172	-255.922	-161.742	-260.959	-473.221	-661.194	-763.887	-921.725	-992.327	-1118.23	-1209.22
			89.9946	93.9294	74.6407	-159.543	-63.5	-222.971	-421.776	-327.596	-426.813	-639.075	-827.048	-929.741	-1087.58	-1158.18	-1284.09	-1375.08
			3.93479	-15.3538	-249.538	-153.495	-312.966	-511.77	-417.59	-516.807	-729.069	-917.042	-1019.74	-1177.57	-1248.18	-1374.08	-1465.07
			-19.2886	-253.473	-157.429	-316.901	-515.705	-421.525	-520.742	-733.004	-920.977	-1023.67	-1181.51	-1252.11	-1378.02	-1469.01
			-234.184	-138.141	-297.612	-496.416	-402.237	-501.454	-713.715	-901.689	-1004.38	-1162.22	-1232.82	-1358.73	-1449.72
			96.0433	-63.428	-262.232	-168.053	-267.27	-479.531	-667.505	-770.198	-928.035	-998.638	-1124.54	-1215.53
			-159.471	-358.276	-264.096	-363.313	-575.575	-763.548	-866.241	-1024.08	-1094.68	-1220.59	-1311.58
			-198.804	-104.625	-203.842	-416.103	-604.077	-706.77	-864.607	-935.21	-1061.12	-1152.11
			94.1798	-5.03727	-217.299	-405.272	-507.965	-665.803	-736.406	-862.311	-953.302
			-99.2171	-311.479	-499.452	-602.145	-759.983	-830.585	-956.491	-1047.48
			-212.262	-400.235	-502.928	-660.766	-731.368	-857.273	-948.264
			-187.973	-290.666	-448.504	-519.107	-645.012	-736.003
			-102.693	-260.531	-331.133	-457.039	-548.029
			-157.838	-228.44	-354.345	-445.336
			-70.6028	-196.508	-287.499
			-125.905	-216.896
			-90.9909
MT#2 (2)			-386.255	-889.567	-1143.44	-1461.88	-1556.07	-1653.75	-1748.85	-1968.76	-2034.23
			-503.311	-757.185	-1075.62	-1169.82	-1267.49	-1362.59	-1582.5	-1647.98
			-253.874	-572.313	-666.507	-764.179	-859.279	-1079.19	-1144.66
			-318.439	-412.633	-510.304	-605.405	-825.315	-890.79
			-94.1942	-191.866	-286.966	-506.876	-572.351
			-97.6714	-192.772	-412.682	-478.157
			-95.1005	-315.011	-380.486
			-219.91	-285.385
			-65.4752
MT#2 (1)			-349.25	-571.5	-903.063	-1023.91	-1307.93	-1400.24	-1469.1	-1697.36	-1845.87	-2146.36	-2492.93	-2650.7	-2721.25	-2973.33	-3103.23	-3387	-3190.84	-3170.23	-3099.49	-3285.63	-3485.28	-3776.65	-3674.51	-3832.29	-3804.31	-3797.41	-3930.47	-3969.64
			-222.25	-553.813	-674.657	-958.68	-1050.99	-1119.85	-1348.11	-1496.62	-1797.11	-2143.68	-2301.45	-2372	-2624.08	-2753.98	-3037.75	-2841.59	-2820.98	-2750.24	-2936.38	-3136.03	-3427.4	-3325.26	-3483.04	-3455.06	-3448.16	-3581.22	-3620.39
			-331.563	-452.407	-736.43	-828.743	-897.602	-1125.86	-1274.37	-1574.86	-1921.43	-2079.2	-2149.75	-2401.83	-2531.73	-2815.5	-2619.34	-2598.73	-2527.99	-2714.13	-2913.78	-3205.15	-3103.01	-3260.79	-3232.81	-3225.91	-3358.97	-3398.14
			-120.844	-404.868	-497.181	-566.04	-794.301	-942.811	-1243.29	-1589.87	-1747.63	-1818.19	-2070.27	-2200.16	-2483.93	-2287.77	-2267.17	-2196.43	-2382.56	-2582.21	-2873.59	-2771.44	-2929.23	-2901.24	-2894.35	-3027.4	-3066.58
			-284.024	-376.337	-445.196	-673.457	-821.967	-1122.45	-1469.02	-1626.79	-1697.35	-1949.43	-2079.32	-2363.09	-2166.93	-2146.33	-2075.58	-2261.72	-2461.37	-2752.74	-2650.6	-2808.39	-2780.4	-2773.5	-2906.56	-2945.73
			-92.3129	-161.172	-389.433	-537.944	-838.426	-1185	-1342.77	-1413.32	-1665.4	-1795.3	-2079.07	-1882.91	-1862.3	-1791.56	-1977.7	-2177.35	-2468.72	-2366.57	-2524.36	-2496.38	-2489.48	-2622.53	-2661.71
			-68.859	-297.12	-445.631	-746.113	-1092.69	-1250.45	-1321.01	-1573.09	-1702.98	-1986.75	-1790.59	-1769.99	-1699.25	-1885.38	-2085.03	-2376.41	-2274.26	-2432.05	-2404.06	-2397.17	-2530.22	-2569.4
			-228.261	-376.772	-677.254	-1023.83	-1181.59	-1252.15	-1504.23	-1634.13	-1917.89	-1721.73	-1701.13	-1630.39	-1816.52	-2016.17	-2307.55	-2205.4	-2363.19	-2335.2	-2328.31	-2461.36	-2500.54
			-148.511	-448.993	-795.568	-953.334	-1023.89	-1275.97	-1405.86	-1689.63	-1493.47	-1472.87	-1402.13	-1588.26	-1787.91	-2079.29	-1977.14	-2134.93	-2106.94	-2100.05	-2233.1	-2272.28
			-300.482	-647.057	-804.823	-875.381	-1127.46	-1257.35	-1541.12	-1344.96	-1324.36	-1253.62	-1439.75	-1639.4	-1930.77	-1828.63	-1986.42	-1958.43	-1951.54	-2084.59	-2123.76
			-346.575	-504.341	-574.898	-826.976	-956.871	-1240.64	-1044.48	-1023.88	-953.133	-1139.27	-1338.92	-1630.29	-1528.15	-1685.94	-1657.95	-1651.06	-1784.11	-1823.28
			-157.766	-228.324	-480.402	-610.296	-894.066	-697.904	-677.303	-606.559	-792.695	-992.346	-1283.72	-1181.57	-1339.36	-1311.38	-1304.48	-1437.53	-1476.71
			-70.5575	-322.636	-452.53	-736.3	-540.138	-519.537	-448.792	-634.929	-834.579	-1125.95	-1023.81	-1181.59	-1153.61	-1146.71	-1279.77	-1318.94
			-252.078	-381.973	-665.743	-469.581	-448.979	-378.235	-564.372	-764.022	-1055.39	-953.251	-1111.04	-1083.05	-1076.16	-1209.21	-1248.38
			-129.895	-413.665	-217.503	-196.901	-126.157	-312.294	-511.944	-803.316	-701.172	-858.959	-830.974	-824.079	-957.133	-996.306
			-283.77	-87.608	-67.0064	3.73795	-182.399	-382.049	-673.421	-571.278	-729.065	-701.08	-694.184	-827.238	-866.411
			196.162	216.763	287.508	101.371	-98.2792	-389.651	-287.508	-445.295	-417.31	-410.414	-543.468	-582.642
			20.6016	91.3459	-94.791	-294.441	-585.813	-483.67	-641.457	-613.472	-606.576	-739.63	-778.803
			70.7443	-115.393	-315.043	-606.415	-504.271	-662.058	-634.073	-627.178	-760.231	-799.405
			-186.137	-385.787	-677.159	-575.016	-732.803	-704.818	-697.922	-830.976	-870.149
			-199.65	-491.022	-388.879	-546.666	-518.681	-511.785	-644.839	-684.012
			-291.372	-189.229	-347.015	-319.031	-312.135	-445.189	-484.362
			102.144	-55.6433	-27.6584	-20.7627	-153.817	-192.99
			-157.787	-129.802	-122.906	-255.96	-295.134
			27.9849	34.8806	-98.1733	-137.347
			6.89571	-126.158	-165.332
			-133.054	-172.227
			-39.1736
MT#1 (2)			-688.69	-1518.2	-2480.67	-3480.39	-4158.67	-5453.8	-6494.45	-7219.64	-7912.38	-8504.75	-9432.38	-10316.4	-11077.1	-11386.2
			-829.512	-1791.98	-2791.7	-3469.98	-4765.11	-5805.76	-6530.95	-7223.69	-7816.06	-8743.69	-9627.68	-10388.4	-10697.5
			-962.468	-1962.19	-2640.47	-3935.59	-4976.25	-5701.43	-6394.18	-6986.55	-7914.18	-8798.17	-9558.91	-9868.01
			-999.724	-1678.01	-2973.13	-4013.78	-4738.97	-5431.71	-6024.08	-6951.71	-7835.7	-8596.44	-8905.55
			-678.282	-1973.4	-3014.05	-3739.24	-4431.99	-5024.36	-5951.99	-6835.98	-7596.72	-7905.82
			-1295.12	-2335.77	-3060.96	-3753.7	-4346.07	-5273.71	-6157.69	-6918.44	-7227.54
			-1040.65	-1765.84	-2458.58	-3050.95	-3978.59	-4862.57	-5623.31	-5932.42
			-725.188	-1417.93	-2010.3	-2937.94	-3821.92	-4582.66	-4891.77
			-692.743	-1285.11	-2212.75	-3096.73	-3857.48	-4166.58
			-592.371	-1520	-2403.99	-3164.73	-3473.84
			-927.633	-1811.62	-2572.36	-2881.47
			-883.986	-1644.73	-1953.83
			-760.742	-1069.85
			-309.105
MT#3 (1)			-720.824	-1121.99	-1631.98	-2098.17	-2816.35	-3408.05	-4171.72	-4680.13	-5271.56	-5568.76
			-401.165	-911.161	-1377.35	-2095.53	-2687.23	-3450.9	-3959.31	-4550.74	-4847.94
			-509.995	-976.18	-1694.36	-2286.06	-3049.74	-3558.15	-4149.57	-4446.77
			-466.184	-1184.37	-1776.07	-2539.74	-3048.15	-3639.58	-3936.78
			-718.184	-1309.88	-2073.56	-2581.97	-3173.39	-3470.59
			-591.701	-1355.37	-1863.78	-2455.21	-2752.41
			-763.671	-1272.08	-1863.51	-2160.71
			-508.41	-1099.84	-1397.04
			-591.427	-888.626
			-297.199
			-128.738	-254	-257.518	-113.978	-805.409	-1228.44	-1398.44	-1843.45	-2963.97	-2921.69	-2944.95	-2860.32	-2967	-2626.08	-2521.99
MT#3 (2)			-125.262	-128.78	14.7597	-676.671	-1099.7	-1269.7	-1714.71	-2835.23	-2792.95	-2816.21	-2731.58	-2838.26	-2497.34	-2393.25
			-3.51755	140.022	-551.409	-974.437	-1144.44	-1589.45	-2709.97	-2667.69	-2690.95	-2606.32	-2713	-2372.08	-2267.99
			143.539	-547.891	-970.92	-1140.92	-1585.93	-2706.45	-2664.17	-2687.43	-2602.8	-2709.48	-2368.56	-2264.47
			-691.431	-1114.46	-1284.46	-1729.47	-2849.99	-2807.71	-2830.97	-2746.34	-2853.02	-2512.1	-2408.01
			-423.028	-593.034	-1038.04	-2158.56	-2116.28	-2139.54	-2054.91	-2161.59	-1820.67	-1716.58
			-170.005	-615.01	-1735.53	-1693.25	-1716.51	-1631.88	-1738.56	-1397.64	-1293.55
			-445.005	-1565.53	-1523.25	-1546.51	-1461.88	-1568.55	-1227.63	-1123.55
			-1120.52	-1078.24	-1101.5	-1016.87	-1123.55	-782.628	-678.543
			42.2812	19.0226	103.65	-3.02373	337.896	441.981
			-23.2586	61.3693	-45.3049	295.615	399.699
			84.6279	-22.0463	318.873	422.958
			-106.674	234.245	338.33
			340.919	445.004
			104.085
MT#3 (3)			-530.896	-1207.24	-1778.51	-2645.92	-3005.71
			-676.345	-1247.61	-2115.02	-2474.81
			-571.265	-1438.68	-1798.47
			-867.412	-1227.2
			-359.791
MT#3 (4)			-215.767	-890.005	-1121.79	-1439.29	-1566.43
			-674.238	-906.024	-1223.52	-1350.67
			-231.786	-549.286	-676.429
			-317.5	-444.644
			-127.144
MT#3 (5)			-247.724	-76.294	-299.312	-232.791	-165.371	-212.769	-509.768	-677.291	-508.443	-360.408	-494.106	-659.274	-827.939	-1061.68	-1209.47	-1333.67	-1439.29	-1947.41
			171.43	-51.5878	14.9332	82.353	34.9555	-262.044	-429.567	-260.718	-112.684	-246.382	-411.55	-580.215	-813.952	-961.746	-1085.94	-1191.57	-1699.68
			-223.018	-156.497	-89.0771	-136.475	-433.474	-600.997	-432.149	-284.114	-417.812	-582.98	-751.645	-985.382	-1133.18	-1257.37	-1363	-1871.11
			66.5209	133.941	86.5432	-210.456	-377.979	-209.131	-61.0962	-194.794	-359.962	-528.627	-762.364	-910.158	-1034.35	-1139.98	-1648.09
			67.4198	20.0223	-276.977	-444.5	-275.652	-127.617	-261.315	-426.483	-595.148	-828.885	-976.679	-1100.88	-1206.5	-1714.62
			-47.3975	-344.397	-511.92	-343.071	-195.037	-328.735	-493.903	-662.568	-896.305	-1044.1	-1168.3	-1273.92	-1782.04
			-296.999	-464.522	-295.674	-147.639	-281.338	-446.506	-615.17	-848.907	-996.701	-1120.9	-1226.52	-1734.64
			-167.523	1.32533	149.36	15.6615	-149.506	-318.171	-551.908	-699.702	-823.899	-929.523	-1437.64
			168.848	316.883	183.185	18.0168	-150.648	-384.385	-532.179	-656.376	-762	-1270.12
			148.034	14.3362	-150.832	-319.496	-553.233	-701.028	-825.224	-930.848	-1438.96
			-133.698	-298.866	-467.531	-701.268	-849.062	-973.259	-1078.88	-1587
			-165.168	-333.832	-567.569	-715.364	-839.56	-945.185	-1453.3
			-168.664	-402.402	-550.196	-674.392	-780.017	-1288.13
			-233.737	-381.531	-505.728	-611.352	-1119.47
			-147.794	-271.991	-377.615	-885.731
			-124.197	-229.821	-737.936
			-105.624	-613.74
			-508.115
MT#3 (6)			-703.572	-1451.84	-2550.65	-3311.75	-3856.01	-4366.5	-4681.67	-4963.17	-5346.12	-5682.69	-6037.85
			-748.271	-1847.07	-2608.18	-3152.44	-3662.93	-3978.1	-4259.59	-4642.55	-4979.11	-5334.27
			-1098.8	-1859.91	-2404.17	-2914.66	-3229.83	-3511.32	-3894.28	-4230.84	-4586
			-761.109	-1305.36	-1815.86	-2131.02	-2412.52	-2795.48	-3132.04	-3487.2
			-544.254	-1054.75	-1369.91	-1651.41	-2034.37	-2370.93	-2726.09
			-510.492	-825.659	-1107.16	-1490.11	-1826.68	-2181.84
			-315.168	-596.665	-979.62	-1316.18	-1671.34
			-281.497	-664.452	-1001.02	-1356.18
			-382.955	-719.519	-1074.68
			-336.565	-691.724
			-355.16
MT#4 (1)			-339.246	-656.425	-724.551	-682.568
			-317.179	-385.305	-343.322
			-68.1261	-26.143
			41.9831
MT#4 (2)			-360.416	-1209.47	-1992.4	-2797.93	-3328.54	-3562.3	-4176.29	-4640.33	-5103.89	-5610.52	-6035.51	-6565.71	-7178.62	-7814.63
			-849.055	-1631.98	-2437.51	-2968.12	-3201.88	-3815.88	-4279.92	-4743.48	-5250.1	-5675.09	-6205.3	-6818.21	-7454.21
			-782.929	-1588.46	-2119.07	-2352.83	-2966.82	-3430.86	-3894.42	-4401.05	-4826.04	-5356.24	-5969.15	-6605.16
			-805.529	-1336.14	-1569.9	-2183.89	-2647.93	-3111.5	-3618.12	-4043.11	-4573.32	-5186.22	-5822.23
			-530.61	-764.368	-1378.36	-1842.4	-2305.97	-2812.59	-3237.58	-3767.79	-4380.69	-5016.7
			-233.759	-847.753	-1311.79	-1775.36	-2281.98	-2706.97	-3237.18	-3850.08	-4486.09
			-613.995	-1078.04	-1541.6	-2048.22	-2473.21	-3003.42	-3616.33	-4252.33
			-464.041	-927.603	-1434.23	-1859.22	-2389.42	-3002.33	-3638.34
			-463.563	-970.188	-1395.18	-1925.38	-2538.29	-3174.3
			-506.625	-931.613	-1461.82	-2074.73	-2710.73
			-424.988	-955.195	-1568.1	-2204.11
			-530.208	-1143.12	-1779.12
			-612.908	-1248.91
			-636.006
MT#4 (4)			-344.61	-853.292	-1379.85	-2121.88
			-508.682	-1035.24	-1777.27
			-526.56	-1268.59
			-742.03
MT#4 (5)			-1405.99	-2479.75	-3565.06	-4714.42	-6122.73	-7032.89
			-1073.76	-2159.07	-3308.43	-4716.74	-5626.9
			-1085.31	-2234.67	-3642.98	-4553.14
			-1149.36	-2557.67	-3467.83
			-1408.31	-2318.47
			-910.163
MT#5 (1)			-763.18	-1651	-2688.54	-3261.43	-3664.78
			-887.82	-1925.36	-2498.25	-2901.6
			-1037.54	-1610.43	-2013.78
			-572.884	-976.242
			-403.359
MT#5 (3)			-847.638	-811.219	-984.798	-1358.71	-1234.13	-1566.86	255.817	-582.332	-228.953	228.953
			36.419	-137.161	-511.069	-386.496	-719.224	1103.46	265.306	618.685	1076.59
			-173.58	-547.488	-422.915	-755.643	1067.04	228.887	582.266	1040.17
			-373.908	-249.336	-582.063	1240.62	402.466	755.846	1213.75
			124.573	-208.155	1614.52	776.375	1129.75	1587.66
			-332.728	1489.95	651.802	1005.18	1463.09
			1822.68	984.53	1337.91	1795.81
			-838.149	-484.77	-26.8649
			353.379	811.284
			457.905
MT#5 (4)			-577.744	-1164.21	-1822.39	-2731.81	-3450.79	-3979.64	-4593.4	-5249.59	-5588.36	-6330.19	-7006.5	-7239.28	-7853.63
			-586.465	-1244.64	-2154.07	-2873.05	-3401.9	-4015.66	-4671.84	-5010.62	-5752.45	-6428.75	-6661.53	-7275.89
			-658.179	-1567.6	-2286.58	-2815.44	-3429.2	-4085.38	-4424.15	-5165.98	-5842.29	-6075.07	-6689.42
			-909.426	-1628.41	-2157.26	-2771.02	-3427.2	-3765.97	-4507.8	-5184.11	-5416.89	-6031.24
			-718.98	-1247.83	-1861.59	-2517.77	-2856.55	-3598.38	-4274.68	-4507.46	-5121.82
			-528.851	-1142.61	-1798.8	-2137.57	-2879.4	-3555.7	-3788.49	-4402.84
			-613.761	-1269.94	-1608.72	-2350.55	-3026.85	-3259.63	-3873.99
			-656.183	-994.956	-1736.79	-2413.09	-2645.87	-3260.23
			-338.772	-1080.6	-1756.91	-1989.69	-2604.04
			-741.831	-1418.14	-1650.92	-2265.27
			-676.305	-909.086	-1523.44
			-232.782	-847.134
			-614.352
MT#6 (1)			-730.25	-1238.66	-1841.77	-2476.7	-2857.68	-3524.82	-4129.45	-4635.93	-5463.31	-6159.58	-6827.43	-7273.25	-7590.64
			-508.407	-1111.52	-1746.45	-2127.43	-2794.57	-3399.2	-3905.68	-4733.06	-5429.33	-6097.18	-6543	-6860.39
			-603.117	-1238.05	-1619.02	-2286.17	-2890.8	-3397.28	-4224.65	-4920.92	-5588.77	-6034.59	-6351.98
			-634.93	-1015.9	-1683.05	-2287.68	-2794.16	-3621.53	-4317.81	-4985.66	-5431.47	-5748.87
			-380.973	-1048.12	-1652.75	-2159.23	-2986.6	-3682.88	-4350.73	-4796.54	-5113.94
			-667.146	-1271.78	-1778.26	-2605.63	-3301.91	-3969.75	-4415.57	-4732.96
			-604.631	-1111.11	-1938.48	-2634.76	-3302.61	-3748.42	-4065.82
			-506.482	-1333.85	-2030.13	-2697.98	-3143.79	-3461.19
			-827.372	-1523.65	-2191.5	-2637.31	-2954.71
			-696.275	-1364.12	-1809.94	-2127.33
			-667.849	-1113.66	-1431.06
			-445.814	-763.21
			-317.396
MT#6 (3)			-317.5	-699.779	-742.004	-678.61	-783.496	-868.827	-656.552	-995.017	-974.632	-932.251	-1081.37	-1208.17	-551.923	-1190.01	-1378.4	-1566.29	-2011.24	-2545.64	-2859.46	-3051.6	-3389.95	-2949.82	-2628.89	-3136.21	-3472.32	-3940.64
			-382.279	-424.504	-361.11	-465.996	-551.327	-339.052	-677.517	-657.132	-614.751	-763.866	-890.67	-234.423	-872.514	-1060.9	-1248.79	-1693.74	-2228.14	-2541.96	-2734.1	-3072.45	-2632.32	-2311.39	-2818.71	-3154.82	-3623.14
			-42.2253	21.169	-83.717	-169.048	43.2274	-295.238	-274.853	-232.472	-381.587	-508.391	147.856	-490.235	-678.617	-866.512	-1311.46	-1845.86	-2159.68	-2351.82	-2690.17	-2250.04	-1929.11	-2436.43	-2772.55	-3240.86
			63.3944	-41.4917	-126.823	85.4528	-253.013	-232.628	-190.246	-339.362	-466.165	190.081	-448.01	-636.392	-824.287	-1269.23	-1803.64	-2117.46	-2309.6	-2647.95	-2207.81	-1886.89	-2394.21	-2730.32	-3198.64
			-104.886	-190.217	22.0584	-316.407	-296.022	-253.641	-402.756	-529.56	126.687	-511.404	-699.786	-887.681	-1332.63	-1867.03	-2180.85	-2372.99	-2711.34	-2271.21	-1950.28	-2457.6	-2793.71	-3262.03
			-85.331	126.944	-211.521	-191.136	-148.755	-297.87	-424.674	231.573	-406.518	-594.9	-782.795	-1227.74	-1762.15	-2075.97	-2268.11	-2606.45	-2166.32	-1845.39	-2352.72	-2688.83	-3157.15
			212.275	-126.19	-105.805	-63.4237	-212.539	-339.343	316.904	-321.187	-509.569	-697.464	-1142.41	-1676.82	-1990.64	-2182.77	-2521.12	-2080.99	-1760.06	-2267.39	-2603.5	-3071.82
			-338.465	-318.081	-275.699	-424.814	-551.618	104.628	-533.462	-721.845	-909.739	-1354.69	-1889.09	-2202.91	-2395.05	-2733.4	-2293.26	-1972.34	-2479.66	-2815.77	-3284.09
			20.3846	62.7663	-86.349	-213.153	443.094	-194.997	-383.379	-571.274	-1016.22	-1550.63	-1864.45	-2056.58	-2394.93	-1954.8	-1633.87	-2141.2	-2477.31	-2945.63
			42.3817	-106.734	-233.537	422.709	-215.382	-403.764	-591.659	-1036.61	-1571.01	-1884.83	-2076.97	-2415.32	-1975.18	-1654.26	-2161.58	-2497.69	-2966.01
			-149.115	-275.919	380.327	-257.763	-446.146	-634.04	-1078.99	-1613.39	-1927.21	-2119.35	-2457.7	-2017.57	-1696.64	-2203.96	-2540.07	-3008.39
			-126.804	529.443	-108.648	-297.03	-484.925	-929.872	-1464.28	-1778.1	-1970.24	-2308.58	-1868.45	-1547.52	-2054.85	-2390.96	-2859.28
			656.246	18.1559	-170.226	-358.121	-803.068	-1337.47	-1651.29	-1843.43	-2181.78	-1741.65	-1420.72	-1928.04	-2264.15	-2732.47
			-638.091	-826.473	-1014.37	-1459.31	-1993.72	-2307.54	-2499.68	-2838.03	-2397.89	-2076.97	-2584.29	-2920.4	-3388.72
			-188.382	-376.277	-821.224	-1355.63	-1669.45	-1861.59	-2199.94	-1759.8	-1438.88	-1946.2	-2282.31	-2750.63
			-187.895	-632.842	-1167.25	-1481.07	-1673.2	-2011.55	-1571.42	-1250.49	-1757.82	-2093.93	-2562.25
			-444.947	-979.353	-1293.17	-1485.31	-1823.66	-1383.53	-1062.6	-1569.92	-1906.03	-2374.35
			-534.405	-848.224	-1040.36	-1378.71	-938.578	-617.652	-1124.97	-1461.09	-1929.41
			-313.819	-505.957	-844.307	-404.172	-83.2463	-590.569	-926.681	-1395
			-192.139	-530.488	-90.3537	230.572	-276.751	-612.862	-1081.18
			-338.349	101.785	422.711	-84.6117	-420.723	-889.042
			440.134	761.06	253.737	-82.374	-550.693
			320.926	-186.397	-522.508	-990.828
			-507.323	-843.434	-1311.75
			-336.111	-804.431
			-468.319
MT#6 (4)			-59.8984	-127	-446.555	-1004.02	-2076.77	-2415.69	-2676.81	-3299.95	-3497.69	-3501.45
			-67.1016	-386.657	-944.125	-2016.87	-2355.79	-2616.91	-3240.05	-3437.79	-3441.55
			-319.555	-877.023	-1949.77	-2288.69	-2549.81	-3172.95	-3370.69	-3374.45
			-557.468	-1630.21	-1969.13	-2230.25	-2853.39	-3051.14	-3054.89
			-1072.74	-1411.66	-1672.79	-2295.93	-2493.67	-2497.42
			-338.921	-600.044	-1223.18	-1420.93	-1424.68
			-261.122	-884.263	-1082	-1085.76
			-623.14	-820.882	-824.636
			-197.742	-201.496
			-3.75366
MT#6 (5)			-596.101	-1228.44	-1629.92	-2245.31	-2392.76	-3196.49	-3640.77	-4106.47	-4532.87
			-632.336	-1033.82	-1649.21	-1796.66	-2600.39	-3044.67	-3510.37	-3936.77
			-401.481	-1016.87	-1164.32	-1968.05	-2412.33	-2878.04	-3304.43
			-615.389	-762.843	-1566.57	-2010.85	-2476.55	-2902.95
			-147.453	-951.181	-1395.46	-1861.17	-2287.56
			-803.728	-1248.01	-1713.71	-2140.11
			-444.282	-909.984	-1336.38
			-465.702	-892.101
			-426.399
MT#6 (6)			-404.426	-664.682	-1039.15	-1397.16	-1736.87
			-260.256	-634.725	-992.733	-1332.44
			-374.469	-732.477	-1072.19
			-358.008	-697.719
			-339.711
MT#7 (1)			-112.253	-242.841	-206.375	-50.2012	563.059	587.375	1029.43	763.652
			-130.588	-94.1218	62.052	675.312	699.628	1141.68	875.905
			36.4658	192.64	805.9	830.216	1272.27	1006.49
			156.174	769.434	793.75	1235.8	970.027
			613.26	637.576	1079.63	813.853
			24.3158	466.371	200.593
			442.055	176.277
			-265.778
MT#7 (2)			-215.923	-539.049	-693.43	-839.576	-758.852	-866.315	-966.421	-1182.13	-1174.43
			-323.126	-477.507	-623.653	-542.928	-650.392	-750.498	-966.205	-958.505
			-154.381	-300.527	-219.802	-327.266	-427.372	-643.079	-635.379
			-146.145	-65.4211	-172.885	-272.991	-488.698	-480.998
			80.7243	-26.7396	-126.845	-342.552	-334.852
			-107.464	-207.57	-423.276	-415.577
			-100.106	-315.813	-308.113
			-215.707	-208.007
			7.69985
MT#7 (3)			-489.043	-1067.88	-1463.6	-1930.36	-2541.98	-3016.96	-3480.72	-3693.18
			-578.839	-974.56	-1441.32	-2052.94	-2527.92	-2991.68	-3204.14
			-395.721	-862.482	-1474.1	-1949.08	-2412.84	-2625.3
			-466.761	-1078.38	-1553.36	-2017.12	-2229.58
			-611.62	-1086.6	-1550.35	-1762.82
			-474.977	-938.735	-1151.2
			-463.758	-676.221
			-212.463
MT#7 (4)			-222.25	-955.142	-1386.86	-2352.56	-3049.69	-3798.61	-4368.05	-4717.97	-5087.24	-5293.21
			-732.892	-1164.61	-2130.31	-2827.44	-3576.36	-4145.8	-4495.72	-4864.99	-5070.96
			-431.719	-1397.41	-2094.55	-2843.46	-3412.91	-3762.83	-4132.1	-4338.07
			-965.694	-1662.83	-2411.74	-2981.19	-3331.11	-3700.38	-3906.35
			-697.139	-1446.05	-2015.49	-2365.42	-2734.68	-2940.66
			-748.911	-1318.35	-1668.28	-2037.54	-2243.52
			-569.443	-919.368	-1288.63	-1494.61
			-349.925	-719.189	-925.163
			-369.264	-575.237
			-205.974
MT#7 (5)			-448.566	-1093.58	-1658.2	-2089.5	-2911.04	-3420.95	-4197.11	-4440.8	-4796.13
			-645.015	-1209.63	-1640.93	-2462.48	-2972.39	-3748.54	-3992.23	-4347.57
			-564.615	-995.914	-1817.46	-2327.37	-3103.53	-3347.21	-3702.55
			-431.299	-1252.85	-1762.76	-2538.91	-2782.6	-3137.94
			-821.548	-1331.46	-2107.61	-2351.3	-2706.64
			-509.911	-1286.07	-1529.75	-1885.09
			-776.155	-1019.84	-1375.18
			-243.686	-599.024
			-355.338
MT#8 (1)			-701.38	-1272.81	-2232.55	-2932.02	-3487.76
			-571.433	-1531.17	-2230.64	-2786.38
			-959.735	-1659.21	-2214.95
			-699.474	-1255.22
			-555.741
MT#8 (2)			-191.677	-317.5	-449.013	-487.253	-727.317	-910.326	-1082.81	-911.064	-867.791	-937.28	-571.889	-261.817	-320.321	-94.6224	141.99	-128.738	-254.873	-191.677	-318.199	-571.889	-317.5	66.9483	0	63.5	-169.291	-297.049	-190.5	-105.791	-215.792	-275.082	-233.744	-66.9483	-128.738	-299.312	-348.987	-257.497	-233.755	-297.04	-469.892	-360.416	-211.582	-47.2544	-169.291	-254.873	47.4248	170.74	63.5
			-125.823	-257.336	-295.576	-535.64	-718.649	-891.132	-719.387	-676.114	-745.603	-380.212	-70.1402	-128.644	97.0546	333.667	62.9391	-63.1964	0	-126.522	-380.212	-125.823	258.625	191.677	255.177	22.386	-105.372	1.177	85.886	-24.1151	-83.405	-42.0667	124.729	62.9391	-107.635	-157.31	-65.8197	-42.0782	-105.363	-278.215	-168.739	-19.905	144.423	22.386	-63.1964	239.102	362.417	255.177	339.886
			-131.513	-169.753	-409.817	-592.826	-765.309	-593.564	-550.291	-619.78	-254.389	55.6828	-2.82099	222.878	459.49	188.762	62.6266	125.823	-0.699153	-254.389	0	384.448	317.5	381	148.209	20.4509	127	211.709	101.708	42.418	83.7563	250.552	188.762	18.1881	-31.4869	60.0033	83.7448	20.4599	-152.392	-42.9156	105.918	270.246	148.209	62.6266	364.925	488.24	381	465.709	347.404
			-38.24	-278.304	-461.313	-633.796	-462.051	-418.778	-488.268	-122.876	187.196	128.692	354.39	591.003	320.275	194.139	257.336	130.814	-122.876	131.513	515.961	449.013	512.513	279.722	151.964	258.513	343.222	-215.792	173.931	215.269	382.065	320.275	149.701	100.026	191.516	215.258	151.973	-20.8796	88.5972	237.431	401.758	279.722	194.139	496.438	619.753	512.513	597.222	478.917	427.931
			-240.064	-423.073	-595.556	-423.811	-380.538	-450.028	-84.6359	225.436	166.932	392.63	629.243	358.515	232.379	295.576	169.054	-84.6359	169.753	554.201	487.253	550.753	317.962	190.204	296.753	381.462	271.461	-83.405	253.509	420.305	358.515	187.941	138.266	229.756	253.498	190.213	17.3604	126.837	275.671	439.998	317.962	232.379	534.678	657.993	550.753	635.462	517.157	466.171	534.678
			-183.009	-355.492	-183.747	-140.474	-209.963	155.428	465.5	406.996	632.695	869.307	598.579	472.444	535.64	409.118	155.428	409.817	794.265	727.317	790.817	558.026	430.268	536.817	621.526	511.525	452.235	83.7563	660.369	598.579	428.005	378.33	469.82	493.562	430.277	257.425	366.901	515.735	680.063	558.026	472.444	774.742	898.057	790.817	875.526	757.221	706.235	774.742	888.556
			-172.482	-0.737941	42.5351	-26.9543	338.437	648.509	590.005	815.704	1052.32	781.588	655.453	718.649	592.127	338.437	592.826	977.274	910.326	973.826	741.035	613.277	719.826	804.535	694.534	635.244	676.582	382.065	781.588	611.014	561.339	652.829	676.571	613.286	440.434	549.911	698.744	863.072	741.035	655.453	957.751	1081.07	973.826	1058.54	940.231	889.244	957.751	1071.57	96.07
			171.744	215.018	145.528	510.92	820.991	762.488	988.186	1224.8	954.071	827.935	891.132	764.609	510.92	765.309	1149.76	1082.81	1146.31	913.518	785.759	892.309	977.018	867.016	807.727	849.065	1015.86	358.515	783.497	733.822	825.312	849.053	785.768	612.916	722.393	871.227	1035.55	913.518	827.935	1130.23	1253.55	1146.31	1231.02	1112.71	1061.73	1130.23	1244.05	268.552	170.514
			43.2731	-26.2164	339.175	649.247	590.743	816.442	1053.05	782.326	656.191	719.387	592.865	339.175	593.564	978.012	911.064	974.564	741.773	614.015	720.564	805.273	695.272	635.982	677.32	844.116	782.326	428.005	562.077	653.567	677.309	614.024	441.172	550.649	699.482	863.81	741.773	656.191	958.489	1081.8	974.564	1059.27	940.968	889.982	958.489	1072.3	96.808	-1.23054	423.817
			-69.4895	295.902	605.974	547.47	773.169	1009.78	739.053	612.918	676.114	549.592	295.902	550.291	934.739	867.791	931.291	698.5	570.742	677.291	762	651.999	592.709	634.047	800.843	739.053	568.479	561.339	610.294	634.036	570.751	397.899	507.375	656.209	820.537	698.5	612.918	915.216	1038.53	931.291	1016	897.695	846.709	915.216	1029.03	53.5349	-44.5036	380.544	253.638
			365.392	675.463	616.959	842.658	1079.27	808.543	682.407	745.603	619.081	365.392	619.78	1004.23	937.28	1000.78	767.989	640.231	746.78	831.489	721.488	662.198	703.537	870.332	808.543	637.969	588.294	825.312	703.525	640.24	467.388	576.865	725.698	890.026	767.989	682.407	984.705	1108.02	1000.78	1085.49	967.185	916.198	984.705	1098.52	123.024	24.9858	450.033	323.128	191.676
			310.072	251.568	477.266	713.879	443.151	317.015	380.212	253.69	0	254.389	638.837	571.889	635.389	402.598	274.84	381.389	466.098	356.097	296.807	338.145	504.94	443.151	272.577	222.902	314.392	677.309	274.849	101.996	211.473	360.307	524.634	402.598	317.015	619.313	742.629	635.389	720.098	601.793	550.807	619.313	733.128	-242.367	-340.406	84.6414	-42.2642	-173.715	-424.927
			-58.5038	167.195	403.808	133.079	6.94381	70.1402	-56.3819	-310.072	-55.6828	328.765	261.817	325.317	92.5262	-35.2319	71.3172	156.026	46.0251	-13.2648	28.0735	194.869	133.079	-37.4947	-87.1697	4.32055	28.0621	570.751	-208.075	-98.5984	50.2352	214.563	92.5262	6.94381	309.242	432.558	325.317	410.026	291.722	240.735	309.242	423.057	-552.439	-650.477	-225.43	-352.336	-483.787	-734.998	-733.872
			225.699	462.311	191.583	65.4476	128.644	2.12184	-251.568	2.82099	387.269	320.321	383.821	151.03	23.2719	129.821	214.53	104.529	45.239	86.5773	253.373	191.583	21.009	-28.666	62.8243	86.5658	23.2809	467.388	-40.0946	108.739	273.067	151.03	65.4476	367.746	491.061	383.821	468.53	350.225	299.239	367.746	481.56	-493.935	-591.974	-166.926	-293.832	-425.283	-676.495	-675.369	-507.618
			236.613	-34.1155	-160.251	-97.0546	-223.577	-477.266	-222.878	161.571	94.6224	158.122	-74.6686	-202.427	-95.8776	-11.1686	-121.17	-180.46	-139.121	27.6741	-34.1155	-204.69	-254.365	-162.874	-139.133	-202.418	-375.27	211.473	-116.96	47.368	-74.6686	-160.251	142.047	265.363	158.122	242.831	124.527	73.5404	142.047	255.862	-719.634	-817.672	-392.625	-519.531	-650.982	-902.193	-901.067	-733.316	-605.157
			-270.728	-396.864	-333.667	-460.189	-713.879	-459.49	-75.042	-141.99	-78.4903	-311.281	-439.039	-332.49	-247.781	-357.782	-417.072	-375.734	-208.939	-270.728	-441.302	-490.977	-399.487	-375.745	-439.03	-611.883	-502.406	50.2352	-189.245	-311.281	-396.864	-94.5656	28.7501	-78.4903	6.21868	-112.086	-163.072	-94.5656	19.2491	-956.246	-1054.28	-629.238	-756.143	-887.594	-1138.81	-1137.68	-969.929	-841.769	-693.904
			-126.135	-62.9391	-189.461	-443.151	-188.762	195.686	128.738	192.238	-40.5531	-168.311	-61.7621	22.9469	-87.0542	-146.344	-105.006	61.7896	0	-170.574	-220.249	-128.759	-105.017	-168.302	-341.154	-231.678	-82.8441	273.067	-40.5531	-126.135	176.163	299.478	192.238	276.947	158.642	107.656	176.163	289.977	-685.518	-783.557	-358.509	-485.415	-616.866	-868.078	-866.952	-699.201	-571.041	-423.176	-425.205
			63.1964	-63.3258	-317.015	-62.6266	321.822	254.873	318.373	85.5824	-42.1757	64.3734	149.082	39.0813	-20.2086	21.1297	187.925	126.135	-44.4385	-94.1135	-2.62326	21.1182	-42.1667	-215.019	-105.542	43.2914	207.619	-74.6686	0	302.298	425.614	318.373	403.082	284.778	233.791	302.298	416.113	-559.383	-657.421	-232.374	-359.28	-490.731	-741.942	-740.816	-573.065	-444.906	-297.04	-299.069	-381.533
			-126.522	-380.212	-125.823	258.625	191.677	255.177	22.386	-105.372	1.177	85.886	-24.1151	-83.405	-42.0667	124.729	62.9391	-107.635	-157.31	-65.8197	-42.0782	-105.363	-278.215	-168.739	-19.905	144.423	22.386	-396.864	239.102	362.417	255.177	339.886	221.581	170.595	239.102	352.916	-622.579	-720.618	-295.57	-422.476	-553.927	-805.139	-804.013	-636.262	-508.102	-360.237	-362.266	-444.73	-577.632
			-253.69	0.699153	385.147	318.199	381.699	148.908	21.15	127.699	212.408	102.407	43.1172	84.4555	251.251	189.461	18.8872	-30.7878	60.7025	84.444	21.1591	-151.693	-42.2164	106.617	270.945	148.908	63.3258	176.163	488.94	381.699	466.408	348.104	297.117	365.624	479.439	-496.057	-594.095	-169.048	-295.954	-427.405	-678.616	-677.49	-509.74	-381.58	-233.715	-235.743	-318.208	-451.109	-634.534
			254.389	638.837	571.889	635.389	402.598	274.84	381.389	466.098	356.097	296.807	338.145	504.94	443.151	272.577	222.902	314.392	338.134	274.849	101.996	211.473	360.307	524.634	402.598	317.015	619.313	425.614	635.389	720.098	601.793	550.807	619.313	733.128	-242.367	-340.406	84.6414	-42.2642	-173.715	-424.927	-423.801	-256.05	-127.89	19.975	17.9461	-64.518	-197.42	-380.845	-257.933
			384.448	317.5	381	148.209	20.4509	127	211.709	101.708	42.418	83.7563	250.552	188.762	18.1881	-31.4869	60.0033	83.7448	20.4599	-152.392	-42.9156	105.918	270.246	148.209	62.6266	364.925	488.24	255.177	465.709	347.404	296.418	364.925	478.739	-496.756	-594.795	-169.747	-296.653	-428.104	-679.316	-678.19	-510.439	-382.279	-234.414	-236.443	-318.907	-451.809	-635.233	-512.322	-699.38
			-66.9483	-3.44828	-236.239	-363.997	-257.448	-172.739	-282.74	-342.03	-300.692	-133.897	-195.686	-366.26	-415.935	-324.445	-300.703	-363.988	-536.841	-427.364	-278.53	-114.203	-236.239	-321.822	-19.5235	103.792	-3.44828	466.408	-37.0439	-88.0303	-19.5235	94.2912	-881.204	-979.243	-554.196	-681.101	-812.552	-1063.76	-1062.64	-894.887	-766.727	-618.862	-620.891	-703.355	-836.257	-1019.68	-896.77	-1083.83	-1174.83
			63.5	-169.291	-297.049	-190.5	-105.791	-215.792	-275.082	-233.744	-66.9483	-128.738	-299.312	-348.987	-257.497	-233.755	-297.04	-469.892	-360.416	-211.582	-47.2544	-169.291	-254.873	47.4248	170.74	63.5	148.209	601.793	-21.082	47.4248	161.239	-814.256	-912.295	-487.247	-614.153	-745.604	-996.816	-995.69	-827.939	-699.779	-551.914	-553.943	-636.407	-769.309	-952.733	-829.822	-1016.88	-1107.89	-1213.17
			-232.791	-360.549	-254	-169.291	-279.292	-338.582	-297.244	-130.448	-192.238	-362.812	-412.487	-320.997	-297.255	-360.54	-533.392	-423.916	-275.082	-110.754	-232.791	-318.373	-16.0752	107.24	0	84.709	-33.5956	296.418	-16.0752	97.7394	-877.756	-975.795	-550.747	-677.653	-809.104	-1060.32	-1059.19	-891.439	-763.279	-615.414	-617.443	-699.907	-832.809	-1016.23	-893.322	-1080.38	-1171.39	-1276.67	-1174
			-127.758	-21.209	63.5	-46.5011	-105.791	-64.4527	102.343	40.5531	-130.021	-179.696	-88.2057	-64.4642	-127.749	-300.601	-191.125	-42.291	122.037	0	-85.5824	216.716	340.031	232.791	317.5	199.195	148.209	-19.5235	330.53	-644.965	-743.004	-317.956	-444.862	-576.313	-827.525	-826.399	-658.648	-530.488	-382.623	-384.652	-467.116	-600.018	-783.442	-660.531	-847.589	-938.594	-1043.87	-941.208	-1007.04
			106.549	191.258	81.257	21.9671	63.3055	230.101	168.311	-2.26283	-51.9378	39.5525	63.294	0.00904066	-172.843	-63.3665	85.4671	249.795	127.758	42.1757	344.474	467.79	360.549	445.258	326.954	275.967	344.474	161.239	-517.207	-615.246	-190.198	-317.104	-448.555	-699.767	-698.64	-530.89	-402.73	-254.865	-256.894	-339.358	-472.259	-655.684	-532.773	-719.831	-810.836	-916.117	-813.45	-879.278	-715.818
			84.709	-25.2921	-84.582	-43.2437	123.552	61.7621	-108.812	-158.487	-66.9967	-43.2552	-106.54	-279.392	-169.916	-21.082	143.246	21.209	-64.3734	237.925	361.24	254	338.709	220.404	169.418	237.925	351.739	-877.756	-721.795	-296.747	-423.653	-555.104	-806.316	-805.19	-637.439	-509.279	-361.414	-363.443	-445.907	-578.809	-762.233	-639.322	-826.38	-917.385	-1022.67	-919.999	-985.827	-822.367	-869.694
			-110.001	-169.291	-127.953	38.8427	-22.9469	-193.521	-243.196	-151.706	-127.964	-191.249	-364.101	-254.625	-105.791	58.5366	-63.5	-149.082	153.216	276.531	169.291	254	135.695	84.709	153.216	267.03	-708.465	-743.004	-381.456	-508.362	-639.813	-891.025	-889.899	-722.148	-593.988	-446.123	-448.152	-530.616	-663.518	-846.942	-724.031	-911.089	-1002.09	-1107.37	-1004.71	-1070.54	-907.076	-954.403	-741.847
			-59.2899	-17.9516	148.844	87.0542	-83.5199	-133.195	-41.7046	-17.9631	-81.248	-254.1	-144.623	4.2101	168.538	46.5011	-39.0813	263.217	386.532	279.292	364.001	245.696	194.71	263.217	377.032	-598.464	-696.503	-190.198	-398.361	-529.812	-781.024	-779.897	-612.147	-483.987	-336.122	-338.151	-420.615	-553.517	-736.941	-614.03	-801.088	-892.093	-997.374	-894.707	-960.535	-797.075	-844.402	-631.846	-745.137
			41.3383	208.134	146.344	-24.2299	-73.9049	17.5853	41.3268	-21.9581	-194.81	-85.3336	63.5	227.828	105.791	20.2086	322.507	445.822	338.582	423.291	304.986	254	322.507	436.321	-539.174	-637.213	-212.165	-423.653	-470.522	-721.734	-720.608	-552.857	-424.697	-276.832	-278.861	-361.325	-494.227	-677.651	-554.74	-741.798	-832.803	-938.084	-835.417	-901.245	-737.785	-785.112	-572.556	-685.847	-510.57
			166.795	105.006	-65.5683	-115.243	-23.753	-0.0114887	-63.2964	-236.149	-126.672	22.1617	186.489	64.4527	-21.1297	281.168	404.484	297.244	381.953	263.648	212.662	281.168	394.983	-580.512	-678.551	-253.504	-380.409	-639.813	-763.072	-761.946	-594.195	-466.035	-318.17	-320.199	-402.663	-535.565	-718.99	-596.078	-783.136	-874.142	-979.422	-876.756	-942.584	-779.123	-826.451	-613.894	-727.186	-551.909	-466.035
			-61.7896	-232.364	-282.039	-190.548	-166.807	-230.092	-402.944	-293.467	-144.634	19.6939	-102.343	-187.925	114.373	237.689	130.448	215.157	96.8527	45.8663	114.373	228.188	-747.308	-845.346	-420.299	-547.205	-678.656	-781.024	-928.741	-760.99	-632.831	-484.965	-486.994	-569.458	-702.36	-885.785	-762.874	-949.932	-1040.94	-1146.22	-1043.55	-1109.38	-945.919	-993.246	-780.689	-893.981	-718.704	-632.831	-655.43
			-170.574	-220.249	-128.759	-105.017	-168.302	-341.154	-231.678	-82.8441	81.4835	-40.5531	-126.135	176.163	299.478	192.238	276.947	158.642	107.656	176.163	289.977	-685.518	-783.557	-358.509	-485.415	-616.866	-868.078	-720.608	-699.201	-571.041	-423.176	-425.205	-507.669	-640.571	-823.995	-701.084	-888.142	-979.147	-1084.43	-981.762	-1047.59	-884.129	-931.456	-718.9	-832.191	-656.914	-571.041	-593.64	-760.512
			-49.675	41.8153	65.5568	2.27187	-170.58	-61.1036	87.7299	252.058	130.021	44.4385	346.737	470.052	362.812	447.521	329.216	278.23	346.737	460.551	-514.944	-612.983	-187.935	-314.841	-446.292	-697.504	-696.378	-594.195	-400.467	-252.602	-254.631	-337.095	-469.997	-653.421	-530.51	-717.568	-808.573	-913.854	-811.187	-877.016	-713.555	-760.882	-548.326	-661.617	-486.34	-400.467	-423.066	-589.938	-1218.3
			91.4903	115.232	51.9469	-120.905	-11.4286	137.405	301.733	179.696	94.1135	396.412	519.727	412.487	497.196	378.891	327.905	396.412	510.226	-465.269	-563.308	-138.26	-265.166	-396.617	-647.829	-646.703	-478.952	-632.831	-202.927	-204.956	-287.42	-420.322	-603.746	-480.835	-667.893	-758.898	-864.179	-761.513	-827.341	-663.88	-711.207	-498.651	-611.942	-436.665	-350.792	-373.391	-540.263	-1168.63	-836.492
			23.7415	-39.5434	-212.396	-102.919	45.9147	210.242	88.2057	2.62326	304.921	428.237	320.997	405.706	287.401	236.415	304.921	418.736	-556.759	-654.798	-229.751	-356.656	-488.107	-739.319	-738.193	-570.442	-442.282	-423.176	-296.446	-378.91	-511.812	-695.237	-572.325	-759.383	-850.389	-955.669	-853.003	-918.831	-755.37	-802.698	-590.141	-703.433	-528.156	-442.282	-464.882	-631.753	-1260.12	-927.982	-853.003
			-63.2849	-236.137	-126.66	22.1732	186.501	64.4642	-21.1182	281.18	404.496	297.255	381.964	263.66	212.673	281.18	394.995	-580.501	-678.539	-253.492	-380.398	-511.849	-763.06	-761.934	-594.184	-466.024	-318.159	-254.631	-402.652	-535.553	-718.978	-596.067	-783.125	-874.13	-979.411	-876.744	-942.572	-779.112	-826.439	-613.883	-727.174	-551.897	-466.024	-488.623	-655.495	-1283.86	-951.723	-876.744	-748.075
			-172.852	-63.3755	85.4581	249.786	127.749	42.1667	344.465	467.78	360.54	445.249	326.944	275.958	344.465	458.28	-517.216	-615.255	-190.207	-317.113	-448.564	-699.776	-698.649	-530.899	-402.739	-254.874	-256.903	-287.42	-472.269	-655.693	-532.782	-719.84	-810.845	-916.126	-813.459	-879.287	-715.827	-763.154	-550.598	-663.889	-488.612	-402.739	-425.338	-592.21	-1220.57	-888.438	-813.459	-684.79	-676.77
			109.477	258.31	422.638	300.601	215.019	517.317	640.633	533.392	618.101	499.797	448.81	517.317	631.132	-344.364	-442.402	-17.3549	-144.261	-275.712	-526.923	-525.797	-358.046	-229.887	-82.0213	-84.0502	-166.514	-511.812	-482.841	-359.93	-546.987	-637.993	-743.273	-640.607	-706.435	-542.975	-590.302	-377.745	-491.037	-315.76	-229.887	-252.486	-419.358	-1047.72	-715.586	-640.607	-511.938	-503.918	-145.354
			148.834	313.161	191.125	105.542	407.84	531.156	423.916	508.625	390.32	339.334	407.84	521.655	-453.841	-551.879	-126.832	-253.737	-385.188	-636.4	-635.274	-467.523	-339.364	-191.498	-193.527	-275.991	-408.893	-718.978	-469.406	-656.464	-747.47	-852.75	-750.084	-815.912	-652.451	-699.779	-487.222	-600.514	-425.237	-339.364	-361.963	-528.834	-1157.2	-825.063	-750.084	-621.415	-613.395	-254.831
			164.328	42.291	-43.2914	259.007	382.322	275.082	359.791	241.486	190.5	259.007	372.821	-602.674	-700.713	-275.665	-402.571	-534.022	-785.234	-784.108	-616.357	-488.197	-340.332	-342.361	-424.825	-557.727	-741.151	-532.782	-805.298	-896.303	-1001.58	-898.917	-964.745	-801.285	-848.612	-636.056	-749.347	-574.07	-488.197	-510.796	-677.668	-1306.03	-973.896	-898.917	-770.248	-762.228	-403.664
			-122.037	-207.619	94.6792	217.995	110.754	195.463	77.1588	26.1724	94.6792	208.494	-767.002	-865.04	-439.993	-566.899	-698.35	-949.561	-948.435	-780.684	-652.525	-504.659	-506.688	-589.152	-722.054	-905.479	-782.567	-546.987	-1060.63	-1165.91	-1063.25	-1129.07	-965.613	-1012.94	-800.383	-913.675	-738.398	-652.525	-675.124	-841.996	-1470.36	-1138.22	-1063.25	-934.576	-926.556	-567.992
			-85.5824	216.716	340.031	232.791	317.5	199.195	148.209	216.716	330.53	-644.965	-743.004	-317.956	-444.862	-576.313	-827.525	-826.399	-658.648	-530.488	-382.623	-384.652	-467.116	-600.018	-783.442	-660.531	-847.589	-747.47	-1043.87	-941.208	-1007.04	-843.576	-890.903	-678.347	-791.638	-616.361	-530.488	-553.087	-719.959	-1348.32	-1016.19	-941.208	-812.539	-804.519	-445.955
			302.298	425.614	318.373	403.082	284.778	233.791	302.298	416.113	-559.383	-657.421	-232.374	-359.28	-490.731	-741.942	-740.816	-573.065	-444.906	-297.04	-299.069	-381.533	-514.435	-697.86	-574.948	-762.006	-853.012	-1001.58	-855.626	-921.454	-757.994	-805.321	-592.764	-706.056	-530.779	-444.906	-467.505	-634.377	-1262.74	-930.605	-855.626	-726.957	-718.937	-360.373
			123.316	16.0752	100.784	-17.5204	-68.5068	0	113.815	-861.681	-959.719	-534.672	-661.578	-793.029	-1044.24	-1043.11	-875.363	-747.204	-599.338	-601.367	-683.831	-816.733	-1000.16	-877.247	-1064.3	-1155.31	-1260.59	-1063.25	-1223.75	-1060.29	-1107.62	-895.062	-1008.35	-833.077	-747.204	-769.803	-936.675	-1565.04	-1232.9	-1157.92	-1029.26	-1021.23	-662.671
			-107.24	-22.5314	-140.836	-191.822	-123.316	-9.50095	-984.996	-1083.04	-657.988	-784.893	-916.344	-1167.56	-1166.43	-998.679	-870.519	-722.654	-724.683	-807.147	-940.049	-1123.47	-1000.56	-1187.62	-1278.63	-1383.91	-1281.24	-1007.04	-1183.61	-1230.93	-1018.38	-1131.67	-956.393	-870.519	-893.119	-1059.99	-1688.35	-1356.22	-1281.24	-1152.57	-1144.55	-785.987
			84.709	-33.5956	-84.582	-16.0752	97.7394	-877.756	-975.795	-550.747	-677.653	-809.104	-1060.32	-1059.19	-891.439	-763.279	-615.414	-617.443	-699.907	-832.809	-1016.23	-893.322	-1080.38	-1171.39	-1276.67	-1174	-1239.83	-757.994	-1123.69	-911.138	-1024.43	-849.152	-763.279	-785.878	-952.75	-1581.11	-1248.98	-1174	-1045.33	-1037.31	-678.746
			-118.305	-169.291	-100.784	13.0304	-962.465	-1060.5	-635.456	-762.362	-893.813	-1145.02	-1143.9	-976.148	-847.988	-700.123	-702.152	-784.616	-917.518	-1100.94	-978.031	-1165.09	-1256.09	-1361.37	-1258.71	-1324.54	-1161.08	-1107.62	-995.847	-1109.14	-933.861	-847.988	-870.587	-1037.46	-1665.82	-1333.69	-1258.71	-1130.04	-1122.02	-763.455
			-50.9864	17.5204	131.335	-844.16	-942.199	-517.152	-644.057	-775.508	-1026.72	-1025.59	-857.843	-729.683	-581.818	-583.847	-666.311	-799.213	-982.638	-859.726	-1046.78	-1137.79	-1243.07	-1140.4	-1206.23	-1042.77	-1090.1	-1018.38	-990.834	-815.557	-729.683	-752.283	-919.154	-1547.52	-1215.38	-1140.4	-1011.73	-1003.71	-645.151
			68.5068	182.321	-793.174	-891.213	-466.165	-593.071	-724.522	-975.734	-974.608	-806.857	-678.697	-530.832	-532.861	-615.325	-748.227	-931.651	-808.74	-995.798	-1086.8	-1192.08	-1089.42	-1155.25	-991.785	-1039.11	-826.556	-1024.43	-764.57	-678.697	-701.296	-868.168	-1496.53	-1164.4	-1089.42	-960.748	-952.728	-594.164
			113.815	-861.681	-959.719	-534.672	-661.578	-793.029	-1044.24	-1043.11	-875.363	-747.204	-599.338	-601.367	-683.831	-816.733	-1000.16	-877.247	-1064.3	-1155.31	-1260.59	-1157.92	-1223.75	-1060.29	-1107.62	-895.062	-1008.35	-933.861	-747.204	-769.803	-936.675	-1565.04	-1232.9	-1157.92	-1029.26	-1021.23	-662.671
			-975.496	-1073.53	-648.487	-775.392	-906.844	-1158.06	-1156.93	-989.178	-861.019	-713.153	-715.182	-797.646	-930.548	-1113.97	-991.061	-1178.12	-1269.12	-1374.41	-1271.74	-1337.57	-1174.11	-1221.43	-1008.88	-1122.17	-946.892	-729.683	-883.618	-1050.49	-1678.85	-1346.72	-1271.74	-1143.07	-1135.05	-776.486
			-98.0385	327.009	200.103	68.652	-182.56	-181.433	-13.6826	114.477	262.342	260.313	177.849	44.9475	-138.477	-15.5658	-202.624	-293.629	-398.91	-296.243	-362.071	-198.611	-245.938	-33.3816	-146.673	28.6037	114.477	-701.296	-74.9938	-703.356	-371.222	-296.243	-167.574	-159.554	199.01
			425.047	298.142	166.691	-84.521	-83.3949	84.3559	212.516	360.381	358.352	275.888	142.986	-40.4386	82.4727	-104.585	-195.591	-300.871	-198.205	-264.033	-100.572	-147.9	64.657	-48.6347	126.642	212.516	189.916	-936.675	-605.318	-273.184	-198.205	-69.5358	-61.5156	297.048
			-126.906	-258.357	-509.568	-508.442	-340.691	-212.532	-64.6664	-66.6953	-149.159	-282.061	-465.486	-342.575	-529.633	-620.638	-725.918	-623.252	-689.08	-525.62	-572.947	-360.39	-473.682	-298.405	-212.532	-235.131	-402.003	-1678.85	-698.231	-623.252	-494.583	-486.563	-127.999
			-131.451	-382.663	-381.537	-213.786	-85.6261	62.2393	60.2103	-22.2538	-155.156	-338.58	-215.669	-402.727	-493.732	-599.013	-496.346	-562.175	-398.714	-446.041	-233.485	-346.776	-171.499	-85.6261	-108.225	-275.097	-903.46	-371.222	-496.346	-367.677	-359.657	-1.09328
			-251.212	-250.085	-82.3346	45.825	193.69	191.661	109.197	-23.7045	-207.129	-84.2178	-271.276	-362.281	-467.562	-364.895	-430.723	-267.263	-314.59	-102.034	-215.325	-40.0483	45.825	23.2257	-143.646	-772.008	-439.874	-198.205	-236.226	-228.206	130.358
			1.12608	168.877	297.037	444.902	442.873	360.409	227.507	44.0823	166.994	-20.0642	-111.07	-216.35	-113.684	-179.512	-16.0513	-63.3787	149.178	35.8863	211.163	297.037	274.437	107.566	-520.797	-188.663	-113.684	-494.583	23.0054	381.569
			167.751	295.91	443.776	441.747	359.283	226.381	42.9563	165.868	-21.1903	-112.196	-217.476	-114.81	-180.638	-17.1774	-64.5048	148.052	34.7602	210.037	295.91	273.311	106.44	-521.923	-189.789	-114.81	13.8592	-359.657	380.443
			128.16	276.025	273.996	191.532	58.6301	-124.795	-1.88318	-188.941	-279.947	-385.227	-282.561	-348.389	-184.928	-232.256	-19.699	-132.991	42.2863	128.16	105.56	-61.3112	-689.674	-357.54	-282.561	-153.892	-145.872	130.358
			147.865	145.836	63.3724	-69.5295	-252.954	-130.043	-317.101	-408.106	-513.387	-410.72	-476.548	-313.088	-360.415	-147.859	-261.15	-85.8733	0	-22.5993	-189.471	-817.833	-485.699	-410.72	-282.051	-274.031	84.5329
			-2.02894	-84.493	-217.395	-400.82	-277.908	-464.966	-555.972	-661.252	-558.586	-624.414	-460.953	-508.281	-295.724	-409.016	-233.739	-147.865	-170.465	-337.336	-965.699	-633.565	-558.586	-429.917	-421.897	-63.3325
			-82.4641	-215.366	-398.791	-275.879	-462.937	-553.943	-659.223	-556.557	-622.385	-458.924	-506.252	-293.695	-406.987	-231.71	-145.836	-168.436	-335.307	-963.67	-631.536	-556.557	-427.888	-419.868	-61.3036
			-132.902	-316.327	-193.415	-380.473	-471.479	-576.759	-474.093	-539.921	-376.46	-423.788	-211.231	-324.523	-149.246	-63.3724	-85.9716	-252.843	-881.206	-549.072	-474.093	-345.424	-337.403	21.1605
			-183.425	-60.5133	-247.571	-338.577	-443.857	-341.191	-407.019	-243.558	-290.886	-78.3291	-191.621	-16.3438	69.5295	46.9302	-119.941	-748.304	-416.17	-341.191	-212.522	-204.502	154.062
			122.911	-64.1465	-155.152	-260.433	-157.766	-223.594	-60.1336	-107.461	105.096	-8.19609	167.081	252.954	230.355	63.4833	-564.879	-232.745	-157.766	-29.0971	-21.0769	337.487
			-187.058	-278.063	-383.344	-280.678	-346.506	-183.045	-230.372	-17.8158	-131.107	44.1695	130.043	107.444	-59.428	-687.791	-355.657	-280.678	-152.009	-143.988	214.576
			-91.0055	-196.286	-93.6196	-159.448	4.01289	-43.3146	169.242	55.9504	231.227	317.101	294.501	127.63	-500.733	-168.599	-93.6196	35.0494	43.0696	401.634
			-105.281	-2.61419	-68.4422	95.0183	47.6909	260.248	146.956	322.233	408.106	385.507	218.635	-409.727	-77.5932	-2.61419	126.055	134.075	492.639
			102.666	36.8383	200.299	152.971	365.528	252.236	427.513	513.387	490.787	323.916	-304.447	27.6873	102.666	231.335	239.356	597.92
			-65.828	97.6325	50.3051	262.862	149.57	324.847	410.72	388.121	221.25	-407.113	-74.979	0	128.669	136.689	495.253
			163.461	116.133	328.69	215.398	390.675	476.548	453.949	287.078	-341.285	-9.15099	65.828	194.497	202.517	561.081
			-47.3275	165.229	51.9375	227.215	313.088	290.489	123.617	-504.746	-172.612	-97.6325	31.0365	39.0567	397.621
			212.557	99.265	274.542	360.415	337.816	170.944	-457.418	-125.284	-50.3051	78.364	86.3841	444.948
			-113.292	61.9853	147.859	125.259	-41.6123	-669.975	-337.841	-262.862	-134.193	-126.173	232.391
			175.277	261.15	238.551	71.6794	-556.683	-224.549	-149.57	-20.901	-12.8809	345.683
			85.8733	63.274	-103.598	-731.96	-399.826	-324.847	-196.178	-188.158	170.406
			-22.5993	-189.471	-817.833	-485.699	-410.72	-282.051	-274.031	84.5329
			-166.872	-795.234	-463.1	-388.121	-259.452	-251.432	107.132
			-628.363	-296.229	-221.25	-92.5805	-84.5603	274.004
			332.134	407.113	535.782	543.802	902.366
			74.979	203.648	211.668	570.232
			128.669	136.689	495.253
			8.02016	366.584
			358.564
MT#8 (3)			-381.59	-1017.98	-1401	-1533.37	-1788.18	-2209.52	-2288.45	-2609	-2823.15	-3329.94	-3245.4	-3438.39	-3670.59	-3782.89	-4204.65	-4417.39
			-636.393	-1019.41	-1151.78	-1406.59	-1827.93	-1906.86	-2227.41	-2441.56	-2948.35	-2863.81	-3056.8	-3289	-3401.3	-3823.06	-4035.8
			-383.017	-515.391	-770.194	-1191.54	-1270.46	-1591.02	-1805.17	-2311.96	-2227.42	-2420.41	-2652.61	-2764.91	-3186.67	-3399.4
			-132.374	-387.176	-808.519	-887.447	-1208	-1422.15	-1928.94	-1844.4	-2037.39	-2269.59	-2381.89	-2803.65	-3016.39
			-254.802	-676.145	-755.073	-1075.62	-1289.77	-1796.56	-1712.03	-1905.02	-2137.22	-2249.52	-2671.28	-2884.01
			-421.342	-500.27	-820.822	-1034.97	-1541.76	-1457.23	-1650.22	-1882.41	-1994.72	-2416.48	-2629.21
			-78.928	-399.48	-613.63	-1120.42	-1035.89	-1228.88	-1461.07	-1573.37	-1995.14	-2207.87
			-320.552	-534.702	-1041.49	-956.958	-1149.95	-1382.14	-1494.45	-1916.21	-2128.94
			-214.15	-720.939	-636.406	-829.396	-1061.59	-1173.89	-1595.66	-1808.39
			-506.789	-422.256	-615.246	-847.441	-959.743	-1381.51	-1594.24
			84.5334	-108.457	-340.652	-452.954	-874.717	-1087.45
			-192.99	-425.185	-537.487	-959.25	-1171.98
			-232.195	-344.497	-766.26	-978.991
			-112.302	-534.065	-746.796
			-421.763	-634.494
			-212.731
MT#8 (4)			-305.317	-369.628	-1068.62	-2085.07	-2872.83	-3485.78	-4266.33	-5358.14
			-64.3115	-763.302	-1779.75	-2567.52	-3180.46	-3961.01	-5052.82
			-698.99	-1715.44	-2503.2	-3116.15	-3896.7	-4988.51
			-1016.45	-1804.21	-2417.16	-3197.71	-4289.52
			-787.766	-1400.71	-2181.26	-3273.07
			-612.948	-1393.5	-2485.3
			-780.55	-1872.36
			-1091.81
	N	0	451	417	383	349	316	285	260	236	212	191	174	161	149	137	127	119	112	106	100	95	91	87	83	79	75	71	67	64	61	59	57	55	54	53	52	51	50	49	48	47	46	45	44	43	42	41	40
	Average	0	-289.534	-566.488	-821.742	-1040.46	-1225.27	-1370.8	-1495.1	-1597.3	-1632.67	-1620.16	-1579.23	-1521.28	-1444.89	-1302.14	-1212.06	-1229.56	-1242.7	-1277.98	-1293.81	-1296.4	-1295.59	-1277.92	-1253.1	-1216.93	-1155.3	-1119.76	-931.701	-822.315	-688.618	-583.762	-459.415	-318.562	-340.116	-359.467	-357.524	-356.761	-359.168	-361.117	-359.364	-355.662	-351.847	-353.91	-366.672	-375.199	-379.189	-394.755	-417.902
	SD	0	350.279	621.353	888.681	1147.28	1368.4	1555.12	1704.53	1868.16	2001.91	2099.4	2150.03	2141.49	2060.03	1814.62	1581.23	1656.45	1727.06	1820.17	1917.6	2009.65	2091.7	2158.48	2213.25	2259.29	2280.19	2326.22	2184.04	2065.74	1882.91	1645.14	1281.43	600.678	597.639	604.061	626.784	634.881	634.569	650.147	660.604	655.766	655.93	654.738	641.316	628.182	608.341	572.829	538.989
	SEM	0	16.494	30.4278	45.4095	61.4127	76.9787	92.1174	105.71	121.607	137.492	151.907	162.994	168.773	168.764	155.033	140.311	151.846	163.191	176.791	191.76	206.185	219.27	231.414	242.936	254.19	263.294	276.071	266.823	258.218	241.082	214.179	169.73	80.9954	81.3284	82.9741	86.9192	88.9011	89.7416	92.8782	95.35	95.6533	96.7117	97.6026	96.6821	95.7969	93.869	89.4609	85.2216
	Time	0	1	2	3	4	5	6	7	8	9	10	11	12	13	14	15	16	17	18	19	20	21	22	23	24	25	26	27	28	29	30	31	32	33	34	35	36	37	38	39	40	41	42	43	44	45	46	47
[truncated: 51 more columns]
