# Supplementary material for: Intracellular functions and motile properties of bi-directional kinesin-5 Cin8 are regulated by neck linker docking
Source: eLife. 2021 Aug 13;10:e71036. doi: 10.7554/eLife.71036 (PMC8456603; doi:10.7554/eLife.71036)
Supplement: Figure 5—source data 1. [file elife-71036-fig5-data1.xlsx]

## Sheet: 0
	MTs only
n	246
SEM	16.334
SD	256.19
Average intensity (a.u)	1816.93
	1577.45
	1432.31
	1536.68
	1501.77
	1482.93
	1342.7
	1531.43
	1553.66
	1380.4
	1699.6
	1992.64
	1618.3
	1845.8
	1756.39
	1696.74
	2009.33
	1488.58
	1853.7
	1864.77
	1710.2
	1952.85
	1920.86
	1949.86
	1309.3
	1315.45
	1861.71
	1810.9
	1723.33
	1897.57
	1789.45
	1834.67
	1608.13
	1559.82
	1694.17
	1589.83
	1754
	1612.2
	2546
	2264.43
	2053.6
	1940.22
	1451.59
	2187
	1991.53
	1516.88
	1861.75
	1701.35
	1912.74
	1621.78
	1625.63
	2252.3
	2270.5
	2252.32
	1761.83
	1785.68
	1581.08
	1702.77
	1681.9
	1759.46
	1801.96
	1632.6
	1976.2
	1457.38
	1964.67
	1487.59
	1575.06
	1931.23
	1848.92
	2174.42
	2030.08
	2247.14
	1942.74
	1845.45
	1791.39
	1939.54
	2330.79
	1978.24
	2018.67
	2198.62
	1500.49
	1648.52
	2168.29
	2231
	2118.19
	1745.27
	1979.42
	1655.22
	1895.8
	2016.6
	1710.59
	2077.18
	1510.38
	2285.18
	1759.57
	1815.1
	1854.56
	1639.56
	1755.05
	1717.28
	1852.52
	1546.28
	1762.17
	1723.7
	2410.69
	1427.76
	1577.88
	2165.64
	1718.33
	2188.56
	2095.65
	1648
	1603.05
	1824.45
	1532.56
	1515.26
	1436.95
	1574.6
	1804.55
	1661.33
	1614.21
	1657.7
	1462
	1644.64
	1858.8
	1701.15
	1706.58
	2305.17
	1990.93
	1836.3
	1974.83
	2316.52
	1717.48
	1513.19
	2364.68
	1931.31
	1977
	1690.24
	1619.48
	1925.77
	2255.36
	1463.17
	1924.24
	1922.92
	1634.24
	1815.33
	1737.31
	1928.04
	2436.24
	1593.56
	1398.41
	2099.88
	1847.98
	1596.8
	1845.31
	1663.5
	1669.5
	1923.38
	1946.41
	1595.52
	2187.22
	1810.76
	1619.47
	1826.69
	1608.7
	1871.3
	2069.94
	1714.43
	1728
	1791.94
	2167.17
	1875.65
	1930.86
	1752.9
	2001.46
	2165.04
	1588.63
	1807.57
	1656.61
	1874.31
	1983.34
	1791.05
	2006.74
	1992.65
	1396.62
	1813.13
	2034.45
	1645.3
	2109.11
	1624.82
	1977.16
	2267.29
	2318.5
	1814.39
	1836.55
	1826.24
	1806.92
	1822.72
	2416.94
	2044.33
	2242.1
	2289.78
	2216.94
	2267.15
	1877.55
	1940.97
	1620.62
	1508.08
	1843.19
	1529.7
	1375.43
	2037.41
	1731.42
	2102.69
	1527.44
	1599.13
	1509.6
	1854.2
	1558.73
	1899.87
	1622.14
	1520.92
	2168.38
	2235.94
	1682.96
	1502.14
	1665.95
	1748.03
	1752.4
	1834.18
	2071.53
	1453.23
	2130
	1298.95
	2288.63
	2056.39
	1989.4
	1821.91
	1519.59
	1818.69
	1499.82
	1764.18
	1558.13
	1642.85
	1773.73
	1529.85
	1452.71

## Sheet: 0.03
	wt Cin8
n	168
SEM	19.6893
SD	255.203
Average intensity (a.u)	1846.48
	1588.23
	1615.59
	1614.36
	1748.82
	1440.29
	1596.65
	1571.24
	1484.25
	1540.32
	1694.81
	1694.47
	1693.42
	1983.96
	1895.76
	2014.37
	1894.41
	1977.66
	1934.1
	1937.75
	1933.53
	2081.42
	1867.77
	1958.1
	1658.65
	2098.12
	2256.45
	1865.33
	1914.38
	2065.8
	1932.38
	1900.79
	2180.21
	1827.19
	2253.39
	1754.09
	1426.71
	1837.29
	2040.45
	2538.43
	2069.55
	1825.18
	2045.93
	2189.51
	2096.96
	1984.93
	1965.04
	2089.1
	2168.04
	1930.27
	1762.21
	1299.8
	1363
	1492.32
	1582.36
	1395.5
	1411.14
	1418
	1565.48
	1519.42
	1475.65
	1408.92
	1443.56
	1643.05
	1569.5
	1516.8
	1435.36
	1472.43
	1778.29
	1708.35
	1776.58
	1708.55
	1895.32
	1699.96
	1951
	1967.97
	1901.18
	1818.66
	1904.74
	2023.84
	1853.68
	1819.33
	2260.54
	1955.52
	2482.63
	2150.09
	1702.26
	1772.89
	1858.23
	1779.78
	1835.93
	2021.3
	2023.24
	1822.2
	1927
	1968.13
	2040.23
	1665.56
	1987.55
	2054.96
	1647.87
	1837.28
	1669.05
	1939.07
	2091.41
	1857.51
	2076.54
	1604.11
	1531.82
	1697.14
	1490.57
	1403.09
	1668.91
	1603.89
	1968.45
	1845.39
	1430.31
	1695.82
	1562.5
	1772.57
	2073.14
	1324.95
	1503
	1914.49
	1641.13
	1929.35
	1843.62
	2272.44
	1930.18
	2118.17
	1838.38
	1878.07
	1853.76
	1694.93
	2070.39
	1796.83
	2167.33
	1809.87
	1432.64
	1480.92
	2173.29
	2276.68
	2028.31
	1879.24
	2187.81
	1865.69
	2199.74
	2196.35
	1873.5
	1835.66
	2146.89
	2011.49
	1984.68
	1937.74
	2119.27
	2162.5
	2786.52
	1820.77
	1866.69
	1960.35
	1871.62
	2140.8
	2072.41
	1949.57
	1904.72
	2074.85
	1982.94
	1846.71
	1520.25

## Sheet: 0.17
	wt Cin8	Cin8-G522N	Cin8NLCut7
n	221	209	270
SEM	31.6749	18.0133	14.1893
SD	470.882	260.416	233.154
Average intensity (a.u)	2155.64	1819.68	1854.48
	2583.15	1421.74	1590.55
	2403.54	1405.5	1715.37
	1991.49	1574.24	1634.83
	1400.4	1399.64	1501.31
	1418.62	1859.2	1512.61
	1547.15	1791.15	1698.9
	2722.84	1922.57	1913.07
	1484.73	1728.48	1652.73
	2358.07	1688.26	1821.2
	1650.29	1525.45	1834.23
	2154.55	1626.16	1686.49
	2495.77	1814.54	1631.15
	2945.8	1678.89	1758.6
	2230.45	1878.82	1650.42
	2485.42	2059.43	1856.26
	1520.6	1880.62	2136.39
	2542.55	2231.21	1912.95
	2737.7	2124.86	2028.57
	2522.78	1984.67	1957.91
	2572.86	1920.32	2252.95
	1719.21	1875.18	1834.85
	2107.41	2049.57	2372.44
	2182.11	2242.46	2286.63
	3157.68	2147.55	1981.76
	1833.76	2180.13	1937.89
	2763.64	2389.78	2001.12
	2591.01	1913.71	1881.94
	1556.57	1998.71	2096.93
	2501.5	1834.11	2062.15
	2295.58	1422.45	2021.94
	2234.36	1344.83	1963.38
	2151.65	1660.68	2133.89
	1922.64	1682.11	2131.27
	2592.6	1567.81	2057.83
	2070.63	1638.61	2194.71
	1898.12	1617.1	2139.51
	2956.49	1563.75	2001.72
	2450.97	1705.33	1638.92
	2878.75	1521.07	1814.59
	2325.78	2951.95	1651.13
	1883.19	1885.24	1414.86
	2230.88	1730.66	2083.79
	3235.96	1702.89	2029.83
	1822.29	1756.2	2000.04
	1963.07	1754.2	1506.64
	2291.78	2068.72	1879.21
	2519.71	1941.89	2133.41
	1985.91	1919.83	1866.84
	2624.36	1815.64	2019.64
	2974.49	1858.64	2149.67
	1679.62	1993.66	1887.71
	2103.01	1696.65	1780.06
	2181.98	2147	1970.08
	1394.61	1684.21	1478.89
	1552.5	2166.77	1529.4
	1494.78	2075.3	1465.65
	2432.01	2048.5	1554.53
	1592.87	1813.23	1574.11
	1683.18	2150.99	1487.69
	2346.79	2175.9	1753.75
	2836.66	2218.83	1572.33
	2423	1949.44	1687.39
	2514.43	1518.69	1535.6
	3072.82	2068.89	1644.86
	2917.83	2008.06	1524.6
	2034.21	1758.74	2100.76
	2659.35	1888.87	1848.34
	2995.75	2092.52	1508.42
	1797.75	1591.9	1839
	2559.19	1723.38	1876.67
	1837.17	2111	2010.81
	2873.15	1620.5	1825.66
	2711.92	1808.49	1869.38
	2179.82	1609.7	1745.61
	2112.93	1706.95	2141.87
	3172.64	1387.1	1829.95
	3050.51	1424.08	1492.36
	2069.37	2221.7	2894.23
	2577.77	1558.35	1526.73
	1530.98	1578.18	1689.92
	2860.96	1574.39	1802.47
	1716.3	1718.29	2188.98
	1768.96	1502.39	2098.55
	2899.08	1415.27	1705.18
	1652.1	1699.94	2166.96
	1840.96	1827.42	1848.72
	1568.79	2195.24	2080.32
	2358.18	2036.14	1681.23
	1606.22	2071.55	1669.41
	1683.08	1669.12	1937.39
	1605.43	1900.53	2488.86
	1728.47	1734.33	1983.5
	1945.37	1922.69	1830.17
	1742.36	1739.79	1979.24
	2947.62	2022.89	1937.97
	2729.35	1580.87	1850.5
	1782.6	1606.1	2137.23
	2578.09	1825.71	1913
	2794.4	1945.08	1917.19
	1588.38	2699.01	2205.22
	2350.97	2134.74	1684.59
	2999.38	2001.18	1579.56
	2206.37	1498.33	1888.92
	1960.36	1601.21	1826.67
	2397.49	1460.78	1909.05
	2361	1720.8	2113.87
	1901.75	1495.25	2419.85
	1486.17	1374.74	1892.4
	1791.47	1591.11	2075.38
	1642.45	1643.35	1962.43
	2242.31	1410.17	1780.5
	2919.39	1638.47	2111.14
	2660.96	1551.58	1835.91
	2816.32	1714.2	2093.42
	1598.98	1511.42	1693.5
	1978.76	1683.97	1611.64
	1805.92	1787.16	1856.56
	2106.33	1714.94	1903.55
	1924.61	1822.23	1813.92
	2229.1	2032.76	1835.46
	1719.55	1848	1844.08
	1965.77	1739.56	1866.14
	1768.75	1870.77	1570.63
	1766.16	1801.95	1540.5
	2882.88	2037.66	1510.02
	2042.19	2019.02	1820.16
	1665.32	1595.33	1364.33
	1934.83	1970.5	1722.94
	2525.11	2075.65	1506.82
	2643.65	1815.75	1593.83
	1917.42	2170.82	1518.53
	1722.07	1940.39	1737.69
	1748.35	2145.75	1767.88
	1655.1	2248.95	1608.59
	2226.42	1774.13	1970.13
	2691.29	1765.51	1725.67
	1885.56	1603.21	1931.43
	1667.8	1731.62	1965.68
	2451.4	1485.72	1531.82
	2120.98	1441.04	1804.2
	2794.86	1422.65	1635.76
	2748.74	1475.05	1951.93
	1912.2	1461.33	1643.74
	1700.94	1641.86	1536.81
	1710.85	1500.46	1440.5
	2144.79	1602.26	1890.54
	2042.67	1442.67	1875.09
	1667.94	1947.16	1990.05
	2960.78	1688.66	1973.26
	3022.24	1596.69	2248.13
	2312.39	1855.07	1598.7
	2790.65	2151.53	2111.46
	1844.78	1761.1	1741.66
	1957.12	2003.86	1438.25
	2101.21	1731.89	1905.91
	2962.07	2044.21	2057.68
	1762.23	2273	1810.06
	2750.71	2074.34	1731.12
	2696.34	2125.51	1680.23
	1903.32	2355.6	1558.87
	1785.38	1880.5	1793.79
	2010.17	1856.11	2010.41
	1548.91	1512.09	2047.3
	2271.42	1963.67	1455.92
	1914.91	1918.67	1921.81
	2495.68	1891.46	1586.6
	2704.31	2129.66	1845.81
	1817.35	2073.48	2241.79
	1695	1979.2	1886.6
	3169.56	1983.94	1739.5
	1997.7	1926.47	2202.75
	1424.83	2353.82	1718.82
	2166.21	1757.17	1770.11
	2397.1	1485.07	2194.98
	1639.18	1843.31	2000.04
	1557.86	1684.47	1838.46
	1662.21	1852.71	1851.16
	1421.92	1478.21	1589.53
	2001.6	1956.22	1912.42
	1436.2	1685.19	2419.24
	1569.48	2153.19	1943.08
	1840.34	1441.86	1986.46
	2306.55	1600.35	1680.56
	1915.62	1710.82	1853.82
	1583.64	1806.88	2157.47
	1989.16	1630	2007.82
	2975.53	1731.35	1722.94
	2305.99	1725.44	1745.45
	1614.3	1320.82	1668.55
	1818.51	1737.31	1536.87
	2029.33	1975.62	1513.82
	1921.47	1741.68	1747.97
	2698.07	1282.5	1803.43
	1751.83	1828.52	1856.21
	1953.32	1937.3	1869
	1905.31	1907.63	1518.59
	1645.29	1946.12	1557.26
	1832.26	1682.14	1609.51
	1784.58	1962.13	1539.18
	2037.64	2307.69	1732.47
	2614.21	1748.52	2131
	2644.51	1955.58	1787.94
	1729.14	1528.83	2141.71
	2408.32	1492.56	1741.38
	3001.24	2175.04	1774.28
	2461.92	1984.53	1796.59
	1954.95	1962.79	1942.24
	1734.72	1917.75	1669.25
	2094.57	1796.6	1727.17
	1948.28	2166.95	1633.62
	2197.82		1556.2
	1407.57		1735.88
	2818.86		1736
	2253.74		1688.26
	1687.74		2043.48
	1769.29		1880.27
	2350.79		2115.37
	1968.06		1522.94
	1651.7		1707.27
	1951.81		1821.92
	2386.28		1817.81
	1905.63		1948.69
			1975.23
			1832.37
			1960.73
			1901.56
			1831.47
			1840.5
			1975.15
			1831.04
			1600.21
			1777.83
			1949.77
			1892.8
			2325.67
			1617.6
			1894.19
			2161.44
			1857.13
			1743.38
			1913.16
			1909.94
			2155.25
			2069.9
			1895.69
			2065.97
			2362.79
			2868.96
			1710.38
			2218.58
			2068.86
			1959.5
			1989.22
			1879.47
			1927.25
			1968.02
			1826.76
			1958.9
			2134
			1986.89
			2053.7
			2030.23
			1569.69
			1751.64
			1716.91
			1956.71
			1742.98
			1794.19
			1654.23
			1897.43
			1586.55

## Sheet: 0.34
	wt Cin8
n	141
SEM	39.2369
SD	465.913
Average intensity (a.u)	2250.82
	2397.7
	2506.21
	1465.91
	2585.93
	2246.43
	1992.87
	1863.6
	2860.57
	2237.07
	1685.07
	3065.63
	1864.48
	2369.28
	2024.94
	1777.05
	2814.47
	2830.51
	2751.41
	1849.02
	2328.27
	2665.33
	2352.36
	2689.74
	1844.74
	2278.26
	1779.78
	2518.21
	2711.78
	2846.39
	2590.71
	2953.4
	1861.06
	1730.17
	2353.11
	2620.58
	2854.72
	2942.32
	2432.85
	2112.88
	2209.72
	2070
	1745.93
	2752.04
	1479
	2922.96
	1606.91
	1631.57
	2118.59
	2250.99
	1549.94
	1454.47
	2098.32
	2533.43
	2317.74
	2369.23
	1392.17
	2062.01
	1582.78
	1813.37
	1932.93
	2032.8
	2269.34
	2240.71
	2692.82
	2853.07
	2559.9
	2006.85
	2618.8
	1671.1
	2376.25
	3165.68
	1852.48
	2937.8
	2311.73
	2990.03
	2989.26
	2774.13
	2249.3
	2073.49
	1733.36
	2923.37
	1741.98
	1646.25
	1961.77
	2652.67
	2523.7
	1749.55
	1586.87
	2963.71
	2393.48
	2060.73
	2408.7
	2741.82
	2720.62
	1632.6
	1675.42
	1751.15
	2371.79
	1887.66
	1641.22
	2875.93
	2343.52
	1576.17
	1916.54
	2264.52
	2179.15
	2842.84
	1797.62
	2678.81
	2159.27
	1710
	2339.85
	1644.72
	2930.49
	3172.88
	1759.68
	2450.98
	2480.78
	2574
	1831.54
	1711.12
	2547.42
	2848.99
	1706.5
	1640.16
	1565.26
	1736.21
	1602.1
	2650.74
	2613.56
	1746.94
	2552.46
	2630.78
	2253.36
	2609.78
	2668.9
	2032.96
	2520.19
	2853.41
	1735.61
	2626.63

## Sheet: 0.236-0.285
	Cin8-G522N	Cin8NLEg5-N522G	Cin8NLCut7	Cin8NLEg5
Concentration (µg/ml)	0.278058	0.271723	0.284555	0.236189
n	212	206	206	241
SEM	29.7892	18.2959	35.2226	14.3279
SD	433.737	262.596	505.539	222.429
Average intensity (a.u)	1949.36	1807.49	2138.05	1769.4
	3103.18	1470.3	2910.28	1685.78
	1589.92	1604.35	2823.76	2058.42
	1456.86	2175.73	1504.72	1380.04
	1709.7	1439.42	1688.42	1605.32
	1813.43	1327.28	2013.43	1736.66
	2212.86	1964.85	1901.33	1638.59
	2446.99	1874.71	1559.54	1454.71
	1958.43	1735.18	1592.18	1378.48
	1581.6	2148.82	2857.1	1960.93
	1632.68	2959.59	1811.8	1563.14
	2231.05	2482.06	2800.87	1639.33
	1831.3	1822.88	2602.66	1759.92
	1568.11	1987.25	2636.08	1703.18
	1727.35	1997.66	1801.26	1423.53
	1645.2	1768.46	2541.59	1563.86
	3028.63	1369.86	2815.91	1785.37
	1792.07	1896.23	1672.7	1290.36
	1759.6	2151.05	1654.82	1450.79
	1728.1	1490.22	2074.45	1675.01
	2916.8	1591.44	1741.32	1639.17
	2016.17	1619.33	2282	1665.28
	1908.68	2046.75	1528.58	1776.15
	1891.86	1962.84	2329.5	1797.16
	1417.85	1604.39	2143	1318.37
	1657.51	1832.93	1705.79	1363.42
	1481.38	1930.26	3133.7	1329.31
	1734.84	1537.08	1669	1465.74
	1669.07	1454.5	1855.71	1486.3
	2484.72	1545.29	2083.27	1890.66
	2226.06	1706.26	1600.06	1586.74
	2684.93	1950.8	2881.09	1447.29
	1693.74	1974.88	1643.63	1469.72
	2934.78	1595.43	1941	1506.82
	2076.06	2245.79	2078.34	1474.55
	2065.77	2170.16	2866.45	1644.48
	2464.12	1624.44	3136.01	1617.91
	2565.08	1601.14	2138.07	1665.16
	1769.31	2129.01	1806.07	1428.18
	1900.49	1912.48	1682.77	1632.49
	1675.47	1755.52	1802.98	1752.09
	2213.6	2092.77	1706.64	1812.82
	2614.41	1877.43	2136.65	1574.89
	1852.27	1646.96	1764.6	1604.15
	1763.42	1911.37	2866	1671.95
	1763.56	1629	2844.74	1477.84
	2070.51	1622.19	1971.97	1642.23
	2525.57	1672.09	3054.27	1790.49
	1605.97	2265.94	2776.02	2108.14
	1876.59	1736.26	2914.3	1463
	1517.64	1598.44	1774.87	1905.09
	1425.32	2053.35	1712.21	2050.26
	1328.62	1677.57	2174	1533.85
	1367.17	1621.03	2873.24	1595.77
	1650.93	1593.4	2901.22	1647.34
	1651.66	1605.46	2140.29	2003.4
	1793.7	1860.67	2700.95	1403.08
	1643.73	1816.45	2075.5	1715.22
	1594.79	2282.55	1551.53	1646.3
	1612.71	1898.28	2735.53	1605.62
	1755.54	2321.11	2902.82	1916.62
	2803.44	1445.44	1834.85	1826.51
	1414.11	1966.77	1939.13	1792.27
	1698.68	1501.55	3004.07	1669.52
	1393.79	1734.97	2224.05	1750.57
	1474.63	1661.4	2647.95	1852.25
	1707.36	1959.44	1928.6	2050.75
	1425.39	1737.16	1854.48	1954.3
	1576.28	1738.78	2345.44	1710.21
	1777.52	2067.15	3029.8	1578.47
	1554.97	1706.62	1713.7	1615.83
	1427.06	1630.09	1990.7	1902.09
	2438	1756.38	2914.14	2116.55
	1786.11	1841.98	1884.47	2204.61
	1926.02	2069.65	1782.45	1891.94
	2633.5	1537.91	2590.29	2232.62
	1707.42	2095.12	1703.36	1943.71
	2246.42	1608.26	2810.08	2243.22
	1941.9	1846.76	2030.86	2204.31
	1634.8	1980	2397.56	2015
	1653.21	1953.05	1553.17	2144.16
	1559.36	1640.58	1472.77	1535.55
	2184.57	1609.8	1485.09	1905.89
	2687.98	1734.37	1548.14	1941.31
	1641.56	1575.89	1942.73	2191.71
	1624.34	1913.74	1775.78	1873.5
	2618.61	1696.56	1393.42	1955.94
	2103.76	1331.5	1955.3	1738.87
	1672.65	1468.55	2672.45	2105.26
	1941.63	1646.24	1802.43	1492.15
	1800.93	1454.29	2980.68	1715.49
	1765.29	1791.53	1753.08	1972.08
	2072.23	1635.51	1667.85	1997.23
	1720.08	1930.62	2734.12	1713.97
	2014.23	1618.62	1749.44	2296.77
	2934.23	1770.42	3163.83	2003.1
	1847.92	1626.48	1754.67	1594.39
	1691.58	1848.39	2558.51	1588.98
	1664.31	1824.32	2573.13	1580.36
	1620.54	2680.16	3147.43	1927.03
	2806.9	2051.92	1677.48	1842.16
	1560	1816.69	2273.38	2036.84
	1791.28	2107.26	1809.14	1947.27
	1932.53	2000.92	1746.6	1916.08
	2165.04	2193.91	1596.65	2005.96
	2788.85	1807.13	1531.09	2012.17
	2553.66	1881.66	1634.55	1618.23
	1712.6	2047.29	2908.64	2151.58
	1563.49	2044.08	1746.73	1920.97
	2513.82	1788.31	2589.98	1739.09
	2313.97	1641.08	1560.06	1937.13
	2281.85	1560.7	1785.24	2494.85
	1386.36	1538.72	1668.17	1799.39
	1601.71	1525.3	2914.21	1844.2
	1904.73	1725.65	1801.26	1980.25
	1666.46	1583.82	1845.75	1712.49
	1524.85	1783.1	2265.71	1773.41
	1506.96	1676.44	2111.86	1888.81
	1496.77	1545.5	1686.69	2230.82
	1611.82	1508.08	2128.94	1790.19
	1628.2	1390.08	1355	2012.28
	1374.2	1667	1606.85	1775.68
	1651.77	1680.1	1672.73	1942.19
	1795.46	1825.96	1809.57	1978.33
	1605.83	1541.77	1922.67	1861.15
	2026.3	1679.82	1742.56	1732.78
	1660.45	1932.43	2123.18	1696.2
	1678.61	1575.72	2133.91	1759.67
	1634.79	1944.77	1674.19	1681.69
	1678.8	2084.15	2128.71	1698.8
	1664.09	1861.74	2682.73	1911.2
	1806.67	1871.3	1662.3	1929.44
	1519.64	1959.08	1653.74	1728.22
	2770.54	1894.21	2281.03	1622
	1773.59	2096.93	2548.52	1572.26
	2051.87	1781.31	1949.43	1618.18
	1508.12	2599.71	3167.98	1588.4
	1509.08	2162.17	1546.5	1452.55
	1920.54	1439.33	1477.1	1660.79
	1645.54	1582.46	2024.4	1539.35
	1823.64	1767.64	1899.62	1361
	1807.84	2231.61	1851.59	1744.88
	1731.92	1570.75	1491	1532.45
	1938.37	1823.9	1819.67	1453.89
	2426.71	1871.47	2017.53	1777.56
	1348.77	1835	1758.54	1565.35
	2852.08	2055.99	1908.58	1510.93
	2096.25	1474.03	1849.8	1634
	2387.96	2269.65	1549.79	1748.75
	2695.11	2012.6	2862.8	1546.33
	1782.11	1946.62	2284.3	1729.45
	1669.13	1729.25	2650.43	1431.95
	1552.77	1509.15	2670.57	1476.76
	2977.13	1623.84	2009.66	1821.39
	1894.65	2262.47	2005.09	1547.22
	2064.71	1858.67	3128.55	1681.33
	1764.78	1752.72	1628.31	1771.78
	2783.05	1447.87	1801.84	1814.46
	2836.46	1538.45	2975.91	1647.77
	2155.18	1625.94	1996.31	1768.39
	1739.56	1584.42	1910	1759.68
	2372.14	1790.11	1710.1	1663.64
	1944.17	1608.6	1770.29	1853.73
	2315.07	1545.81	2201.17	1582.83
	2673.72	1652.26	2799.01	1836.13
	1489.54	1559.27	1669.88	1553.95
	1977.77	1561.47	2885.68	1688.36
	1997.04	1638.55	3094.98	1834.29
	2243.9	1599.88	2360.22	1700.51
	1653.24	2548.5	2298.28	1703.37
	2019.36	1579.2	1401.27	1667.2
	1442.42	1891.98	1515.12	2026.55
	1505.89	1492.36	1311.1	1564.75
	2044.92	1933.7	2171.66	1619.8
	2563.94	1819.43	1804.13	1417.81
	1624.26	2097.84	2158.9	2103.86
	2129.57	1927.5	1826.49	1870.42
	1639.65	1706.15	2763.35	1838.43
	2884.48	1949.44	2674.05	2131.77
	2069.67	1783.6	1903.36	1837.86
	1538.35	1833.69	2838.87	1684.21
	2221.82	1707.43	1905.53	1739.5
	2021.05	1816.09	2796.68	1900.67
	2860.69	2203.85	3006.1	1836.4
	2659.66	1901.57	1818.95	1862.93
	1362.75	1885.76	1766.64	1694.19
	1634.83	1973.66	1950.94	1552.51
	1536.33	1552	2922.2	1916.87
	1506.71	1689.64	2395.53	1835.12
	2259.46	1807.52	1939.38	2004.42
	1968.6	2107.28	2011.28	1974.64
	2297.74	1902.08	1648.2	1853.79
	3118.19	1884.86	1876.48	1628.62
	2015.49	1619.06	1733.22	1899.17
	1884.93	2003.2	2887.59	1787.12
	1278.48	2049.61	1539.24	1756.67
	2082.49	1643.29	1707.05	1975.71
	1704.18	1899.28	1816.08	2338.95
	1681.64	1586.31	1629.95	1845.38
	1931.76	1862.36	2356.2	2098.07
	1915.71	1586.75	2900.42	1889.45
	2812.61	2131.67	2536.56	1710.14
	2534.46	1320.08	2799.02	1849.53
	1900.84	1532.88	2844.86	1755.71
	1739.92	2369.25	2460.4	1609.61
	1838.38	1566.15	2523.51	2001.27
	2196.53	2157.13	1794.88	1989.08
	2635.16			1405
	1639.68			2218.2
	1992.16			1617.33
	2630.19			1521
	1793.28			2220.11
	2497.73			1943.07
				1705.26
				1934.89
				1936.22
				1991.93
				1774.18
				2066.55
				1959.47
				1737.15
				1764.67
				1993.43
				1958.89
				1643.07
				1994.94
				1428.07
				2100.31
				1746.54
				1834.72
				2324.15
				1464.38
				1629.57
				1653.05
				1821.15
				1725.21
				1897.87
				1451.83
				1893.68
				1599.57
				2019.28
				1530.45

## Sheet: 0.5
	wt Cin8	Cin8-G522N	Cin8NLCut7	Cin8NLEg5	Cin8NLEg5-N522G
n	180	193	207	201	111
SEM	35.2693	35.9611	35.5179	15.3092	36.502
SD	473.187	499.587	511.014	217.046	384.573
Average intensity (a.u)	2323.67	2325.39	2152.4	1790.14	1978.53
	1615.91	2555	1926.31	1762.61	2709.21
	1726.64	1944.76	2486.33	1632.89	1579.89
	2601.53	2623.56	2148.88	1721.76	2698
	2266.28	2142.44	1817.67	1673.4	1906.48
	2686.88	2607.78	2068.54	1477.17	1841.97
	2235.26	1427.07	1544.28	1457.83	2278.75
	2364.68	1888.75	1455.46	1566.03	2086.95
	1995.21	2741.93	2285.27	2023.06	2529.96
	1846.36	2522.26	2288.18	1718.58	1759.99
	1696.14	3128.74	2219.01	1385.5	1749.38
	2297.62	2614.58	2169.91	2065.5	1619.16
	2121.85	2566.23	2586.58	2072.79	1536.29
	1731.94	2569.62	2985.32	1698.65	1451.92
	2109.25	2975.33	2274.66	1945.89	1787.15
	3057.85	2029.44	2214.93	1686.17	1689.98
	2852.82	1547.58	2590.67	1800.62	1558.89
	2871.32	2684.09	2870.67	1546.12	1462.1
	2879.96	2975.37	2952.55	1889.75	1537.06
	2735.67	2933.26	1670.17	2036.77	1851.44
	2973.9	2847.02	2814.6	1963.45	1701.53
	2021.39	1751.89	1248.73	1652.72	2026.08
	3195.35	1865.27	1236.5	1842.54	2446.49
	1996.94	2469.75	2459.12	1974.1	1886.38
	2799.83	1352.82	2200.25	1908.02	2524.71
	2968.64	1502.55	2803.94	1693.79	2259.53
	2418.14	1860.34	1446.64	1860.83	1609.87
	1621.38	1688.38	1603.65	2194.77	1898.8
	2430.15	1714.89	1392.55	1809.91	2710.04
	2936.43	2823.42	2052.41	1738.21	1958.33
	2788.51	2447.53	1659.05	1685.19	1872.78
	2748.86	1938	1625.7	1728.85	1766.27
	2874.8	2938.33	1874.74	1511.46	1943.23
	1783.35	1755.4	2630.77	1704.52	2407.95
	1896.5	1552.21	1334.7	1425.73	2770.4
	2333.05	2888.4	3113.47	1598.18	1910.61
	2494.04	2428.57	1352.27	1615.96	1760.87
	2219.22	2876.86	1520.73	2174.16	1594.22
	2619.78	2757.63	2270.43	1709.6	1713.4
	2707.73	1783.06	2504.71	1606.2	1833.46
	2046.4	2194.32	2007.98	1631.5	2074.25
	1619.1	2997.99	1954.34	1859.5	1742.59
	2490.9	3100.78	2126.41	1541.6	1911.6
	2527.16	2304.74	2011.16	1688.03	1586.81
	2612.74	2575.2	1562.3	1870.42	2617.41
	2418.27	2936.49	2425.34	1493.55	2502.5
	2497.46	1800.06	1635.83	1744	1639.05
	1957.27	2139.73	2721.63	1764.94	1878.88
	2801.73	1463.33	2286.24	1769	1875.51
	1755.23	1764.96	1406.36	2119.13	2030.77
	2806.08	2656.69	1979.77	1647.02	2251.56
	3100.2	2878.38	1920.06	1797.62	2470.09
	1790.75	2581.85	1539.47	1629.26	1970.54
	2510.78	1959.4	2297.26	2097.55	1376.64
	2715.69	2213.33	2352.88	1807.67	2462.3
	1597.72	2805.2	1707.83	1908.72	1665
	1703.5	2304.42	2363.64	1850.75	2594.84
	2728.2	1913	1997.14	1878.95	1677.47
	2619.73	2961.8	1877.88	1937.73	2118.02
	2642.69	2626.03	1712.88	2053.39	1843.59
	2953.98	2023.42	1990.81	1839.03	1683.08
	2448.42	2323.62	1662.68	1797.63	2082.97
	1707.46	1893.18	1848.85	1671.59	1989.46
	1907.21	2140.3	2298.24	1741.29	1787.14
	2928.88	2736.4	2690.18	2181.57	2812.52
	1786.39	1984.26	1420.81	1858.86	1983.46
	2131.53	2641.86	2489	1894.72	2219.5
	2762.42	2505.93	2023.74	1882.39	2767.41
	1367.3	2771.33	1568.84	1897.93	1961.51
	1597.28	1760.31	1749.68	1724.96	1769.27
	1725.77	2729.44	1417.6	1709.93	1494.25
	2506.94	2751.76	2662.38	1654.61	2013.14
	2445.14	2056.33	1455.25	1514.96	1344.8
	2427.11	2629.01	2608.56	1955.74	2387.52
	2691.18	2964.76	1964.67	1582.88	1796.56
	1873.04	2517.84	1890.74	1591.35	1956.46
	2578.89	2756.61	2078.36	1382.7	1463.6
	1854.94	1853.75	2470.34	1764.62	1842
	2498.03	2442.34	1850.79	1615.47	1436
	2348.82	2525.65	1864.5	1626.83	1530.82
	2465.44	2563.65	1478.6	2254.25	1988.41
	1384.81	1878.11	1417.25	1408.64	2136.16
	1951.12	2533.27	1721.47	1482.14	1924.58
	1705.34	1783.43	2277.65	1517.58	1648.93
	1841.95	2061.79	1311.5	1842.88	2107
	2633.34	2206.98	2046.69	1546.7	2765.45
	1798.32	1506.46	2410.42	1572.81	2828.31
	2928.99	2011.16	1714.12	1825.1	2019.34
	2666.84	1623.43	3327.76	1548.04	2184.88
	2984.25	2511.72	2509.48	1525.34	2578.12
	1999.08	2958.96	2781.11	1893.89	1784.79
	2083.99	2605.78	1583.9	1591.35	1870.95
	2869.95	2480.91	2637.37	1567.51	2489.67
	2434.6	2976.46	2697.32	1822.82	1953.14
	1568.5	2983.38	1834.28	1678.05	1632.42
	1798.12	1683.55	1778.6	1622.15	2635.15
	2135.39	1931.59	2594.28	1594.5	1734.55
	1932.19	2023.9	2168.13	1542.18	2709.21
	1616.23	2208.18	1659.15	1765.86	1579.89
	2497.77	1725.82	2446.6	1508.38	2698
	2562.78	1964.69	1704.39	1736.32	1906.48
	2354.03	1500.36	1938.66	1438.7	1841.97
	2557.98	2788.56	1341.1	1672.55	2278.75
	1957.85	1796.56	2723.73	1641.88	2086.95
	1797.12	1610.95	2771.93	1348.45	2529.96
	3049.96	2262.14	1385.44	1686	1759.99
	2861.03	1622.37	1905.94	1562.48	1749.38
	1821.83	1745.65	1996.6	1738.12	1619.16
	1609.48	2113.46	2024.02	1973.02	1536.29
	2846.67	3106.34	1617.62	1560.71	1451.92
	2627.56	1826.55	2819.43	1601.12	1787.15
	2661.03	2298.27	2842.62	1891.46	1689.98
	2141.9	2627.23	1838.25	1972.72
	2826.18	1813.73	1380.64	1798.4
	1912.17	2710.06	1509.92	1801.87
	3012.12	2387.91	1655.56	1672.41
	2754.49	1893.88	2958.89	1851.9
	2191.42	1835	1782.73	1825.61
	2844.83	1752.48	2803.83	1757.02
	3147.71	2768.62	3047.37	2056.39
	1875.92	2612.97	1573.19	1711.61
	1812.69	2424.15	1827.9	1681.55
	1569.21	1733.6	2519.52	2039.18
	2132.92	2816.78	2724.03	1681.03
	1443.27	1627.14	2887.5	1991.9
	1506.03	2464.34	1590.7	2115.23
	1633.26	3044.89	2855.51	2113.77
	2860.63	1381.68	3368.1	1856.06
	2688.87	1823.3	1698.91	1796.86
	2190.89	1676.72	1570.12	2235.96
	2900.93	2113.7	2633.03	2019.49
	2154.51	1859	2270.14	2004.15
	2828.81	1718.02	1516.82	1844.09
	3126	2914.24	2507.39	2020.5
	2544.9	3283.71	2843.98	2361.45
	2922.99	2342.33	2275.11	2374.27
	2963.99	2246.21	1688.15	1719.66
	2733.45	3282.18	1927.77	2220.07
	2566.2	2150.8	2410.25	2291.44
	2827.71	2893.59	2344.06	1864.62
	1644.36	2375.07	2571.81	2035.46
	1805.19	2011.47	2009.51	1829.74
	2560.17	2479.47	2455.07	2153.54
	2757.71	2879.12	2778.32	1994.14
	2144.51	2921.57	1434.63	1950.16
	1494.31	2901.74	2739.1	1915.62
	2935.48	2786.4	2542.04	2101.84
	2111.54	2126.82	1851.4	1887.54
	2678.78	2962.44	2764.82	1434.29
	2780.22	2179.24	2277.23	2180.87
	2760.85	2591.56	2609.88	1933.53
	2396.01	2237.11	2873.75	1919.5
	2565.4	2384.05	2595.67	1873.85
	1941.89	1495.11	1624.24	1848.23
	2494.63	1763.62	2897.58	1931.04
	1999.87	2953.26	1906.76	1625.24
	1986.35	2900.36	1738.36	1754.12
	1885.89	2166.96	2810.07	1608.52
	1998.84	1774.6	2685.2	1529.1
	2084.69	1751	1762.16	1557.87
	2148.99	2847.83	3184.55	1325.08
	2617.6	2755.52	3056.77	1571.64
	2197.1	2907.41	2693.82	1488.53
	1751.94	2964.76	2829.93	1607.01
	1636	1670.17	2443.6	1382.59
	1893.16	1871.79	1941.23	1504.88
	2622.51	2347.83	1643.8	1569.33
	3030.78	2896.83	1499.67	1727.13
	2990.99	1947.14	1757.64	1552.74
	1598.82	1898.21	1606.97	1692.5
	2575.61	2911.39	1643.2	1636.11
	2891.97	1773.96	2291.38	1754.28
	1508.14	2960.44	2824.57	1769.09
	1470.83	1713.15	2629.87	1632.39
	2073.16	2132.35	2728.08	1617.26
	2455.46	2820.54	2859.11	2069.33
	2548.41	1509.81	2265.28	1768.79
	2166.82	2696.49	2106.95	1986.95
	2512.72	2263.8	2130.73	2126.47
	2463.35	2139.51	1952.54	1917.82
	2250.63	3180.65	2797.63	1853.88
		2923.41	2749.54	1993.16
		1669.5	2728.33	2046.42
		3036.31	1560.6	1934.91
		1791.54	2703.12	2049.06
		1914.32	1594.91	1633.88
		2749.58	1420.46	1740
		1686.08	2261.64	1885.18
		2773.08	2633.38	1817.54
		2836.96	1984.43	2105.77
		2421.65	2159.93	1691.66
		3048.45	1994.25	1562.19
		2181.69	2081.55	2179.81
		3149.06	1558.94	1676.94
			1834.99	1933.8
			2666.93	1990.67
			2859.24	2198.84
			2035.89	1732.64
			2411.93	2095.63
			1549	1765.43
			1707.82	2003.93
			2984.14	1956.11
			2401.01
			1657.59
			2899.09
			2227.23
			2157.17
			1614.33
