# Supplementary material for: Intracellular functions and motile properties of bi-directional kinesin-5 Cin8 are regulated by neck linker docking
Source: eLife. 2021 Aug 13;10:e71036. doi: 10.7554/eLife.71036 (PMC8456603; doi:10.7554/eLife.71036)
Supplement: Figure 6—source data 1. [file elife-71036-fig6-data1.xlsx]

## Sheet: Sliding velocity
wt Cin8 plus end directed [µm/min]	wt Cin8 minus end directed [µm/min]	Cin8-G522N plus end directed [µm/min]	Cin8-G522N minus end directed [µm/min]	Cin8NLCut7 plus end directed [µm/min]	Cin8NLCut7 minus end directed [µm/min]	Cin8NLEg5-NG plus end directed [µm/min]	Cin8NLEg5-NG minus end directed [µm/min]
1.25071	0.958613	2.49825	0.768	0.2784	0.653354	0.275051	0.219927
0.780412	1.03604	2.15952	2.84612	1.11224	0.356748	0.0985436	0.31671
0.779839	1.11049	1.40256	0.308966	0.953209	0.379108	0.238575	0.646095
2.14326	0.905151	0.41353	1.82537	1.10644	0.575105	0.199442	0.155359
1.52303	1.13451	1.40612	1.04531	0.608	0.580923	0.15092	0.148863
1.64571	0.545867	0.426667	0.192	1.63352	9.19073	0.188085	0.456348
0.82944	1.12246	1.44795	0.51927	0.252632	1.19669	0.0951926	0.0829547
0.790083	1.01975	1.29656	1.86297	0.375339	0.880734	0.180717	0.162019
0.686682	0.75695	1.2288	0.366806	0.235886	0.440367	0.130237
0.549729	2.3893	2.07937	0.743394	1.44771	0.199769	0.162921
1.31766		1.78415	0.679466	0.542143	0.233316	0.0886154
0.801356		1.43127		0.352525	0.3904	0.0950368
0.753087		0.368842		0.184709	1.216	0.160069
1.01346		1.827		0.278824		0.647791
0.510992		2.304		1.03445		0.156201
1.05048		2.17159		0.0903529
0.498627		2.26073		1.50591
0.837809		3.03702		0.210344
0.910595		1.40373		0.685714
1.13805		2.52497		0.722441
0.535052		1.7788		0.55296
0.5472		1.536		0.160627
0.650667		1.15399		0.503523
0.644339				0.282
				0.28536
