# Supplementary material for: Intracellular functions and motile properties of bi-directional kinesin-5 Cin8 are regulated by neck linker docking
Source: eLife. 2021 Aug 13;10:e71036. doi: 10.7554/eLife.71036 (PMC8456603; doi:10.7554/eLife.71036)
Supplement: Source data 1. [file elife-71036-data1.xlsx]

## Sheet: Sheet1
	Doubling time (min)
	cin8Δkip1Δ				cin8Δ
wt Cin8	153.189	152.766	151.001		130.782	130.782	119.508
Cin8-G522N	175.297	172.436	177.66		n.d
Cin8NLCut7	202.963	203.493	224.844		138.629	141.459	150.684	141.459
Cin8NLEg5-NG	186.749	209.036	190.17	179.151	n.d
Cin8NLEg5	n.d				157.534	165.035	177.73	169.06
