# Supplementary material for: Intracellular functions and motile properties of bi-directional kinesin-5 Cin8 are regulated by neck linker docking
Source: eLife. 2021 Aug 13;10:e71036. doi: 10.7554/eLife.71036 (PMC8456603; doi:10.7554/eLife.71036)
Supplement: Source data 3. — The average area (± SEM) for the number of cells analyzed is presented in Figure 2E. [file elife-71036-data3.xlsx]

## Sheet: Sheet 1
Area of Cin8 signal (pix2)	wt Cin8	Cin8-G522N	Cin8NLCut7	Cin8NLEg5	Cin8NLEg5-N522G	Cin8NLCut7-N522G
cell 1	20	23	17	151	27	41
cell 2	25	22	75	60	20	28
cell 3	16	6	24	93	10	61
cell 4	20	12	21	67	21	20
cell 5	23	19	13	118	20	18
cell 6	18	11	29	218	4	37
cell 7	22	20	3	140	18	47
cell 8	15	17	9	73	12	65
cell 9	17	11	23	132	32	63
cell 10	12	7	27	80	15	108
cell 11	21	14	15	70	23	243
cell 12	31	12	19	121	20	29
cell 13	23	8	26	87	13	184
cell 14	26	25	23	78	27	53
cell 15	10	18	31	42	10	42
cell 16	26	19	65	112	20	49
cell 17	18	27	54	202	21	25
cell 18	22	8	34	96	20	100
cell 19	29	29	46	81	25	56
cell 20	21		49	85		24
cell 21	13		93	85		53
cell 22	28		54	83		14
cell 23	10		38	74		19
cell 24	28		56	60		37
cell 25	22		41	92		19
cell 26	23		42	106		17
cell 27	55		40	95		62
cell 28	39		35	103		43
cell 29	33		36	44		20
cell 30	50		24	116		42
cell 31	46		39	70		22
cell 32	24		35	74		49
cell 33	54		16	65		37
cell 34	26		29	113		23
cell 35	35		13	98		34
cell 36	13		16	115		31
cell 37	35		36	104		29
cell 38	32		39	69		22
cell 39	53		12	159		23
cell 40	10		32	84		29
cell 41	46		25	98		21
cell 42	23		25	55		26
cell 43	9		34	153		33
cell 44	20		30	125		27
cell 45	23			153		35
cell 46	22			142		32
cell 47	23			116		63
cell 48	18			113		12
cell 49	3			73		97
cell 50	21			113		21
cell 51	26			109		78
cell 52	25			99		69
cell 53	7			95		124
cell 54	20			80		107
cell 55	24			69		20
cell 56	28			99		74
cell 57	18			194		26
cell 58	29					47
cell 59						30
cell 60						104
Average of area of Cin8 signal (pix2)	24.6379	16.2105	32.7955	101.772	18.8421	49.4
SD	11.455	7.02835	17.6379	36.7331	6.87397	40.9862
n	58	19	44	57	19	60
SEM	1.50412	1.61241	2.65902	4.86542	1.577	5.2913
