# Supplementary material for: Intracellular functions and motile properties of bi-directional kinesin-5 Cin8 are regulated by neck linker docking
Source: eLife. 2021 Aug 13;10:e71036. doi: 10.7554/eLife.71036 (PMC8456603; doi:10.7554/eLife.71036)
Supplement: Source data 6. — The distribution and average (± SEM) of run lengths are presented in Figure 4—figure supplement 2B. [file elife-71036-data6.xlsx]

## Sheet: Length
Run length [nm]
wt Cin8	GN	Cut7	Eg5-NG
3168.36	3223.85	1682.75	11386.2
2149.61	4593.4	1492.25	1221.45
2572.53	7620	666.75	8919.22
4350.47	9948.29	1016	2234.02
9087.21	2836.42	1968.5	3952.9
5335.16	1016	127	3005.71
2883.07	6714.6	952.5	1566.43
1228.79	4111.9	2540	3191.91
8418.56	2742.4	783.209	6037.85
6708.54	2176.32	3280.79	766.534
6746.05	2191.27	1037.08	7814.63
412.75	6718.04	592.709	2121.88
920.75	5990.55	1524	7032.89
5080	9231.52	2010.79	5360.96
5397.5	5652.93	21.209	7853.63
5969	1867.03	10572.8	3501.45
1841.5	2694.78	1365.25	4532.87
2984.5	3683.55	11906.2	1736.87
16573.5	2693.84	285.75	1351.28
2508.25	4953	8572.5	3693.18
825.5	2054.19	2952.45	5293.21
2540	609.608	3865.01	4796.13
2825.75	8269.04	2524.47	3487.76
2952.75	7429.09	3540.66	13381.8
1111.25	5987.54	6447.75	4586.45
952.5	2644.86	4692.03	5358.14
7207.25	1555.75	4560.65	1905
6699.25	1619.25	5119.66	3714.75
9620.25	10922	11029.7	698.5
8350.25	3767.58	3412.5	10763.2
7198.7	6985	3769.34	1111.25
4349.8	222.25	2764.51	3598.29
5684.8	3238.5	5248.74	381
1882.78	95.25	5399.12	10318.8
2668.7	3175	4314.87	5111.75
3934.49	5207	2878.69	317.5
4374.13	8890	6734.43	1238.25
3279.37	1312.42	3355.45	1270
5507.89		2434.17	1016
2234.13		953.438	7429.5
2664.41		1942.33
2389.06		3361.4
2729.81		6630.48
3922.13
3909.86
3951.03
3950.93
5673.34
9114.01
5951.41
1740.47
13341.4
3277.79
18687.2
1596.18
4445
22796.5
3209.26
10485.8
12573.6
3685.76
4065.98
7741.34
4626.58
2060.04
3342.11
1186.18
6004.28
4711.98
12086.1
8703.85
2080.19
8122.69
14068.7
2689.54
10308.2
14367.8
11712.8
5123.29
2527.8
7798.01
